# Supplementary material for: A theoretical indicator of transition-metal nanoclusters applied in the carbon nanotube nucleation process: a DFT study
Source: Royal Society of Chemistry journal article supplement (doi:10.1039/c9dt04272e), 2019-12-06
Supplement: c9dt04272e1.pdf [file c9dt04272e1.pdf]

# Supporting Information: A Theoretical Indicator for Transition-Metal Nanoclusters Applied in the Carbon Nanotube Nucleation Process: A DFT Study

Carina S. T. Peraça,<sup>†</sup> Glaucio R. Nagurniak,<sup>†</sup> Renato P. Orenha,<sup>‡</sup> Renato L. T.  
Parreira,<sup>‡</sup> and Maurício J. Piotrowski<sup>\*,†</sup>

*Department of Physics, Federal University of Pelotas, PO Box 354, 96010-900, Pelotas, RS, Brazil,  
and Núcleo de Pesquisas em Ciências Exatas e Tecnológicas, Universidade de Franca, Franca, SP,  
Brazil*

E-mail: mauriciomjp@gmail.com

---

\*To whom correspondence should be addressed

<sup>†</sup>Department of Physics, Federal University of Pelotas, PO Box 354, 96010-900, Pelotas, RS, Brazil

<sup>‡</sup>Universidade de Franca

## A CNT Fragments Tests

Below are provided different unit cell sizes for the armchair and zigzag carbon nanotube fragments.

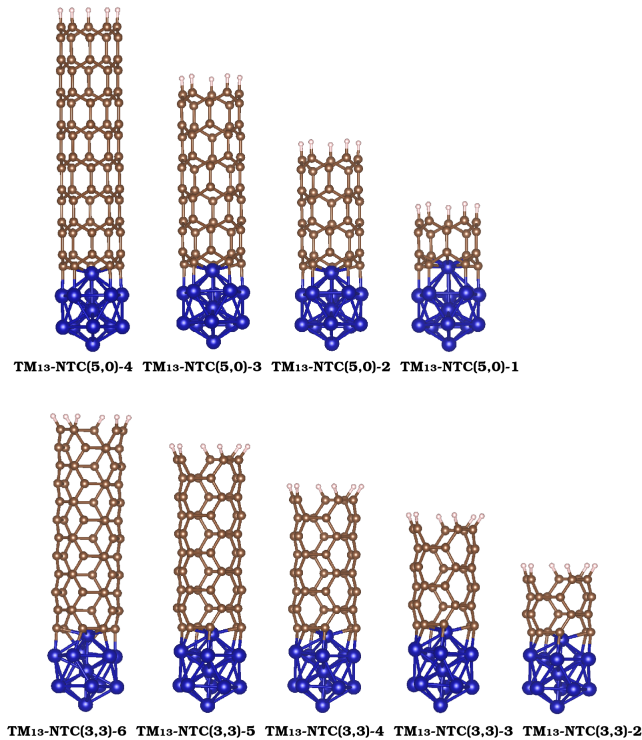

Figure 1: Armchair and zigzag carbon nanotube fragments containing different unit cell sizes and connected to transition-metal nanoclusters.  $TM_{13}\text{-CNT}(x,y)\text{-}z$  indicates the transition-metal species, in nanocluster configuration associated with the carbon nanotube CNT  $(x,y)$ , where  $(x,y)$  indicates the chirality. The unit cell number  $z$  ranges from 1 to 4 for zigzag and from 2 to 6 for armchair.

We have calculated the adhesion energy for all  $TM_{13}\text{-CNT}(x,y)\text{-}z$  as provide below.

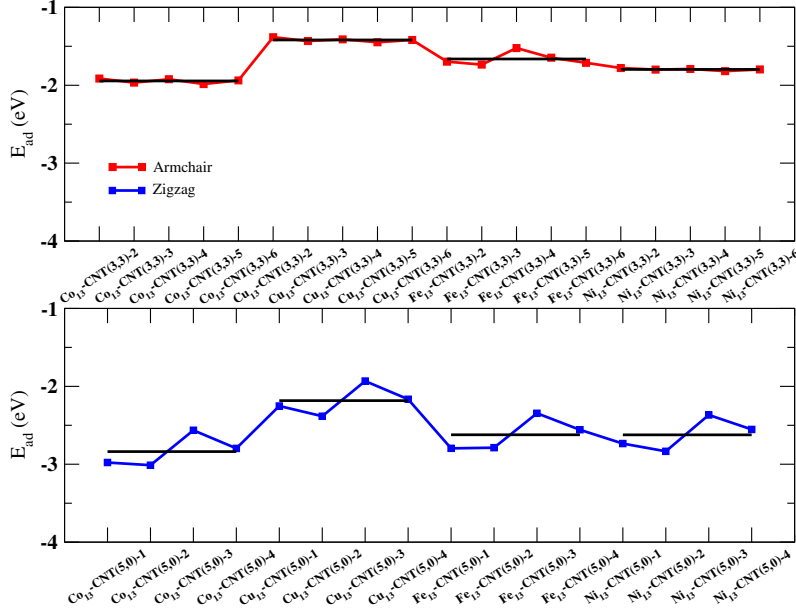

Figure 2: Adhesion energy for  $TM_{13}$ -CNT  $(x,y)$ - $z$  systems.  $TM_{13}$ -CNT  $(x,y)$ - $z$  indicates the transition-metal species, in nanocluster configuration associated with the carbon nanotube CNT  $(x,y)$ , where  $(x,y)$  indicates the chirality. The unit cell number  $z$  ranges from 1 to 4 for zigzag and from 2 to 6 for armchair.

Here, we provided the total magnetic moment for the previous systems with their respective magnetic isomers, calculated by DFT-PBE.

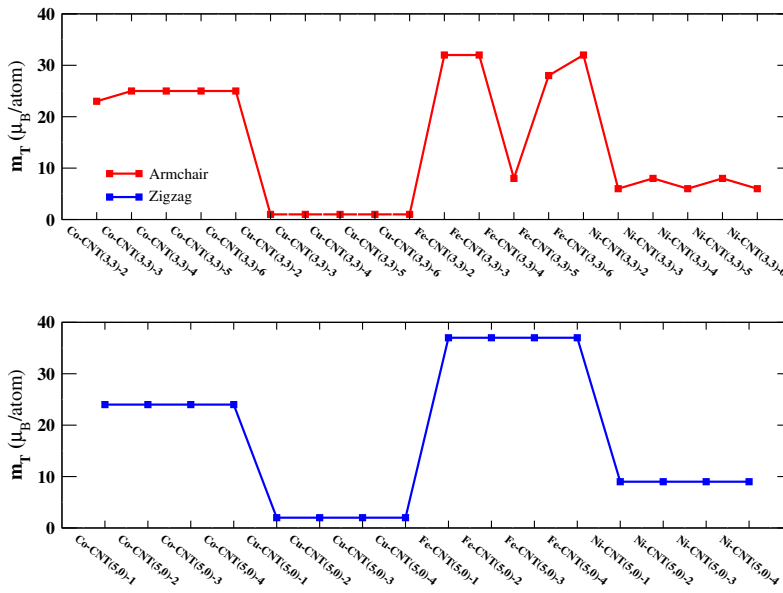

Figure 3: Total magnetic moments for  $TM_{13}$ -CNT $(x,y)$ - $z$  systems, calculated by DFT-PBE.

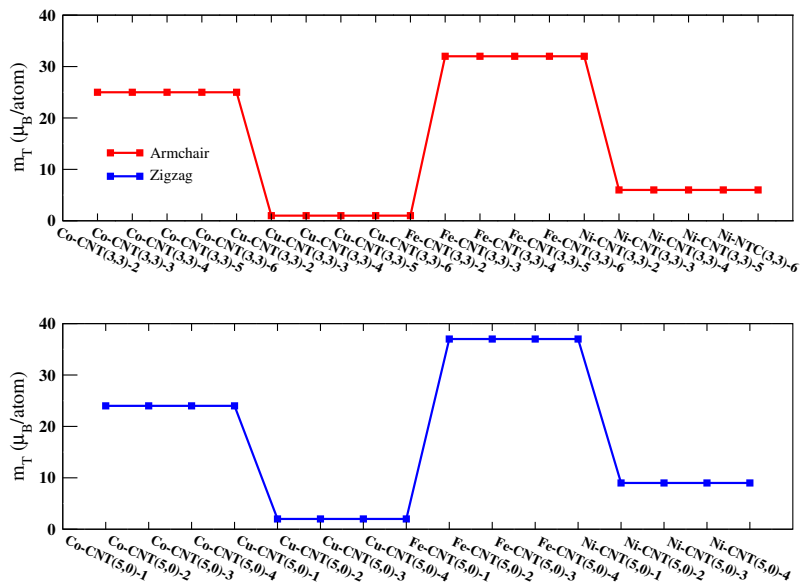

Figure 4: Corrected total magnetic moments for the systems TM<sub>13</sub>-CNT(x,y)-z, calculated by DFT-PBE.

## B The Lowest Energy Configurations – Tests

Below are shown some examples for the calculations of the lowest energy configurations, for the cases where the icosahedral (ICO) is not the most stable configuration. We showed an armchair CNT fragment (3,3) adhered to the lowest configurations for  $\text{TM}_{13}$ , where  $\text{TM} = \text{Co}, \text{Ir}, \text{and Rh}$ .

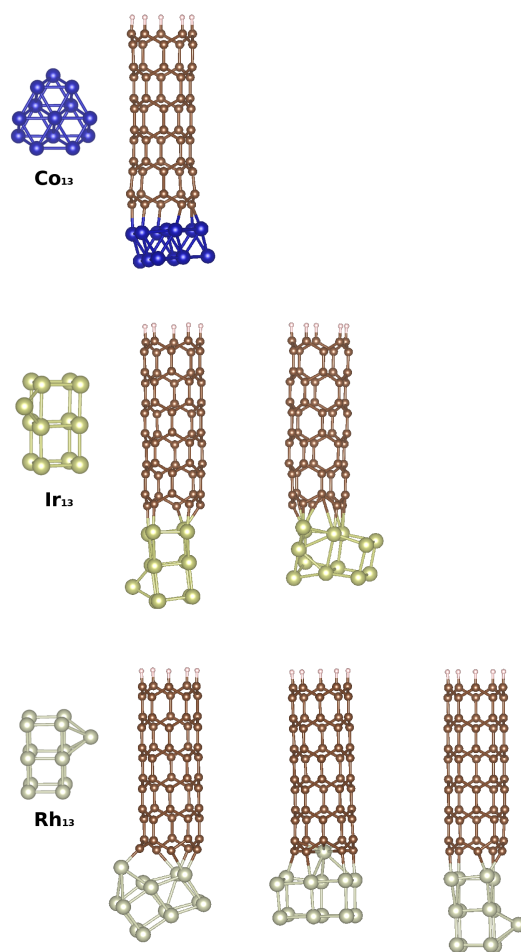

Figure 5: Armchair CNT fragment (3,3) adhered to the lowest energy configurations for  $\text{TM}_{13}$ , where  $\text{TM} = \text{Co}, \text{Ir}, \text{and Rh}$ .

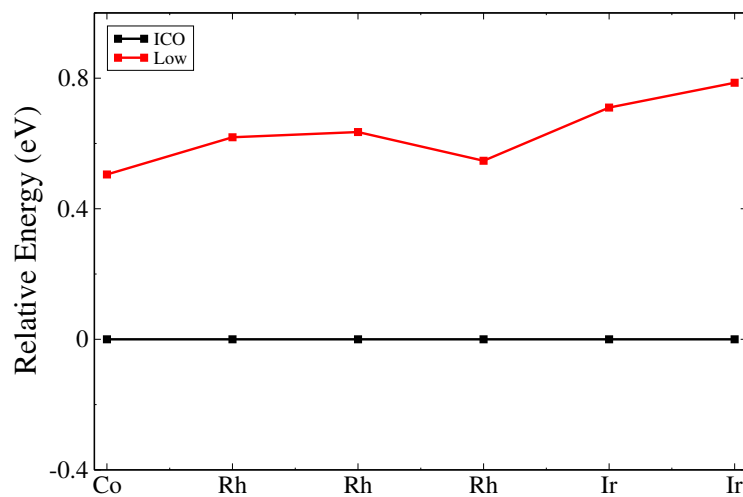

Figure 6: Relative energy between armchair CNT fragment (3,3) adhered to TM<sub>13</sub> with ICO configuration and armchair CNT fragment (3,3) adhered to the lowest configurations for TM<sub>13</sub>, where TM = Co, Ir, and Rh.

## C Nucleation Tests

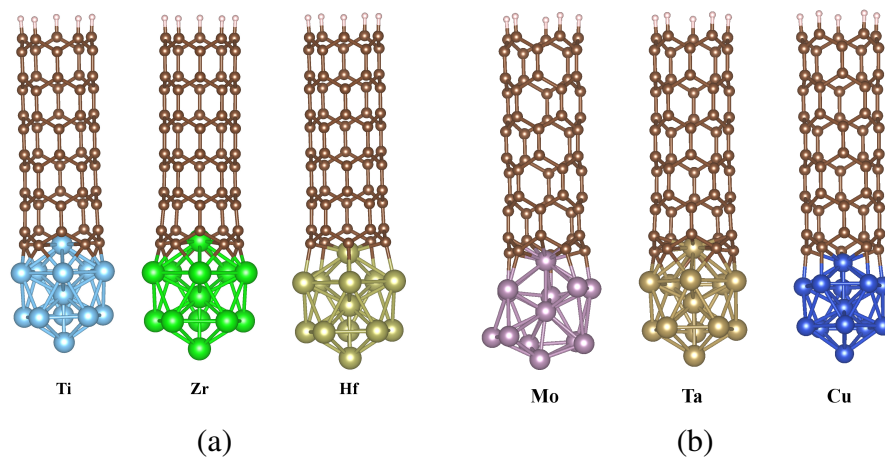

Figure 7: (a) CNT fragments adhered to nanoclusters by bridge site interactions between C and TM atoms, where TM = Ti, Zr, and Hf. (b) CNT fragments adhered to nanoclusters by top site interactions between C and Cu or Mo atoms and between C and Ta atoms adhered by bridge interaction sites.

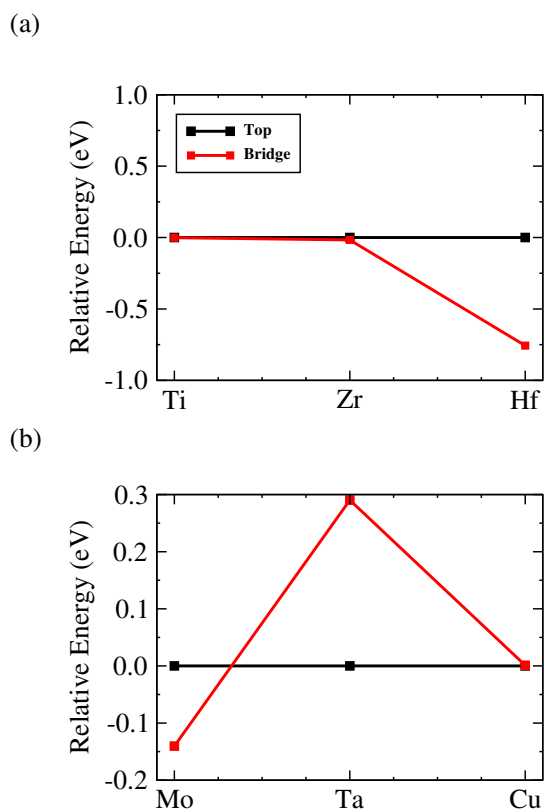

Figure 8: (a) Relative Energy between CNT fragments adhered on  $\text{Ti}_{13}$ ,  $\text{Zr}_{13}$ , and  $\text{Hf}_{13}$  nanoclusters by top and bridge site interactions. (b) Relative Energy between CNT fragments adhered on  $\text{Mo}_{13}$ ,  $\text{Ta}_{13}$ , and  $\text{Cu}_{13}$  nanoclusters by top and bridge site interactions.

## D Results by DFT-PBE-vdW and DFT-PBE-vdW-SOC

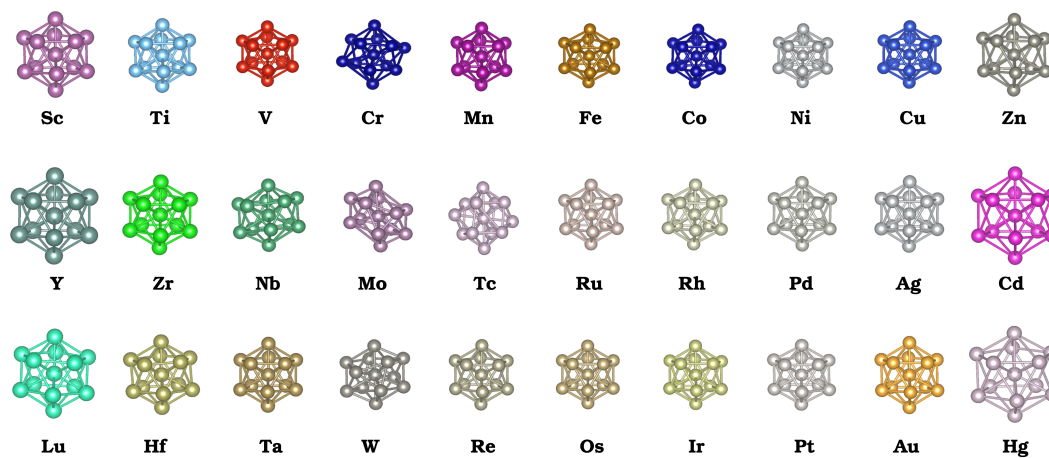

Figure 9: The ICO  $TM_{13}$  configurations obtained for all  $3d$ ,  $4d$ , and  $5d$  elements in gas-phase, by DFT-PBE-vdW-SOC.

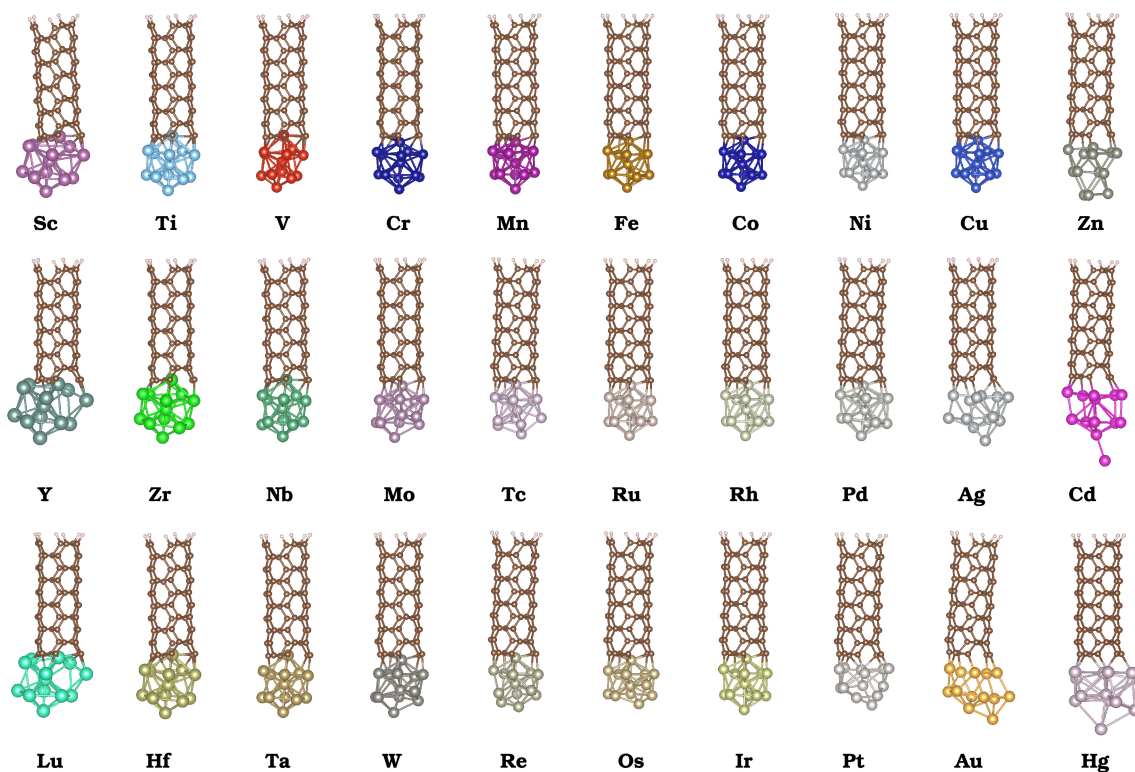

Figure 10: Configurations for (3,3) armchair CNT fragments adhered to  $3d$ ,  $4d$ , and  $5d$   $TM_{13}$  nanoclusters obtained by DFT-PBE-vdW-SOC.



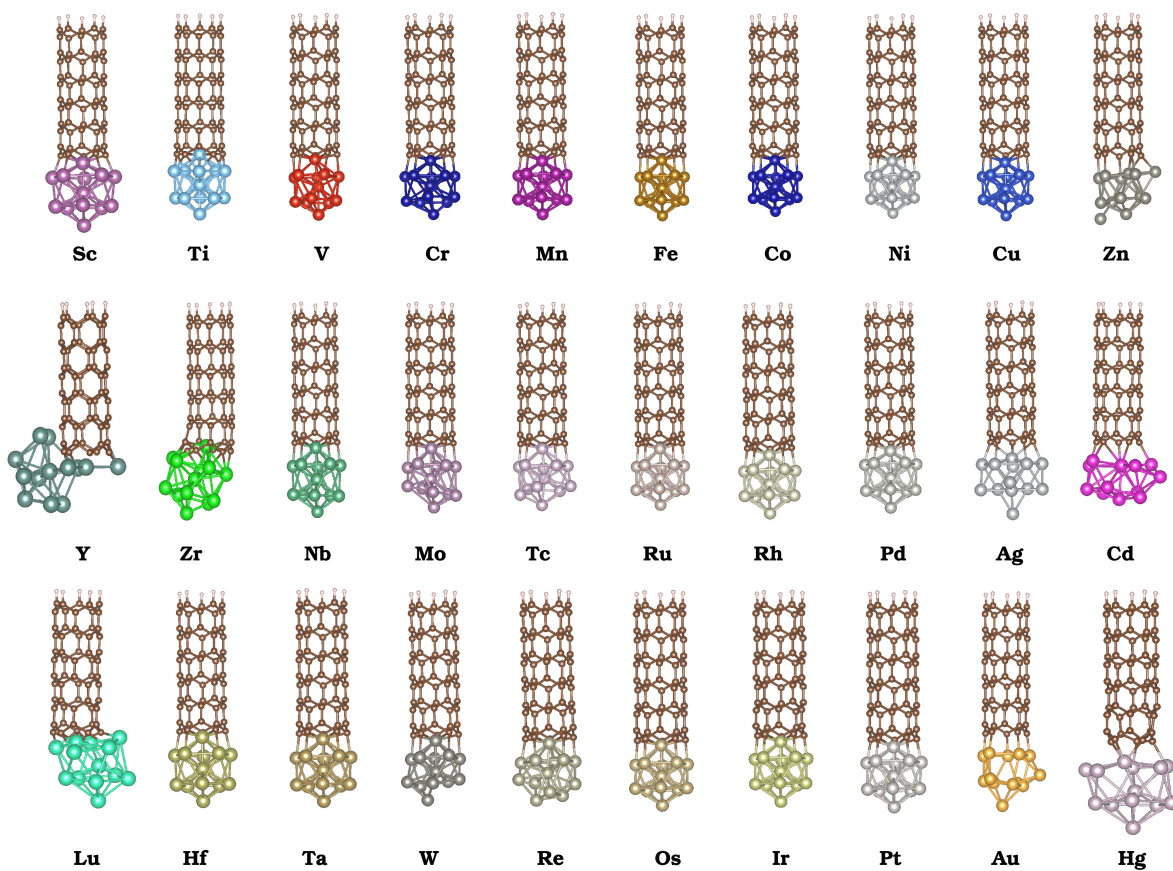

Figure 11: Configurations for (5,0) zigzag CNT fragments adhered to  $3d$ ,  $4d$ , and  $5d$   $\text{TM}_{13}$  nanoclusters obtained by DFT-PBE-vdW-SOC.

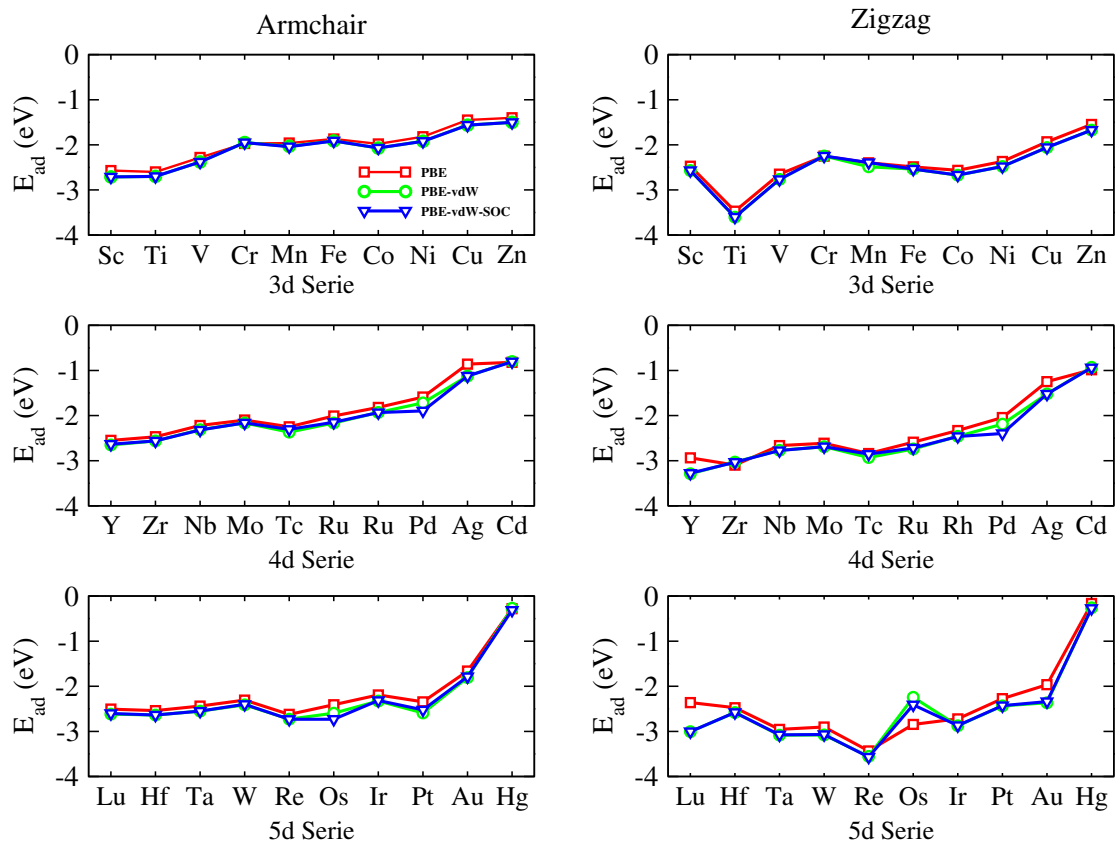

Figure 12: Adhesion energy values for CNT fragments adhered to  $TM_{13}$  nanoclusters using three approaches, PBE, PBE-vdW, and PBE-vdW-SOC.

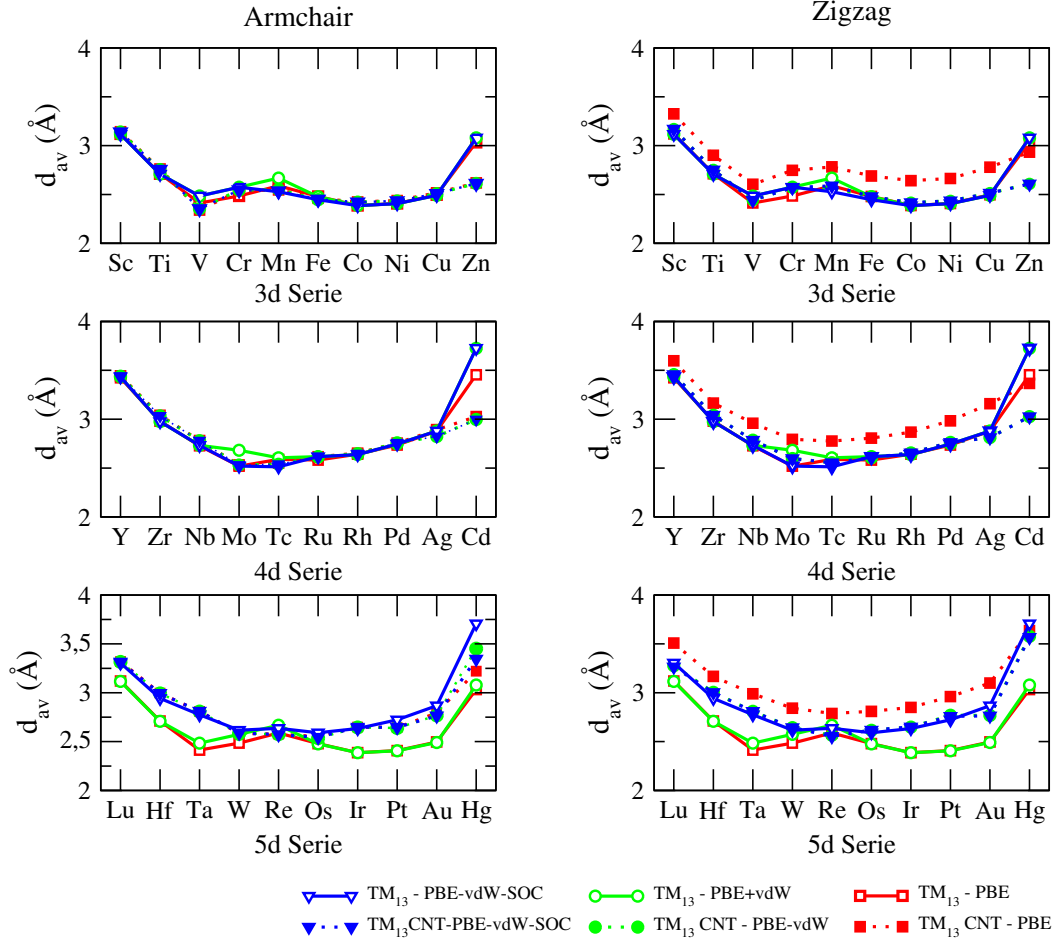

Figure 13: Average bond length,  $d_{av}$ , values for CNT fragments adhered to  $TM_{13}$  nanoclusters using three approaches, PBE, PBE-vdW, and PBE-vdW-SOC.

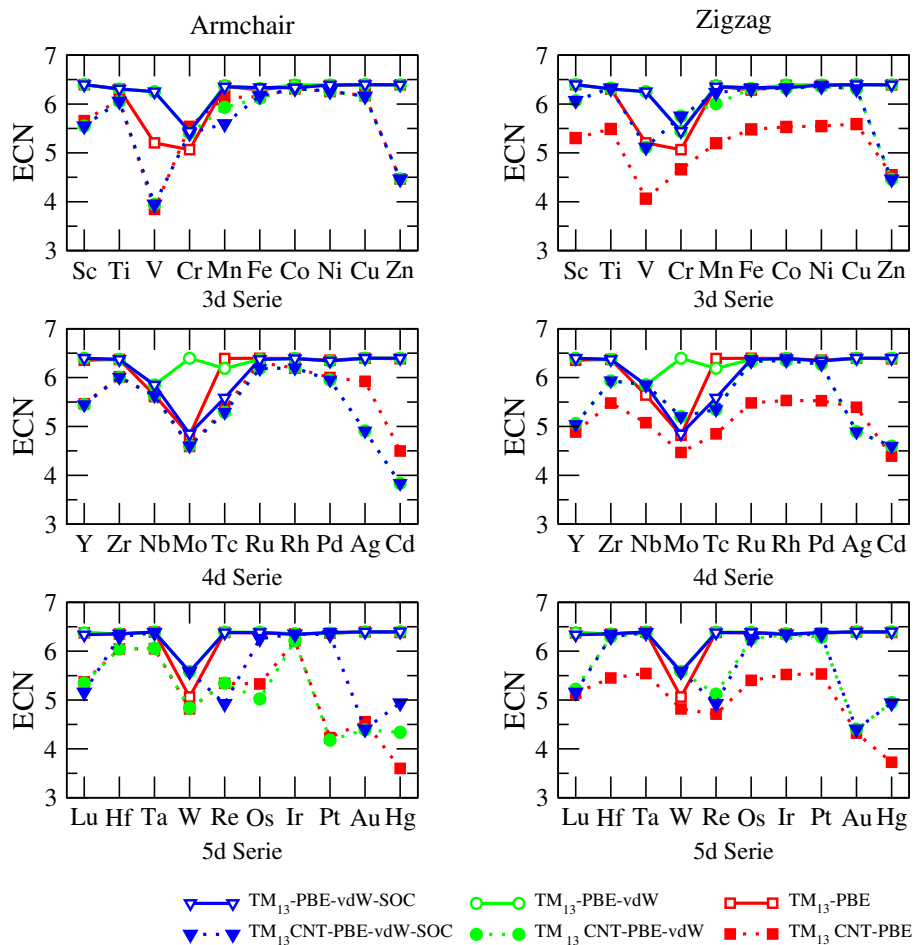

Figure 14: Effective Coordination Number, ECN, values for CNT fragments adhered to  $TM_{13}$  nanoclusters using three approaches, PBE, PBE-vdW, and PBE-vdW-SOC.

## E Vibrational Frequencies

**Table S1: 3d Series – 3N-6 vibrational frequencies for the 13-atom nanoclusters ( $\text{cm}^{-1}$ ), obtained by VASP.**

| $\nu(\text{Sc}_{13})$ | $\nu(\text{Ti}_{13})$ | $\nu(\text{V}_{13})$ | $\nu(\text{Cr}_{13})$ | $\nu(\text{Mn}_{13})$ | $\nu(\text{Fe}_{13})$ | $\nu(\text{Co}_{13})$ | $\nu(\text{Ni}_{13})$ | $\nu(\text{Cu}_{13})$ | $\nu(\text{Zn}_{13})$ |
|-----------------------|-----------------------|----------------------|-----------------------|-----------------------|-----------------------|-----------------------|-----------------------|-----------------------|-----------------------|
| 257.54                | 316.67                | 476.15               | 314.43                | 316.10                | 345.67                | 339.88                | 371.09                | 280.62                | 86.98                 |
| 256.90                | 315.66                | 464.68               | 313.18                | 253.02                | 298.64                | 321.84                | 364.41                | 280.47                | 85.21                 |
| 256.36                | 286.36                | 358.98               | 246.79                | 243.08                | 291.26                | 316.61                | 363.34                | 279.92                | 82.74                 |
| 202.96                | 261.93                | 342.97               | 198.46                | 232.11                | 258.13                | 286.51                | 265.09                | 214.59                | 82.33                 |
| 202.49                | 260.49                | 314.31               | 198.13                | 225.52                | 258.13                | 240.48                | 232.20                | 188.30                | 63.01                 |
| 202.16                | 257.52                | 308.48               | 196.17                | 221.23                | 232.48                | 228.91                | 230.62                | 188.18                | 61.98                 |
| 201.85                | 256.20                | 293.39               | 187.60                | 197.07                | 232.48                | 214.16                | 223.25                | 187.73                | 60.44                 |
| 201.68                | 217.13                | 280.50               | 185.31                | 193.72                | 224.29                | 208.47                | 219.16                | 187.58                | 47.92                 |
| 201.48                | 216.71                | 278.71               | 171.67                | 186.06                | 208.92                | 205.67                | 218.70                | 187.36                | 47.34                 |
| 183.94                | 212.31                | 276.18               | 171.32                | 181.31                | 200.17                | 183.83                | 184.57                | 157.35                | 47.02                 |
| 182.96                | 211.99                | 271.97               | 169.69                | 175.03                | 184.59                | 174.77                | 180.45                | 157.13                | 46.61                 |
| 182.83                | 196.20                | 271.48               | 163.74                | 172.06                | 181.09                | 169.44                | 176.56                | 156.66                | 46.24                 |
| 181.90                | 186.59                | 260.02               | 163.43                | 168.06                | 166.65                | 168.82                | 175.52                | 152.71                | 31.77                 |
| 181.31                | 184.48                | 259.79               | 160.45                | 154.67                | 163.16                | 158.52                | 169.31                | 152.55                | 31.52                 |
| 180.81                | 173.20                | 213.76               | 159.42                | 150.03                | 156.11                | 156.25                | 168.20                | 152.36                | 30.78                 |
| 180.61                | 171.55                | 193.87               | 157.00                | 148.93                | 153.37                | 155.16                | 165.03                | 152.08                | 29.83                 |
| 150.56                | 167.09                | 191.45               | 143.72                | 144.31                | 148.51                | 141.99                | 162.21                | 129.01                | 28.70                 |
| 150.32                | 165.98                | 178.30               | 143.30                | 136.96                | 144.15                | 120.63                | 158.09                | 128.82                | 26.89                 |
| 150.07                | 164.90                | 175.30               | 133.25                | 130.75                | 134.51                | 113.39                | 156.51                | 128.15                | 26.06                 |
| 149.56                | 164.37                | 168.79               | 124.96                | 126.33                | 132.74                | 97.77                 | 145.42                | 120.89                | 25.19                 |
| 149.19                | 160.57                | 163.64               | 124.29                | 118.35                | 126.75                | 95.63                 | 141.42                | 120.78                | 23.72                 |
| 148.85                | 158.89                | 162.78               | 120.34                | 113.97                | 120.80                | 86.12                 | 132.58                | 120.23                | 22.56                 |
| 148.38                | 139.96                | 138.94               | 119.60                | 108.10                | 106.75                | 82.71                 | 129.64                | 119.87                | 21.37                 |
| 145.34                | 138.63                | 127.41               | 109.22                | 105.59                | 103.67                | 75.36                 | 118.42                | 119.68                | 20.70                 |
| 144.61                | 138.25                | 93.20                | 105.68                | 96.44                 | 50.72                 | 67.32                 | 116.37                | 118.74                | 18.73                 |
| 144.29                | 135.93                | 91.08                | 104.89                | 93.32                 | 41.15                 | 60.11                 | 111.12                | 118.51                | 12.27                 |
| 143.96                | 117.50                | 89.02                | 102.44                | 74.53                 | 35.74                 | 27.77                 | 98.73                 | 118.23                | 10.62                 |
| 143.51                | 116.08                | 80.00                | 101.39                | 53.62                 | 30.57                 | 19.20                 | 97.140                | 117.42                | 8.78                  |
| 117.53                | 115.66                | 78.73                | 89.31                 | 47.70                 | 26.14                 | 16.59                 | 92.00                 | 87.48                 | 6.41                  |
| 117.05                | 113.23                | 58.26                | 88.70                 | 37.14                 | 11.23                 | 13.77                 | 82.07                 | 87.46                 | 1.87                  |
| 116.58                | 81.12                 | 54.80                | 81.55                 | 30.08                 | 9.44                  | 4.29                  | 80.72                 | 86.69                 | 4.32                  |
| 115.88                | 79.82                 | 10.14                | 77.82                 | 14.77                 | 12.39                 | 14.07                 | 73.18                 | 86.35                 | 5.11                  |
| 115.28                | 21.84                 | 7.57                 | 77.05                 | 48.57                 | 38.17                 | 22.28                 | 21.15                 | 85.66                 | 8.69                  |

**Table S2: 4d Series – 3N-6 vibrational frequencies for the 13-atom nanoclusters ( $\text{cm}^{-1}$ ), obtained by VASP.**

| $\nu(\text{Y}_{13})$ | $\nu(\text{Zr}_{13})$ | $\nu(\text{Nb}_{13})$ | $\nu(\text{Mo}_{13})$ | $\nu(\text{Tc}_{13})$ | $\nu(\text{Ru}_{13})$ | $\nu(\text{Rh}_{13})$ | $\nu(\text{Pd}_{13})$ | $\nu(\text{Ag}_{13})$ | $\nu(\text{Cd}_{13})$ |
|----------------------|-----------------------|-----------------------|-----------------------|-----------------------|-----------------------|-----------------------|-----------------------|-----------------------|-----------------------|
| 172.40               | 256.40                | 371.15                | 344.25                | 279.23                | 373.59                | 281.85                | 247.73                | 182.75                | 62.20                 |
| 171.86               | 255.97                | 358.81                | 343.93                | 248.08                | 340.78                | 268.48                | 246.76                | 181.94                | 60.94                 |
| 156.79               | 255.37                | 290.74                | 329.95                | 233.47                | 337.05                | 266.75                | 226.83                | 179.63                | 60.20                 |
| 133.66               | 192.24                | 261.97                | 305.80                | 231.62                | 326.87                | 226.57                | 183.89                | 137.50                | 55.74                 |
| 130.31               | 189.74                | 244.23                | 292.54                | 219.26                | 299.45                | 177.19                | 151.01                | 118.77                | 41.06                 |
| 129.16               | 189.68                | 239.43                | 292.51                | 217.56                | 270.44                | 170.38                | 145.67                | 118.02                | 40.60                 |
| 120.34               | 178.73                | 225.42                | 240.86                | 215.09                | 239.62                | 169.90                | 144.82                | 117.54                | 38.81                 |
| 119.25               | 178.69                | 221.63                | 237.76                | 211.55                | 230.34                | 162.52                | 133.98                | 117.28                | 31.75                 |
| 118.07               | 178.60                | 216.94                | 237.59                | 208.67                | 223.98                | 153.82                | 132.38                | 116.88                | 31.21                 |
| 117.41               | 170.56                | 215.32                | 236.17                | 176.32                | 214.71                | 153.52                | 117.37                | 99.42                 | 30.32                 |
| 111.56               | 170.12                | 212.33                | 201.96                | 169.04                | 209.37                | 134.46                | 116.58                | 98.59                 | 29.81                 |
| 109.08               | 169.83                | 209.77                | 201.80                | 166.20                | 202.35                | 132.82                | 115.79                | 97.70                 | 28.99                 |
| 106.12               | 159.82                | 204.64                | 195.82                | 165.64                | 187.82                | 132.44                | 102.69                | 91.61                 | 28.84                 |
| 103.60               | 158.09                | 200.25                | 195.41                | 160.34                | 179.10                | 130.79                | 101.32                | 91.00                 | 28.69                 |
| 98.17                | 142.05                | 171.05                | 182.80                | 159.53                | 157.99                | 130.20                | 100.73                | 89.90                 | 27.51                 |
| 97.16                | 141.70                | 154.21                | 182.71                | 135.84                | 147.77                | 122.50                | 99.90                 | 89.44                 | 27.19                 |
| 96.03                | 141.52                | 144.28                | 174.94                | 134.84                | 143.62                | 119.29                | 96.97                 | 78.82                 | 25.67                 |
| 95.21                | 138.27                | 135.90                | 155.73                | 133.37                | 119.61                | 116.71                | 95.31                 | 78.54                 | 25.06                 |
| 93.93                | 138.17                | 125.01                | 154.88                | 126.75                | 104.03                | 111.02                | 93.65                 | 75.67                 | 23.85                 |
| 91.76                | 132.77                | 124.71                | 133.05                | 120.32                | 60.33                 | 110.50                | 92.82                 | 73.83                 | 23.21                 |
| 91.33                | 132.67                | 117.86                | 124.97                | 118.05                | 53.24                 | 108.30                | 91.22                 | 73.37                 | 22.62                 |
| 90.93                | 132.60                | 111.10                | 124.86                | 107.23                | 18.69                 | 107.77                | 90.87                 | 73.00                 | 21.32                 |
| 79.03                | 95.94                 | 110.05                | 120.42                | 87.77                 | 82.79                 | 102.26                | 84.03                 | 72.37                 | 20.50                 |
| 78.53                | 95.64                 | 93.97                 | 119.23                | 73.84                 | 116.45                | 101.86                | 80.52                 | 71.29                 | 20.14                 |
| 73.34                | 89.00                 | 84.03                 | 114.97                | 72.32                 | 129.41                | 95.19                 | 74.04                 | 68.62                 | 19.64                 |
| 72.26                | 88.85                 | 74.14                 | 114.84                | 62.51                 | 143.30                | 94.77                 | 73.34                 | 68.58                 | 18.70                 |
| 69.64                | 88.23                 | 73.06                 | 83.44                 | 60.56                 | 194.55                | 87.68                 | 71.32                 | 67.71                 | 18.16                 |
| 67.14                | 80.99                 | 60.05                 | 82.58                 | 55.68                 | 204.22                | 86.94                 | 65.41                 | 67.05                 | 16.65                 |
| 66.77                | 80.51                 | 52.10                 | 55.01                 | 53.96                 | 223.61                | 68.96                 | 62.61                 | 49.13                 | 14.42                 |
| 65.26                | 80.20                 | 51.49                 | 54.42                 | 49.69                 | 287.60                | 68.59                 | 60.97                 | 48.68                 | 14.32                 |
| 60.63                | 76.53                 | 42.20                 | 39.05                 | 46.22                 | 296.48                | 62.68                 | 60.41                 | 46.86                 | 11.73                 |
| 55.87                | 73.30                 | 19.05                 | 37.76                 | 42.79                 | 346.77                | 38.00                 | 52.52                 | 46.61                 | 9.84                  |
| 36.44                | 71.34                 | 12.88                 | 11.13                 | 13.68                 | 370.15                | 36.55                 | 48.04                 | 45.27                 | 8.23                  |

**Table S3: 5d Series – 3N-6 vibrational frequencies for the 13-atom nanoclusters ( $\text{cm}^{-1}$ ), obtained by VASP.**

| $\nu(\text{Lu}_{13})$ | $\nu(\text{Hf}_{13})$ | $\nu(\text{Ta}_{13})$ | $\nu(\text{W}_{13})$ | $\nu(\text{Re}_{13})$ | $\nu(\text{Os}_{13})$ | $\nu(\text{Ir}_{13})$ | $\nu(\text{Pt}_{13})$ | $\nu(\text{Au}_{13})$ | $\nu(\text{Hg}_{13})$ |
|-----------------------|-----------------------|-----------------------|----------------------|-----------------------|-----------------------|-----------------------|-----------------------|-----------------------|-----------------------|
| 147.60                | 205.54                | 264.30                | 259.07               | 226.65                | 273.45                | 253.54                | 228.60                | 163.65                | 39.18                 |
| 130.54                | 183.59                | 263.06                | 249.58               | 212.15                | 272.79                | 243.61                | 225.16                | 163.36                | 34.49                 |
| 123.67                | 150.52                | 258.42                | 234.91               | 203.87                | 255.75                | 229.83                | 224.90                | 162.95                | 33.80                 |
| 101.55                | 145.52                | 189.35                | 229.21               | 203.56                | 227.99                | 200.97                | 168.31                | 127.31                | 32.11                 |
| 96.62                 | 135.15                | 168.97                | 220.55               | 178.05                | 167.86                | 153.29                | 129.59                | 104.38                | 30.94                 |
| 95.16                 | 131.95                | 167.68                | 213.22               | 168.76                | 167.76                | 144.50                | 123.74                | 103.47                | 30.41                 |
| 93.63                 | 124.75                | 164.13                | 189.04               | 168.01                | 167.43                | 143.09                | 123.37                | 103.42                | 30.09                 |
| 90.62                 | 121.16                | 153.72                | 180.72               | 162.24                | 166.75                | 137.42                | 113.17                | 102.19                | 29.64                 |
| 89.88                 | 114.75                | 152.79                | 178.57               | 161.40                | 163.06                | 134.60                | 112.82                | 101.71                | 28.77                 |
| 83.48                 | 111.90                | 149.82                | 170.32               | 138.64                | 152.31                | 132.87                | 103.88                | 82.68                 | 26.46                 |
| 82.00                 | 107.07                | 135.53                | 165.63               | 130.40                | 149.16                | 131.80                | 103.50                | 82.26                 | 26.00                 |
| 80.39                 | 106.31                | 130.87                | 165.51               | 129.43                | 148.51                | 122.25                | 100.99                | 81.35                 | 25.11                 |
| 75.93                 | 103.98                | 128.77                | 143.66               | 118.48                | 140.32                | 121.20                | 88.74                 | 78.10                 | 23.30                 |
| 72.44                 | 100.44                | 118.25                | 138.82               | 115.38                | 139.60                | 120.84                | 88.36                 | 75.74                 | 21.59                 |
| 70.76                 | 96.74                 | 116.26                | 132.42               | 114.94                | 135.58                | 120.12                | 85.17                 | 75.21                 | 20.53                 |
| 67.49                 | 94.25                 | 114.83                | 125.74               | 114.80                | 135.10                | 119.69                | 82.81                 | 74.49                 | 18.04                 |
| 65.79                 | 93.55                 | 108.55                | 123.93               | 113.68                | 128.04                | 115.61                | 82.53                 | 65.10                 | 16.80                 |
| 61.34                 | 87.24                 | 108.07                | 121.18               | 113.28                | 111.46                | 112.87                | 81.94                 | 64.55                 | 15.25                 |
| 57.89                 | 85.59                 | 107.23                | 119.92               | 101.81                | 108.23                | 97.76                 | 81.18                 | 63.27                 | 14.83                 |
| 56.43                 | 81.20                 | 102.09                | 115.62               | 63.53                 | 107.61                | 96.43                 | 80.47                 | 61.98                 | 14.30                 |
| 54.45                 | 80.21                 | 99.67                 | 109.16               | 62.18                 | 79.59                 | 93.74                 | 76.61                 | 61.69                 | 12.63                 |
| 50.02                 | 78.11                 | 94.07                 | 105.78               | 62.00                 | 78.77                 | 92.98                 | 76.44                 | 60.92                 | 10.87                 |
| 36.57                 | 75.92                 | 92.64                 | 99.62                | 56.07                 | 57.85                 | 90.78                 | 73.56                 | 59.89                 | 7.86                  |
| 25.81                 | 69.29                 | 89.18                 | 94.77                | 53.86                 | 56.91                 | 79.53                 | 73.30                 | 58.57                 | 4.72                  |
| 22.96                 | 68.68                 | 87.55                 | 91.34                | 47.99                 | 52.19                 | 75.15                 | 72.40                 | 55.65                 | 3.25                  |
| 20.10                 | 61.41                 | 79.13                 | 89.76                | 6.26                  | 50.00                 | 73.74                 | 71.76                 | 54.52                 | 3.54                  |
| 12.10                 | 56.92                 | 72.41                 | 81.85                | 4.21                  | 49.53                 | 72.92                 | 67.53                 | 49.71                 | 8.37                  |
| 5.74                  | 47.40                 | 72.07                 | 80.21                | 2.03                  | 48.58                 | 71.52                 | 65.09                 | 48.50                 | 9.76                  |
| 4.46                  | 40.56                 | 71.31                 | 41.54                | 1.77                  | 44.75                 | 61.00                 | 64.68                 | 43.61                 | 11.96                 |
| 14.14                 | 3.36                  | 70.64                 | 34.91                | 3.11                  | 30.84                 | 59.76                 | 59.18                 | 40.68                 | 16.02                 |
| 20.25                 | 1.05                  | 69.59                 | 20.75                | 5.11                  | 28.52                 | 56.43                 | 57.20                 | 36.90                 | 17.17                 |
| 37.63                 | 0.76                  | 58.57                 | 7.28                 | 35.49                 | 21.20                 | 50.72                 | 54.62                 | 34.14                 | 18.09                 |
| 52.07                 | 5.16                  | 44.22                 | 6.26                 | 40.38                 | 16.22                 | 50.28                 | 53.77                 | 32.86                 | 19.68                 |

## F Coefficients of Linear Regression

Below, are provided the equations and coefficients for the linear regressions employed in Figure 5(b) for the data of the adhesion energy in relation to the center of gravity of the occupied  $d$ -states for the cases armchair and zigzag, respectively.

For  $3d$  systems:

$$y = -2.3231 - (0.18311)x, \quad (1)$$

where the regression constant is given by  $-2.3231$ , the regression coefficient is given by  $-0.18311$ , and the correlation coefficient is  $-0.71889$ .

$$y = -2.8253 - (0.22654)x, \quad (2)$$

where the regression constant is given by  $-2.8253$ , the regression coefficient is given by  $-0.22654$ , and the correlation coefficient is  $-0.72854$ .

For  $4d$  systems:

$$y = -2.5104 - (0.25748)x, \quad (3)$$

where the regression constant is given by  $-2.5104$ , the regression coefficient is given by  $-0.25748$ , and the correlation coefficient is  $-0.83333$ .

$$y = -3.0913 - (0.30573)x, \quad (4)$$

where the regression constant is given by  $-3.0913$ , the regression coefficient is given by  $-0.30573$ , and the correlation coefficient is  $-0.85111$ .

For  $5d$  systems:

$$y = -3.4059 - (0.56161)x, \quad (5)$$

where the regression constant is given by  $-3.4059$ , the regression coefficient is given by  $-0.56161$ ,



and the correlation coefficient is  $-0.75884$ .

$$y = -3.4651 - (0.46446)x, \quad (6)$$

where the regression constant is given by  $-3.4651$ , the regression coefficient is given by  $-0.46446$ , and the correlation coefficient is  $-0.795399$ . And, where  $y$  represents the adhesion energy values, while  $x$  represents the values for the center of gravity of the occupied  $d$ -states.

## G Atomic Positions

Below we provided the atomic positions (xyz coordinates) for the  $\text{TM}_{13}$  nanoclusters composed by all  $3d$ ,  $4d$ , and  $5d$  elements obtained by DFT-PBE as implemented in VASP.

|                                  |                                |
|----------------------------------|--------------------------------|
| 13Sc                             | Ti 4.325710 2.815981 14.117537 |
| Sc 15.573111 14.509049 45.215668 | Ti 1.794512 4.006123 14.034704 |
| Sc 15.032967 17.267918 46.663231 | Ti 1.319422 5.202412 16.518650 |
| Sc 17.893135 15.928914 46.829731 | Ti 3.556709 4.752739 18.137171 |
| Sc 13.879761 16.750488 43.763798 | Ti 5.415524 3.277666 16.653826 |
| Sc 18.508657 14.584298 44.033699 | Ti 3.894035 5.280594 15.397282 |
| Sc 16.026739 15.093502 42.138474 |                                |
| Sc 16.829241 17.070650 44.258900 | 13V                            |
| Sc 18.625513 16.873375 41.854572 | V 1.797556 1.222236 17.176781  |
| Sc 15.765346 18.212387 41.688080 | V 1.352398 3.118034 18.319431  |
| Sc 15.149823 19.556992 44.484100 | V 3.754176 2.290921 18.445799  |
| Sc 17.631742 19.047789 46.379333 | V 0.348659 2.976711 15.985495  |
| Sc 19.778719 17.390800 44.754013 | V 4.349717 1.295218 16.081388  |
| Sc 18.085369 19.632250 43.302143 | V 2.112471 1.745346 14.464012  |
|                                  | V 2.829241 3.070650 16.258900  |
|                                  | V 4.306083 3.023266 14.198380  |
| 13Ti                             | V 1.904304 3.850370 14.072011  |
| Ti 1.764445 0.860696 17.120520   | V 1.308764 4.846072 16.436420  |
| Ti 1.332771 3.325319 18.400263   | V 3.546009 4.395953 18.053799  |
| Ti 3.863968 2.135168 18.483107   | V 5.309819 3.164578 16.532316  |
| Ti 0.242956 2.863634 15.863985   | V 3.860926 4.919064 15.341030  |
| Ti 4.339058 0.938878 15.999160   |                                |
| Ti 2.101772 1.388562 14.380638   | 13Cr                           |
| Ti 2.829241 3.070650 16.258900   |                                |

Cr 1.741287 0.820800 17.136179  
Cr 1.772523 3.019865 18.404276  
Cr 3.870344 2.059238 18.474333  
Cr 0.583408 2.519146 15.644621  
Cr 3.854527 0.908670 16.210163  
Cr 2.116882 1.320255 14.403274  
Cr 2.829241 3.070650 16.258900  
Cr 3.885958 3.121435 14.113536  
Cr 1.788136 4.082050 14.043477  
Cr 1.803953 5.232620 16.307648  
Cr 3.541599 4.821035 18.114527  
Cr 5.075071 3.622154 16.873192  
Cr 3.917192 5.320499 15.381630

13Mn

Mn 1.826965 0.927728 17.062946  
Mn 1.395539 3.250250 18.293571  
Mn 3.808932 2.123114 18.351696  
Mn 0.374510 2.800215 15.879389  
Mn 4.198662 0.990378 16.081244  
Mn 2.076768 1.407084 14.552559  
Mn 2.829241 3.070650 16.258900  
Mn 4.262941 2.891041 14.224237  
Mn 1.849546 4.018174 14.166112  
Mn 1.459818 5.150921 16.436565  
Mn 3.581713 4.734205 17.965240  
Mn 5.283969 3.341076 16.638420

Mn 3.831515 5.213573 15.454862

13Fe

Fe 1.876347 1.064895 17.036047  
Fe 1.571284 3.199188 18.220362  
Fe 3.737084 2.112564 18.275211  
Fe 0.548517 2.911286 15.902571  
Fe 4.152136 1.066619 16.083153  
Fe 2.249460 1.494137 14.639601  
Fe 2.829241 3.070650 16.258900  
Fe 4.087196 2.942112 14.297450  
Fe 1.921395 4.028726 14.242599  
Fe 1.506344 5.074670 16.434656  
Fe 3.409019 4.647153 17.878208  
Fe 5.109963 3.230016 16.615229  
Fe 3.782134 5.076404 15.481752

13Co

Co 1.918964 1.099601 17.020098  
Co 1.503334 3.217010 18.136469  
Co 3.688953 2.170536 18.192514  
Co 0.559999 2.830956 15.938990  
Co 4.084167 1.152292 16.071388  
Co 2.173500 1.550488 14.660158  
Co 2.829241 3.070650 16.258900  
Co 4.155146 2.924281 14.381340  
Co 1.969528 3.970753 14.325294

Co 1.574313 4.988999 16.446423  
Co 3.484980 4.590800 17.857651  
Co 5.098482 3.310334 16.578821  
Co 3.739516 5.041699 15.497713

13Ni

Ni 1.870635 1.075781 17.003710  
Ni 1.474660 3.218130 18.123793  
Ni 3.702328 2.171648 18.199493  
Ni 0.531368 2.825674 15.952351  
Ni 4.127718 1.140551 16.077236  
Ni 2.167068 1.532602 14.668083  
Ni 2.829241 3.070650 16.258900  
Ni 4.183821 2.923161 14.394016  
Ni 1.956151 3.969643 14.318316  
Ni 1.530762 5.000750 16.440565  
Ni 3.491411 4.608688 17.849728  
Ni 5.127111 3.315617 16.565460  
Ni 3.787846 5.065508 15.514100

13Cu

Cu 1.843101 1.024241 17.052980  
Cu 1.445873 3.233137 18.221291  
Cu 3.735140 2.156727 18.291784  
Cu 0.459051 2.819298 15.929066  
Cu 4.161604 1.078519 16.044737  
Cu 2.136553 1.488360 14.583416

Cu 2.829241 3.070650 16.258900  
Cu 4.212606 2.908163 14.296520  
Cu 1.923341 3.984564 14.226027  
Cu 1.496877 5.062780 16.473064  
Cu 3.521927 4.652929 17.934395  
Cu 5.199429 3.322002 16.588734  
Cu 3.815380 5.117058 15.464828

13Zn

Zn 15.613031 14.582300 45.220119  
Zn 15.155750 17.277468 46.656151  
Zn 17.930935 15.953722 46.717453  
Zn 13.956667 16.755901 43.865921  
Zn 18.457611 14.646111 44.012657  
Zn 16.002718 15.153851 42.222565  
Zn 16.829241 17.070650 44.258900  
Zn 18.502729 16.863831 41.861649  
Zn 15.727545 18.187569 41.800354  
Zn 15.200870 19.495180 44.505154  
Zn 17.655762 18.987440 46.295246  
Zn 19.701813 17.385399 44.651894  
Zn 18.045448 19.559000 43.297684

13Y

Y 15.401808 14.260170 45.357994  
Y 14.870461 17.238934 46.901436  
Y 18.024090 15.791150 47.102673

Y 13.553255 16.732788 43.702877  
Y 18.615765 14.367111 44.092018  
Y 15.847326 14.938393 41.977997  
Y 16.829241 17.070650 44.258900  
Y 18.788019 16.902357 41.616375  
Y 15.634388 18.350140 41.415127  
Y 15.042715 19.774189 44.425789  
Y 17.811153 19.202898 46.539814  
Y 20.105225 17.408510 44.814934  
Y 18.256672 19.881119 43.159817

#### 13Zr

Zr 15.726022 14.601047 45.235023  
Zr 15.281343 17.238482 46.673374  
Zr 17.982533 16.049944 46.685009  
Zr 13.979683 16.765099 43.979790  
Zr 18.478878 14.737920 43.982826  
Zr 15.956647 15.118980 42.340508  
Zr 16.829241 17.070650 44.258900  
Zr 18.377136 16.902809 41.844425  
Zr 15.675945 18.091356 41.832802  
Zr 15.179603 19.403370 44.534985  
Zr 17.701832 19.022308 46.177299  
Zr 19.678799 17.376190 44.538025  
Zr 17.932457 19.540243 43.282776

#### 13Nb

Nb 1.955189 0.765452 17.177849  
Nb 1.506698 3.414155 18.462234  
Nb 3.947956 2.125410 18.661104  
Nb 0.318036 2.794139 15.585135  
Nb 4.204030 0.731161 16.113928  
Nb 2.055499 1.217696 14.292299  
Nb 2.829241 3.070650 16.258900  
Nb 4.151781 2.727145 14.055577  
Nb 1.710523 4.015890 13.856705  
Nb 1.454451 5.410129 16.403881  
Nb 3.602983 4.923594 18.225510  
Nb 5.340445 3.347150 16.932674  
Nb 3.703292 5.375838 15.339962

#### 13Mo

Mo 1.583369 1.213589 17.496473  
Mo 1.293741 3.268596 18.464220  
Mo 3.828495 2.003983 18.519220  
Mo 0.180972 2.739843 15.891587  
Mo 4.696484 1.318437 16.120552  
Mo 1.987694 1.864629 14.163525  
Mo 2.829241 3.070650 16.258909  
Mo 4.364739 2.872695 14.053591  
Mo 1.829985 4.137316 13.998590  
Mo 0.961997 4.822864 16.397259  
Mo 3.670787 4.276670 18.354284  
Mo 5.477508 3.401447 16.626223

Mo 4.075111 4.927702 15.021337

### 13Tc

Tc 1.785566 0.913878 16.964779

Tc 1.384734 3.144228 18.292597

Tc 3.785583 2.061313 18.330450

Tc 0.375665 2.762840 15.893310

Tc 4.211382 1.014741 15.952818

Tc 2.076378 1.484744 14.480581

Tc 2.829241 3.070650 16.258900

Tc 4.273746 2.997064 14.225204

Tc 1.872896 4.079988 14.187359

Tc 1.447098 5.126560 16.564993

Tc 3.582101 4.656558 18.037220

Tc 5.282815 3.378458 16.624502

Tc 3.872914 5.227413 15.553031

### 13Ru

Ru 1.810577 0.953741 17.078320

Ru 1.398935 3.236650 18.287939

Ru 3.766413 2.125834 18.361305

Ru 0.378717 2.809620 15.916809

Ru 4.209160 1.012414 16.035847

Ru 2.115694 1.435125 14.525001

Ru 2.829241 3.070650 16.258900

Ru 4.259544 2.904650 14.229872

Ru 1.892067 4.015467 14.156506

Ru 1.449320 5.128887 16.481964

Ru 3.542788 4.706165 17.992800

Ru 5.279762 3.331669 16.601002

Ru 3.847902 5.187550 15.439489

### 13Rh

Rh 1.770290 0.906867 17.096741

Rh 1.352438 3.241144 18.331333

Rh 3.803007 2.107885 18.410538

Rh 0.341344 2.807693 15.913357

Rh 4.254072 0.967326 16.034092

Rh 2.081480 1.396321 14.486344

Rh 2.829241 3.070650 16.258900

Rh 4.306042 2.900146 14.186476

Rh 1.855472 4.033403 14.107270

Rh 1.404407 5.173964 16.483707

Rh 3.577000 4.744968 18.031466

Rh 5.317137 3.333607 16.604454

Rh 3.888189 5.234434 15.421070

### 13Pd

Pd 1.802619 0.857786 17.100548

Pd 1.369305 3.271552 18.377987

Pd 3.851259 2.051017 18.535173

Pd 0.289368 2.819088 15.871176

Pd 4.316933 0.835297 16.023804

Pd 2.060909 1.299197 14.377547

Pd 2.829241 3.070650 16.258900  
Pd 4.289175 2.869748 14.139823  
Pd 1.807222 4.090283 13.982635  
Pd 1.341547 5.305994 16.494005  
Pd 3.597571 4.842103 18.140253  
Pd 5.369113 3.322203 16.646624  
Pd 3.855860 5.283502 15.417262

13Ag

Ag 1.693363 0.713115 17.177256  
Ag 1.235139 3.258416 18.519484  
Ag 3.874346 2.018173 18.603975  
Ag 0.097535 2.780386 15.877230  
Ag 4.365759 0.775149 16.011986  
Ag 2.031623 1.246666 14.327800  
Ag 2.829241 3.070650 16.258900  
Ag 4.423341 2.882884 13.998325  
Ag 1.784135 4.123127 13.913833  
Ag 1.292720 5.366142 16.505823  
Ag 3.626857 4.894634 18.190002  
Ag 5.560946 3.360905 16.640572  
Ag 3.965116 5.428173 15.340555

13Cd

Cd 15.491232 14.217154 45.362099  
Cd 14.901931 17.310989 46.957932  
Cd 18.067699 15.816149 47.098209

Cd 13.562712 16.723227 43.807278  
Cd 18.671921 14.312493 43.965836  
Cd 15.843655 14.896830 41.922211  
Cd 16.829241 17.070650 44.258900  
Cd 18.756550 16.830303 41.559875  
Cd 15.590779 18.325142 41.419601  
Cd 14.986558 19.828796 44.551964  
Cd 17.814825 19.244469 46.595596  
Cd 20.095766 17.418064 44.710533  
Cd 18.167248 19.924137 43.155701

13Lu

Lu 15.509009 14.334886 45.325592  
Lu 15.028469 17.307636 46.903816  
Lu 18.017714 15.888572 46.996841  
Lu 13.664433 16.725458 43.809113  
Lu 18.612816 14.408911 43.953571  
Lu 15.935969 14.991356 41.982361  
Lu 16.829241 17.070650 44.258900  
Lu 18.630011 16.833654 41.613983  
Lu 15.640767 18.252720 41.520966  
Lu 15.045666 19.732380 44.564240  
Lu 17.722507 19.149944 46.535446  
Lu 19.994038 17.415831 44.708694  
Lu 18.149471 19.806406 43.192219

13Hf

Hf 1.751569 0.616608 17.193586  
Hf 1.185114 3.250811 18.620527  
Hf 3.910840 1.997761 18.638565  
Hf 0.039526 2.795283 15.833562  
Hf 4.426395 0.747033 16.028690  
Hf 1.961253 1.190651 14.309428  
Hf 2.829241 3.070650 16.258900  
Hf 4.473366 2.890479 13.897281  
Hf 1.747640 4.143528 13.879242  
Hf 1.232084 5.394256 16.489107  
Hf 3.697227 4.950638 18.208382  
Hf 5.618955 3.346006 16.684248  
Hf 3.906913 5.524692 15.324223

13Ta

Ta 1.749016 0.792551 17.153765  
Ta 1.306735 3.218107 18.443558  
Ta 3.852903 2.056203 18.509163  
Ta 0.196890 2.784676 15.888012  
Ta 4.341715 0.874627 16.022974  
Ta 2.055807 1.334013 14.377567  
Ta 2.829241 3.070650 16.258900  
Ta 4.351747 2.923183 14.074252  
Ta 1.805576 4.085098 14.008636  
Ta 1.316763 5.266664 16.494839  
Ta 3.602672 4.807287 18.140244  
Ta 5.461590 3.356624 16.629797

Ta 3.909464 5.348740 15.364045

13W

W 1.763111 0.844016 16.596569  
W 1.183544 3.678853 18.184534  
W 4.239252 2.256481 18.299009  
W 0.140382 2.790166 15.915057  
W 4.350499 0.827278 16.071877  
W 2.137804 1.442969 14.252605  
W 2.829241 3.070650 16.258900  
W 4.474936 2.462438 14.333277  
W 1.419228 3.884820 14.218801  
W 1.307981 5.314011 16.445934  
W 3.520675 4.698332 18.265194  
W 5.518097 3.351125 16.602753  
W 3.895370 5.297272 15.921241

13Re

Re 1.772691 0.932615 17.085619  
Re 1.355021 3.197802 18.303844  
Re 3.770651 2.098066 18.389643  
Re 0.341689 2.786467 15.937973  
Re 4.242039 0.993005 16.016602  
Re 2.103903 1.418452 14.493593  
Re 2.829241 3.070650 16.258900  
Re 4.303459 2.943489 14.213965  
Re 1.887829 4.043234 14.128167



Re 1.416441 5.148285 16.501209  
Re 3.554577 4.722847 18.024218  
Re 5.316792 3.354834 16.579836  
Re 3.885790 5.208685 15.432191

### 13Os

Os 1.799990 0.919783 16.980900  
Os 1.373044 3.175949 18.277294  
Os 3.781340 2.047562 18.353119  
Os 0.375686 2.791582 15.932438  
Os 4.217699 1.027874 15.934926  
Os 2.132528 1.466787 14.485730  
Os 2.829241 3.070650 16.258900  
Os 4.285435 2.965351 14.240506  
Os 1.877141 4.093729 14.164690  
Os 1.440782 5.113426 16.582884  
Os 3.525953 4.674513 18.032080  
Os 5.282795 3.349709 16.585373  
Os 3.858490 5.221506 15.536909

### 13Ir

Ir 1.743530 0.910083 17.081564  
Ir 1.398579 3.253578 18.323902  
Ir 3.781206 2.120880 18.447672  
Ir 0.315235 2.763302 15.927875  
Ir 4.248970 0.947266 15.988401  
Ir 2.129288 1.423766 14.485948

Ir 2.829241 3.070650 16.258909  
Ir 4.259901 2.887722 14.193896  
Ir 1.877274 4.020420 14.070139  
Ir 1.409510 5.194035 16.529409  
Ir 3.529194 4.717533 18.031864  
Ir 5.343245 3.377989 16.589926  
Ir 3.914949 5.231218 15.436245

### 13Pt

Pt 1.741196 0.797160 17.151423  
Pt 1.282700 3.250320 18.433996  
Pt 3.779924 2.073374 18.434095  
Pt 0.288773 2.805815 15.936985  
Pt 4.303999 0.853759 16.012568  
Pt 2.111660 1.359308 14.474168  
Pt 2.829241 3.070650 16.258900  
Pt 4.375780 2.890980 14.083816  
Pt 1.878556 4.067915 14.083715  
Pt 1.354481 5.287542 16.505243  
Pt 3.546822 4.781992 18.043633  
Pt 5.369707 3.335485 16.580824  
Pt 3.917284 5.344130 15.366386

### 13Au

Au 1.695486 0.718107 17.174358  
Au 1.238760 3.258039 18.514912  
Au 3.871570 2.020387 18.598520

|                                  |                                  |
|----------------------------------|----------------------------------|
| Au 0.103180 2.781791 15.878147   | Hg 14.785282 17.278782 47.135361 |
| Au 4.362361 0.780302 16.012331   | Hg 18.066395 15.692934 47.243172 |
| Au 2.032915 1.250703 14.332340   | Hg 13.360032 16.667980 43.717964 |
| Au 2.829241 3.070650 16.258900   | Hg 18.839947 14.204887 43.964565 |
| Au 4.419720 2.883252 14.002897   | Hg 15.880189 14.746624 41.795990 |
| Au 1.786909 4.120901 13.919290   | Hg 16.829241 17.070650 44.258900 |
| Au 1.296120 5.360989 16.505482   | Hg 18.873198 16.862509 41.382446 |
| Au 3.625564 4.890585 18.185457   | Hg 15.592085 18.448357 41.274643 |
| Au 5.555298 3.359500 16.639662   | Hg 14.818533 19.936413 44.553246 |
| Au 3.962994 5.423183 15.343442   | Hg 17.778292 19.394667 46.721825 |
|                                  | Hg 20.298447 17.473320 44.799835 |
| 13Hg                             | Hg 18.285179 20.078024 43.147881 |
| Hg 15.373301 14.063266 45.369926 |                                  |

Here, we provided the atomic positions (xyz coordinates) of the five-layered hydrogen-terminated fragment for the (3,3) armchair CNT and tree-layered hydrogen terminated fragment for the (5,0) zigzag CNT.

|                                 |                                 |
|---------------------------------|---------------------------------|
| 6H60C                           | C 11.965842 14.823107 23.031551 |
| H 12.990671 16.482792 22.150349 | C 12.964539 12.049039 23.035122 |
| H 11.377527 14.559064 22.151907 | C 14.296043 11.816928 23.032227 |
| H 15.811480 16.000870 22.155907 | C 15.019041 15.785959 24.245264 |
| H 16.664545 13.638066 22.149296 | C 13.654816 16.025560 24.244669 |
| H 14.816623 11.433596 22.153572 | C 11.946513 13.987636 24.245405 |
| H 12.342887 11.864201 22.158146 | C 12.414574 12.683718 24.246574 |
| C 16.197315 14.083983 23.028267 | C 15.033370 12.228002 24.241488 |
| C 15.739350 15.355471 23.032410 | C 15.925013 13.288244 24.239681 |
| C 12.834482 15.858871 23.031147 | C 12.958774 15.802435 25.509983 |

C 12.039211 14.713631 25.510063  
C 12.958396 12.195615 25.511845  
C 14.361697 11.945552 25.509199  
C 16.081467 13.999550 25.507187  
C 15.598701 15.340347 25.509975  
C 11.875502 14.003374 26.740860  
C 12.375134 12.634405 26.741991  
C 15.059645 12.158177 26.738895  
C 15.996448 13.273837 26.737391  
C 15.064188 15.836010 26.740408  
C 13.629377 16.089867 26.739864  
C 12.951131 12.179621 27.965929  
C 14.363729 11.928532 27.964392  
C 16.104124 13.999462 27.962151  
C 15.612400 15.347111 27.964077  
C 12.947440 15.821337 27.964439  
C 12.024780 14.722836 27.965065  
C 15.042103 12.206024 29.213902  
C 15.951624 13.282764 29.212879  
C 15.031639 15.796198 29.213131  
C 13.644950 16.044909 29.214485  
C 11.929921 13.997780 29.215483  
C 12.409157 12.673388 29.215763  
C 16.087456 14.000046 30.466311  
C 15.604367 15.342879 30.466034  
C 12.955603 15.809819 30.467752  
C 12.031910 14.721813 30.468777

C 12.958300 12.194541 30.468481  
C 14.362204 11.939629 30.467365  
C 15.068205 15.839485 31.697477  
C 13.631250 16.091640 31.699409  
C 11.870314 14.009599 31.700096  
C 12.373087 12.639159 31.699368  
C 15.058787 12.155328 31.698448  
C 15.995335 13.273579 31.698280  
C 12.892574 15.868074 32.940254  
C 11.967019 14.778214 32.941734  
C 12.936307 12.111248 32.939430  
C 14.344888 11.853176 32.939610  
C 16.169798 14.025865 32.938042  
C 15.687441 15.373191 32.938465  
C 11.874907 13.887639 34.035690  
C 12.279797 12.711883 34.041176  
C 15.160780 12.223937 34.031120  
C 15.986185 13.154640 34.040798  
C 14.957137 15.889886 34.031219  
C 13.740182 16.146866 34.042328

60C5H

H 12.308657 15.218826 34.236565  
H 14.619741 15.920985 34.252598  
H 16.046104 13.970243 34.252026  
H 12.317490 12.802344 34.232544  
H 14.622478 12.020251 34.241112

C 15.476085 13.557748 21.892653  
C 15.173874 14.846399 22.392008  
C 14.045584 15.546910 21.896261  
C 13.199739 16.306187 22.685364  
C 12.606986 15.340456 21.792526  
C 12.134322 14.105618 22.426807  
C 12.521301 12.933456 21.796650  
C 13.498232 12.177697 22.421911  
C 14.822956 12.250509 21.802063  
C 15.922740 12.516397 22.686781  
C 15.491716 15.075755 23.835951  
C 14.631948 15.970232 24.630581  
C 13.293814 16.203629 24.053934  
C 12.301275 15.323949 24.676132  
C 12.065317 14.111676 23.876152  
C 12.485022 12.902663 24.578049  
C 13.483635 12.105588 23.871828  
C 14.712472 11.970904 24.675518  
C 15.852235 12.638285 24.057665  
C 16.063469 13.974756 24.634140  
C 14.661940 15.953660 26.041895  
C 13.387817 16.002209 26.779751  
C 12.341755 15.255700 26.067022  
C 11.995646 14.026507 26.756886  
C 12.426699 12.863412 26.004618  
C 13.386462 12.081889 26.762136  
C 14.659212 12.034136 26.069868

C 15.695055 12.786779 26.782581  
C 16.055717 14.009071 26.044453  
C 15.648654 15.189219 26.771780  
C 13.385205 15.983572 28.175634  
C 12.362549 15.216206 28.889875  
C 11.968488 14.015409 28.162954  
C 12.354555 12.815924 28.888700  
C 13.368667 12.063747 28.167238  
C 14.632181 12.059037 28.895681  
C 15.680663 12.787852 28.179167  
C 16.048822 13.997813 28.907326  
C 15.661220 15.196602 28.181757  
C 14.648076 15.941541 28.905760  
C 12.343300 15.220798 30.294695  
C 11.980351 14.011977 31.015491  
C 12.331176 12.800467 30.292553  
C 13.370361 12.090502 31.020828  
C 14.630703 12.043246 30.299532  
C 15.636142 12.800004 31.030943  
C 16.063412 13.991625 30.311844  
C 15.630648 15.168930 31.037195  
C 14.648252 15.950805 30.312002  
C 13.384755 15.921289 31.028625  
C 11.943686 14.009513 32.438950  
C 12.377751 12.841606 33.143414  
C 13.356668 12.063611 32.445671  
C 14.603286 12.093225 33.152634

C 15.650836 12.778042 32.452202  
C 15.985817 13.974762 33.162334  
C 15.647322 15.179199 32.464565  
C 14.607810 15.869560 33.162445

C 13.368615 15.940743 32.453167  
C 12.372539 15.178343 33.147999

Below, we provided the atomic positions of the lowest energy configurations for the armchair CNT fragment (3,3) and the zigzag (5,0) CNT fragment, respectively, adhered to *3d*, *4d*, and *5d* TM<sub>13</sub> nanoclusters.

06H60C13Sc  
H 13.191867 16.320583 20.528164  
H 11.611984 14.396585 20.516582  
H 15.886662 15.910986 20.647249  
H 16.762318 13.579559 20.725973  
H 15.027840 11.469974 20.706676  
H 12.568402 11.854147 20.610130  
C 16.315514 14.047696 21.604389  
C 15.838265 15.316477 21.560890  
C 12.969087 15.764930 21.440407  
C 12.108794 14.715702 21.433968  
C 13.130835 12.004334 21.532890  
C 14.470174 11.795811 21.586111  
C 15.108416 15.796164 22.738890  
C 13.713587 16.015289 22.679585  
C 12.004207 13.927759 22.666039  
C 12.503823 12.605762 22.714140  
C 15.162198 12.185810 22.818485

C 16.057259 13.278776 22.826742  
C 12.973395 15.815771 23.896372  
C 12.048988 14.684027 23.888084  
C 13.007337 12.151071 23.980837  
C 14.447766 11.920500 24.038292  
C 16.164364 14.020422 24.054588  
C 15.647511 15.386300 24.006725  
C 11.895030 13.994111 25.122101  
C 12.403108 12.641319 25.172018  
C 15.076506 12.212186 25.279301  
C 15.992777 13.333076 25.287449  
C 15.035877 15.865809 25.197721  
C 13.608342 16.093794 25.138575  
C 12.930799 12.218128 26.443920  
C 14.338780 11.998966 26.497726  
C 16.040854 14.083449 26.514538  
C 15.544326 15.418652 26.469496  
C 12.892772 15.839427 26.362736

C 11.990579 14.733832 26.354053  
C 14.975712 12.272237 27.760176  
C 15.890752 13.389688 27.768419  
C 14.953136 15.929310 27.680511  
C 13.527118 16.144039 27.619434  
C 11.806997 14.038992 27.601519  
C 12.301592 12.683985 27.653992  
C 15.987068 14.135424 28.979998  
C 15.490296 15.514331 28.938889  
C 12.800022 15.913227 28.824686  
C 11.875674 14.784466 28.815187  
C 12.802653 12.226464 28.912607  
C 14.253439 12.015323 28.962948  
C 14.862117 15.983011 30.134876  
C 13.446260 16.171377 30.072618  
C 11.741599 14.087297 30.055403  
C 12.208122 12.736955 30.109285  
C 14.881122 12.336389 30.203072  
C 15.788780 13.444157 30.211969  
C 12.712790 15.956312 31.321617  
C 11.799061 14.835176 31.313982  
C 12.722798 12.313711 31.425026  
C 14.157814 12.094848 31.456463  
C 15.873744 14.190651 31.472584  
C 15.370975 15.552114 31.449482  
C 11.418829 14.100119 32.506817  
C 11.967016 12.734324 32.621292

C 14.936761 12.212025 32.685551  
C 15.902188 13.395258 32.695286  
C 14.793082 16.198650 32.645641  
C 13.349458 16.466120 32.522911  
Sc 13.742668 14.171497 32.670815  
Sc 14.199947 13.786643 35.911133  
Sc 16.301378 12.075888 34.319683  
Sc 11.354540 13.684862 34.524124  
Sc 16.423267 15.214125 33.836372  
Sc 13.722794 16.586641 34.546478  
Sc 13.251122 11.323933 33.805828  
Sc 14.414525 13.560678 38.826843  
Sc 15.256590 16.151663 37.379520  
Sc 12.243767 15.319023 37.480606  
Sc 12.074134 12.220718 37.313721  
Sc 14.986902 11.108320 36.950340  
Sc 16.961044 13.542846 36.970440

06H60C13Ti

H 13.095462 16.382835 20.597153  
H 11.538610 14.432076 20.581211  
H 15.806587 15.965158 20.672091  
H 16.699896 13.636494 20.727089  
H 14.985029 11.481683 20.721828  
H 12.519478 11.860603 20.651199  
C 16.254332 14.096242 21.610268  
C 15.768967 15.362111 21.580431

C 12.896040 15.804340 21.500359  
C 12.051079 14.744952 21.492105  
C 13.095350 12.025046 21.563017  
C 14.434723 11.818760 21.601503  
C 15.048158 15.826973 22.772449  
C 13.655929 16.038710 22.735355  
C 11.976019 13.941445 22.719395  
C 12.481280 12.627973 22.752689  
C 15.134417 12.219816 22.827089  
C 16.014212 13.319778 22.831833  
C 12.930631 15.823352 23.961950  
C 12.016322 14.686702 23.953184  
C 12.994460 12.163626 24.016838  
C 14.432816 11.944812 24.055229  
C 16.129368 14.055902 24.065910  
C 15.605596 15.413307 24.035122  
C 11.870629 13.987588 25.181969  
C 12.390720 12.634885 25.216581  
C 15.073543 12.228316 25.290258  
C 15.984279 13.356922 25.295832  
C 15.008983 15.886764 25.237654  
C 13.575967 16.101599 25.197876  
C 12.938233 12.212099 26.476501  
C 14.346904 12.003756 26.509602  
C 16.037510 14.098604 26.523396  
C 15.532917 15.430554 26.496727  
C 12.878340 15.826859 26.426638

C 11.981771 14.717944 26.418446  
C 14.992670 12.279822 27.767771  
C 15.894241 13.393575 27.774031  
C 14.947098 15.920132 27.724167  
C 13.524424 16.123779 27.681747  
C 11.819819 14.015590 27.667675  
C 12.323090 12.669108 27.703964  
C 16.014492 14.127592 28.996746  
C 15.503177 15.504211 28.975317  
C 12.807042 15.892912 28.896393  
C 11.887225 14.757446 28.888584  
C 12.836849 12.201373 28.954817  
C 14.289824 11.995399 28.982944  
C 14.884820 15.960540 30.178675  
C 13.466932 16.157728 30.132338  
C 11.762450 14.047022 30.119064  
C 12.253128 12.701727 30.158726  
C 14.940790 12.304793 30.204454  
C 15.839804 13.415878 30.210766  
C 12.762609 15.899289 31.384916  
C 11.860397 14.781770 31.378292  
C 12.809769 12.299534 31.459974  
C 14.233560 12.074471 31.471090  
C 15.905836 14.145950 31.483263  
C 15.387730 15.491327 31.479982  
C 11.562357 14.073605 32.598610  
C 12.125557 12.724745 32.697205

C 14.974388 12.176579 32.715881  
C 15.955291 13.391826 32.722828  
C 14.820268 16.062649 32.717281  
C 13.385090 16.332687 32.612118  
Ti 13.865318 14.077327 32.648533  
Ti 14.188697 13.799895 35.549034  
Ti 16.150644 12.220382 34.397301  
Ti 11.658882 13.763341 34.560524  
Ti 16.158651 15.075050 34.153645  
Ti 13.698924 16.287315 34.576103  
Ti 13.362850 11.615369 34.135193  
Ti 14.392360 13.619558 38.144264  
Ti 15.180861 15.847330 36.807266  
Ti 12.540229 15.125280 37.038971  
Ti 12.387641 12.392143 36.785435  
Ti 14.845847 11.454531 36.576637  
Ti 16.613823 13.640831 36.590691

06H60C13V

H 13.164381 16.395079 20.610010  
H 11.580785 14.464306 20.573292  
H 15.880121 15.946904 20.711866  
H 16.753483 13.606876 20.768673  
H 15.002123 11.472014 20.736668  
H 12.538587 11.877611 20.647509  
C 16.297663 14.069015 21.645483  
C 15.824042 15.337563 21.614948

C 12.954438 15.811623 21.507498  
C 12.095418 14.763758 21.487415  
C 13.111012 12.033753 21.562908  
C 14.447035 11.813699 21.611544  
C 15.092829 15.804448 22.802120  
C 13.706493 16.031248 22.749945  
C 12.004025 13.956758 22.711926  
C 12.496420 12.640933 22.749992  
C 15.139807 12.203856 22.846937  
C 16.030157 13.292361 22.863523  
C 12.963186 15.824445 23.970169  
C 12.041187 14.698524 23.948711  
C 12.993118 12.165485 24.019529  
C 14.427644 11.930029 24.071482  
C 16.142704 14.022583 24.103466  
C 15.632668 15.384930 24.072050  
C 11.874160 13.997159 25.174068  
C 12.385147 12.638868 25.214029  
C 15.063877 12.200768 25.313601  
C 15.983311 13.323329 25.330288  
C 15.027495 15.864003 25.267567  
C 13.595729 16.098434 25.213268  
C 12.921784 12.212608 26.477966  
C 14.326681 11.985080 26.528631  
C 16.030876 14.065961 26.559336  
C 15.530380 15.398488 26.530268  
C 12.880571 15.826482 26.430935



C 11.979581 14.725537 26.408607  
C 14.967853 12.253256 27.795797  
C 15.874997 13.360779 27.810074  
C 14.931138 15.886207 27.754265  
C 13.514174 16.111057 27.700787  
C 11.801979 14.022203 27.659004  
C 12.307507 12.680955 27.699476  
C 15.989264 14.091366 29.037399  
C 15.471495 15.468017 29.011719  
C 12.772719 15.898546 28.905470  
C 11.837962 14.766866 28.878777  
C 12.805842 12.208101 28.956293  
C 14.255473 11.975717 29.008942  
C 14.836469 15.931067 30.201286  
C 13.420661 16.153904 30.148603  
C 11.697053 14.050819 30.097462  
C 12.206209 12.713585 30.142897  
C 14.902036 12.264626 30.239895  
C 15.814951 13.372745 30.245796  
C 12.702787 15.880610 31.395054  
C 11.802285 14.766827 31.364407  
C 12.751340 12.321413 31.445324  
C 14.159689 12.062576 31.494221  
C 15.828050 14.101031 31.514833  
C 15.301160 15.440186 31.503372  
C 11.521220 14.072337 32.594955  
C 12.083357 12.726444 32.703407

C 14.799680 12.224547 32.806042  
C 15.788168 13.370944 32.784023  
C 14.729496 16.012186 32.750290  
C 13.289440 16.276724 32.657639  
V 13.767209 14.066308 32.587643  
V 14.326096 13.862437 35.271702  
V 16.047405 12.187685 34.513535  
V 11.889297 14.352722 34.522064  
V 15.916355 14.946221 34.018955  
V 13.402624 16.021832 34.606293  
V 13.264162 12.080000 34.295719  
V 14.726648 13.352960 37.851768  
V 15.578528 15.401829 36.718582  
V 12.780065 14.810887 36.942627  
V 12.472607 12.877062 36.552208  
V 15.043249 11.824986 36.679729  
V 16.702385 13.864908 36.295433

06H60C13Cr

H 13.018420 16.405535 20.618141  
H 11.404248 14.492175 20.647053  
H 15.770434 15.896827 20.620560  
H 16.623802 13.544848 20.656574  
H 14.809675 11.408411 20.690893  
H 12.349171 11.860942 20.684568  
C 16.186226 14.010459 21.540915  
C 15.723852 15.282953 21.521290

C 12.844851 15.813309 21.517820  
C 11.971625 14.778711 21.533890  
C 12.960519 12.023899 21.573320  
C 14.291895 11.779578 21.576721  
C 15.028820 15.753049 22.729416  
C 13.654688 16.008564 22.729382  
C 11.930946 13.968822 22.760870  
C 12.403454 12.654967 22.778833  
C 15.033170 12.173594 22.784866  
C 15.937758 13.238113 22.768307  
C 12.955513 15.815375 23.985157  
C 12.023520 14.713782 24.003111  
C 12.938086 12.174922 24.038977  
C 14.357796 11.914071 24.042774  
C 16.102303 13.970312 24.011152  
C 15.608765 15.327506 23.988752  
C 11.876499 14.019545 25.237825  
C 12.371001 12.651073 25.254753  
C 15.050424 12.160322 25.262262  
C 15.989688 13.271640 25.246422  
C 15.065294 15.833655 25.204521  
C 13.634922 16.094959 25.204845  
C 12.948854 12.217162 26.491230  
C 14.352507 11.961556 26.497326  
C 16.087822 14.017633 26.467619  
C 15.604996 15.360594 26.444910  
C 12.958218 15.839496 26.443420

C 12.035847 14.750354 26.460592  
C 15.037869 12.231300 27.744385  
C 15.953070 13.322613 27.728743  
C 15.047933 15.850078 27.686401  
C 13.648160 16.100323 27.689373  
C 11.916421 14.047981 27.721163  
C 12.395264 12.707312 27.733353  
C 16.105488 14.057387 28.953979  
C 15.625581 15.418015 28.930220  
C 12.955988 15.891011 28.934938  
C 12.023938 14.784893 28.950977  
C 12.933895 12.226063 28.973494  
C 14.361621 11.976305 28.984432  
C 15.082801 15.931454 30.149729  
C 13.639221 16.175552 30.156612  
C 11.874327 14.079306 30.185318  
C 12.350126 12.696063 30.188282  
C 15.063434 12.224986 30.209774  
C 16.001162 13.346230 30.195066  
C 12.965841 15.901156 31.400021  
C 12.043066 14.805984 31.416460  
C 12.938798 12.260036 31.418259  
C 14.350662 12.028056 31.438835  
C 16.104612 14.101411 31.407358  
C 15.630571 15.446628 31.379166  
C 11.897662 14.081509 32.686199  
C 12.406347 12.749740 32.688007

C 14.991005 12.343554 32.720783  
C 15.939578 13.420835 32.694675  
C 15.069515 15.909220 32.655960  
C 13.674082 16.179554 32.656536  
Cr 13.943037 14.163489 33.322758  
Cr 13.976585 13.849195 35.474449  
Cr 15.916773 12.789088 34.620911  
Cr 11.749464 14.415063 34.672821  
Cr 15.969891 15.267657 34.374565  
Cr 13.116735 16.207075 34.602184  
Cr 13.386453 11.844988 34.234535  
Cr 13.863064 13.247403 37.806618  
Cr 14.768005 15.864383 36.511963  
Cr 12.400272 15.213457 37.118423  
Cr 12.001287 12.389649 36.303192  
Cr 14.722652 11.424097 36.436035  
Cr 16.252134 13.841182 36.823978

06H60C13Mn

H 13.024093 16.462603 20.628256  
H 11.428503 14.526900 20.611370  
H 15.815951 15.981634 20.668030  
H 16.698322 13.638010 20.692308  
H 14.895454 11.449054 20.674088  
H 12.426763 11.878248 20.632828  
C 16.227295 14.085511 21.568914  
C 15.750693 15.351555 21.556379

C 12.852648 15.846855 21.512463  
C 11.992895 14.803037 21.503395  
C 13.026845 12.050809 21.527514  
C 14.359464 11.818866 21.549486  
C 15.021634 15.794305 22.756657  
C 13.650372 16.026995 22.737562  
C 11.956099 13.973781 22.719923  
C 12.446468 12.671823 22.730392  
C 15.075191 12.219228 22.773010  
C 15.958984 13.295006 22.781195  
C 12.936009 15.811472 23.988878  
C 12.022138 14.703574 23.979095  
C 12.965275 12.182247 23.999527  
C 14.382539 11.940575 24.021608  
C 16.093061 14.016155 24.036831  
C 15.588532 15.360312 24.025257  
C 11.854165 13.994788 25.205542  
C 12.369064 12.630956 25.214273  
C 15.056759 12.174438 25.254772  
C 15.984953 13.297016 25.262642  
C 15.028775 15.849668 25.241505  
C 13.591783 16.093981 25.223843  
C 12.933145 12.192487 26.454231  
C 14.342823 11.952071 26.475426  
C 16.063019 14.028360 26.488544  
C 15.560412 15.366214 26.477173  
C 12.899691 15.815261 26.445866

C 11.987354 14.715181 26.436274  
C 15.006243 12.223356 27.731735  
C 15.910996 13.313918 27.738678  
C 14.971844 15.822508 27.719501  
C 13.575671 16.057066 27.707235  
C 11.863480 13.999315 27.692207  
C 12.363249 12.672893 27.696165  
C 16.043236 14.034794 28.979073  
C 15.542875 15.385462 28.967499  
C 12.871330 15.835920 28.947845  
C 11.949558 14.724895 28.938168  
C 12.893800 12.188527 28.944864  
C 14.312271 11.954893 28.967918  
C 14.986264 15.889740 30.184547  
C 13.541070 16.122971 30.176294  
C 11.792857 14.010854 30.165226  
C 12.285652 12.631393 30.164349  
C 15.001786 12.182002 30.205460  
C 15.939296 13.307482 30.208633  
C 12.852367 15.847309 31.408813  
C 11.943108 14.737951 31.398861  
C 12.862773 12.171864 31.384529  
C 14.275188 11.953513 31.416683  
C 16.024998 14.053919 31.426258  
C 15.525646 15.396802 31.413319  
C 11.843534 13.992867 32.650818  
C 12.345597 12.678230 32.661037

C 14.877749 12.293300 32.717083  
C 15.828296 13.370042 32.706966  
C 14.938873 15.841187 32.688232  
C 13.543262 16.139154 32.665222  
Mn 13.896408 14.075190 33.219982  
Mn 14.130120 13.985353 35.658009  
Mn 15.983633 12.431787 34.494038  
Mn 11.817383 14.251982 34.611416  
Mn 16.020185 15.037606 34.249222  
Mn 13.468062 16.107973 34.618790  
Mn 13.358850 11.924219 34.271385  
Mn 14.260508 13.778491 37.838158  
Mn 15.154952 15.851145 36.576050  
Mn 12.608778 15.396774 36.913467  
Mn 12.149373 12.820354 36.764374  
Mn 14.680279 11.766401 36.602776  
Mn 16.491426 13.739625 36.654053

06H60C13Fe

H 13.107695 16.492954 20.661455  
H 11.424817 14.639355 20.656488  
H 15.846415 15.898506 20.659376  
H 16.608953 13.513314 20.656500  
H 14.729755 11.431664 20.655367  
H 12.281305 11.958986 20.653908  
C 16.188841 13.982007 21.547709  
C 15.776261 15.271142 21.549158

C 12.914293 15.890392 21.550102  
C 12.004344 14.888133 21.546703  
C 12.899044 12.095951 21.542713  
C 14.222175 11.810678 21.543644  
C 15.094939 15.742065 22.764853  
C 13.730701 16.035458 22.765182  
C 11.935863 14.057784 22.759418  
C 12.360426 12.728917 22.757761  
C 14.970762 12.166700 22.760359  
C 15.908469 13.199765 22.761734  
C 13.024831 15.841556 24.019535  
C 12.055534 14.776730 24.016632  
C 12.875261 12.210514 24.013088  
C 14.285427 11.907269 24.014399  
C 16.096710 13.904762 24.018528  
C 15.658674 15.277011 24.019831  
C 11.875339 14.068569 25.239559  
C 12.319868 12.682380 25.235992  
C 14.982903 12.110923 25.238422  
C 15.963614 13.186906 25.241896  
C 15.133269 15.780115 25.245033  
C 13.709725 16.084068 25.244892  
C 12.879677 12.211870 26.467607  
C 14.275945 11.914318 26.469051  
C 16.090302 13.905766 26.474113  
C 15.655526 15.265290 26.474226  
C 13.020909 15.829185 26.473629

C 12.059132 14.774834 26.472286  
C 14.966823 12.141045 27.719011  
C 15.925406 13.193552 27.724827  
C 15.105314 15.745214 27.724556  
C 13.717912 16.039352 27.724726  
C 11.907218 14.058852 27.722887  
C 12.339204 12.701320 27.716661  
C 16.097269 13.899050 28.964331  
C 15.661090 15.275135 28.965015  
C 13.014777 15.839844 28.963926  
C 12.042260 14.773203 28.961872  
C 12.864985 12.190362 28.951456  
C 14.275963 11.890081 28.952814  
C 15.134685 15.791197 30.188156  
C 13.703166 16.094517 30.188921  
C 11.873063 14.060397 30.192301  
C 12.303689 12.663934 30.182667  
C 14.980242 12.087448 30.186214  
C 15.949563 13.180306 30.194046  
C 13.006590 15.848401 31.423737  
C 12.058487 14.774868 31.422394  
C 12.859783 12.150661 31.394102  
C 14.259768 11.848325 31.397652  
C 16.076954 13.908830 31.422695  
C 15.666983 15.281311 31.422489  
C 11.936985 14.009938 32.664165  
C 12.394669 12.684472 32.675301

C 14.894986 12.151434 32.682533  
C 15.864396 13.166452 32.662994  
C 15.120672 15.827237 32.669250  
C 13.729124 16.126595 32.670856  
Fe 14.018130 14.117682 33.237293  
Fe 14.023780 14.045693 35.593113  
Fe 15.914757 13.116953 34.581947  
Fe 11.892445 14.043356 34.589172  
Fe 15.621685 15.576547 34.543457  
Fe 13.234685 16.109116 34.566689  
Fe 13.530212 11.964750 34.205299  
Fe 14.046173 14.019738 37.837494  
Fe 14.522590 16.190317 36.666893  
Fe 12.217926 15.126948 36.721512  
Fe 12.420607 12.495675 36.423641  
Fe 14.709994 11.974954 36.450665  
Fe 16.147287 14.279103 36.679115

06H60C13Co

H 13.095500 16.514534 20.673727  
H 11.416277 14.660881 20.668819  
H 15.828965 15.937650 20.663628  
H 16.596132 13.555423 20.652697  
H 14.727795 11.486254 20.645878  
H 12.278687 12.001219 20.651756  
C 16.179092 14.020622 21.547230  
C 15.763798 15.309344 21.553148

C 12.900734 15.914690 21.563835  
C 11.991886 14.911449 21.561153  
C 12.894633 12.128690 21.543251  
C 14.219178 11.849434 21.540163  
C 15.086340 15.776917 22.772427  
C 13.718006 16.061493 22.777164  
C 11.924456 14.078416 22.771156  
C 12.354506 12.749560 22.762852  
C 14.969008 12.197490 22.756840  
C 15.906116 13.234001 22.760227  
C 13.016315 15.860237 24.030840  
C 12.046745 14.792013 24.028687  
C 12.874107 12.228431 24.013725  
C 14.286941 11.933944 24.010529  
C 16.095612 13.935590 24.016466  
C 15.654453 15.309480 24.022774  
C 11.875861 14.078709 25.248905  
C 12.321083 12.693730 25.240238  
C 14.985873 12.138136 25.234600  
C 15.962175 13.215795 25.238405  
C 15.128167 15.806752 25.249462  
C 13.704102 16.100145 25.253592  
C 12.884549 12.220893 26.469751  
C 14.282767 11.933922 26.466446  
C 16.089088 13.932450 26.472996  
C 15.654812 15.292397 26.477364  
C 13.019742 15.839531 26.483990

C 12.061904 14.781564 26.482922  
C 14.973450 12.159494 27.716772  
C 15.927358 13.218731 27.721373  
C 15.109466 15.773630 27.727615  
C 13.716292 16.058231 27.730967  
C 11.912856 14.062907 27.729752  
C 12.343375 12.703605 27.721828  
C 16.095840 13.923946 28.960625  
C 15.664445 15.301293 28.964483  
C 13.017392 15.847795 28.968252  
C 12.052570 14.775116 28.967937  
C 12.871480 12.191681 28.954647  
C 14.285648 11.900565 28.950830  
C 15.139641 15.819008 30.190804  
C 13.705089 16.111692 30.193922  
C 11.883141 14.059354 30.198347  
C 12.312271 12.661724 30.189705  
C 14.990443 12.098345 30.183296  
C 15.954112 13.199810 30.188927  
C 13.008458 15.860674 31.424631  
C 12.068622 14.776419 31.423452  
C 12.872299 12.143378 31.397745  
C 14.271873 11.848162 31.393339  
C 16.083420 13.929697 31.413012  
C 15.675780 15.305245 31.418859  
C 11.980374 14.011377 32.666058  
C 12.443632 12.683811 32.691238

C 14.890003 12.168421 32.682476  
C 15.854822 13.192443 32.652905  
C 15.114082 15.809144 32.678787  
C 13.729305 16.100315 32.681900  
Co 14.035736 14.139190 33.117390  
Co 14.017687 13.975025 35.561810  
Co 15.896384 12.984735 34.530300  
Co 11.887532 13.854808 34.548515  
Co 15.579659 15.404846 34.533722  
Co 13.174688 15.927628 34.548397  
Co 13.601144 12.089070 34.264065  
Co 14.005331 13.856678 37.850838  
Co 14.461193 15.982707 36.635658  
Co 12.216918 14.943336 36.646023  
Co 12.476155 12.534125 36.528950  
Co 14.833340 12.022716 36.517082  
Co 16.071285 14.107338 36.625130

06H60C13Ni

H 13.092707 16.525410 20.691650  
H 11.415051 14.670615 20.676344  
H 15.829251 15.948594 20.684448  
H 16.604311 13.569099 20.661316  
H 14.733793 11.497041 20.639002  
H 12.285190 12.011947 20.642935  
C 16.184284 14.027822 21.557486  
C 15.765217 15.315040 21.570169

C 12.898873 15.920787 21.578697  
C 11.990108 14.917236 21.570139  
C 12.898795 12.133616 21.536627  
C 14.223840 11.854886 21.534618  
C 15.083837 15.773137 22.789652  
C 13.716410 16.059677 22.792988  
C 11.923965 14.076634 22.774693  
C 12.356386 12.748128 22.758560  
C 14.972272 12.196959 22.753542  
C 15.909536 13.233367 22.764694  
C 13.014194 15.851291 24.044964  
C 12.045616 14.784425 24.036419  
C 12.877514 12.223136 24.006893  
C 14.288048 11.927433 24.004169  
C 16.095707 13.927234 24.025972  
C 15.652066 15.298937 24.038345  
C 11.872679 14.065146 25.254524  
C 12.322074 12.682493 25.236809  
C 14.986486 12.122877 25.230856  
C 15.963064 13.199541 25.244442  
C 15.124849 15.790074 25.267189  
C 13.701582 16.085249 25.270535  
C 12.883142 12.200528 26.462194  
C 14.282738 11.908873 26.458565  
C 16.089645 13.908853 26.483234  
C 15.652514 15.269960 26.492155  
C 13.014317 15.822115 26.497858

C 12.053735 14.762549 26.492954  
C 14.972408 12.131091 27.709499  
C 15.925305 13.187660 27.726723  
C 15.104075 15.740666 27.742207  
C 13.712879 16.027613 27.744127  
C 11.909355 14.035203 27.734827  
C 12.344752 12.680292 27.715195  
C 16.091944 13.885751 28.975161  
C 15.661158 15.262191 28.978354  
C 13.012696 15.812841 28.981920  
C 12.050606 14.738467 28.983204  
C 12.870584 12.155179 28.944904  
C 14.283808 11.859072 28.940617  
C 15.137203 15.779179 30.202618  
C 13.703759 16.074980 30.204388  
C 11.893495 14.011204 30.209408  
C 12.309534 12.610559 30.180874  
C 14.989088 12.047720 30.172560  
C 15.938743 13.157550 30.200718  
C 13.007163 15.827635 31.436758  
C 12.092098 14.714581 31.444572  
C 12.868589 12.064828 31.378187  
C 14.266539 11.770254 31.373598  
C 16.052326 13.878279 31.438782  
C 15.674641 15.270735 31.434879  
C 12.052921 13.929953 32.680054  
C 12.470484 12.586170 32.678993



C 14.855427 12.079507 32.668736  
C 15.780216 13.139816 32.671593  
C 15.116220 15.817631 32.670780  
C 13.738962 16.105082 32.672928  
Ni 14.049852 14.165796 33.200603  
Ni 14.039335 14.061199 35.527786  
Ni 15.985568 13.100012 34.519489  
Ni 11.860796 13.969247 34.530693  
Ni 15.618254 15.542945 34.492451  
Ni 13.165989 16.050434 34.492527  
Ni 13.616410 12.061700 34.150005  
Ni 13.985688 14.010527 37.836838  
Ni 14.405899 16.059614 36.638836  
Ni 12.184052 15.132298 36.587654  
Ni 12.477278 12.677589 36.500565  
Ni 14.845488 12.170260 36.499249  
Ni 16.074615 14.305984 36.600498

06H60C13Cu

H 13.134131 16.442596 20.641983  
H 11.460913 14.590349 20.646654  
H 15.826760 15.892794 20.651024  
H 16.590012 13.514298 20.654697  
H 14.748071 11.463206 20.660795  
H 12.302916 11.971919 20.655794  
C 16.187225 13.986336 21.551950  
C 15.773461 15.276706 21.549711

C 12.923059 15.867803 21.544956  
C 12.014030 14.862040 21.546745  
C 12.909558 12.093628 21.554464  
C 14.236423 11.816978 21.556992  
C 15.099618 15.756063 22.764273  
C 13.725546 16.042639 22.762007  
C 11.930555 14.047496 22.765779  
C 12.357636 12.709613 22.768917  
C 14.983115 12.167498 22.772488  
C 15.924868 13.208179 22.769487  
C 13.021089 15.843827 24.009995  
C 12.047638 14.773086 24.011290  
C 12.882265 12.205480 24.017450  
C 14.299847 11.907099 24.020287  
C 16.104187 13.918887 24.016613  
C 15.664904 15.298303 24.014357  
C 11.885337 14.067146 25.238050  
C 12.331697 12.686360 25.240383  
C 14.991428 12.130293 25.243896  
C 15.965464 13.205934 25.242804  
C 15.126643 15.790411 25.237118  
C 13.705643 16.086323 25.236814  
C 12.888288 12.217308 26.474874  
C 14.288036 11.929544 26.479023  
C 16.095079 13.925872 26.475677  
C 15.653433 15.283998 26.471809  
C 13.019180 15.837093 26.471628

C 12.062285 14.777553 26.472445  
C 14.981341 12.155964 27.723602  
C 15.948373 13.211912 27.725058  
C 15.109292 15.769567 27.717705  
C 13.712271 16.061430 27.721872  
C 11.905457 14.064042 27.720501  
C 12.340395 12.702514 27.718868  
C 16.108738 13.923454 28.955828  
C 15.672811 15.302979 28.951107  
C 13.014888 15.843735 28.955593  
C 12.033071 14.783257 28.956060  
C 12.879318 12.207096 28.949734  
C 14.290732 11.905457 28.954937  
C 15.138660 15.805779 30.175144  
C 13.710339 16.079470 30.186104  
C 11.875053 14.072254 30.187010  
C 12.323496 12.686579 30.179960  
C 14.984961 12.117924 30.189959  
C 15.954508 13.206565 30.193169  
C 13.023092 15.849672 31.432753  
C 12.065643 14.775719 31.431002  
C 12.868009 12.170953 31.401855  
C 14.265356 11.880822 31.409910  
C 16.102287 13.935256 31.419430  
C 15.672558 15.303392 31.411657  
C 11.883389 13.984782 32.647057  
C 12.302861 12.645632 32.660469

C 14.951803 12.178570 32.659882  
C 15.903460 13.185634 32.649994  
C 15.129134 15.842711 32.641335  
C 13.756234 16.203924 32.660904  
Cu 13.925803 14.156045 33.214611  
Cu 13.978168 14.057074 35.633926  
Cu 15.773142 12.625157 34.524689  
Cu 11.725727 14.250834 34.570843  
Cu 15.873060 15.151488 34.351475  
Cu 13.251171 16.245041 34.549931  
Cu 13.331530 12.009513 34.254482  
Cu 14.051515 13.951255 38.038055  
Cu 14.756281 16.034452 36.608742  
Cu 12.359199 15.334747 36.760281  
Cu 12.212248 12.832901 36.595840  
Cu 14.546819 11.947726 36.540218  
Cu 16.147467 13.952065 36.575214

06H60C13Zn

H 12.902134 16.609045 20.661993  
H 11.256139 14.717786 20.650494  
H 15.677040 16.045448 20.584019  
H 16.508217 13.683788 20.522387  
H 14.663040 11.558135 20.510040  
H 12.207355 12.045389 20.559528  
C 16.085836 14.121720 21.427799  
C 15.636124 15.398026 21.461016

C 12.748960 15.972012 21.534485  
C 11.860384 14.951509 21.528093  
C 12.837952 12.174932 21.440340  
C 14.164701 11.911748 21.413754  
C 14.962883 15.827537 22.697313  
C 13.595166 16.098351 22.732609  
C 11.845221 14.087400 22.720358  
C 12.308279 12.773143 22.677385  
C 14.928718 12.257421 22.623129  
C 15.844510 13.308448 22.630459  
C 12.918782 15.867454 23.997581  
C 11.971545 14.781388 23.992542  
C 12.855851 12.237906 23.912384  
C 14.270300 11.964108 23.883471  
C 16.041819 13.991680 23.896978  
C 15.564227 15.350843 23.931938  
C 11.833114 14.044103 25.202662  
C 12.313141 12.668217 25.155643  
C 14.988184 12.152161 25.097790  
C 15.950609 13.245720 25.107321  
C 15.054942 15.817846 25.176483  
C 13.624160 16.094376 25.212355  
C 12.909845 12.186751 26.364304  
C 14.310102 11.918983 26.334978  
C 16.083252 13.943233 26.352306  
C 15.613997 15.289607 26.384449  
C 12.969250 15.798347 26.450033

C 12.029522 14.726350 26.448423  
C 15.024833 12.133316 27.578861  
C 15.960312 13.202858 27.596020  
C 15.082721 15.735616 27.656998  
C 13.688828 16.002945 27.691551  
C 11.923446 13.980426 27.690615  
C 12.388451 12.638981 27.638714  
C 16.148626 13.887468 28.851391  
C 15.680450 15.259829 28.874004  
C 13.008341 15.775584 28.937140  
C 12.062231 14.674660 28.943905  
C 12.942507 12.099363 28.847456  
C 14.369968 11.825253 28.816936  
C 15.149085 15.718360 30.111626  
C 13.722400 15.994288 30.147060  
C 11.963737 13.927444 30.158758  
C 12.410035 12.545824 30.092859  
C 15.087156 12.033636 30.034090  
C 16.015005 13.150799 30.071369  
C 13.069673 15.700068 31.402941  
C 12.181467 14.600071 31.422432  
C 13.009186 12.040911 31.294392  
C 14.398137 11.776682 31.265787  
C 16.118271 13.847106 31.342388  
C 15.703527 15.198133 31.340649  
C 12.065004 13.793142 32.656029  
C 12.516244 12.481201 32.581009

C 15.066430 12.001506 32.530243  
C 15.971491 13.047807 32.581070  
C 15.195840 15.838303 32.555286  
C 13.831069 16.080238 32.597195  
Zn 14.085096 14.167035 33.858040  
Zn 15.404567 14.794539 36.361351  
Zn 16.483967 13.255735 34.523720  
Zn 11.517464 14.156754 34.570290  
Zn 16.083805 16.025284 34.373920  
Zn 13.131554 16.553961 34.478859  
Zn 13.706085 11.676477 34.106979  
Zn 12.702164 13.718810 38.734825  
Zn 14.342236 15.664947 38.562325  
Zn 12.701967 15.278748 36.533447  
Zn 12.571602 12.639222 36.319374  
Zn 15.032881 12.186714 36.313457  
Zn 15.146835 13.269044 38.677795

06H60C13Y

H 13.291777 16.179058 20.506153  
H 11.740251 14.236846 20.499781  
H 15.949928 15.763578 20.697466  
H 16.851368 13.454801 20.880993  
H 15.175456 11.359177 20.875023  
H 12.724497 11.735898 20.686226  
C 16.391830 13.949409 21.737999  
C 15.898531 15.211115 21.636894

C 13.040886 15.654622 21.429556  
C 12.193132 14.593445 21.426023  
C 13.249878 11.900423 21.628338  
C 14.588529 11.693796 21.731712  
C 15.144420 15.731107 22.780600  
C 13.743870 15.947829 22.679647  
C 12.058571 13.837837 22.673521  
C 12.576360 12.519535 22.772625  
C 15.239059 12.109982 22.976347  
C 16.127050 13.218870 22.979319  
C 12.972280 15.769453 23.874809  
C 12.055760 14.624875 23.871861  
C 13.042690 12.105133 24.063595  
C 14.486793 11.882809 24.174507  
C 16.183735 14.001019 24.177744  
C 15.649487 15.361567 24.069435  
C 11.881042 13.969366 25.122103  
C 12.407223 12.629960 25.223282  
C 15.075309 12.226004 25.424988  
C 15.977992 13.352136 25.427668  
C 14.994048 15.862035 25.229664  
C 13.571271 16.077820 25.127428  
C 12.903028 12.252853 26.523428  
C 14.310073 12.040571 26.632895  
C 15.991334 14.138100 26.636992  
C 15.470811 15.463135 26.529919  
C 12.818237 15.858978 26.339170

C 11.924611 14.748565 26.336597  
C 14.922218 12.339079 27.901194  
C 15.830154 13.475780 27.903511  
C 14.836615 16.002239 27.701618  
C 13.404102 16.217598 27.602787  
C 11.701308 14.093266 27.597923  
C 12.234289 12.745147 27.694775  
C 15.862044 14.259757 29.092089  
C 15.330161 15.615709 28.976833  
C 12.640285 16.016989 28.788992  
C 11.727848 14.878746 28.786192  
C 12.723360 12.346487 28.968170  
C 14.164556 12.129964 29.087114  
C 14.648578 16.097057 30.138620  
C 13.248180 16.287304 30.060148  
C 11.600658 14.222147 30.054604  
C 12.100515 12.899858 30.129810  
C 14.750292 12.488095 30.350597  
C 15.644279 13.607102 30.354452  
C 12.485773 16.148264 31.322420  
C 11.564071 14.992359 31.318815  
C 12.552894 12.480229 31.455070  
C 13.990388 12.287929 31.585117  
C 15.665311 14.390843 31.591438  
C 15.155571 15.747442 31.464985  
C 11.085602 14.198118 32.453625  
C 11.641171 12.810133 32.542927

C 14.716192 12.463983 32.877392  
C 15.650498 13.639959 32.882397  
C 14.625226 16.555140 32.555592  
C 13.149515 16.787788 32.462273  
Y 13.362700 14.497605 33.019211  
Y 14.879892 13.275126 35.394043  
Y 16.930841 11.673589 33.442184  
Y 10.561539 13.334894 34.490051  
Y 16.613201 15.609854 33.657158  
Y 13.865480 17.467304 34.511772  
Y 13.001662 11.076476 33.630390  
Y 15.044773 13.108414 38.633575  
Y 15.898293 16.039864 37.057388  
Y 12.625678 15.049835 36.949539  
Y 12.400327 11.637360 37.020729  
Y 15.657524 10.430093 36.532463  
Y 17.805326 13.113368 36.575714

06H60C13Zr

H 13.239325 16.320131 20.531677  
H 11.653640 14.398169 20.511436  
H 15.927967 15.883778 20.669619  
H 16.801611 13.550301 20.763517  
H 15.058431 11.449583 20.736557  
H 12.600302 11.846174 20.621483  
C 16.348875 14.023214 21.636229  
C 15.873274 15.292871 21.585123

C 13.010882 15.763396 21.441477  
C 12.147518 14.717049 21.430336  
C 13.157862 11.999167 21.546600  
C 14.495399 11.783252 21.609356  
C 15.137753 15.778517 22.756741  
C 13.746401 16.009953 22.686192  
C 12.033175 13.930927 22.664303  
C 12.525688 12.608306 22.721685  
C 15.178985 12.171465 22.847509  
C 16.079103 13.259416 22.860096  
C 12.995344 15.817597 23.898003  
C 12.067565 14.689802 23.885660  
C 13.016505 12.152585 23.994757  
C 14.454324 11.913745 24.063444  
C 16.176979 14.004342 24.087507  
C 15.664855 15.369617 24.031612  
C 11.899307 14.003429 25.119852  
C 12.405129 12.648947 25.179287  
C 15.076046 12.203229 25.310131  
C 15.995282 13.321791 25.322130  
C 15.046741 15.858315 25.215525  
C 13.620782 16.096336 25.144041  
C 12.922461 12.229873 26.456619  
C 14.328179 11.999141 26.524422  
C 16.035305 14.077280 26.547169  
C 15.540789 15.412930 26.492357  
C 12.892586 15.849046 26.361332

C 11.987249 14.747659 26.349033  
C 14.957147 12.275146 27.792660  
C 15.871986 13.390055 27.804628  
C 14.939243 15.930346 27.696016  
C 13.516170 16.155413 27.624094  
C 11.790548 14.057946 27.599146  
C 12.286078 12.704069 27.659424  
C 15.959028 14.142909 29.016087  
C 15.463209 15.520420 28.960064  
C 12.773326 15.937700 28.822666  
C 11.844335 14.809137 28.809837  
C 12.775507 12.250874 28.923971  
C 14.223057 12.028598 28.993484  
C 14.822127 15.997941 30.146605  
C 13.409674 16.197273 30.075457  
C 11.700362 14.116962 30.051643  
C 12.170850 12.768891 30.111433  
C 14.839614 12.351335 30.241058  
C 15.751351 13.460251 30.252800  
C 12.659474 16.009016 31.325905  
C 11.728267 14.872844 31.312651  
C 12.660872 12.319139 31.428837  
C 14.101453 12.094414 31.483627  
C 15.846037 14.220957 31.505674  
C 15.347035 15.592528 31.463804  
C 11.342302 14.116887 32.496635  
C 11.883101 12.735807 32.617168

C 14.836939 12.247777 32.746883  
C 15.826794 13.451862 32.757927  
C 14.773683 16.260862 32.651840  
C 13.312421 16.521835 32.522747  
Zr 13.669645 14.218224 32.604576  
Zr 14.227828 13.743776 35.643955  
Zr 16.426266 11.944497 34.303631  
Zr 11.392975 13.785128 34.623180  
Zr 16.349482 15.225943 34.134949  
Zr 13.641479 16.527166 34.648232  
Zr 13.195246 11.384010 34.111958  
Zr 14.562273 13.452862 38.499825  
Zr 15.366919 15.987299 37.076813  
Zr 12.481513 15.169374 37.407326  
Zr 12.240568 12.182970 37.053200  
Zr 14.968756 11.139319 36.690491  
Zr 16.923447 13.518901 36.704266

06H60C13Nb

H 13.201932 16.374214 20.555067  
H 11.591130 14.469206 20.539150  
H 15.891521 15.881158 20.649202  
H 16.731983 13.533808 20.721514  
H 14.974692 11.445566 20.712627  
H 12.522953 11.889859 20.621937  
C 16.298183 14.010322 21.601822  
C 15.841120 15.286278 21.562265

C 12.982192 15.806645 21.460564  
C 12.107157 14.770839 21.451714  
C 13.093293 12.032407 21.540821  
C 14.426754 11.791842 21.590141  
C 15.127073 15.775196 22.747316  
C 13.740672 16.026711 22.697187  
C 12.004520 13.974242 22.681114  
C 12.483553 12.649055 22.724491  
C 15.128616 12.168213 22.822607  
C 16.037327 13.245942 22.827394  
C 13.002950 15.834541 23.919476  
C 12.061874 14.721873 23.911001  
C 12.977440 12.174450 23.991903  
C 14.412448 11.915380 24.044186  
C 16.160339 13.984533 24.056828  
C 15.665960 15.355651 24.014893  
C 11.898139 14.031074 25.144361  
C 12.388041 12.668280 25.187733  
C 15.055563 12.189119 25.281921  
C 15.988162 13.296196 25.288504  
C 15.070645 15.847751 25.209522  
C 13.645428 16.104914 25.159668  
C 12.920580 12.235887 26.453672  
C 14.323372 11.984951 26.502831  
C 16.052160 14.044436 26.516052  
C 15.569621 15.384480 26.475826  
C 12.927601 15.859176 26.384119

C 12.012914 14.768013 26.373734  
C 14.982294 12.237192 27.759306  
C 15.903376 13.344538 27.765903  
C 14.981311 15.890130 27.692476  
C 13.567048 16.150663 27.648962  
C 11.833466 14.074002 27.628441  
C 12.321874 12.719800 27.670994  
C 16.014473 14.081491 28.984509  
C 15.515573 15.460340 28.944408  
C 12.831641 15.954142 28.861511  
C 11.896979 14.821306 28.842455  
C 12.833305 12.248807 28.922510  
C 14.273072 11.984385 28.973446  
C 14.897445 15.936951 30.135990  
C 13.492567 16.193069 30.105780  
C 11.776224 14.111953 30.069265  
C 12.260130 12.771401 30.115503  
C 14.931998 12.266270 30.210140  
C 15.842626 13.376191 30.210917  
C 12.782146 15.959326 31.382141  
C 11.860143 14.844281 31.339418  
C 12.786679 12.338089 31.418701  
C 14.212863 12.048363 31.471558  
C 15.922292 14.120868 31.467491  
C 15.402112 15.476807 31.428947  
C 11.457850 14.104928 32.518749  
C 12.010178 12.714373 32.621395

C 14.904177 12.217335 32.764866  
C 15.886353 13.411584 32.756065  
C 14.888535 16.114576 32.661068  
C 13.419714 16.383307 32.639977  
Nb 13.795006 14.156185 32.615917  
Nb 14.166281 13.740139 35.498653  
Nb 16.229906 12.210466 34.615627  
Nb 11.435050 13.869938 34.579597  
Nb 15.999088 15.121023 34.225266  
Nb 12.977608 16.079256 34.751335  
Nb 13.211273 11.730353 34.216347  
Nb 14.452875 13.779638 38.332375  
Nb 15.110080 15.817844 36.843559  
Nb 12.177324 14.796469 37.169041  
Nb 12.408040 12.307962 36.874752  
Nb 15.207491 11.714652 37.149796  
Nb 16.823624 13.787402 36.691673

06H60C13Mo

H 13.046756 16.420900 20.572601  
H 11.476597 14.472217 20.556820  
H 15.803791 15.976622 20.617447  
H 16.714415 13.646747 20.648426  
H 14.971563 11.483998 20.631180  
H 12.500144 11.871270 20.583158  
C 16.258060 14.096083 21.531576  
C 15.765566 15.357191 21.514711



C 12.873684 15.815924 21.463881  
C 12.023261 14.761722 21.455448  
C 13.089323 12.034186 21.486811  
C 14.426710 11.825363 21.512409  
C 15.042351 15.801519 22.716099  
C 13.659526 16.019722 22.690311  
C 11.982696 13.935863 22.672197  
C 12.491282 12.631948 22.689131  
C 15.134454 12.219544 22.740324  
C 16.014254 13.308231 22.749447  
C 12.945533 15.793607 23.930393  
C 12.037020 14.668075 23.920340  
C 13.015821 12.152184 23.952045  
C 14.447405 11.926194 23.979446  
C 16.140249 14.031448 23.997747  
C 15.614924 15.382273 23.980228  
C 11.892334 13.956594 25.145586  
C 12.421287 12.602443 25.161806  
C 15.109407 12.184455 25.211742  
C 16.020294 13.317391 25.221565  
C 15.035121 15.852549 25.190605  
C 13.598167 16.076117 25.164017  
C 12.988345 12.173373 26.411900  
C 14.396551 11.956129 26.437405  
C 16.080704 14.050295 26.455074  
C 15.564341 15.377140 26.438883  
C 12.908449 15.787813 26.387421

C 12.015456 14.678408 26.378359  
C 15.055716 12.220806 27.698425  
C 15.954665 13.337974 27.708189  
C 14.978436 15.845245 27.676819  
C 13.569303 16.061325 27.648941  
C 11.883515 13.961792 27.632757  
C 12.394218 12.629503 27.649857  
C 16.059170 14.065603 28.933790  
C 15.551172 15.422635 28.924112  
C 12.868839 15.823118 28.874304  
C 11.958657 14.687743 28.864759  
C 12.926672 12.153058 28.896355  
C 14.359357 11.944676 28.915665  
C 14.969006 15.893932 30.144485  
C 13.536550 16.092533 30.102921  
C 11.839472 13.970420 30.089632  
C 12.334720 12.610029 30.119341  
C 15.009706 12.224243 30.162077  
C 15.911125 13.358212 30.169308  
C 12.838342 15.826008 31.345873  
C 11.944040 14.703792 31.335321  
C 12.884540 12.169058 31.384914  
C 14.300417 11.955170 31.390015  
C 16.009029 14.097354 31.403244  
C 15.508032 15.440866 31.412853  
C 11.629322 13.949785 32.549984  
C 12.225510 12.609818 32.641006

C 15.076244 12.185861 32.600300  
C 15.949343 13.276055 32.597092  
C 14.943034 15.996407 32.670265  
C 13.496956 16.289328 32.566521  
Mo 13.720273 14.214477 33.255867  
Mo 13.761881 14.174145 36.208324  
Mo 15.437963 12.852700 34.625233  
Mo 11.524367 13.979899 34.606049  
Mo 15.704313 15.474584 34.763828  
Mo 13.400151 16.388321 34.629501  
Mo 12.979725 11.933646 34.695164  
Mo 14.839191 13.448606 38.470856  
Mo 15.511323 15.913108 37.144592  
Mo 11.859955 15.632526 36.359219  
Mo 12.459234 12.023335 36.991043  
Mo 14.731164 11.608311 36.981400  
Mo 16.599514 13.908454 36.963253

06H60C13Tc

H 13.132120 16.677818 20.712801  
H 11.448750 14.832504 20.650261  
H 15.822464 16.089375 20.689783  
H 16.570723 13.707327 20.601267  
H 14.714949 11.651229 20.535196  
H 12.270177 12.184469 20.558058  
C 16.175409 14.149038 21.516092  
C 15.768444 15.439178 21.564255

C 12.926498 16.062309 21.589632  
C 12.013754 15.062945 21.554579  
C 12.887118 12.280731 21.452841  
C 14.210131 11.991760 21.440161  
C 15.105788 15.877532 22.798666  
C 13.735126 16.178143 22.810793  
C 11.930624 14.200417 22.740822  
C 12.348776 12.863628 22.690870  
C 14.962242 12.292582 22.668282  
C 15.908405 13.326216 22.704094  
C 13.030660 15.943495 24.050751  
C 12.053036 14.872992 24.015381  
C 12.862365 12.299975 23.921087  
C 14.281762 11.990555 23.906586  
C 16.105085 13.983300 23.977108  
C 15.667684 15.364431 24.027740  
C 11.882649 14.121459 25.212952  
C 12.321999 12.738071 25.159792  
C 14.980242 12.159703 25.133898  
C 15.963282 13.227270 25.173439  
C 15.139899 15.816799 25.267927  
C 13.721015 16.128489 25.279762  
C 12.886582 12.227171 26.380581  
C 14.280972 11.925541 26.367058  
C 16.096828 13.901356 26.435791  
C 15.663352 15.256516 26.479572  
C 13.033680 15.832696 26.501976

C 12.069752 14.784663 26.471445  
C 14.980869 12.091485 27.620089  
C 15.952326 13.147736 27.664499  
C 15.125831 15.703935 27.743792  
C 13.732153 16.008490 27.752457  
C 11.907929 14.031930 27.698496  
C 12.345510 12.665927 27.644209  
C 16.117643 13.811228 28.920132  
C 15.679293 15.191988 28.961906  
C 13.030895 15.772955 28.979286  
C 12.055896 14.698016 28.951504  
C 12.876411 12.117545 28.852518  
C 14.287774 11.812306 28.839302  
C 15.146071 15.669925 30.194389  
C 13.730721 15.978392 30.199585  
C 11.910570 13.942624 30.161375  
C 12.322949 12.548595 30.111454  
C 14.988137 11.972204 30.088165  
C 15.948150 13.067588 30.135174  
C 13.039765 15.715343 31.447350  
C 12.088306 14.626954 31.415670  
C 12.866899 11.986254 31.305662  
C 14.269822 11.683829 31.289118  
C 16.083776 13.762727 31.391544  
C 15.674036 15.149302 31.440075  
C 11.882562 13.837212 32.634766  
C 12.425915 12.484871 32.618240

C 14.904927 11.938043 32.577694  
C 15.920746 12.950577 32.602985  
C 15.194074 15.778889 32.693798  
C 13.745958 16.093098 32.690487  
Tc 14.031956 14.001607 33.116257  
Tc 14.014151 14.135343 35.715134  
Tc 15.859159 12.797128 34.636856  
Tc 11.755404 13.711782 34.672482  
Tc 15.660511 15.688201 34.769905  
Tc 12.976086 16.124319 34.596992  
Tc 13.541148 11.887720 34.427971  
Tc 14.238313 14.544971 38.120930  
Tc 14.339001 16.558477 36.488499  
Tc 11.986917 14.491658 37.136040  
Tc 12.364169 12.166347 36.783188  
Tc 14.654778 12.200598 37.255295  
Tc 16.370152 14.010204 36.613438

06H60C13Ru

H 13.116264 16.552647 20.654888  
H 11.436011 14.704319 20.629627  
H 15.813866 15.956809 20.640532  
H 16.576883 13.577632 20.608330  
H 14.718825 11.533656 20.580935  
H 12.276159 12.062719 20.589884  
C 16.176176 14.038136 21.512409  
C 15.762256 15.327494 21.529903

C 12.913043 15.952469 21.543049  
C 12.002357 14.949862 21.529190  
C 12.888440 12.168819 21.486586  
C 14.212557 11.882084 21.482105  
C 15.096392 15.792752 22.753796  
C 13.725968 16.092525 22.758549  
C 11.922907 14.110047 22.731945  
C 12.347443 12.773624 22.711941  
C 14.965127 12.205523 22.702799  
C 15.911152 13.242302 22.718386  
C 13.023273 15.883348 24.004812  
C 12.046007 14.813160 23.990131  
C 12.864847 12.241225 23.953409  
C 14.283168 11.933234 23.947752  
C 16.102091 13.930545 23.975708  
C 15.663535 15.312943 23.995218  
C 11.880339 14.089262 25.203167  
C 12.321761 12.706412 25.181786  
C 14.979689 12.132161 25.172195  
C 15.959113 13.202295 25.189743  
C 15.133887 15.791883 25.225277  
C 13.714823 16.097980 25.229719  
C 12.883195 12.222820 26.411409  
C 14.276332 11.920811 26.406294  
C 16.090195 13.903934 26.437422  
C 15.656092 15.262158 26.453510  
C 13.028067 15.831352 26.460619

C 12.066357 14.780859 26.448008  
C 14.972500 12.119908 27.656288  
C 15.939497 13.174498 27.678173  
C 15.117691 15.735104 27.707975  
C 13.722046 16.039921 27.712017  
C 11.908331 14.055224 27.689945  
C 12.340737 12.691381 27.665270  
C 16.100719 13.865430 28.926254  
C 15.666495 15.245299 28.937891  
C 13.022779 15.826702 28.942341  
C 12.049438 14.753776 28.932751  
C 12.868602 12.166424 28.887056  
C 14.282179 11.855092 28.882418  
C 15.140641 15.754877 30.166462  
C 13.714819 16.066774 30.168892  
C 11.896458 14.024578 30.157537  
C 12.311263 12.626733 30.128117  
C 14.983509 12.037556 30.123699  
C 15.939964 13.137960 30.153528  
C 13.014629 15.832230 31.407429  
C 12.072992 14.729526 31.400362  
C 12.860046 12.077923 31.327894  
C 14.257622 11.767570 31.325354  
C 16.062746 13.855699 31.394609  
C 15.667799 15.241355 31.403048  
C 11.935098 13.938716 32.633789  
C 12.427506 12.589793 32.624210

C 14.852500 12.071462 32.621277  
C 15.846919 13.093800 32.639309  
C 15.139762 15.820784 32.653408  
C 13.725613 16.164825 32.655285  
Ru 13.984047 14.134545 33.177876  
Ru 14.000996 14.045351 35.781780  
Ru 16.043400 12.992344 34.660843  
Ru 11.729198 13.861288 34.660824  
Ru 15.660351 15.622224 34.666222  
Ru 13.120547 16.173908 34.658085  
Ru 13.599686 11.951630 34.365719  
Ru 14.029244 13.938620 38.262672  
Ru 14.473857 16.192089 36.933693  
Ru 12.062110 15.100620 36.930717  
Ru 12.395821 12.459970 36.829964  
Ru 14.946103 11.960121 36.774258  
Ru 16.279140 14.226563 36.843723

06H60C13Rh

H 13.121243 16.529696 20.658941  
H 11.451130 14.673842 20.630426  
H 15.804462 15.956345 20.650492  
H 16.592999 13.587474 20.623659  
H 14.760189 11.547510 20.593863  
H 12.317225 12.061321 20.593447  
C 16.192083 14.045717 21.528656  
C 15.764593 15.331287 21.543571

C 12.913171 15.935677 21.549868  
C 12.006800 14.928388 21.533756  
C 12.921308 12.162010 21.496084  
C 14.247405 11.882906 21.496325  
C 15.096012 15.794230 22.765888  
C 13.719440 16.084848 22.767975  
C 11.926495 14.091731 22.737833  
C 12.367767 12.757071 22.718836  
C 14.993537 12.204988 22.718792  
C 15.936478 13.247828 22.735252  
C 13.014667 15.873861 24.009123  
C 12.041080 14.796053 23.993261  
C 12.885373 12.230765 23.958822  
C 14.307857 11.933361 23.958937  
C 16.117205 13.939074 23.990553  
C 15.661623 15.318468 24.006084  
C 11.882465 14.071243 25.206625  
C 12.335299 12.694434 25.185045  
C 14.997701 12.139987 25.185205  
C 15.972840 13.212272 25.205547  
C 15.121502 15.791025 25.235046  
C 13.702539 16.087778 25.236107  
C 12.895079 12.212440 26.416931  
C 14.291084 11.923527 26.416538  
C 16.093287 13.916503 26.454292  
C 15.648609 15.271070 26.466095  
C 13.015202 15.819800 26.468227

C 12.058508 14.762856 26.455566  
C 14.981606 12.123881 27.667845  
C 15.940732 13.189545 27.694550  
C 15.107500 15.748166 27.716307  
C 13.705795 16.036808 27.716747  
C 11.900808 14.036364 27.694654  
C 12.344169 12.672716 27.668812  
C 16.089718 13.882907 28.940195  
C 15.655668 15.264032 28.947435  
C 13.007379 15.815280 28.945845  
C 12.047419 14.730909 28.938839  
C 12.868173 12.143078 28.887716  
C 14.290779 11.846691 28.887232  
C 15.124027 15.770810 30.174746  
C 13.695210 16.067545 30.173332  
C 11.908056 13.995334 30.164555  
C 12.315002 12.601740 30.128414  
C 14.982483 12.042597 30.128052  
C 15.916759 13.153483 30.165714  
C 12.996907 15.825964 31.411135  
C 12.089359 14.696825 31.410563  
C 12.852695 12.031865 31.331806  
C 14.261086 11.735436 31.331406  
C 16.031048 13.866751 31.414062  
C 15.659622 15.266117 31.415087  
C 11.992053 13.896487 32.644588  
C 12.416989 12.531496 32.620598

C 14.858542 12.015587 32.621189  
C 15.796365 13.092996 32.648300  
C 15.138355 15.871634 32.654919  
C 13.714347 16.172901 32.652313  
Rh 14.040456 14.193450 33.177517  
Rh 13.994039 14.000668 35.678967  
Rh 16.150726 12.977454 34.615307  
Rh 11.611498 13.915132 34.608242  
Rh 15.716096 15.705007 34.628628  
Rh 13.096298 16.247328 34.618992  
Rh 13.556213 11.883523 34.205448  
Rh 13.966529 13.901860 38.302895  
Rh 14.457021 16.265488 36.832096  
Rh 12.106963 15.181975 36.839104  
Rh 12.371652 12.479487 36.822800  
Rh 14.882219 11.965702 36.830212  
Rh 16.187382 14.339591 36.851154

06H60C13Pd

H 13.137384 16.601044 20.713888  
H 11.469764 14.751195 20.650057  
H 15.791749 16.037163 20.701857  
H 16.566574 13.669531 20.624273  
H 14.757545 11.671514 20.550171  
H 12.315631 12.178699 20.559856  
C 16.183294 14.111526 21.544607  
C 15.761509 15.400059 21.586664

C 12.921207 16.001699 21.599007  
C 12.012407 14.994775 21.564274  
C 12.913958 12.242779 21.469458  
C 14.241657 11.967299 21.464304  
C 15.103771 15.845285 22.817715  
C 13.719739 16.138029 22.821781  
C 11.917724 14.140862 22.751694  
C 12.354413 12.799698 22.705805  
C 14.985874 12.248184 22.696175  
C 15.936227 13.291366 22.734825  
C 13.015367 15.898230 24.051083  
C 12.035981 14.819708 24.015436  
C 12.871310 12.250187 23.930962  
C 14.298701 11.954081 23.925575  
C 16.118628 13.955108 23.999542  
C 15.664287 15.338074 24.041056  
C 11.877775 14.070958 25.214611  
C 12.327558 12.696131 25.167152  
C 14.986158 12.139683 25.157545  
C 15.963833 13.205759 25.200548  
C 15.120636 15.781345 25.278532  
C 13.705340 16.077606 25.282509  
C 12.885349 12.189301 26.391924  
C 14.280835 11.898988 26.387796  
C 16.091125 13.882631 26.465059  
C 15.647235 15.238263 26.499472  
C 13.011917 15.793529 26.506533

C 12.050947 14.738583 26.477076  
C 14.972405 12.066404 27.642956  
C 15.940977 13.132844 27.690460  
C 15.102800 15.692482 27.752001  
C 13.700911 15.988331 27.754532  
C 11.884016 13.991220 27.700392  
C 12.329758 12.621042 27.650356  
C 16.082579 13.804996 28.943932  
C 15.647758 15.184593 28.972630  
C 12.997217 15.745751 28.976114  
C 12.035577 14.663627 28.950451  
C 12.854553 12.073707 28.856321  
C 14.277905 11.774301 28.852303  
C 15.104268 15.657949 30.204615  
C 13.686119 15.958632 30.206757  
C 11.903906 13.907563 30.166855  
C 12.312100 12.523667 30.106234  
C 14.962994 11.960911 30.100367  
C 15.896605 13.060666 30.160915  
C 12.981948 15.717023 31.449903  
C 12.070664 14.580373 31.434143  
C 12.837716 11.941064 31.313599  
C 14.252977 11.639357 31.311062  
C 16.017637 13.741925 31.430054  
C 15.647169 15.150799 31.448021  
C 11.925550 13.745787 32.639709  
C 12.352983 12.404633 32.573215

C 14.887631 11.862724 32.571049  
C 15.818865 12.919033 32.637207  
C 15.125220 15.799500 32.653725  
C 13.721034 16.095348 32.654106  
Pd 14.028598 14.077034 33.249363  
Pd 14.051737 14.229012 35.702892  
Pd 16.366787 13.300919 34.512787  
Pd 11.565302 14.301678 34.515293  
Pd 15.813401 15.977102 34.537525  
Pd 13.142572 16.534578 34.530952  
Pd 13.544364 11.772493 34.176098  
Pd 13.982271 13.876802 38.287453  
Pd 14.502765 16.432875 37.083122  
Pd 11.972776 15.274648 36.960892  
Pd 12.274685 12.494495 36.569092  
Pd 15.002974 11.933599 36.566830  
Pd 16.376513 14.369648 36.954887

06H60C13Ag

H 12.910225 16.561846 20.671654  
H 11.346176 14.625368 20.646896  
H 15.592504 16.147804 20.609203  
H 16.488014 13.823290 20.526096  
H 14.785542 11.707821 20.504667  
H 12.323263 12.083792 20.555979  
C 16.095791 14.247760 21.451281  
C 15.608413 15.512823 21.496227

C 12.741180 15.959417 21.565235  
C 11.887843 14.903947 21.551802  
C 12.932856 12.191997 21.453987  
C 14.273415 11.987348 21.426580  
C 14.947536 15.927441 22.738123  
C 13.552784 16.147354 22.769993  
C 11.864601 14.049044 22.742077  
C 12.368887 12.729660 22.695818  
C 15.028772 12.324551 22.637072  
C 15.918707 13.419950 22.649317  
C 12.885998 15.868483 24.015280  
C 11.970123 14.740384 24.000763  
C 12.947165 12.218861 23.911985  
C 14.385257 11.993746 23.881531  
C 16.082355 14.101954 23.906336  
C 15.560015 15.459168 23.954012  
C 11.881069 13.988729 25.206940  
C 12.405432 12.640510 25.160076  
C 15.086257 12.223203 25.098932  
C 15.996756 13.349562 25.113205  
C 15.015615 15.874687 25.201113  
C 13.586223 16.098238 25.234560  
C 13.010322 12.167884 26.373537  
C 14.421313 11.947530 26.343481  
C 16.110998 14.035866 26.370106  
C 15.594277 15.366025 26.414141  
C 12.935457 15.783622 26.473848



C 12.037061 14.673780 26.459518  
C 15.125837 12.162350 27.580950  
C 16.033859 13.278290 27.597155  
C 15.054575 15.797908 27.678493  
C 13.636596 16.020138 27.712872  
C 11.938351 13.921974 27.685661  
C 12.455564 12.583833 27.639294  
C 16.169445 13.965509 28.840530  
C 15.659664 15.320129 28.884480  
C 12.973973 15.732574 28.944771  
C 12.052765 14.616891 28.931799  
C 13.039093 12.089458 28.846844  
C 14.465455 11.852853 28.812754  
C 15.113489 15.740311 30.133562  
C 13.682522 15.953472 30.170454  
C 11.970207 13.871103 30.146328  
C 12.494332 12.522176 30.101357  
C 15.157126 12.085081 30.045044  
C 16.064262 13.215626 30.062265  
C 13.031413 15.669683 31.429943  
C 12.127172 14.549694 31.416664  
C 13.068570 12.018542 31.329618  
C 14.476742 11.782549 31.292324  
C 16.222311 13.918836 31.320278  
C 15.697083 15.248455 31.364290  
C 11.894188 13.703154 32.583328  
C 12.375766 12.381611 32.557144

C 15.305020 12.025153 32.444233  
C 16.179867 13.035607 32.467197  
C 15.162930 15.821322 32.577854  
C 13.782335 16.105564 32.615623  
Ag 13.951185 13.991892 33.516659  
Ag 13.903069 14.024816 36.160011  
Ag 15.944166 12.405340 34.633064  
Ag 11.337803 14.221666 34.674004  
Ag 16.142387 15.354823 34.528194  
Ag 13.147423 16.525713 34.684219  
Ag 13.069696 11.552898 34.494141  
Ag 14.062165 13.880424 38.850662  
Ag 14.706364 16.361420 37.200508  
Ag 11.956043 15.596555 37.127022  
Ag 11.784216 12.744534 37.200012  
Ag 14.533297 11.528879 36.935303  
Ag 16.473471 13.937749 36.971718

06H60C13Cd

H 13.111872 16.572090 20.589478  
H 11.421680 14.728699 20.544762  
H 15.840210 15.991576 20.577173  
H 16.608141 13.611656 20.520050  
H 14.724245 11.552197 20.463516  
H 12.278021 12.071537 20.478136  
C 16.189053 14.058001 21.423260  
C 15.773087 15.345352 21.453585

C 12.911160 15.956877 21.467773  
C 11.995833 14.958952 21.443422  
C 12.891460 12.176851 21.374163  
C 14.216957 11.895926 21.366167  
C 15.095250 15.790292 22.680447  
C 13.725237 16.079191 22.686447  
C 11.918844 14.104136 22.637856  
C 12.348889 12.772567 22.604202  
C 14.968322 12.213601 22.589310  
C 15.914627 13.245322 22.617971  
C 13.018266 15.860285 23.931059  
C 12.037870 14.795071 23.904812  
C 12.867600 12.227713 23.841198  
C 14.283996 11.925667 23.832678  
C 16.109142 13.918552 23.885639  
C 15.662834 15.297262 23.918293  
C 11.869622 14.059325 25.110416  
C 12.318954 12.676308 25.073837  
C 14.981707 12.103699 25.059023  
C 15.965830 13.174618 25.090200  
C 15.129844 15.759173 25.153841  
C 13.707624 16.062403 25.160336  
C 12.882823 12.179447 26.294359  
C 14.274357 11.879752 26.286819  
C 16.087669 13.860603 26.346272  
C 15.649020 15.214569 26.377375  
C 13.021296 15.781468 26.389313

C 12.058394 14.732891 26.364105  
C 14.969262 12.059423 27.544344  
C 15.934324 13.111849 27.580643  
C 15.109078 15.672051 27.642408  
C 13.714375 15.973443 27.648207  
C 11.897428 13.987463 27.597900  
C 12.336423 12.629903 27.556404  
C 16.114653 13.784185 28.835247  
C 15.672155 15.170370 28.862621  
C 13.005092 15.749999 28.873772  
C 12.024744 14.673049 28.851656  
C 12.853294 12.074715 28.768692  
C 14.278522 11.768929 28.763159  
C 15.116558 15.612817 30.096550  
C 13.705010 15.919362 30.101604  
C 11.893807 13.920350 30.058544  
C 12.315952 12.540533 30.004143  
C 14.967860 11.970272 29.995361  
C 15.928901 13.045425 30.045107  
C 13.023872 15.632957 31.353373  
C 12.097426 14.576507 31.343836  
C 12.875401 12.033099 31.232914  
C 14.254531 11.737852 31.227219  
C 16.028423 13.723987 31.332050  
C 15.626148 15.070141 31.345194  
C 11.857370 13.755745 32.545223  
C 12.286550 12.459406 32.483047

C 14.976271 11.881088 32.470879  
C 15.909468 12.873981 32.532681  
C 15.109885 15.738120 32.542362  
C 13.775423 16.023699 32.547783  
Cd 14.017461 14.267461 34.455326  
Cd 13.787622 13.656339 38.466145  
Cd 16.924147 13.046207 34.518150  
Cd 10.907707 14.340391 34.487888  
Cd 16.418245 16.152830 34.403515  
Cd 12.731822 16.987883 34.396679  
Cd 13.476516 11.407667 34.134804  
Cd 14.305604 15.173379 40.867336  
Cd 14.483110 16.588535 38.019905  
Cd 11.983149 15.603748 36.883034  
Cd 12.022980 12.452693 36.537277  
Cd 15.075461 11.873412 36.598846  
Cd 16.348232 14.645101 36.910892

06H60C13Lu

H 13.306629 16.210443 20.512396  
H 11.728065 14.289663 20.502081  
H 15.956099 15.785423 20.700974  
H 16.847980 13.471482 20.866476  
H 15.142838 11.409794 20.842232  
H 12.697262 11.809742 20.667255  
C 16.391880 13.962420 21.727474  
C 15.904210 15.226785 21.636559

C 13.049770 15.686670 21.434502  
C 12.187457 14.637462 21.428492  
C 13.224249 11.951463 21.611931  
C 14.562000 11.731737 21.707731  
C 15.154537 15.741868 22.784315  
C 13.756321 15.971588 22.685387  
C 12.046025 13.882401 22.674339  
C 12.556138 12.558821 22.764065  
C 15.219988 12.125772 22.954607  
C 16.121258 13.223650 22.963507  
C 12.986376 15.798498 23.882238  
C 12.059191 14.662274 23.875641  
C 13.026123 12.132497 24.047903  
C 14.467474 11.895195 24.152241  
C 16.184448 13.994476 24.168715  
C 15.658855 15.358549 24.069939  
C 11.882862 13.998767 25.121407  
C 12.396221 12.654048 25.212267  
C 15.060458 12.218613 25.406118  
C 15.973290 13.336247 25.414017  
C 15.011975 15.858135 25.234421  
C 13.591239 16.091732 25.135916  
C 12.888149 12.261907 26.508556  
C 14.292872 12.032516 26.613340  
C 15.994373 14.112361 26.628706  
C 15.486872 15.442976 26.529804  
C 12.839640 15.871320 26.348204

C 11.935135 14.768795 26.340685  
C 14.905848 12.318435 27.883966  
C 15.828512 13.442145 27.892040  
C 14.863124 15.981353 27.705561  
C 13.432181 16.214777 27.611788  
C 11.707284 14.107024 27.597235  
C 12.223687 12.751760 27.684032  
C 15.872999 14.217506 29.085012  
C 15.357291 15.579943 28.975586  
C 12.670280 16.012106 28.798241  
C 11.745395 14.884312 28.791672  
C 12.706273 12.337800 28.954832  
C 14.145596 12.111015 29.070229  
C 14.685719 16.063749 30.141031  
C 13.285854 16.270508 30.067471  
C 11.607974 14.218570 30.055836  
C 12.089990 12.887499 30.121588  
C 14.739923 12.450400 30.334324  
C 15.650494 13.557831 30.343027  
C 12.528583 16.122200 31.329073  
C 11.595253 14.979236 31.323978  
C 12.545754 12.457602 31.440273  
C 13.977246 12.250840 31.566532  
C 15.685001 14.335911 31.580719  
C 15.190563 15.695056 31.459293  
C 11.140054 14.200799 32.471420  
C 11.670944 12.816185 32.547882

C 14.694730 12.416650 32.857304  
C 15.655672 13.591513 32.865963  
C 14.656558 16.476767 32.566135  
C 13.195169 16.718418 32.481377  
Lu 13.403725 14.449429 32.984413  
Lu 14.886403 13.242190 35.388588  
Lu 16.796778 11.685519 33.614147  
Lu 10.705647 13.354221 34.522724  
Lu 16.553314 15.550064 33.711681  
Lu 13.928819 17.316402 34.533684  
Lu 12.962090 11.141106 33.694668  
Lu 14.904121 13.226580 38.588921  
Lu 15.811976 15.926294 36.963036  
Lu 12.691005 15.024349 36.828575  
Lu 12.445934 11.785241 36.950287  
Lu 15.590189 10.543344 36.730179  
Lu 17.677788 13.121264 36.731232

06H60C13Hf

H 13.176477 16.331602 20.534027  
H 11.591708 14.406088 20.523445  
H 15.895604 15.905863 20.651215  
H 16.770800 13.570003 20.734413  
H 15.021391 11.448213 20.715933  
H 12.559839 11.842694 20.616148  
C 16.313570 14.038871 21.606989  
C 15.838452 15.307585 21.561707

C 12.962718 15.765277 21.441765  
C 12.101330 14.718487 21.435984  
C 13.125365 11.999723 21.535547  
C 14.462813 11.786559 21.589840  
C 15.103346 15.783898 22.739166  
C 13.714216 16.006071 22.680468  
C 12.007631 13.926595 22.668507  
C 12.503447 12.609264 22.716564  
C 15.153688 12.181954 22.822550  
C 16.046932 13.270879 22.830299  
C 12.973390 15.811098 23.901777  
C 12.050699 14.683158 23.894630  
C 13.004723 12.151257 23.987589  
C 14.439827 11.917709 24.045534  
C 16.155916 14.012465 24.061024  
C 15.642842 15.374632 24.012131  
C 11.890290 13.994378 25.127975  
C 12.397412 12.638178 25.178085  
C 15.072137 12.202173 25.287195  
C 15.989424 13.324945 25.295153  
C 15.037617 15.864123 25.202312  
C 13.607471 16.095436 25.142853  
C 12.927038 12.217713 26.447868  
C 14.333401 11.993274 26.503040  
C 16.036341 14.078818 26.518019  
C 15.542471 15.414358 26.472157  
C 12.892179 15.839875 26.364597

C 11.990305 14.735389 26.356951  
C 14.970598 12.273950 27.766453  
C 15.879127 13.386031 27.774176  
C 14.947902 15.922425 27.685562  
C 13.527732 16.141356 27.625341  
C 11.809258 14.042475 27.609274  
C 12.303273 12.692345 27.660507  
C 15.983552 14.133538 28.989727  
C 15.488337 15.511200 28.944883  
C 12.797166 15.920859 28.832987  
C 11.869659 14.791178 28.824373  
C 12.800262 12.231349 28.920874  
C 14.248383 12.014799 28.975159  
C 14.860613 15.984579 30.137625  
C 13.445222 16.180548 30.076725  
C 11.733101 14.093558 30.060865  
C 12.203670 12.743773 30.114660  
C 14.877430 12.334618 30.212646  
C 15.786386 13.443602 30.220039  
C 12.721476 15.964342 31.334015  
C 11.796424 14.832996 31.326231  
C 12.716075 12.306326 31.423796  
C 14.148765 12.087284 31.462111  
C 15.878517 14.197108 31.476982  
C 15.381650 15.558523 31.445694  
C 11.422302 14.089191 32.518177  
C 11.963747 12.702477 32.638870

C 14.891212 12.200583 32.718987  
C 15.903765 13.436733 32.727364  
C 14.832355 16.211658 32.659996  
C 13.368656 16.470957 32.532951  
Hf 13.745937 14.173326 32.646408  
Hf 14.182763 13.803351 35.742920  
Hf 16.322353 12.059241 34.365715  
Hf 11.463312 13.765060 34.620068  
Hf 16.325911 15.211957 34.246960  
Hf 13.685501 16.484039 34.636238  
Hf 13.235071 11.430453 34.228794  
Hf 14.469000 13.557757 38.566074  
Hf 15.312289 16.046000 37.099030  
Hf 12.431145 15.228612 37.320518  
Hf 12.204767 12.243774 37.081196  
Hf 14.910616 11.254601 36.767746  
Hf 16.821911 13.592859 36.777832

06H60C13Ta

H 13.189339 16.385719 20.571623  
H 11.555971 14.500795 20.568470  
H 15.861938 15.864104 20.633984  
H 16.680159 13.511716 20.693878  
H 14.905441 11.463189 20.691744  
H 12.459250 11.935005 20.626568  
C 16.265844 13.990511 21.582365  
C 15.821681 15.272031 21.549347

C 12.969349 15.822130 21.479427  
C 12.080961 14.796902 21.477753  
C 13.037494 12.057757 21.543346  
C 14.368546 11.800838 21.579245  
C 15.128405 15.767235 22.742466  
C 13.741662 16.032587 22.708658  
C 11.979008 14.000826 22.706100  
C 12.443461 12.667990 22.738426  
C 15.086532 12.157578 22.807606  
C 16.012096 13.225105 22.808157  
C 13.016008 15.845881 23.937229  
C 12.061252 14.742483 23.936279  
C 12.944688 12.181669 23.997139  
C 14.380033 11.907972 24.032789  
C 16.156027 13.957037 24.035622  
C 15.675881 15.335954 24.000586  
C 11.906362 14.048594 25.169056  
C 12.376209 12.679934 25.201378  
C 15.036890 12.173274 25.265387  
C 15.983647 13.267061 25.266710  
C 15.098846 15.830185 25.202484  
C 13.676908 16.102200 25.170277  
C 12.915592 12.236814 26.463017  
C 14.316492 11.972183 26.494915  
C 16.072535 14.010808 26.495661  
C 15.607038 15.358280 26.461975  
C 12.970106 15.860119 26.402912

C 12.044584 14.778502 26.402233  
C 14.991244 12.212403 27.743170  
C 15.928099 13.310147 27.743731  
C 15.040546 15.871518 27.683592  
C 13.625611 16.146193 27.658325  
C 11.864674 14.085479 27.656464  
C 12.332311 12.718872 27.688261  
C 16.061308 14.045693 28.960625  
C 15.584286 15.430794 28.926350  
C 12.902555 15.953076 28.876844  
C 11.957070 14.828093 28.869522  
C 12.852955 12.242607 28.931894  
C 14.289744 11.971097 28.963171  
C 14.982456 15.912642 30.124710  
C 13.583704 16.186247 30.110680  
C 11.842657 14.118679 30.100050  
C 12.295577 12.767065 30.137306  
C 14.968476 12.243794 30.191772  
C 15.892214 13.341746 30.189114  
C 12.894391 15.957661 31.396864  
C 11.956430 14.850289 31.366562  
C 12.838174 12.330154 31.430161  
C 14.263283 12.040948 31.454359  
C 15.996731 14.089959 31.439148  
C 15.500368 15.448632 31.408634  
C 11.536424 14.124497 32.551819  
C 12.100430 12.709152 32.655155

C 14.980055 12.178520 32.728447  
C 15.990561 13.382237 32.721657  
C 15.042274 16.091053 32.656342  
C 13.553727 16.386688 32.646160  
Ta 13.887704 14.163313 32.640656  
Ta 14.047770 13.815834 35.495491  
Ta 16.192936 12.335167 34.595226  
Ta 11.440449 13.769084 34.579113  
Ta 15.976248 15.220362 34.385990  
Ta 12.939745 16.146858 34.693382  
Ta 13.353918 11.689030 34.215706  
Ta 14.152950 13.683916 38.328762  
Ta 14.744235 15.984542 36.867355  
Ta 12.083622 14.969324 37.092056  
Ta 12.275038 12.277326 36.866615  
Ta 14.936920 11.588793 36.901958  
Ta 16.493896 13.839543 36.881981

06H60C13W

H 13.215847 16.565403 20.614382  
H 11.594007 14.668049 20.533136  
H 15.922308 16.065397 20.693102  
H 16.748503 13.707079 20.678093  
H 14.960219 11.604292 20.588531  
H 12.500661 12.054571 20.522476  
C 16.306448 14.152476 21.570459  
C 15.859324 15.431383 21.578642

C 12.998000 15.962172 21.496918  
C 12.118311 14.932699 21.452711  
C 13.082026 12.179874 21.437147  
C 14.413867 11.937123 21.472326  
C 15.141273 15.872909 22.780386  
C 13.761801 16.128609 22.740154  
C 12.019897 14.091219 22.652927  
C 12.485726 12.766675 22.646906  
C 15.116814 12.277938 22.718420  
C 16.027044 13.345248 22.764938  
C 13.023112 15.900279 23.960381  
C 12.082805 14.795198 23.912880  
C 12.974258 12.241184 23.900101  
C 14.406565 11.975533 23.939274  
C 16.159729 14.032850 24.029305  
C 15.677085 15.401831 24.037365  
C 11.900511 14.062247 25.118080  
C 12.381352 12.691564 25.109192  
C 15.053781 12.192275 25.184511  
C 15.996937 13.295636 25.234337  
C 15.094589 15.860581 25.250189  
C 13.667447 16.129490 25.207823  
C 12.916162 12.217974 26.357801  
C 14.316351 11.957045 26.397184  
C 16.061754 13.996651 26.486036  
C 15.590277 15.338191 26.493095  
C 12.950280 15.834027 26.414789

C 12.025366 14.753346 26.370678  
C 14.966087 12.164242 27.669773  
C 15.897085 13.258206 27.720890  
C 15.003399 15.801973 27.732227  
C 13.600435 16.059029 27.687592  
C 11.840155 14.016885 27.604256  
C 12.315124 12.658797 27.592583  
C 15.998890 13.949980 28.962128  
C 15.540239 15.332961 28.975914  
C 12.870936 15.820884 28.894403  
C 11.935031 14.704556 28.848055  
C 12.817111 12.137521 28.824150  
C 14.239007 11.878465 28.865492  
C 14.950915 15.809045 30.185280  
C 13.535400 16.051029 30.129078  
C 11.788838 13.962804 30.062201  
C 12.221625 12.576607 30.061007  
C 14.882354 12.093428 30.135670  
C 15.783031 13.226615 30.174744  
C 12.823013 15.783108 31.370640  
C 11.917889 14.664907 31.312721  
C 12.740464 12.052724 31.290812  
C 14.142314 11.790109 31.328949  
C 15.848551 13.937769 31.423588  
C 15.440891 15.317333 31.476109  
C 11.640021 13.896107 32.526112  
C 12.209106 12.531020 32.589191



C 14.788556 12.018050 32.631313  
C 15.732334 13.101027 32.603523  
C 14.954010 15.962599 32.736607  
C 13.439863 16.281984 32.603436  
W 13.775732 14.205611 33.182648  
W 13.784266 14.076167 36.245300  
W 15.684608 12.919217 34.643646  
W 11.569195 13.836158 34.560677  
W 15.688069 15.485708 34.877644  
W 13.320314 16.346731 34.662037  
W 13.203423 11.907608 34.543602  
W 14.909852 13.359081 38.484055  
W 15.457335 15.821670 37.315453  
W 11.774151 15.510832 36.359959  
W 12.653242 11.837642 36.945396  
W 15.015235 11.558073 36.907436  
W 16.751459 13.876722 36.909046

06H60C13Re

H 13.025400 16.615610 20.724604  
H 11.418797 14.710779 20.668068  
H 15.693081 16.141394 20.684998  
H 16.528442 13.792078 20.583982  
H 14.768089 11.690720 20.526937  
H 12.308603 12.130041 20.566690  
C 16.134121 14.218075 21.507309  
C 15.680813 15.494069 21.562860

C 12.832061 16.008221 21.609699  
C 11.957644 14.972126 21.579729  
C 12.922989 12.234108 21.461895  
C 14.256323 11.995349 21.440695  
C 15.019993 15.911181 22.804335  
C 13.634113 16.161154 22.826763  
C 11.897985 14.110258 22.764330  
C 12.368453 12.783885 22.707340  
C 15.006596 12.311198 22.663778  
C 15.916979 13.384199 22.695587  
C 12.947459 15.894567 24.066046  
C 12.006469 14.786592 24.034151  
C 12.909862 12.237953 23.925169  
C 14.347254 11.981098 23.901888  
C 16.099493 14.044659 23.964256  
C 15.609289 15.413900 24.022526  
C 11.879423 14.027007 25.230709  
C 12.370634 12.664131 25.167339  
C 15.045195 12.178129 25.122257  
C 15.987413 13.278688 25.157969  
C 15.069118 15.832094 25.268085  
C 13.642872 16.092360 25.291098  
C 12.960549 12.168299 26.381638  
C 14.363045 11.911777 26.360916  
C 16.106152 13.948151 26.426107  
C 15.621062 15.284893 26.476929  
C 12.974335 15.771255 26.520153

C 12.048806 14.691669 26.493488  
C 15.070759 12.079515 27.604517  
C 16.009846 13.178749 27.649590  
C 15.081613 15.712042 27.743982  
C 13.674356 15.972174 27.768463  
C 11.914045 13.929099 27.718460  
C 12.407620 12.577030 27.645685  
C 16.150394 13.839219 28.903160  
C 15.664621 15.208182 28.947857  
C 12.989660 15.710371 28.995861  
C 12.051208 14.594713 28.971247  
C 12.972830 12.042529 28.838570  
C 14.394224 11.775383 28.819973  
C 15.113451 15.653002 30.181807  
C 13.704529 15.902022 30.207226  
C 11.967927 13.828810 30.179552  
C 12.418781 12.456573 30.100775  
C 15.092686 11.949606 30.075581  
C 16.001682 13.083408 30.123680  
C 13.040201 15.634981 31.487545  
C 12.119985 14.504902 31.457664  
C 12.982838 11.887313 31.278564  
C 14.386615 11.615663 31.268326  
C 16.106659 13.774658 31.379776  
C 15.664880 15.153277 31.429665  
C 11.914356 13.681046 32.672672  
C 12.537344 12.357533 32.583504

C 14.969137 11.913560 32.580616  
C 15.914685 12.991469 32.601120  
C 15.241270 15.828429 32.670338  
C 13.731467 16.166752 32.692181  
Re 14.035336 14.074722 33.099838  
Re 13.896416 14.066325 35.695515  
Re 15.863882 12.924606 34.672810  
Re 11.585158 13.805639 34.769508  
Re 15.868371 15.691422 34.680107  
Re 13.356267 16.348795 34.750500  
Re 13.526735 11.875912 34.372841  
Re 13.135183 14.349669 38.048347  
Re 14.711531 16.184422 36.874046  
Re 11.729220 15.598376 36.403362  
Re 12.348151 12.361368 36.637978  
Re 14.853820 12.590738 37.517273  
Re 16.441341 14.254323 36.709599

06H60C13Os

H 13.095286 16.621231 20.706209  
H 11.409253 14.772566 20.666189  
H 15.830919 16.025230 20.675436  
H 16.590454 13.641443 20.606812  
H 14.709224 11.579962 20.562626  
H 12.262437 12.109804 20.588303  
C 16.178104 14.087548 21.512697  
C 15.767954 15.376831 21.550432

C 12.903840 15.999885 21.582045  
C 11.991964 14.999712 21.559841  
C 12.882670 12.212684 21.479704  
C 14.205462 11.926639 21.465851  
C 15.094669 15.819597 22.779791  
C 13.729048 16.114868 22.793800  
C 11.927779 14.142444 22.751957  
C 12.352121 12.812270 22.714163  
C 14.961756 12.244584 22.686855  
C 15.904858 13.276062 22.708628  
C 13.030455 15.895247 24.044937  
C 12.056846 14.831187 24.022163  
C 12.872061 12.264093 23.951904  
C 14.285059 11.959628 23.936653  
C 16.103987 13.947948 23.979420  
C 15.663510 15.321827 24.018042  
C 11.886003 14.095189 25.228750  
C 12.329114 12.711216 25.188046  
C 14.990663 12.134259 25.160442  
C 15.974634 13.203120 25.186806  
C 15.143833 15.794010 25.256454  
C 13.723357 16.104279 25.270252  
C 12.896814 12.213923 26.407034  
C 14.292722 11.910498 26.393280  
C 16.111507 13.891847 26.438608  
C 15.671866 15.248830 26.470522  
C 13.037928 15.826401 26.495718

C 12.073555 14.774956 26.477076  
C 14.993652 12.099856 27.642073  
C 15.957802 13.150935 27.674458  
C 15.129929 15.701465 27.730692  
C 13.741545 16.008266 27.743765  
C 11.927553 14.033096 27.712803  
C 12.363795 12.676242 27.666401  
C 16.129211 13.827077 28.932438  
C 15.686388 15.202700 28.955324  
C 13.042789 15.787877 28.977526  
C 12.070234 14.717883 28.966547  
C 12.898223 12.142354 28.884975  
C 14.305501 11.829021 28.872545  
C 15.171484 15.712539 30.184755  
C 13.737491 16.021235 30.197807  
C 11.916897 13.982000 30.188038  
C 12.338586 12.582804 30.132849  
C 15.017529 11.986780 30.112503  
C 15.977448 13.089104 30.155268  
C 13.042866 15.777697 31.437836  
C 12.106045 14.667774 31.438267  
C 12.898876 12.014819 31.310215  
C 14.287428 11.690605 31.298428  
C 16.082556 13.801350 31.397493  
C 15.711821 15.191634 31.407558  
C 11.986373 13.854976 32.690331  
C 12.504004 12.510735 32.627129

C 14.849882 11.994208 32.617172  
C 15.811245 13.060134 32.653801  
C 15.209144 15.780380 32.674957  
C 13.775162 16.156048 32.675591  
Os 14.024338 14.150542 33.294968  
Os 14.035229 13.993371 35.802383  
Os 16.054762 12.826833 34.772453  
Os 11.662591 13.640947 34.775791  
Os 15.869521 15.461807 34.689102  
Os 13.466681 16.350143 34.757286  
Os 13.660634 11.855761 34.359848  
Os 12.742267 14.799913 37.789280  
Os 14.739485 16.071909 36.992592  
Os 11.530446 15.659473 35.927017  
Os 12.448565 12.463585 36.920383  
Os 14.868606 11.790021 36.748688  
Os 16.283710 13.992284 36.893219

06H60C13Ir

H 13.138644 16.567989 20.666668  
H 11.453070 14.725585 20.628853  
H 15.820331 15.978150 20.657423  
H 16.577175 13.597969 20.610693  
H 14.723948 11.574199 20.565281  
H 12.282607 12.103210 20.574541  
C 16.181227 14.054090 21.518763  
C 15.770595 15.344567 21.543945

C 12.927088 15.969505 21.553585  
C 12.012331 14.970008 21.532885  
C 12.890356 12.192892 21.475739  
C 14.214913 11.907038 21.470680  
C 15.106454 15.804177 22.770121  
C 13.733981 16.104546 22.773399  
C 11.924817 14.127148 22.731995  
C 12.346848 12.787212 22.704355  
C 14.965195 12.215517 22.694939  
C 15.915052 13.250570 22.719255  
C 13.028826 15.891601 24.015484  
C 12.048029 14.821898 23.993286  
C 12.861372 12.247132 23.941217  
C 14.281363 11.937834 23.936329  
C 16.106615 13.928323 23.981022  
C 15.667909 15.312292 24.007488  
C 11.881002 14.090653 25.202133  
C 12.319650 12.708830 25.171881  
C 14.975439 12.127385 25.163176  
C 15.957570 13.192517 25.190325  
C 15.135759 15.782108 25.239618  
C 13.719089 16.093355 25.243250  
C 12.876750 12.214447 26.400103  
C 14.270264 11.908619 26.396185  
C 16.089186 13.885465 26.443651  
C 15.656263 15.242715 26.464773  
C 13.029280 15.822507 26.472126

C 12.063704 14.774096 26.453522  
C 14.965452 12.094700 27.647087  
C 15.935287 13.149977 27.680552  
C 15.119774 15.712347 27.718822  
C 13.722816 16.021009 27.722147  
C 11.899261 14.041569 27.689034  
C 12.331966 12.675489 27.653635  
C 16.094873 13.831919 28.931623  
C 15.664423 15.213544 28.944384  
C 13.022985 15.799894 28.948874  
C 12.048967 14.728290 28.937780  
C 12.854877 12.139347 28.871784  
C 14.272071 11.826571 28.869249  
C 15.143315 15.722582 30.173407  
C 13.715393 16.038916 30.174715  
C 11.900511 13.992071 30.161835  
C 12.299911 12.592896 30.114498  
C 14.969073 12.002388 30.112055  
C 15.921309 13.101498 30.157461  
C 13.011784 15.809223 31.408703  
C 12.088396 14.686659 31.410110  
C 12.838582 12.014965 31.306841  
C 14.237158 11.705912 31.306646  
C 16.042595 13.808490 31.408405  
C 15.681706 15.214723 31.408659  
C 11.969235 13.880754 32.659019  
C 12.417650 12.505446 32.609867

C 14.822221 11.972877 32.611092  
C 15.810364 13.029046 32.660065  
C 15.181055 15.862814 32.654060  
C 13.737090 16.185783 32.652191  
Ir 14.052561 14.195069 33.175827  
Ir 14.008231 14.032354 35.697018  
Ir 16.153759 13.018180 34.693169  
Ir 11.639203 14.011489 34.687145  
Ir 15.745378 15.704669 34.668938  
Ir 13.142712 16.278938 34.661385  
Ir 13.540254 11.886483 34.227417  
Ir 13.989598 13.974548 38.325256  
Ir 14.474407 16.161465 36.923599  
Ir 12.084940 15.248158 36.888077  
Ir 12.344899 12.551541 36.818584  
Ir 14.892100 11.991755 36.823273  
Ir 16.259157 14.327501 36.897026

06H60C13Pt

H 13.262458 16.613527 20.737547  
H 11.580323 14.771955 20.633867  
H 15.892629 16.003759 20.773832  
H 16.654135 13.631763 20.716398  
H 14.842607 11.627208 20.613945  
H 12.410126 12.176217 20.566431  
C 16.259823 14.079429 21.629391  
C 15.845045 15.370193 21.660297

C 13.023338 16.009480 21.613487  
C 12.109069 15.010307 21.557589  
C 12.990708 12.241486 21.487520  
C 14.312745 11.943354 21.513248  
C 15.166657 15.822796 22.878967  
C 13.790039 16.135878 22.857140  
C 11.984047 14.155590 22.744768  
C 12.413372 12.814011 22.709219  
C 15.034685 12.224797 22.759714  
C 15.989474 13.262940 22.817236  
C 13.056808 15.903751 24.071962  
C 12.068685 14.832025 24.014780  
C 12.897321 12.258080 23.947287  
C 14.319315 11.943375 23.974865  
C 16.148632 13.931115 24.083714  
C 15.700419 15.316552 24.115524  
C 11.881789 14.082815 25.208242  
C 12.327291 12.703858 25.169567  
C 14.982392 12.126001 25.220425  
C 15.965445 13.186849 25.283461  
C 15.136044 15.765596 25.343206  
C 13.722393 16.074896 25.316551  
C 12.857419 12.194969 26.404720  
C 14.247204 11.893689 26.431379  
C 16.067169 13.863916 26.550442  
C 15.631637 15.220050 26.578072  
C 13.003418 15.790467 26.527792

C 12.033961 14.746914 26.478518  
C 14.913737 12.056641 27.702030  
C 15.886164 13.111220 27.773434  
C 15.064246 15.674767 27.826296  
C 13.663568 15.978856 27.793921  
C 11.829109 13.998733 27.699169  
C 12.272395 12.624800 27.653351  
C 16.022209 13.775322 29.037172  
C 15.584480 15.162272 29.058285  
C 12.923870 15.742026 28.992741  
C 11.944590 14.669745 28.954500  
C 12.767551 12.078063 28.865402  
C 14.194368 11.763923 28.896332  
C 14.996668 15.610008 30.278130  
C 13.591146 15.911555 30.235491  
C 11.793657 13.914311 30.168859  
C 12.200912 12.541787 30.099987  
C 14.851997 11.954550 30.149698  
C 15.804617 13.027691 30.240929  
C 12.852486 15.667323 31.458115  
C 11.929499 14.576006 31.460180  
C 12.703197 11.989349 31.320593  
C 14.103462 11.671701 31.351040  
C 15.871159 13.711013 31.528522  
C 15.461685 15.056457 31.534605  
C 11.756934 13.780414 32.684853  
C 12.203499 12.452182 32.574730

C 14.667758 11.882931 32.630630  
C 15.668257 12.910063 32.770260  
C 14.904533 15.646008 32.773434  
C 13.549590 16.109875 32.649494  
Pt 14.623301 14.136378 34.232292  
Pt 13.728444 13.551201 36.919281  
Pt 17.074242 12.446049 34.100597  
Pt 11.820527 14.471091 34.558899  
Pt 16.121071 16.368008 34.231335  
Pt 12.502106 16.897980 34.032520  
Pt 13.361605 11.884535 34.144066  
Pt 15.403800 15.265364 37.835110  
Pt 14.128116 16.302465 35.906284  
Pt 11.974015 15.451562 36.974686  
Pt 11.660984 12.347336 36.027809  
Pt 15.369335 11.824965 36.002411  
Pt 16.646488 14.273868 35.881420

06H60C13Au

H 13.306984 16.784075 20.719231  
H 11.652316 14.924625 20.515837  
H 15.976724 16.211655 20.797123  
H 16.781397 13.854062 20.683561  
H 14.981208 11.825500 20.463793  
H 12.541868 12.335307 20.379412  
C 16.348345 14.263314 21.597260  
C 15.909517 15.544821 21.657549

C 13.063494 16.141735 21.566406  
C 12.165668 15.132189 21.455603  
C 13.100137 12.378168 21.315660  
C 14.426781 12.101470 21.361471  
C 15.186415 15.941751 22.870962  
C 13.809513 16.230366 22.826656  
C 12.035764 14.232056 22.610287  
C 12.485903 12.899815 22.541628  
C 15.115158 12.356690 22.633427  
C 16.050072 13.403466 22.747620  
C 13.052213 15.943310 24.021255  
C 12.085435 14.867127 23.905262  
C 12.954332 12.312775 23.774700  
C 14.374702 12.016400 23.822460  
C 16.161818 14.032296 24.041718  
C 15.700682 15.406035 24.107597  
C 11.879988 14.075617 25.073563  
C 12.346103 12.705174 25.000526  
C 15.008117 12.161269 25.089809  
C 15.967535 13.239721 25.209278  
C 15.102766 15.810277 25.335632  
C 13.683118 16.096140 25.287716  
C 12.854153 12.158394 26.228317  
C 14.252298 11.874295 26.273506  
C 16.031891 13.876562 26.496407  
C 15.576499 15.228635 26.559179  
C 12.940748 15.762580 26.469879

C 11.992496 14.700273 26.361670  
C 14.889353 12.013665 27.560013  
C 15.840534 13.078710 27.686022  
C 14.969340 15.627588 27.807119  
C 13.570299 15.919493 27.755783  
C 11.790421 13.905721 27.554264  
C 12.244201 12.546530 27.477383  
C 15.933431 13.710623 28.973818  
C 15.470588 15.076977 29.032658  
C 12.812188 15.625632 28.934547  
C 11.857531 14.544695 28.835642  
C 12.733685 11.976130 28.695393  
C 14.147488 11.679396 28.735336  
C 14.861070 15.475240 30.259649  
C 13.446967 15.777183 30.198183  
C 11.682098 13.755284 30.021606  
C 12.133005 12.388267 29.933647  
C 14.791133 11.825354 30.007765  
C 15.716019 12.927156 30.152142  
C 12.695931 15.482388 31.395853  
C 11.784161 14.387896 31.322580  
C 12.647847 11.825055 31.146212  
C 14.030175 11.512497 31.176826  
C 15.775089 13.563617 31.460211  
C 15.334435 14.920036 31.511528  
C 11.618636 13.556144 32.510296  
C 12.103618 12.277287 32.398827

C 14.649076 11.728815 32.448551  
C 15.617452 12.671218 32.615688  
C 14.732408 15.550758 32.690697  
C 13.415441 15.861290 32.596199  
Au 15.615737 13.067657 37.289833  
Au 15.367123 15.772228 37.372704  
Au 16.122629 13.040240 34.550644  
Au 11.673050 14.132548 34.493217  
Au 15.601586 15.806275 34.538902  
Au 12.561810 16.695089 34.236755  
Au 13.275251 11.770831 34.034668  
Au 13.722535 14.196236 38.934204  
Au 14.156669 17.806812 36.178417  
Au 12.571430 15.466536 36.709873  
Au 12.838974 12.781802 36.625565  
Au 14.697733 10.812851 36.104591  
Au 17.599699 14.632303 36.234222

06H60C13Hg

H 13.123028 16.758301 20.622030  
H 11.417522 14.922070 20.554544  
H 15.890665 16.138103 20.594076  
H 16.638428 13.747746 20.496243  
H 14.713626 11.690912 20.406086  
H 12.269814 12.237745 20.434158  
C 16.208908 14.180726 21.400759  
C 15.805621 15.471651 21.453419



C 12.930491 16.117737 21.483751  
C 12.009463 15.126712 21.447653  
C 12.889929 12.329620 21.326889  
C 14.210922 12.034102 21.311470  
C 15.118342 15.894016 22.685280  
C 13.757223 16.202528 22.699621  
C 11.946046 14.245875 22.626560  
C 12.361020 12.915675 22.568880  
C 14.967110 12.332124 22.538061  
C 15.917936 13.351977 22.581106  
C 13.053715 15.968514 23.949903  
C 12.073490 14.912773 23.910318  
C 12.878078 12.343030 23.799456  
C 14.283246 12.024357 23.781853  
C 16.111860 14.002162 23.864803  
C 15.682062 15.376948 23.920321  
C 11.897537 14.156015 25.104366  
C 12.330595 12.766589 25.043934  
C 14.986731 12.166237 25.011950  
C 15.975455 13.235160 25.057421  
C 15.163788 15.834661 25.165106  
C 13.743774 16.156574 25.182257  
C 12.890568 12.240856 26.253159  
C 14.281110 11.925025 26.235306  
C 16.106140 13.902910 26.317648  
C 15.682228 15.264380 26.372952  
C 13.057713 15.857373 26.404043

C 12.092639 14.808974 26.363821  
C 14.980906 12.091872 27.493919  
C 15.941055 13.138254 27.538263  
C 15.142675 15.701030 27.644997  
C 13.759069 16.019867 27.663292  
C 11.945457 14.044501 27.588047  
C 12.361609 12.685826 27.529022  
C 16.126490 13.793398 28.803764  
C 15.703220 15.175798 28.860743  
C 13.055443 15.781975 28.894447  
C 12.075373 14.712652 28.853424  
C 12.883325 12.114941 28.738836  
C 14.295622 11.787341 28.720482  
C 15.168619 15.615464 30.105293  
C 13.757201 15.939416 30.123871  
C 11.930211 13.946803 30.047890  
C 12.354136 12.563515 29.986502  
C 14.992290 11.960503 29.951855  
C 15.962696 13.032443 29.999439  
C 13.066154 15.645982 31.374187  
C 12.112831 14.606890 31.335398  
C 12.897701 12.010266 31.215233  
C 14.273453 11.691680 31.198536  
C 16.137997 13.716444 31.281403  
C 15.713929 15.057957 31.334654  
C 11.862537 13.739369 32.466591  
C 12.235292 12.485094 32.405643

C 15.108717 11.901444 32.338951  
C 16.029816 12.796601 32.397896  
C 15.151201 15.651489 32.531376  
C 13.868986 15.925759 32.544785  
Hg 14.174810 13.479405 36.473412  
Hg 16.090870 13.488684 39.340099  
Hg 17.205053 12.919514 34.522003  
Hg 11.058324 14.406949 34.531788  
Hg 16.321907 15.920096 34.475368  
Hg 13.107007 16.825026 34.525173  
Hg 12.062822 11.234240 34.321926  
Hg 12.906500 14.879293 39.845230  
Hg 13.478649 17.155014 37.448437  
Hg 10.803041 13.918032 37.473114  
Hg 11.843011 11.087855 37.281918  
Hg 15.229017 10.503098 34.410297  
Hg 16.358150 16.208050 37.413292

05H60C13Sc

H 12.919998 12.690465 20.084293  
H 15.211163 11.908519 20.234798  
H 16.465645 13.961042 20.281925  
H 14.987858 15.881926 20.175446  
H 12.725385 15.106549 20.053349  
C 16.360325 13.975097 21.368528  
C 15.920450 15.166866 22.023403  
C 14.913729 15.842013 21.263973

C 13.630095 15.892774 21.898529  
C 12.716193 15.075787 21.144346  
C 12.348557 13.869261 21.829229  
C 12.872666 12.715441 21.174824  
C 13.818969 11.972463 21.938009  
C 15.119295 11.986525 21.319361  
C 16.070372 12.767591 22.072060  
C 15.825411 15.176189 23.452188  
C 14.781340 15.932769 24.106100  
C 13.559165 15.881101 23.314985  
C 12.510603 15.117330 23.987759  
C 12.286100 13.884834 23.259367  
C 12.648062 12.705655 24.015543  
C 13.740333 12.010841 23.363989  
C 14.953948 11.996437 24.164970  
C 15.963620 12.804655 23.489344  
C 16.261757 14.028993 24.214520  
C 14.696124 15.933435 25.510820  
C 13.392056 15.919448 26.162674  
C 12.448619 15.115107 25.390644  
C 12.066414 13.902083 26.106400  
C 12.566925 12.721032 25.423752  
C 13.550965 11.995658 26.210266  
C 14.859899 12.037163 25.562954  
C 15.812695 12.832725 26.335419  
C 16.168301 14.047572 25.619633  
C 15.709507 15.248720 26.302139

C 13.316767 15.919052 27.564205  
C 12.281424 15.141821 28.239534  
C 11.991941 13.914334 27.509216  
C 12.378478 12.730513 28.265076  
C 13.469532 12.018156 27.610630  
C 14.690662 12.068670 28.407578  
C 15.716562 12.857360 27.734694  
C 16.021578 14.083459 28.460005  
C 15.626719 15.264123 27.702662  
C 14.538964 15.981796 28.357660  
C 12.205853 15.149857 29.640112  
C 11.816565 13.936311 30.351049  
C 12.299940 12.743740 29.667593  
C 13.299778 12.030123 30.454100  
C 14.606873 12.089351 29.806555  
C 15.555626 12.885961 30.571667  
C 15.938917 14.097718 29.860521  
C 15.478003 15.302496 30.544302  
C 14.457932 15.990372 29.758968  
C 13.152843 15.951113 30.407114  
C 11.715829 13.950013 31.765127  
C 12.069435 12.717977 32.525509  
C 13.214375 12.028764 31.866877  
C 14.471317 12.043324 32.669605  
C 15.490182 12.888199 31.988947  
C 15.858897 14.126795 32.726692  
C 15.411301 15.324837 31.958246

C 14.318527 16.095711 32.620190  
C 13.065830 15.982314 31.821238  
C 11.970378 15.225539 32.496006  
Sc 14.413112 16.918083 34.587502  
Sc 11.166765 15.737726 34.402782  
Sc 13.696633 14.049868 33.319241  
Sc 12.527853 16.624577 37.222519  
Sc 16.545822 14.191547 34.749542  
Sc 15.527727 15.760870 37.403778  
Sc 13.498690 14.108617 36.091961  
Sc 11.272053 12.279076 34.457062  
Sc 10.776531 14.036617 37.151970  
Sc 14.599430 11.307712 34.672359  
Sc 13.334257 14.141807 39.001175  
Sc 15.634727 12.633526 37.443256  
Sc 12.692828 11.566116 37.289635

05H60C13Ti

H 13.112944 12.224522 20.239046  
H 15.514372 12.022455 20.382551  
H 16.444803 14.255717 20.371859  
H 14.623643 15.834375 20.222712  
H 12.556711 14.579494 20.141926  
C 16.323458 14.271661 21.456318  
C 15.680869 15.383349 22.093311  
C 14.555296 15.801233 21.311588  
C 13.290639 15.583693 21.949839

C 12.554024 14.585676 21.233498  
C 12.362389 13.365437 21.959034  
C 13.091126 12.305451 21.327396  
C 14.178316 11.795887 22.109362  
C 15.419540 12.109852 21.466234  
C 16.229837 13.044620 22.189251  
C 15.582426 15.404595 23.513876  
C 14.397183 15.949614 24.155851  
C 13.222608 15.601563 23.371351  
C 12.332455 14.687908 24.070431  
C 12.308124 13.409228 23.380737  
C 12.883917 12.332882 24.170246  
C 14.099883 11.860836 23.529560  
C 15.292835 12.135464 24.315580  
C 16.125866 13.094581 23.608990  
C 16.223747 14.367988 24.304941  
C 14.313553 15.972313 25.556395  
C 13.038081 15.709225 26.214128  
C 12.264409 14.721404 25.471060  
C 12.107313 13.481058 26.221718  
C 12.814157 12.385348 25.570377  
C 13.933807 11.908087 26.374054  
C 15.204245 12.189643 25.715395  
C 15.994369 13.164265 26.460867  
C 16.128336 14.404884 25.705734  
C 15.440236 15.511385 26.360653  
C 12.959524 15.741381 27.613420

C 12.100964 14.799068 28.316639  
C 12.032246 13.522608 27.620705  
C 12.654248 12.473783 28.415459  
C 13.853832 11.958628 27.772657  
C 15.033490 12.279913 28.563589  
C 15.906341 13.208827 27.860222  
C 15.958394 14.487579 28.555206  
C 15.351235 15.545732 27.760786  
C 14.144375 16.047346 28.403265  
C 11.993340 14.843777 29.717827  
C 11.825449 13.586965 30.458603  
C 12.552300 12.490189 29.818882  
C 13.679529 11.994499 30.614155  
C 14.961825 12.296052 29.968628  
C 15.765192 13.272881 30.703180  
C 15.899594 14.531487 29.959946  
C 15.201075 15.644928 30.602001  
C 14.063265 16.110674 29.804918  
C 12.775028 15.837770 30.450190  
C 11.692194 13.613532 31.862392  
C 12.305480 12.478766 32.672798  
C 13.591991 11.983261 32.020676  
C 14.853971 12.273496 32.831177  
C 15.729197 13.290895 32.113941  
C 15.836867 14.636881 32.824245  
C 15.151269 15.723606 32.012737  
C 13.902100 16.299795 32.660870

C 12.664385 15.922491 31.856392  
C 11.719117 14.968716 32.566765  
Ti 15.195850 16.011461 34.302277  
Ti 12.391045 16.241085 34.119461  
Ti 13.724303 14.137399 32.726341  
Ti 13.657982 16.523659 36.635345  
Ti 15.853709 13.266977 34.406734  
Ti 15.710080 14.753558 36.813225  
Ti 13.556820 14.220092 35.504574  
Ti 11.288825 13.630771 34.113937  
Ti 11.355471 15.100500 36.541283  
Ti 13.439641 11.777168 34.293598  
Ti 13.380851 14.258182 38.129288  
Ti 14.656081 12.269741 36.825779  
Ti 11.986006 12.488191 36.660007

05H60C13V

H 12.882320 12.631098 20.120419  
H 15.213206 11.999184 20.268654  
H 16.523521 14.025310 20.325228  
H 15.005728 15.895205 20.206640  
H 12.746616 15.040651 20.081873  
C 16.396830 14.036109 21.409353  
C 15.951222 15.225533 22.069376  
C 14.924552 15.854637 21.294325  
C 13.635809 15.848312 21.919777  
C 12.734995 15.020098 21.173080

C 12.328176 13.834786 21.867121  
C 12.863585 12.681248 21.210640  
C 13.839457 11.969543 21.979351  
C 15.124479 12.069469 21.354256  
C 16.078957 12.827433 22.107468  
C 15.841623 15.225543 23.492018  
C 14.766800 15.952495 24.140709  
C 13.558458 15.842193 23.344082  
C 12.511806 15.090328 24.014675  
C 12.272383 13.855032 23.292051  
C 12.644068 12.675901 24.053286  
C 13.759808 12.011681 23.402369  
C 14.971740 12.045299 24.201262  
C 15.970136 12.858891 23.527716  
C 16.285412 14.075357 24.256180  
C 14.672920 15.951984 25.544323  
C 13.365516 15.920918 26.186634  
C 12.441607 15.096895 25.418554  
C 12.061953 13.886858 26.135244  
C 12.572915 12.703468 25.457300  
C 13.577452 12.006497 26.251102  
C 14.880374 12.078325 25.603336  
C 15.833929 12.866467 26.373478  
C 16.179462 14.089356 25.657570  
C 15.689476 15.279249 26.339346  
C 13.283367 15.925289 27.586388  
C 12.256935 15.138228 28.258240

C 11.989742 13.904059 27.538116  
C 12.391013 12.729172 28.300259  
C 13.499260 12.035566 27.653072  
C 14.718669 12.098216 28.447636  
C 15.742135 12.886000 27.772629  
C 16.023190 14.116344 28.502632  
C 15.593724 15.284110 27.742537  
C 14.498944 15.993018 28.386168  
C 12.172010 15.154858 29.660877  
C 11.805321 13.941421 30.375755  
C 12.308393 12.748327 29.699991  
C 13.324275 12.052318 30.484856  
C 14.633174 12.119260 29.852394  
C 15.586062 12.907265 30.631659  
C 15.935484 14.129360 29.903114  
C 15.421687 15.314790 30.568377  
C 14.409273 16.005880 29.787239  
C 13.096381 15.979006 30.430269  
C 11.718599 13.967960 31.788937  
C 12.121496 12.769135 32.556675  
C 13.238889 12.075665 31.889965  
C 14.453721 12.144584 32.728928  
C 15.502386 12.927861 32.046246  
C 15.786105 14.181983 32.790939  
C 15.336714 15.335814 31.978296  
C 14.252044 16.082712 32.646599  
C 13.010982 16.001158 31.841124

C 11.975066 15.212608 32.559147  
V 14.255952 16.192795 34.652588  
V 11.929589 15.227743 34.624401  
V 13.688082 14.086259 33.155659  
V 13.045270 16.005861 36.971275  
V 15.825068 14.512987 34.811684  
V 14.953387 15.582018 37.142292  
V 13.746773 13.925452 35.719044  
V 11.773270 12.756078 34.531895  
V 11.543523 13.871431 36.940231  
V 13.943021 11.852459 34.698982  
V 13.529749 13.708951 38.276588  
V 15.018801 12.745749 37.181332  
V 12.555180 11.898895 36.806175

05H60C13Cr

H 12.861731 12.671048 20.148684  
H 15.177612 11.970293 20.288483  
H 16.506927 13.982580 20.346067  
H 15.032378 15.904292 20.240818  
H 12.765880 15.083405 20.122583  
C 16.383081 13.992661 21.430433  
C 15.964721 15.189035 22.095448  
C 14.953402 15.853636 21.328064  
C 13.666711 15.872926 21.960398  
C 12.757026 15.058299 21.213799  
C 12.335194 13.875997 21.902416

C 12.844515 12.714149 21.239269  
C 13.801500 11.971808 22.001013  
C 15.089288 12.044744 21.373724  
C 16.055817 12.786943 22.128254  
C 15.862377 15.187283 23.518150  
C 14.808201 15.936604 24.176493  
C 13.593390 15.859398 23.382404  
C 12.536794 15.119211 24.055771  
C 12.282131 13.889178 23.328756  
C 12.628878 12.698645 24.078259  
C 13.726925 12.008413 23.422974  
C 14.942716 12.015944 24.221172  
C 15.948771 12.818411 23.548538  
C 16.289080 14.026502 24.279743  
C 14.724816 15.936150 25.581268  
C 13.419645 15.925173 26.231024  
C 12.478479 15.119380 25.459305  
C 12.092342 13.909535 26.168777  
C 12.559649 12.717854 25.482819  
C 13.542052 11.977861 26.270014  
C 14.850858 12.048103 25.622677  
C 15.800742 12.832952 26.395247  
C 16.187378 14.040977 25.681696  
C 15.735645 15.244994 26.370018  
C 13.343208 15.927836 27.630798  
C 12.303927 15.149046 28.303467  
C 12.024171 13.920105 27.576094

C 12.381107 12.728518 28.323921  
C 13.459750 11.992144 27.664707  
C 14.681954 12.056993 28.463299  
C 15.700938 12.852700 27.800510  
C 16.027636 14.066729 28.533602  
C 15.645905 15.252870 27.771334  
C 14.563443 15.973738 28.424900  
C 12.229790 15.157145 29.702690  
C 11.893350 13.937744 30.415190  
C 12.305081 12.735678 29.728970  
C 13.274207 11.956103 30.510565  
C 14.590654 12.064342 29.866867  
C 15.503226 12.879817 30.634239  
C 15.931940 14.077364 29.934370  
C 15.479254 15.284940 30.622158  
C 14.477674 15.985266 29.833452  
C 13.169403 15.972560 30.473898  
C 11.812732 13.945611 31.845413  
C 12.146690 12.735609 32.608421  
C 13.191668 11.961879 31.902514  
C 14.389870 12.100881 32.751354  
C 15.399084 12.893478 32.057030  
C 15.709964 14.093801 32.826748  
C 15.382442 15.293733 32.035233  
C 14.295183 16.003828 32.717251  
C 13.086482 15.990808 31.881216  
C 12.056952 15.201145 32.594440

Cr 13.971617 16.486000 34.701244  
Cr 11.365130 15.220605 34.468269  
Cr 13.659716 14.041889 33.296165  
Cr 12.351268 15.991470 36.493835  
Cr 15.872719 14.355446 34.841980  
Cr 15.125100 15.815707 36.654694  
Cr 13.421852 14.094273 35.519794  
Cr 11.656332 12.534195 34.550568  
Cr 11.241528 13.884719 36.955547  
Cr 14.436704 11.841221 34.788662  
Cr 13.862841 14.233849 38.012871  
Cr 15.544619 12.998996 36.603741  
Cr 12.826239 12.024837 36.583416

05H60C13Mn

H 12.860453 12.652265 20.131510  
H 15.178807 11.990052 20.276178  
H 16.504335 13.999980 20.333466  
H 15.016195 15.895845 20.222839  
H 12.755158 15.061053 20.100410  
C 16.382332 14.010964 21.418060  
C 15.955171 15.204419 22.082193  
C 14.936687 15.851463 21.310421  
C 13.648824 15.856644 21.939024  
C 12.742204 15.038527 21.191616  
C 12.322197 13.857300 21.882082  
C 12.841892 12.698375 21.221867

C 13.807579 11.972512 21.988588  
C 15.092484 12.058875 21.362087  
C 16.053703 12.805850 22.115568  
C 15.849331 15.205073 23.504461  
C 14.784343 15.943419 24.158279  
C 13.572753 15.846341 23.362768  
C 12.520338 15.104514 24.035912  
C 12.265465 13.873796 23.307632  
C 12.622282 12.687639 24.063261  
C 13.730331 12.011718 23.411453  
C 14.943973 12.031054 24.210262  
C 15.946162 12.837657 23.536926  
C 16.279305 14.047386 24.267197  
C 14.697566 15.943726 25.561653  
C 13.392370 15.915309 26.209663  
C 12.455007 15.107156 25.439274  
C 12.058651 13.898631 26.151085  
C 12.551050 12.710392 25.466713  
C 13.548084 11.997074 26.257256  
C 14.854193 12.063972 25.611212  
C 15.808918 12.848429 26.382549  
C 16.177664 14.063297 25.668032  
C 15.715330 15.264491 26.353762  
C 13.314467 15.917079 27.610392  
C 12.278317 15.139487 28.280571  
C 11.989971 13.910736 27.553635  
C 12.370403 12.723338 28.308086



C 13.467209 12.016685 27.655518  
C 14.688849 12.076134 28.452145  
C 15.712057 12.869775 27.782978  
C 16.021420 14.091784 28.512829  
C 15.624847 15.272436 27.753780  
C 14.533217 15.985417 28.408340  
C 12.198007 15.149681 29.681404  
C 11.816906 13.933604 30.386873  
C 12.290379 12.736549 29.709751  
C 13.291798 12.017621 30.498318  
C 14.603456 12.090617 29.852909  
C 15.545377 12.892051 30.619576  
C 15.933361 14.104704 29.914404  
C 15.467415 15.308374 30.598516  
C 14.449364 15.996276 29.812071  
C 13.141198 15.956503 30.453224  
C 11.741883 13.944916 31.799574  
C 12.143804 12.780028 32.591640  
C 13.210772 12.037002 31.902372  
C 14.424376 12.136959 32.730610  
C 15.455642 12.906260 32.031578  
C 15.734542 14.124143 32.791771  
C 15.375315 15.311593 32.006527  
C 14.266811 15.982511 32.699669  
C 13.061036 15.955547 31.861849  
C 12.046766 15.156797 32.560528  
Mn 14.252178 16.334862 34.705879

Mn 11.633162 15.474712 34.494862  
Mn 13.682107 14.038525 33.332977  
Mn 12.702352 16.025509 36.804245  
Mn 16.004597 14.203532 34.787071  
Mn 15.195216 15.419399 37.016182  
Mn 13.530961 14.044680 35.560192  
Mn 11.723116 12.635159 34.569721  
Mn 11.358209 13.966391 36.659855  
Mn 14.437114 11.820193 34.718887  
Mn 13.408429 14.186532 38.129700  
Mn 15.134119 12.956469 36.840981  
Mn 12.868336 12.014233 37.022739

05H60C13Fe

H 12.859859 12.651094 20.133404  
H 15.181806 11.999684 20.276579  
H 16.512486 14.004706 20.336693  
H 15.013088 15.885649 20.225679  
H 12.749936 15.055401 20.102381  
C 16.389713 14.013799 21.421099  
C 15.955294 15.204630 22.085390  
C 14.933846 15.844347 21.313414  
C 13.646519 15.850131 21.940487  
C 12.737171 15.033774 21.193527  
C 12.317861 13.852569 21.884981  
C 12.842424 12.696527 21.223751  
C 13.812440 11.975636 21.989199

C 15.096562 12.065025 21.362673  
C 16.059820 12.807800 22.117279  
C 15.848719 15.204192 23.507689  
C 14.782348 15.939905 24.160702  
C 13.571206 15.841547 23.364920  
C 12.518506 15.101368 24.037687  
C 12.262721 13.870060 23.309555  
C 12.623977 12.684807 24.065451  
C 13.734518 12.013975 23.412924  
C 14.947358 12.032007 24.210987  
C 15.951792 12.837466 23.538342  
C 16.281761 14.047779 24.269854  
C 14.695363 15.940121 25.564135  
C 13.390390 15.912443 26.210953  
C 12.452962 15.104378 25.440842  
C 12.054809 13.895755 26.152813  
C 12.551920 12.707611 25.468378  
C 13.551261 11.999559 26.258018  
C 14.856533 12.063340 25.612049  
C 15.813812 12.844878 26.384327  
C 16.179386 14.062527 25.670254  
C 15.712914 15.261310 26.356243  
C 13.312863 15.913202 27.611111  
C 12.276931 15.137807 28.280733  
C 11.985979 13.908512 27.553698  
C 12.371999 12.722560 28.309334  
C 13.471034 12.021482 27.657793

C 14.690725 12.075992 28.453573  
C 15.718380 12.864241 27.783352  
C 16.022221 14.088282 28.514557  
C 15.620145 15.266441 27.756443  
C 14.530657 15.982054 28.409550  
C 12.192847 15.151241 29.681700  
C 11.802419 13.934415 30.384607  
C 12.290411 12.737177 29.710533  
C 13.299035 12.038763 30.501963  
C 14.606163 12.090257 29.855976  
C 15.562583 12.878990 30.624359  
C 15.936565 14.100073 29.916454  
C 15.459631 15.299028 30.597498  
C 14.446067 15.993729 29.811895  
C 13.137184 15.954339 30.454451  
C 11.718983 13.948447 31.789820  
C 12.129240 12.784194 32.591942  
C 13.215740 12.057677 31.912411  
C 14.428813 12.142321 32.745518  
C 15.476631 12.893932 32.030994  
C 15.751099 14.123428 32.791080  
C 15.372180 15.309068 32.006222  
C 14.267488 15.995776 32.702488  
C 13.053121 15.962147 31.863708  
C 12.028281 15.164553 32.558655  
Fe 14.186891 16.094931 34.686722  
Fe 11.825073 15.199991 34.506145

Fe 13.690776 14.049023 33.155823  
Fe 12.732533 16.072704 36.761215  
Fe 15.702576 14.133315 34.740044  
Fe 15.111229 15.389117 36.942123  
Fe 13.536199 14.086177 35.711990  
Fe 11.924448 12.778195 34.545780  
Fe 11.404095 14.023451 36.742531  
Fe 14.352769 12.093600 34.724899  
Fe 13.387208 14.161719 38.194210  
Fe 15.185019 12.970166 36.989502  
Fe 12.894693 12.101679 36.833939

05H60C13Co

H 12.840681 12.652284 20.150078  
H 15.154633 11.986428 20.291693  
H 16.498774 13.986839 20.343351  
H 15.019171 15.886273 20.235926  
H 12.755182 15.058297 20.119186  
C 16.379042 13.998215 21.428028  
C 15.958721 15.194193 22.093979  
C 14.940960 15.842257 21.323627  
C 13.655431 15.851097 21.954193  
C 12.743220 15.037400 21.210470  
C 12.313539 13.861133 21.902325  
C 12.824387 12.698719 21.240480  
C 13.788378 11.969002 22.006826  
C 15.071357 12.054510 21.377951

C 16.037838 12.796398 22.127264  
C 15.856821 15.195685 23.516306  
C 14.794156 15.937311 24.173958  
C 13.582478 15.841393 23.379700  
C 12.526341 15.107347 24.053181  
C 12.258377 13.878089 23.326601  
C 12.608915 12.689019 24.083244  
C 13.714474 12.010287 23.429718  
C 14.929874 12.026802 24.225908  
C 15.933230 12.828770 23.549942  
C 16.278341 14.034112 24.280115  
C 14.710875 15.937689 25.576885  
C 13.407278 15.907510 26.226480  
C 12.462091 15.110580 25.456598  
C 12.049317 13.905231 26.167646  
C 12.538174 12.712152 25.484390  
C 13.535974 11.998738 26.275751  
C 14.840624 12.061798 25.627916  
C 15.800370 12.840808 26.398540  
C 16.181395 14.050896 25.681734  
C 15.731489 15.257565 26.368576  
C 13.332139 15.907668 27.627802  
C 12.288201 15.142118 28.295553  
C 11.980119 13.917841 27.566486  
C 12.358190 12.729682 28.325691  
C 13.455859 12.023945 27.674019  
C 14.676506 12.081503 28.470560

C 15.705804 12.864070 27.799904  
C 16.029285 14.083158 28.529112  
C 15.643235 15.267664 27.765821  
C 14.550983 15.981874 28.422258  
C 12.203935 15.154192 29.696245  
C 11.791878 13.943261 30.404171  
C 12.274778 12.742402 29.726141  
C 13.282004 12.037789 30.516287  
C 14.592484 12.097765 29.871643  
C 15.541016 12.893394 30.639206  
C 15.945644 14.099624 29.930964  
C 15.492817 15.311875 30.614290  
C 14.467782 15.994925 29.823521  
C 13.162129 15.938073 30.465048  
C 11.710089 13.958721 31.810173  
C 12.139202 12.805143 32.615520  
C 13.198678 12.055975 31.922691  
C 14.407190 12.159737 32.759850  
C 15.452545 12.911164 32.051907  
C 15.733339 14.131133 32.819622  
C 15.407349 15.324813 32.018742  
C 14.285763 15.983755 32.713131  
C 13.078812 15.947419 31.877033  
C 12.055906 15.163928 32.583488  
Co 14.188471 16.087864 34.657257  
Co 11.876641 15.235034 34.513687  
Co 13.693448 14.053323 33.175858

Co 12.788875 16.058474 36.636696  
Co 15.694287 14.157953 34.770947  
Co 15.106285 15.377385 36.808563  
Co 13.540930 14.088129 35.666111  
Co 11.953301 12.782125 34.560135  
Co 11.406835 13.994026 36.594574  
Co 14.311570 12.115418 34.698696  
Co 13.396679 14.114754 37.962593  
Co 15.207004 12.960168 36.821537  
Co 12.870103 12.115901 36.707905

05H60C13Ni

H 12.863046 12.652271 20.157873  
H 15.173631 12.004381 20.296970  
H 16.494400 14.009228 20.353050  
H 15.010450 15.891068 20.247236  
H 12.761151 15.054420 20.124292  
C 16.380264 14.017969 21.438408  
C 15.951283 15.208282 22.106012  
C 14.931851 15.851056 21.335127  
C 13.646060 15.856025 21.963358  
C 12.742681 15.035946 21.215406  
C 12.323621 13.856306 21.907791  
C 12.843432 12.697182 21.248196  
C 13.811049 11.974593 22.013962  
C 15.092312 12.065516 21.383615  
C 16.052996 12.812887 22.136032

C 15.847964 15.207363 23.529140  
C 14.782603 15.943935 24.185633  
C 13.571768 15.847043 23.387682  
C 12.520053 15.105611 24.061092  
C 12.266098 13.874169 23.332600  
C 12.626354 12.688652 24.088840  
C 13.735103 12.014324 23.437084  
C 14.949512 12.033915 24.234575  
C 15.949922 12.842146 23.558628  
C 16.281315 14.051202 24.291973  
C 14.697237 15.945045 25.587170  
C 13.390822 15.916025 26.235462  
C 12.451727 15.110380 25.462044  
C 12.054291 13.899104 26.173115  
C 12.553723 12.710655 25.489109  
C 13.554206 12.001403 26.281456  
C 14.861093 12.064227 25.634211  
C 15.817705 12.848531 26.408461  
C 16.183949 14.065620 25.692581  
C 15.717153 15.265482 26.379910  
C 13.312239 15.919001 27.632309  
C 12.273476 15.140833 28.300783  
C 11.981509 13.911323 27.569853  
C 12.374800 12.728667 28.329023  
C 13.472841 12.021773 27.677668  
C 14.695217 12.076524 28.474686  
C 15.726030 12.865876 27.805574

C 16.024498 14.091562 28.538694  
C 15.627732 15.272972 27.776991  
C 14.532364 15.984680 28.431284  
C 12.186462 15.154972 29.698704  
C 11.803809 13.937036 30.408329  
C 12.288223 12.739708 29.727856  
C 13.298438 12.039498 30.515987  
C 14.610029 12.085794 29.872414  
C 15.555473 12.885893 30.646362  
C 15.939869 14.103249 29.938251  
C 15.457705 15.301641 30.620174  
C 14.446468 16.000879 29.830547  
C 13.135662 15.953442 30.471720  
C 11.713408 13.949707 31.815308  
C 12.145054 12.791038 32.608459  
C 13.211216 12.047703 31.923040  
C 14.415356 12.155535 32.757946  
C 15.472121 12.894814 32.055653  
C 15.723808 14.124948 32.816936  
C 15.375668 15.315197 32.027027  
C 14.257658 15.978508 32.711418  
C 13.049064 15.967547 31.878319  
C 12.049177 15.156051 32.584801  
Ni 14.178039 16.105076 34.618889  
Ni 11.834623 15.241382 34.488926  
Ni 13.683257 14.044377 33.238266  
Ni 12.770313 16.020725 36.612114

Ni 15.768578 14.138813 34.726471  
Ni 15.109790 15.392863 36.742966  
Ni 13.541948 14.049607 35.598438  
Ni 11.909241 12.692791 34.497650  
Ni 11.375251 14.005606 36.527870  
Ni 14.328484 12.050509 34.666519  
Ni 13.394452 14.120762 37.958679  
Ni 15.174784 12.975821 36.807217  
Ni 12.885042 12.143332 36.691788

05H60C13Cu

H 12.943410 12.685807 20.137909  
H 15.228925 11.856227 20.293055  
H 16.412394 13.973984 20.325232  
H 14.970838 15.912248 20.227144  
H 12.751169 15.096490 20.111311  
C 16.335665 13.987900 21.414167  
C 15.900238 15.180293 22.070885  
C 14.900908 15.870539 21.315784  
C 13.616257 15.918195 21.955929  
C 12.734540 15.069734 21.202421  
C 12.371986 13.864995 21.883215  
C 12.888262 12.704410 21.228149  
C 13.826688 11.956815 21.990217  
C 15.135463 11.944288 21.376551  
C 16.054070 12.783540 22.114532  
C 15.811654 15.197337 23.500093

C 14.773708 15.958482 24.158569  
C 13.546228 15.907818 23.369328  
C 12.517931 15.114679 24.039024  
C 12.300642 13.883327 23.312859  
C 12.659345 12.702547 24.065434  
C 13.746090 12.000877 23.413969  
C 14.962580 11.996320 24.217365  
C 15.949020 12.825319 23.535904  
C 16.242811 14.047189 24.259451  
C 14.691156 15.955422 25.560909  
C 13.383681 15.928074 26.210802  
C 12.450892 15.112214 25.440296  
C 12.072523 13.896281 26.152271  
C 12.575003 12.713459 25.471346  
C 13.561558 11.994114 26.261686  
C 14.871692 12.037151 25.612926  
C 15.817396 12.845318 26.381866  
C 16.162764 14.063114 25.665327  
C 15.701714 15.261217 26.350597  
C 13.306478 15.927519 27.607441  
C 12.275515 15.139931 28.277510  
C 11.987411 13.908932 27.550999  
C 12.383109 12.727452 28.309376  
C 13.479403 12.016045 27.659685  
C 14.701860 12.077850 28.455463  
C 15.729947 12.865854 27.780590  
C 16.021338 14.096172 28.508718

C 15.622835 15.276660 27.750034  
C 14.528970 15.989199 28.403433  
C 12.186369 15.156668 29.674286  
C 11.818584 13.937361 30.387011  
C 12.293337 12.737146 29.707605  
C 13.311951 12.056609 30.501293  
C 14.620034 12.090875 29.854195  
C 15.557269 12.901100 30.625338  
C 15.947293 14.110934 29.909271  
C 15.451590 15.302167 30.590797  
C 14.447157 16.007097 29.801369  
C 13.140308 15.946354 30.447248  
C 11.726645 13.954449 31.793348  
C 12.145585 12.794835 32.586136  
C 13.225542 12.068804 31.909084  
C 14.436733 12.156463 32.736389  
C 15.479053 12.916200 32.034477  
C 15.741492 14.146328 32.787880  
C 15.370856 15.323155 31.998705  
C 14.265140 16.005760 32.677372  
C 13.053411 15.966413 31.854456  
C 12.038342 15.171471 32.553909  
Cu 14.188933 16.210638 34.633587  
Cu 11.721586 15.238750 34.494785  
Cu 13.677003 14.059712 33.407757  
Cu 12.760543 16.090080 36.731083  
Cu 15.814578 14.111520 34.756397

Cu 15.115204 15.432783 36.876804  
Cu 13.513053 14.060420 35.820187  
Cu 11.884082 12.667084 34.534321  
Cu 11.318440 14.048492 36.689316  
Cu 14.326576 11.984404 34.694466  
Cu 13.365394 14.091744 38.245300  
Cu 15.267045 12.963430 36.941906  
Cu 12.884809 12.019420 36.814156

05H60C13Zn

H 12.957990 12.761324 20.088718  
H 15.225504 11.960714 20.265854  
H 16.552027 13.892920 20.351227  
H 15.028537 15.750461 20.218935  
H 12.646807 15.195418 20.080437  
C 16.428038 13.906971 21.435934  
C 15.955886 15.089577 22.080929  
C 14.955127 15.762918 21.308144  
C 13.679878 15.838549 21.920527  
C 12.640819 15.151422 21.170918  
C 12.334377 13.894655 21.834389  
C 12.875854 12.762138 21.177422  
C 13.823325 12.010498 21.945679  
C 15.122995 12.012068 21.351618  
C 16.122389 12.688916 22.135012  
C 15.861173 15.094296 23.509087  
C 14.807531 15.846049 24.151409

C 13.602937 15.820730 23.345772  
C 12.509138 15.117970 24.005871  
C 12.266649 13.887671 23.260790  
C 12.633451 12.705091 24.014807  
C 13.728254 12.011000 23.372833  
C 14.923342 11.959969 24.187271  
C 16.003559 12.707403 23.541428  
C 16.285419 13.942467 24.271444  
C 14.709618 15.863455 25.555531  
C 13.401206 15.872586 26.187817  
C 12.434372 15.108370 25.402710  
C 12.029688 13.890688 26.105507  
C 12.523489 12.706394 25.419664  
C 13.492918 11.969189 26.214581  
C 14.809204 11.981875 25.585165  
C 15.776163 12.740047 26.379072  
C 16.165262 13.956547 25.671556  
C 15.698930 15.156036 26.355253  
C 13.309175 15.882586 27.586246  
C 12.266701 15.108716 28.244841  
C 11.942192 13.895672 27.503687  
C 12.312145 12.702018 28.258516  
C 13.392304 11.967498 27.612309  
C 14.604403 11.992067 28.426687  
C 15.665525 12.756261 27.773146  
C 15.954069 13.979580 28.512932  
C 15.606024 15.172289 27.754078

C 14.528840 15.925341 28.396431  
C 12.174430 15.116315 29.647446  
C 11.792511 13.905445 30.355864  
C 12.205172 12.696307 29.656902  
C 13.189876 11.980331 30.448803  
C 14.499689 11.989419 29.823950  
C 15.418174 12.791741 30.621161  
C 15.844874 13.989462 29.915354  
C 15.374551 15.182928 30.596022  
C 14.435082 15.959343 29.787516  
C 13.121752 15.892666 30.425636  
C 11.705746 13.913056 31.769619  
C 12.054974 12.732584 32.525097  
C 13.081761 11.970428 31.868462  
C 14.256067 12.072762 32.698406  
C 15.310006 12.806171 32.036213  
C 15.598763 14.027048 32.766827  
C 15.271756 15.198752 32.007103  
C 14.237751 16.024757 32.677792  
C 13.022398 15.928445 31.837797  
C 12.033108 15.123742 32.513386  
Zn 15.025002 17.319841 34.127747  
Zn 11.052128 15.523638 34.312740  
Zn 13.490419 14.898089 34.309772  
Zn 12.321290 16.457840 36.493107  
Zn 15.976352 14.217376 34.732536  
Zn 14.904823 15.992892 36.368305



Zn 15.137917 13.366200 36.878227  
Zn 11.584684 12.763828 34.477127  
Zn 11.135108 14.200562 36.436481  
Zn 14.235194 12.198417 34.705975  
Zn 13.277801 14.679338 37.896347  
Zn 16.854315 12.313858 38.422825  
Zn 12.783293 12.368000 36.887280

05H60C13Y

H 12.469346 12.435113 20.395294  
H 14.790121 11.737345 20.345108  
H 16.051893 13.770360 20.183109  
H 14.504632 15.645018 20.138802  
H 12.243435 14.837148 20.265852  
C 16.035547 13.829800 21.273020  
C 15.624020 15.038911 21.920425  
C 14.533076 15.654288 21.229954  
C 13.313761 15.716560 21.978014  
C 12.345507 14.857819 21.352093  
C 12.043230 13.690563 22.134642  
C 12.540395 12.521425 21.481470  
C 13.580538 11.834763 22.179060  
C 14.803363 11.865441 21.428621  
C 15.833170 12.646868 22.055788  
C 15.662458 15.104929 23.348759  
C 14.665350 15.870813 24.067251  
C 13.375881 15.769809 23.394295

C 12.397290 15.047167 24.203438  
C 12.121904 13.772635 23.555246  
C 12.599514 12.638700 24.324926  
C 13.643347 11.941311 23.602789  
C 14.927836 11.969089 24.281618  
C 15.867744 12.739905 23.469685  
C 16.216221 14.003760 24.109962  
C 14.715374 15.934170 25.468790  
C 13.473735 15.959978 26.245552  
C 12.464162 15.115025 25.598217  
C 12.179817 13.925302 26.399353  
C 12.660087 12.726610 25.728954  
C 13.740735 12.080062 26.453278  
C 14.977256 12.066440 25.677406  
C 16.021368 12.877842 26.317993  
C 16.261307 14.078879 25.508850  
C 15.800753 15.281943 26.180771  
C 13.529328 16.023237 27.638620  
C 12.562899 15.268855 28.443623  
C 12.231726 14.006350 27.797428  
C 12.755895 12.893610 28.577465  
C 13.796640 12.177892 27.856651  
C 15.091694 12.242346 28.521631  
C 16.078583 12.961329 27.705210  
C 16.377777 14.242065 28.354134  
C 15.849900 15.350649 27.587700  
C 14.828568 16.085428 28.309277

C 12.594330 15.353144 29.846254  
C 12.287004 14.171576 30.662230  
C 12.792986 12.970128 29.989321  
C 13.926544 12.370781 30.679432  
C 15.161148 12.312882 29.917082  
C 16.252060 13.085926 30.549269  
C 16.430965 14.315334 29.764072  
C 15.914268 15.468720 30.450520  
C 14.881332 16.155319 29.708183  
C 13.628920 16.195692 30.456963  
C 12.188774 14.260007 32.101189  
C 12.770587 12.938169 32.824974  
C 13.998987 12.446100 32.088348  
C 15.322594 12.369346 32.755478  
C 16.327583 13.168497 31.933834  
C 16.555374 14.459829 32.650269  
C 15.971089 15.564924 31.910553  
C 15.000633 16.459402 32.580254  
C 13.687185 16.318069 31.841143  
C 12.564419 15.706284 32.626392  
Y 13.439964 17.473799 33.930561  
Y 10.518074 15.736771 33.539616  
Y 14.391750 14.476484 33.698471  
Y 11.631244 16.448063 36.814934  
Y 16.921068 12.814782 34.306927  
Y 14.812769 15.291151 37.037079  
Y 12.360888 13.520074 35.787888

Y 10.613911 12.420085 33.174446  
Y 9.472989 13.819402 36.462082  
Y 13.821173 11.067543 34.028408  
Y 12.181328 13.713195 38.858223  
Y 14.684320 11.975464 37.178665  
Y 11.306565 10.915509 36.756824

05H60C13Zr

H 13.060923 12.400272 20.181837  
H 15.451880 12.094072 20.325768  
H 16.484394 14.279996 20.357601  
H 14.732265 15.937603 20.232084  
H 12.615395 14.769840 20.123844  
C 16.358238 14.280511 21.441700  
C 15.765421 15.409834 22.096600  
C 14.659492 15.887803 21.319981  
C 13.384656 15.711112 21.950974  
C 12.607573 14.759563 21.215290  
C 12.358016 13.539333 21.922060  
C 13.039624 12.460361 21.271416  
C 14.102309 11.890523 22.045177  
C 15.357243 12.162665 21.411022  
C 16.205667 13.046503 22.152061  
C 15.661810 15.410464 23.516087  
C 14.497584 15.992939 24.164858  
C 13.311954 15.708259 23.372318  
C 12.379685 14.825506 24.055641

C 12.302002 13.561810 23.344469  
C 12.828661 12.447325 24.114899  
C 14.024347 11.935831 23.466602  
C 15.224910 12.141657 24.260189  
C 16.099686 13.077103 23.572012  
C 16.252579 14.331461 24.291128  
C 14.410868 15.998459 25.564507  
C 13.122715 15.779918 26.216137  
C 12.309960 14.837542 25.455490  
C 12.095812 13.591225 26.183252  
C 12.756315 12.475631 25.514793  
C 13.852375 11.937089 26.314266  
C 15.135611 12.172876 25.660057  
C 15.964529 13.100632 26.424650  
C 16.155231 14.348366 25.691153  
C 15.512534 15.473513 26.364071  
C 13.040037 15.794780 27.613262  
C 12.140474 14.873813 28.297100  
C 12.012837 13.611183 27.579243  
C 12.588249 12.521903 28.358583  
C 13.767354 11.962782 27.711632  
C 14.959407 12.221603 28.510202  
C 15.874763 13.123935 27.823187  
C 15.978605 14.388828 28.541376  
C 15.425869 15.490118 27.762630  
C 14.237455 16.029688 28.412716  
C 12.019576 14.906542 29.693703

C 11.795379 13.640549 30.410168  
C 12.477232 12.515842 29.756632  
C 13.583564 11.960349 30.546068  
C 14.888479 12.208943 29.911404  
C 15.730419 13.146345 30.665562  
C 15.927653 14.414331 29.944046  
C 15.271485 15.551800 30.602224  
C 14.153670 16.082741 29.811346  
C 12.844475 15.859239 30.445911  
C 11.578241 13.633515 31.802301  
C 12.152282 12.397097 32.586960  
C 13.479155 11.846857 31.946617  
C 14.813043 12.066088 32.758018  
C 15.762630 13.108047 32.076515  
C 15.946944 14.495771 32.796677  
C 15.273624 15.668036 32.011524  
C 14.001824 16.322891 32.647709  
C 12.691415 15.994062 31.842724  
C 11.654192 15.035688 32.517906  
Zr 15.440928 16.041206 34.360489  
Zr 12.347937 16.437710 34.148643  
Zr 13.722474 14.065048 32.562267  
Zr 13.737927 16.641531 36.965240  
Zr 16.034754 12.972116 34.428932  
Zr 15.931376 14.577895 37.133240  
Zr 13.534629 14.116577 35.647545  
Zr 10.996069 13.598021 34.090271

Zr 11.131729 15.172576 36.836491  
Zr 13.292757 11.438463 34.264645  
Zr 13.338697 14.140967 38.558525  
Zr 14.635415 11.882648 37.103661  
Zr 11.702710 12.264277 36.922123

05H60C13Nb

H 12.846286 12.633407 20.067707  
H 15.172122 11.984868 20.210257  
H 16.517101 14.003201 20.267723  
H 15.032084 15.908760 20.162394  
H 12.764569 15.057395 20.034456  
C 16.387737 14.010738 21.351564  
C 15.970575 15.207482 22.019241  
C 14.948460 15.851694 21.249313  
C 13.657959 15.853601 21.874653  
C 12.753952 15.032544 21.125692  
C 12.322270 13.854440 21.816586  
C 12.836332 12.689489 21.157768  
C 13.803061 11.962461 21.927004  
C 15.085773 12.059450 21.295834  
C 16.051998 12.804925 22.046412  
C 15.862525 15.205142 23.438713  
C 14.794774 15.944597 24.091484  
C 13.581954 15.844521 23.297215  
C 12.528383 15.101414 23.968689  
C 12.266747 13.871355 23.240438

C 12.620146 12.682744 23.998724  
C 13.729139 12.004260 23.347916  
C 14.946806 12.026995 24.141335  
C 15.947402 12.835187 23.467779  
C 16.286230 14.042416 24.200537  
C 14.706730 15.939676 25.494804  
C 13.402439 15.906889 26.145611  
C 12.463260 15.104192 25.374231  
C 12.064371 13.897812 26.087275  
C 12.553528 12.708708 25.402822  
C 13.552657 11.996863 26.189753  
C 14.856400 12.059540 25.543358  
C 15.809689 12.843801 26.316259  
C 16.183655 14.056884 25.603615  
C 15.723131 15.257825 26.287256  
C 13.326453 15.908115 27.550343  
C 12.299355 15.128729 28.225145  
C 11.996253 13.909276 27.491749  
C 12.385979 12.728930 28.248955  
C 13.474785 12.019738 27.592926  
C 14.692560 12.076248 28.390345  
C 15.716164 12.862884 27.719784  
C 16.022505 14.083144 28.447592  
C 15.633223 15.263903 27.689957  
C 14.544201 15.972785 28.345650  
C 12.210974 15.143638 29.629854  
C 11.806176 13.932577 30.337318

C 12.299418 12.739258 29.654030  
C 13.300630 12.032811 30.441238  
C 14.609879 12.085492 29.793205  
C 15.551478 12.886196 30.560585  
C 15.944863 14.095559 29.851767  
C 15.476252 15.298248 30.537510  
C 14.461586 15.988504 29.750402  
C 13.151158 15.953670 30.395971  
C 11.690845 13.944117 31.742331  
C 12.044695 12.698557 32.517307  
C 13.209504 12.017074 31.851263  
C 14.476107 12.015968 32.667400  
C 15.497331 12.878214 31.978453  
C 15.882847 14.122402 32.728909  
C 15.418873 15.326694 31.948759  
C 14.324558 16.114485 32.617203  
C 13.058303 15.995038 31.801966  
C 11.946725 15.234730 32.479687  
Nb 14.183788 16.400667 34.717808  
Nb 11.586950 15.418311 34.551582  
Nb 13.710064 14.040432 33.114033  
Nb 12.740170 16.276264 37.499001  
Nb 15.939787 14.206532 34.866123  
Nb 15.289538 15.463605 37.455345  
Nb 13.408096 14.159601 36.012459  
Nb 11.671283 12.639708 34.610115  
Nb 11.165707 13.927670 37.441399

Nb 14.361283 11.848645 34.798679  
Nb 13.237556 14.201432 38.926132  
Nb 15.333709 12.835838 37.409641  
Nb 12.888149 11.879034 37.365665

05H60C13Mo

H 12.843566 12.693449 20.093002  
H 15.156002 12.005935 20.223154  
H 16.509209 14.005050 20.296734  
H 15.026242 15.915781 20.207808  
H 12.750611 15.109465 20.083473  
C 16.383423 14.004478 21.380978  
C 15.964513 15.194859 22.057270  
C 14.948055 15.857160 21.294853  
C 13.662578 15.875921 21.927362  
C 12.743855 15.074961 21.174360  
C 12.318336 13.888274 21.855844  
C 12.828939 12.731747 21.183817  
C 13.788522 11.987453 21.942030  
C 15.072946 12.066819 21.309708  
C 16.046608 12.794406 22.068295  
C 15.862444 15.180586 23.479490  
C 14.807045 15.924802 24.141504  
C 13.590788 15.852119 23.349915  
C 12.532852 15.113399 24.018291  
C 12.265156 13.891090 23.281075  
C 12.615406 12.695148 24.027838

C 13.716337 12.014434 23.365557  
C 14.932837 12.012347 24.158783  
C 15.943801 12.812610 23.489342  
C 16.287884 14.013608 24.231485  
C 14.724769 15.911236 25.544508  
C 13.418951 15.900896 26.193083  
C 12.472615 15.105650 25.421783  
C 12.071434 13.896668 26.126972  
C 12.550684 12.709311 25.432550  
C 13.543139 11.980478 26.211889  
C 14.846678 12.032088 25.561962  
C 15.813993 12.796959 26.339338  
C 16.188765 14.016267 25.633703  
C 15.732124 15.211970 26.328806  
C 13.343480 15.895751 27.592707  
C 12.306192 15.124020 28.262644  
C 12.009013 13.901671 27.531706  
C 12.384996 12.710342 28.277773  
C 13.467456 11.994530 27.614132  
C 14.687436 12.028831 28.407345  
C 15.721396 12.807057 27.740986  
C 16.029739 14.023165 28.481413  
C 15.637974 15.207366 27.731997  
C 14.562023 15.935468 28.387892  
C 12.225044 15.130704 29.665394  
C 11.841204 13.915650 30.362406  
C 12.311069 12.717395 29.682106

C 13.306731 11.989120 30.465609  
C 14.605526 12.032620 29.813725  
C 15.556849 12.806746 30.590830  
C 15.941502 14.027183 29.884756  
C 15.473648 15.225801 30.565826  
C 14.477116 15.941843 29.791235  
C 13.169605 15.929255 30.445168  
C 11.736337 13.927152 31.772182  
C 12.093315 12.678802 32.533691  
C 13.223758 11.986928 31.874893  
C 14.446610 12.013536 32.746574  
C 15.481560 12.805857 32.001751  
C 15.846869 14.032280 32.744728  
C 15.405644 15.251585 31.977259  
C 14.342710 16.044502 32.680912  
C 13.076723 15.960932 31.854513  
C 11.972783 15.189735 32.548286  
Mo 14.168026 16.244108 34.814598  
Mo 11.764304 15.373991 34.680904  
Mo 13.698332 14.031559 33.154949  
Mo 12.640817 16.289284 37.428856  
Mo 15.968809 14.433902 34.782219  
Mo 15.087063 15.630227 37.319176  
Mo 13.559006 13.990977 35.926979  
Mo 11.549000 12.834302 34.535057  
Mo 11.211550 14.222342 37.105309  
Mo 14.356215 11.935266 34.909157

Mo 13.304910 14.309858 38.495087  
Mo 15.891425 13.273484 36.794533  
Mo 12.155124 11.917452 36.586185

05H60C13Tc

H 12.855570 12.623135 20.122044  
H 15.180480 11.962835 20.266466  
H 16.508787 13.980110 20.315063  
H 15.001810 15.870461 20.197983  
H 12.741308 15.031401 20.080788  
C 16.379379 13.994189 21.398596  
C 15.946861 15.188852 22.058121  
C 14.923499 15.825961 21.285587  
C 13.637351 15.835748 21.916779  
C 12.732029 15.012283 21.171843  
C 12.315816 13.832876 21.869213  
C 12.840121 12.674865 21.212120  
C 13.809082 11.955279 21.980238  
C 15.093303 12.040659 21.351536  
C 16.056606 12.789486 22.101824  
C 15.841980 15.196170 23.479395  
C 14.775708 15.936779 24.131695  
C 13.562809 15.831447 23.340179  
C 12.514039 15.087078 24.016598  
C 12.260263 13.854602 23.294277  
C 12.621220 12.671799 24.055510  
C 13.732568 12.000381 23.403343

C 14.946152 12.024811 24.199537  
C 15.949539 12.827902 23.521315  
C 16.279007 14.044274 24.245617  
C 14.688837 15.941392 25.532833  
C 13.383612 15.912378 26.184568  
C 12.448249 15.095490 25.420900  
C 12.055469 13.891315 26.140005  
C 12.550809 12.700574 25.459444  
C 13.555923 12.003283 26.250761  
C 14.857740 12.062970 25.601076  
C 15.820032 12.847434 26.365734  
C 16.179953 14.065101 25.645416  
C 15.708081 15.264536 26.323408  
C 13.310191 15.921652 27.584139  
C 12.286541 15.139231 28.263739  
C 11.990758 13.910696 27.544270  
C 12.381423 12.732341 28.305567  
C 13.480910 12.034618 27.654381  
C 14.700872 12.099542 28.443417  
C 15.732268 12.872703 27.763472  
C 16.033424 14.105051 28.484081  
C 15.619937 15.275618 27.724659  
C 14.534022 15.994400 28.376223  
C 12.210711 15.158568 29.670080  
C 11.835839 13.954317 30.387318  
C 12.309192 12.759077 29.708181  
C 13.328143 12.090793 30.500433

C 14.623302 12.128030 29.850098  
C 15.601122 12.905431 30.608253  
C 15.955671 14.123831 29.885235  
C 15.462679 15.312802 30.558596  
C 14.454612 16.011278 29.777225  
C 13.146345 15.986008 30.427685  
C 11.743169 13.975537 31.803146  
C 12.090714 12.763569 32.625729  
C 13.244946 12.101736 31.919273  
C 14.498926 12.106636 32.723572  
C 15.540833 12.913113 32.011551  
C 15.837538 14.162193 32.783920  
C 15.395042 15.339900 31.972710  
C 14.297975 16.094650 32.661942  
C 13.058140 16.025854 31.828371  
C 11.992506 15.242756 32.539558  
Tc 14.431607 16.233212 34.737335  
Tc 11.788458 15.502287 34.599754  
Tc 13.716960 14.083874 33.164207  
Tc 12.901567 16.398996 36.756195  
Tc 15.873406 14.352186 34.870480  
Tc 14.683119 15.124237 37.767784  
Tc 13.519745 14.071028 35.772926  
Tc 11.794234 12.671177 34.722900  
Tc 11.079929 14.274323 36.511620  
Tc 14.479310 11.964203 34.794456  
Tc 12.834463 13.634582 38.224686

Tc 15.430434 12.840867 36.969044  
Tc 13.015027 11.729237 36.781971

05H60C13Ru

H 12.846564 12.658840 20.117977  
H 15.165612 11.980664 20.259579  
H 16.501890 13.983850 20.317205  
H 15.019667 15.889462 20.209543  
H 12.749434 15.073215 20.090057  
C 16.378151 13.994417 21.401518  
C 15.958279 15.189691 22.066870  
C 14.941071 15.841003 21.296955  
C 13.655159 15.858286 21.929234  
C 12.742019 15.046780 21.181150  
C 12.319019 13.865948 21.871822  
C 12.832992 12.706190 21.208260  
C 13.794252 11.972128 21.973745  
C 15.079139 12.051705 21.345181  
C 16.047148 12.789883 22.100327  
C 15.856531 15.190145 23.488470  
C 14.797123 15.936293 24.145025  
C 13.582424 15.847410 23.352158  
C 12.526801 15.110027 24.025518  
C 12.265177 13.880769 23.296127  
C 12.615879 12.691123 24.051407  
C 13.719536 12.009142 23.396101  
C 14.934451 12.019958 24.195200



C 15.941154 12.821470 23.521139  
C 16.281862 14.030264 24.251558  
C 14.712194 15.937868 25.546412  
C 13.404881 15.917417 26.195400  
C 12.461637 15.113123 25.427248  
C 12.060376 13.905549 26.138561  
C 12.543714 12.712616 25.453547  
C 13.539617 11.995558 26.243723  
C 14.845710 12.052604 25.595474  
C 15.805455 12.833531 26.366848  
C 16.183247 14.046725 25.651850  
C 15.725746 15.249897 26.337795  
C 13.326844 15.921823 27.593588  
C 12.290011 15.144725 28.265297  
C 11.990131 13.918432 27.539618  
C 12.367516 12.730972 28.295956  
C 13.459790 12.016778 27.642262  
C 14.680990 12.073155 28.439470  
C 15.712070 12.854381 27.766422  
C 16.023666 14.076933 28.496744  
C 15.635365 15.259621 27.737249  
C 14.547262 15.979718 28.390081  
C 12.206489 15.158320 29.665714  
C 11.821959 13.947912 30.376398  
C 12.286952 12.747903 29.697248  
C 13.287477 12.038018 30.488832  
C 14.595533 12.090675 29.842026

C 15.544436 12.883280 30.610075  
C 15.937202 14.091813 29.897783  
C 15.465989 15.291585 30.578545  
C 14.460865 15.992517 29.791441  
C 13.152073 15.961097 30.434254  
C 11.713940 13.964602 31.787560  
C 12.093707 12.764083 32.593384  
C 13.196612 12.028977 31.896046  
C 14.431270 12.095973 32.738605  
C 15.480032 12.884254 32.023285  
C 15.794010 14.124386 32.797592  
C 15.400025 15.321424 31.989361  
C 14.292890 16.047495 32.682552  
C 13.058147 16.001390 31.840519  
C 12.006506 15.212310 32.557568  
Ru 14.217229 16.240700 34.735466  
Ru 11.734535 15.335656 34.594868  
Ru 13.694050 14.055286 33.163982  
Ru 12.689003 16.234880 36.844482  
Ru 15.843109 14.155513 34.856926  
Ru 15.250006 15.497598 37.008293  
Ru 13.526377 14.091630 35.877724  
Ru 11.825257 12.689405 34.634365  
Ru 11.201493 14.026462 36.782402  
Ru 14.364923 11.961729 34.796997  
Ru 13.383247 14.120096 38.249626  
Ru 15.340519 12.838460 37.045757

Ru 12.836576 11.924480 36.904655

05H60C13Rh

H 12.851232 12.663399 20.122889

H 15.161428 11.988984 20.264282

H 16.494343 13.982779 20.320232

H 15.017511 15.879707 20.213348

H 12.757384 15.066839 20.094955

C 16.377777 13.994579 21.405287

C 15.956869 15.188679 22.071257

C 14.941051 15.839159 21.301254

C 13.655951 15.854959 21.933590

C 12.742880 15.044755 21.186071

C 12.319327 13.865288 21.876909

C 12.832652 12.706294 21.213264

C 13.794218 11.974208 21.979015

C 15.078128 12.053123 21.350508

C 16.045366 12.791512 22.104647

C 15.855988 15.189898 23.493498

C 14.796222 15.935977 24.150827

C 13.582116 15.845769 23.357012

C 12.526179 15.109043 24.030928

C 12.263309 13.879918 23.301334

C 12.615275 12.690475 24.057644

C 13.719183 12.010141 23.401991

C 14.934516 12.021300 24.200787

C 15.940990 12.822266 23.525854

C 16.281700 14.030333 24.257359

C 14.712609 15.939942 25.549955

C 13.403688 15.916883 26.199404

C 12.458397 15.113556 25.430149

C 12.054151 13.904581 26.142628

C 12.541449 12.710499 25.457289

C 13.540513 11.996267 26.248390

C 14.847733 12.051383 25.599106

C 15.809815 12.831828 26.372017

C 16.187035 14.047085 25.655809

C 15.728056 15.251223 26.342361

C 13.324758 15.923387 27.593218

C 12.285398 15.145557 28.265926

C 11.980104 13.917774 27.537561

C 12.364605 12.729899 28.297071

C 13.459750 12.015798 27.642662

C 14.682573 12.072870 28.441210

C 15.720222 12.850868 27.766390

C 16.028656 14.077466 28.498360

C 15.640375 15.262856 27.736994

C 14.547393 15.980873 28.391308

C 12.192862 15.164124 29.659922

C 11.798559 13.946942 30.369801

C 12.275546 12.740948 29.692009

C 13.286410 12.035689 30.482941

C 14.601140 12.081509 29.837778

C 15.560867 12.875058 30.606649

C 15.953033 14.092813 29.894566  
C 15.477160 15.299131 30.573412  
C 14.463708 16.002974 29.785929  
C 13.147701 15.966167 30.427570  
C 11.687424 13.963942 31.770947  
C 12.131396 12.799386 32.574265  
C 13.195628 12.028736 31.885550  
C 14.417063 12.147851 32.718002  
C 15.498305 12.876096 32.011372  
C 15.744667 14.123840 32.773983  
C 15.411285 15.329411 31.977213  
C 14.279338 15.999504 32.662720  
C 13.053501 16.006260 31.828316  
C 12.046508 15.180406 32.538441  
Rh 14.247121 16.325743 34.679718  
Rh 11.665094 15.383485 34.534843  
Rh 13.685055 14.058509 33.303219  
Rh 12.691128 16.237194 36.847267  
Rh 15.936979 14.158407 34.808372  
Rh 15.251157 15.500782 37.012455  
Rh 13.528714 14.090899 35.875267  
Rh 11.759461 12.634109 34.575989  
Rh 11.199857 14.025125 36.784359  
Rh 14.400461 11.877235 34.744205  
Rh 13.372673 14.121995 38.421139  
Rh 15.343026 12.834120 37.049706  
Rh 12.838296 11.921636 36.909523

05H60C13Pd

H 12.852487 12.661687 20.115335  
H 15.162606 11.987829 20.256601  
H 16.495649 13.981630 20.313244  
H 15.019160 15.878543 20.204790  
H 12.757325 15.064999 20.085705  
C 16.378681 13.992819 21.398207  
C 15.957890 15.186952 22.063190  
C 14.941971 15.837196 21.292477  
C 13.657446 15.852031 21.924429  
C 12.744154 15.042412 21.176712  
C 12.320477 13.864178 21.868893  
C 12.833478 12.704931 21.205608  
C 13.795402 11.974128 21.971485  
C 15.078758 12.052730 21.342724  
C 16.045567 12.790049 22.097534  
C 15.856235 15.189207 23.485914  
C 14.796960 15.934888 24.142633  
C 13.583723 15.843803 23.348907  
C 12.528544 15.108134 24.022827  
C 12.265003 13.879961 23.293558  
C 12.616955 12.691342 24.050253  
C 13.720417 12.011094 23.394831  
C 14.934425 12.021547 24.194712  
C 15.940536 12.821932 23.519409  
C 16.280838 14.030298 24.249947

C 14.712910 15.939571 25.541885  
C 13.404474 15.915000 26.191341  
C 12.459831 15.112925 25.422216  
C 12.055846 13.904547 26.135332  
C 12.542703 12.710897 25.450134  
C 13.540597 11.996717 26.241673  
C 14.847357 12.051082 25.593237  
C 15.808606 12.833137 26.365107  
C 16.186152 14.047220 25.648577  
C 15.727551 15.251286 26.334620  
C 13.324051 15.923082 27.585379  
C 12.287941 15.143540 28.258713  
C 11.980330 13.917371 27.529932  
C 12.365647 12.730958 28.289680  
C 13.459271 12.015121 27.636196  
C 14.681608 12.075908 28.434080  
C 15.719574 12.851976 27.759665  
C 16.024666 14.078589 28.490322  
C 15.640287 15.264069 27.729322  
C 14.545979 15.979353 28.382891  
C 12.194004 15.164329 29.654209  
C 11.809260 13.948151 30.365568  
C 12.276550 12.742365 29.685352  
C 13.290447 12.047751 30.476767  
C 14.601663 12.083400 29.831535  
C 15.553435 12.882188 30.600899  
C 15.951649 14.094422 29.887506

C 15.469849 15.295375 30.566416  
C 14.463646 16.004063 29.778727  
C 13.152292 15.956806 30.423172  
C 11.693494 13.964817 31.770987  
C 12.131384 12.798573 32.561577  
C 13.198510 12.036799 31.883780  
C 14.418924 12.147571 32.703789  
C 15.494852 12.880950 32.010246  
C 15.747756 14.125914 32.759357  
C 15.407660 15.328175 31.973307  
C 14.281916 16.003433 32.649963  
C 13.056541 16.001461 31.828833  
C 12.046561 15.181331 32.525978  
Pd 14.324649 16.408979 34.628223  
Pd 11.568972 15.407765 34.475143  
Pd 13.679968 14.061852 33.400822  
Pd 12.614704 16.319387 36.951698  
Pd 16.037899 14.209888 34.757446  
Pd 15.310577 15.548023 37.108288  
Pd 13.535082 14.095536 35.866226  
Pd 11.681710 12.567139 34.512348  
Pd 11.134697 14.061593 36.911789  
Pd 14.399317 11.772902 34.688610  
Pd 13.342037 14.107688 38.521797  
Pd 15.400837 12.744123 37.158909  
Pd 12.849092 11.860578 37.040504

05H60C13Ag

|                                 |                                 |
|---------------------------------|---------------------------------|
| H 12.889423 12.667992 20.061031 | C 13.399491 15.913987 26.134169 |
| H 15.182009 11.997080 20.214531 | C 12.449266 15.118546 25.360626 |
| H 16.488283 13.972420 20.270233 | C 12.056849 13.906832 26.075260 |
| H 15.020163 15.849483 20.155859 | C 12.548596 12.716553 25.394657 |
| H 12.733052 15.088808 20.023129 | C 13.544615 12.002940 26.186304 |
| C 16.387720 13.987535 21.357256 | C 14.852345 12.053778 25.542992 |
| C 15.958813 15.180614 22.014780 | C 15.812492 12.834910 26.318140 |
| C 14.944126 15.839166 21.244825 | C 16.185951 14.049651 25.602304 |
| C 13.660795 15.845481 21.862314 | C 15.719846 15.252537 26.283226 |
| C 12.699221 15.077234 21.113729 | C 13.319423 15.922972 27.532745 |
| C 12.341084 13.865656 21.800787 | C 12.282698 15.146813 28.204880 |
| C 12.839515 12.699286 21.150967 | C 11.979270 13.921244 27.474255 |
| C 13.813832 11.981174 21.921364 | C 12.369686 12.738320 28.234888 |
| C 15.098633 12.048079 21.301758 | C 13.461107 12.021881 27.583107 |
| C 16.073391 12.779399 22.059168 | C 14.681501 12.079293 28.381346 |
| C 15.867591 15.186600 23.438635 | C 15.720195 12.855450 27.713310 |
| C 14.797011 15.922380 24.086021 | C 16.021759 14.083095 28.439859 |
| C 13.588670 15.839873 23.288944 | C 15.634034 15.266270 27.679916 |
| C 12.524483 15.110525 23.961243 | C 14.540357 15.979239 28.329496 |
| C 12.281164 13.878248 23.230335 | C 12.195150 15.161970 29.604660 |
| C 12.634508 12.696409 23.992504 | C 11.820875 13.948160 30.320690 |
| C 13.737920 12.009697 23.346622 | C 12.282162 12.747857 29.634897 |
| C 14.948254 12.023571 24.143713 | C 13.296152 12.061848 30.427008 |
| C 15.979372 12.805283 23.476204 | C 14.601816 12.088364 29.779825 |
| C 16.288162 14.029366 24.201859 | C 15.544963 12.890082 30.549990 |
| C 14.705903 15.935471 25.487883 | C 15.946379 14.097677 29.838871 |
|                                 | C 15.457111 15.289874 30.522118 |

C 14.458484 15.999347 29.729408  
C 13.153817 15.941814 30.377354  
C 11.735507 13.963759 31.731749  
C 12.132467 12.792577 32.506241  
C 13.214554 12.076061 31.838814  
C 14.429170 12.141891 32.645031  
C 15.466690 12.903303 31.960188  
C 15.759934 14.125472 32.703011  
C 15.375235 15.304943 31.933281  
C 14.281738 16.006624 32.599167  
C 13.069043 15.959609 31.788134  
C 12.044338 15.180710 32.473568  
Ag 14.266144 16.548557 34.799938  
Ag 11.462697 15.474375 34.646172  
Ag 13.674067 14.063231 33.738472  
Ag 12.645835 16.507456 37.180573  
Ag 16.160933 14.157765 34.936550  
Ag 15.430157 15.624417 37.335419  
Ag 13.449864 14.080967 36.387180  
Ag 11.577602 12.512266 34.691830  
Ag 10.878654 14.030669 37.094780  
Ag 14.436528 11.651648 34.859741  
Ag 13.334108 14.120909 39.064644  
Ag 15.545605 12.735615 37.384987  
Ag 12.809641 11.629037 37.238548

H 12.822392 12.731478 20.143221  
H 15.110867 11.842006 20.218708  
H 16.222736 14.034788 20.207632  
H 14.795247 15.968794 20.183781  
H 12.609091 15.127847 20.143341  
C 16.208567 14.040295 21.299183  
C 15.797416 15.231150 21.982769  
C 14.770842 15.926237 21.274397  
C 13.508898 15.963615 21.962337  
C 12.620822 15.099759 21.234739  
C 12.291875 13.889254 21.916023  
C 12.794750 12.732630 21.234581  
C 13.754812 11.982995 21.956135  
C 15.057006 11.928468 21.305115  
C 15.962078 12.833786 21.997913  
C 15.765859 15.244453 23.412754  
C 14.745130 15.990774 24.117388  
C 13.487082 15.947070 23.374941  
C 12.499511 15.127595 24.071764  
C 12.259356 13.900181 23.345751  
C 12.658302 12.719166 24.076580  
C 13.720222 12.020736 23.381601  
C 14.967022 12.016200 24.140835  
C 15.913054 12.867505 23.425785  
C 16.220600 14.084721 24.148428  
C 14.716353 15.974849 25.521585  
C 13.433996 15.928493 26.221870

05H60C13Cd

C 12.479094 15.115500 25.475784  
C 12.134454 13.892899 26.192581  
C 12.620264 12.716980 25.485146  
C 13.638024 12.000169 26.233316  
C 14.926032 12.046015 25.537052  
C 15.885756 12.865291 26.278059  
C 16.199873 14.087603 25.558020  
C 15.761532 15.280920 26.268658  
C 13.407348 15.919303 27.622438  
C 12.410163 15.117886 28.326477  
C 12.092712 13.895901 27.594004  
C 12.529299 12.714227 28.329947  
C 13.602675 12.011375 27.634741  
C 14.852337 12.081594 28.385424  
C 15.852801 12.874885 27.679411  
C 16.160433 14.101604 28.404221  
C 15.737126 15.288043 27.668514  
C 14.660094 15.982479 28.370647  
C 12.378687 15.120942 29.731085  
C 12.062969 13.899637 30.454967  
C 12.491687 12.710803 29.734720  
C 13.551268 12.049818 30.482414  
C 14.825716 12.082780 29.786009  
C 15.768130 12.904085 30.531178  
C 16.140038 14.106306 29.808401  
C 15.661472 15.278742 30.520592  
C 14.634525 15.994115 29.771437

C 13.364687 15.892334 30.473375  
C 12.054243 13.902111 31.878775  
C 12.512322 12.754558 32.640770  
C 13.534472 12.048964 31.899632  
C 14.764010 12.115396 32.650063  
C 15.753949 12.903180 31.954742  
C 16.041189 14.113806 32.681866  
C 15.651335 15.287644 31.940495  
C 14.582680 15.962029 32.638973  
C 13.348207 15.890352 31.892553  
C 12.413065 15.081124 32.634140  
Cd 14.394940 16.968756 34.633656  
Cd 10.656670 16.381598 34.538162  
Cd 13.100710 14.072811 34.620186  
Cd 12.651864 16.412691 36.750969  
Cd 16.243544 14.158601 34.900623  
Cd 15.662601 15.986616 37.075394  
Cd 13.736714 14.116512 38.302578  
Cd 11.090176 11.486221 34.374134  
Cd 9.289773 13.742700 35.097443  
Cd 14.585959 11.267090 34.704609  
Cd 10.840507 14.062890 37.646881  
Cd 15.772996 12.343674 37.109596  
Cd 12.774992 11.753594 36.795990

05H60C13Lu

H 13.020151 12.734054 20.033895

H 15.284580 11.842138 20.208931  
H 16.417202 14.006747 20.252728  
H 15.008754 15.962852 20.166409  
H 12.816595 15.140939 20.023865  
C 16.353071 14.013186 21.342855  
C 15.915928 15.204017 22.005682  
C 14.932754 15.916769 21.254564  
C 13.640455 15.966330 21.885023  
C 12.778566 15.110742 21.114649  
C 12.420107 13.897457 21.778996  
C 12.941659 12.737110 21.123049  
C 13.860395 11.975325 21.888348  
C 15.184780 11.923507 21.292805  
C 16.072720 12.806702 22.029831  
C 15.819416 15.214145 23.436201  
C 14.782629 15.977855 24.094170  
C 13.557441 15.944372 23.295731  
C 12.532746 15.131015 23.949581  
C 12.326188 13.906652 23.209309  
C 12.679447 12.722184 23.958130  
C 13.764255 12.013443 23.312431  
C 14.977885 11.995461 24.124563  
C 15.960149 12.840055 23.453533  
C 16.238911 14.056322 24.189819  
C 14.691702 15.958326 25.496809  
C 13.380479 15.927631 26.141422  
C 12.454914 15.116494 25.353354

C 12.071582 13.896300 26.054182  
C 12.583232 12.720666 25.365725  
C 13.560290 11.993274 26.155930  
C 14.877142 12.030045 25.518436  
C 15.813858 12.838777 26.304274  
C 16.155354 14.061275 25.599070  
C 15.696302 15.256203 26.289701  
C 13.296659 15.912682 27.540031  
C 12.262621 15.119339 28.197798  
C 11.978456 13.897711 27.453163  
C 12.367596 12.709793 28.204407  
C 13.467497 12.007730 27.555460  
C 14.683409 12.052894 28.360985  
C 15.713646 12.850812 27.702707  
C 16.001228 14.075602 28.441917  
C 15.607800 15.260638 27.689678  
C 14.515074 15.972655 28.346495  
C 12.177437 15.117147 29.598080  
C 11.788388 13.900670 30.295803  
C 12.277821 12.713961 29.604185  
C 13.284418 12.025406 30.395750  
C 14.590537 12.067528 29.757900  
C 15.532308 12.859194 30.541643  
C 15.909342 14.078731 29.843569  
C 15.439693 15.274675 30.536369  
C 14.424536 15.966625 29.745901  
C 13.115067 15.911499 30.383707



C 11.673283 13.896188 31.708975  
C 12.011368 12.650864 32.466183  
C 13.186065 12.008303 31.814762  
C 14.430748 11.982089 32.628040  
C 15.455386 12.846422 31.956287  
C 15.816162 14.074955 32.711803  
C 15.361937 15.282961 31.949188  
C 14.256179 16.041101 32.615784  
C 13.015077 15.922202 31.796951  
C 11.909934 15.156161 32.458523  
Lu 14.459147 17.043165 34.657951  
Lu 11.068542 15.883434 34.459431  
Lu 13.620468 13.975908 33.528904  
Lu 12.468866 16.833467 37.477264  
Lu 16.689232 14.218291 34.818798  
Lu 15.698377 15.904570 37.628746  
Lu 13.537003 14.160333 36.372944  
Lu 11.101179 12.168040 34.503948  
Lu 10.631342 14.092230 37.305641  
Lu 14.747255 11.132616 34.726665  
Lu 13.346357 14.158178 39.405754  
Lu 15.806166 12.537370 37.679047  
Lu 12.704758 11.417487 37.428871

05H60C13Hf

H 12.865944 12.633486 20.058092  
H 15.183588 11.990702 20.206678

H 16.517508 14.005634 20.267481  
H 15.035121 15.902893 20.157597  
H 12.782570 15.047104 20.025644  
C 16.392330 14.014308 21.351746  
C 15.969629 15.208876 22.016758  
C 14.951101 15.855469 21.244810  
C 13.659542 15.851523 21.866734  
C 12.760212 15.029035 21.116753  
C 12.333076 13.849606 21.805372  
C 12.846344 12.684179 21.148129  
C 13.813245 11.960809 21.919960  
C 15.097061 12.057685 21.292625  
C 16.055380 12.809500 22.045223  
C 15.858782 15.207342 23.437927  
C 14.789639 15.945139 24.088787  
C 13.580734 15.840915 23.291275  
C 12.530213 15.094776 23.959856  
C 12.272423 13.866129 23.231619  
C 12.623070 12.679654 23.991425  
C 13.733740 12.002570 23.342524  
C 14.947594 12.030965 24.140463  
C 15.946499 12.840178 23.468563  
C 16.281067 14.046686 24.201712  
C 14.698282 15.940881 25.492006  
C 13.392181 15.908283 26.139400  
C 12.459926 15.099480 25.366009  
C 12.058483 13.894514 26.079344

C 12.552069 12.705774 25.395687  
C 13.549953 11.995939 26.187073  
C 14.854477 12.063187 25.542971  
C 15.808468 12.846267 26.318266  
C 16.176695 14.061367 25.604946  
C 15.715317 15.262571 26.287014  
C 13.311664 15.911601 27.541113  
C 12.278614 15.131965 28.212288  
C 11.984351 13.906990 27.481428  
C 12.370352 12.724357 28.241283  
C 13.468046 12.020876 27.587809  
C 14.685234 12.081591 28.387911  
C 15.713864 12.866325 27.717993  
C 16.015945 14.090443 28.446585  
C 15.621988 15.270030 27.686710  
C 14.529882 15.982156 28.339172  
C 12.193855 15.144217 29.611954  
C 11.798347 13.932644 30.323896  
C 12.288495 12.738913 29.641609  
C 13.293113 12.033648 30.432047  
C 14.601152 12.095821 29.786804  
C 15.556449 12.885076 30.557062  
C 15.931943 14.103570 29.846588  
C 15.464211 15.305957 30.530098  
C 14.445159 15.991556 29.738169  
C 13.135261 15.950975 30.381660  
C 11.669073 13.946364 31.731598

C 12.017894 12.690353 32.499973  
C 13.198070 12.009553 31.842228  
C 14.475760 12.004896 32.652470  
C 15.508999 12.874144 31.968945  
C 15.890882 14.136170 32.713772  
C 15.411360 15.345493 31.941214  
C 14.303144 16.145149 32.600342  
C 13.034325 16.007376 31.789223  
C 11.910704 15.245988 32.464817  
Hf 14.358702 16.606106 34.761024  
Hf 11.435181 15.577435 34.600979  
Hf 13.688463 14.051647 33.135933  
Hf 12.612247 16.455734 37.394821  
Hf 16.236040 14.143819 34.898552  
Hf 15.415164 15.626133 37.564003  
Hf 13.519999 14.089367 36.045094  
Hf 11.506523 12.469600 34.643192  
Hf 10.955324 14.040483 37.329803  
Hf 14.482363 11.588045 34.826801  
Hf 13.356972 14.125710 38.949890  
Hf 15.493863 12.700360 37.604008  
Hf 12.738760 11.717943 37.458679

05H60C13Ta

H 12.850345 12.650253 20.081573  
H 15.169612 11.978239 20.228569  
H 16.522068 13.983414 20.286142

|                                 |                                 |
|---------------------------------|---------------------------------|
| H 15.035705 15.893883 20.174356 | C 13.537019 12.004387 26.209011 |
| H 12.763069 15.063316 20.047001 | C 14.839406 12.061213 25.563515 |
| C 16.390703 13.994162 21.369631 | C 15.801179 12.836608 26.335327 |
| C 15.968806 15.192122 22.033298 | C 16.179323 14.048750 25.620985 |
| C 14.952080 15.842651 21.261414 | C 15.724116 15.253269 26.304214 |
| C 13.660932 15.854856 21.886465 | C 13.325233 15.914172 27.563791 |
| C 12.749744 15.040915 21.138168 | C 12.287440 15.144476 28.236702 |
| C 12.319079 13.862751 21.829895 | C 11.988468 13.921599 27.508102 |
| C 12.831491 12.698346 21.171919 | C 12.363792 12.737752 28.265745 |
| C 13.795333 11.969041 21.939825 | C 13.456141 12.031713 27.612698 |
| C 15.081974 12.049874 21.314220 | C 14.673043 12.080145 28.408587 |
| C 16.050091 12.789817 22.067062 | C 15.703384 12.858724 27.736710 |
| C 15.860823 15.192513 23.453657 | C 16.019478 14.078819 28.464554 |
| C 14.796807 15.937605 24.106123 | C 15.630362 15.260653 27.705820 |
| C 13.584639 15.845360 23.310726 | C 14.543813 15.979683 28.360106 |
| C 12.527535 15.108551 23.982456 | C 12.204139 15.157408 29.639530 |
| C 12.263409 13.880277 23.255653 | C 11.802413 13.948513 30.349972 |
| C 12.612542 12.692479 24.013708 | C 12.282772 12.752403 29.669231 |
| C 13.718255 12.011533 23.363115 | C 13.282460 12.039294 30.457726 |
| C 14.931441 12.025311 24.159771 | C 14.589600 12.095175 29.811535 |
| C 15.941490 12.823137 23.487816 | C 15.552530 12.875877 30.579445 |
| C 16.282743 14.031426 24.219002 | C 15.934793 14.091250 29.866566 |
| C 14.709112 15.936167 25.509623 | C 15.475985 15.296882 30.549963 |
| C 13.404065 15.911750 26.159767 | C 14.459474 15.988943 29.762341 |
| C 12.463419 15.110223 25.389219 | C 13.150328 15.959680 30.407448 |
| C 12.056835 13.907921 26.102533 | C 11.690753 13.962859 31.755430 |
| C 12.544363 12.719000 25.420296 | C 12.020544 12.710264 32.538830 |

C 13.193745 12.029886 31.864439  
C 14.460441 12.019978 32.688622  
C 15.494369 12.871979 31.987989  
C 15.856480 14.120622 32.749577  
C 15.414032 15.324990 31.957918  
C 14.314069 16.099306 32.636719  
C 13.056914 16.001595 31.812201  
C 11.944444 15.249928 32.505829  
Ta 14.264806 16.412045 34.803131  
Ta 11.576181 15.426265 34.636410  
Ta 13.679762 14.041120 33.175755  
Ta 12.642792 16.351879 37.144333  
Ta 16.025030 14.152450 34.932186  
Ta 15.343477 15.582766 37.317753  
Ta 13.533993 14.090165 35.922424  
Ta 11.678703 12.569144 34.660545  
Ta 11.097993 14.021873 37.083900  
Ta 14.419980 11.779483 34.844421  
Ta 13.412518 14.159211 38.664223  
Ta 15.431296 12.770762 37.353050  
Ta 12.802475 11.837148 37.211681

05H60C13W

H 12.836562 12.641621 20.105192  
H 15.154446 11.966760 20.237020  
H 16.495556 13.980329 20.287264  
H 15.000153 15.886756 20.185368

H 12.733226 15.053138 20.071373  
C 16.369396 13.990143 21.371260  
C 15.946240 15.184775 22.037380  
C 14.924034 15.834671 21.272852  
C 13.638961 15.846997 21.907602  
C 12.727791 15.029395 21.162476  
C 12.307108 13.849386 21.857700  
C 12.824598 12.690350 21.195541  
C 13.790148 11.960481 21.958694  
C 15.072451 12.040978 21.322739  
C 16.042454 12.783929 22.071192  
C 15.846194 15.184208 23.459318  
C 14.788140 15.930389 24.117928  
C 13.570089 15.837918 23.330889  
C 12.519102 15.097485 24.009562  
C 12.257642 13.867606 23.283157  
C 12.616853 12.681004 24.040218  
C 13.720417 12.001487 23.381672  
C 14.938519 12.013093 24.171785  
C 15.942366 12.814910 23.491852  
C 16.278557 14.026491 24.220989  
C 14.707394 15.930446 25.519869  
C 13.403672 15.912324 26.176624  
C 12.461446 15.101980 25.414993  
C 12.068892 13.897135 26.133907  
C 12.554267 12.706905 25.445354  
C 13.555933 11.996141 26.228659

C 14.856128 12.045912 25.573969  
C 15.823448 12.824777 26.338940  
C 16.184402 14.042575 25.622755  
C 15.720649 15.241227 26.306484  
C 13.334474 15.918393 27.577984  
C 12.313923 15.136702 28.262442  
C 12.010659 13.912265 27.539722  
C 12.401236 12.729951 28.296547  
C 13.487292 12.021688 27.633131  
C 14.709894 12.067707 28.416950  
C 15.737825 12.844894 27.737915  
C 16.035488 14.072204 28.462776  
C 15.634341 15.248523 27.709812  
C 14.558383 15.975796 28.367153  
C 12.239879 15.155237 29.669769  
C 11.857931 13.947882 30.381824  
C 12.332548 12.747151 29.700855  
C 13.349865 12.056499 30.484722  
C 14.640086 12.083693 29.821972  
C 15.603823 12.865248 30.582838  
C 15.961490 14.086217 29.866457  
C 15.486774 15.283150 30.543879  
C 14.483337 15.992539 29.770226  
C 13.179841 15.973115 30.433430  
C 11.762410 13.970435 31.790583  
C 12.109671 12.708826 32.569134  
C 13.281107 12.054037 31.901445

C 14.536114 12.037938 32.744209  
C 15.551319 12.864522 31.989210  
C 15.902076 14.107533 32.733250  
C 15.429243 15.307482 31.954866  
C 14.364690 16.096256 32.663486  
C 13.094927 16.009228 31.838257  
C 11.999935 15.252823 32.551903  
W 14.226562 16.291325 34.758209  
W 11.765864 15.409258 34.676750  
W 13.731116 14.041441 33.155525  
W 12.411027 16.187973 37.287724  
W 15.976335 14.415935 34.794388  
W 14.939872 15.325768 37.493088  
W 13.517783 14.037567 35.923069  
W 11.589890 12.784071 34.585941  
W 10.998607 14.238905 37.070126  
W 14.477781 11.959225 34.886303  
W 12.998499 13.920384 38.483566  
W 15.861616 13.078512 36.839485  
W 12.437229 11.887980 36.736515

05H60C13Re

H 12.881142 12.632804 20.109962  
H 15.205458 11.984789 20.275146  
H 16.552038 13.987172 20.337402  
H 15.060060 15.886456 20.213549  
H 12.804625 15.046475 20.075552

C 16.416225 13.999684 21.420227  
C 15.988594 15.196700 22.080025  
C 14.971753 15.836782 21.300226  
C 13.681851 15.843315 21.921455  
C 12.783055 15.024038 21.166504  
C 12.341227 13.850348 21.855982  
C 12.860522 12.686442 21.199802  
C 13.822443 11.964662 21.977894  
C 15.110062 12.058321 21.359934  
C 16.072502 12.797227 22.118784  
C 15.873687 15.199701 23.499647  
C 14.802912 15.941905 24.147306  
C 13.597260 15.836635 23.345413  
C 12.535688 15.103371 24.007421  
C 12.272557 13.872046 23.278135  
C 12.622093 12.686558 24.042170  
C 13.734449 12.008201 23.399342  
C 14.943356 12.025772 24.207130  
C 15.953269 12.830728 23.539001  
C 16.285236 14.038898 24.268642  
C 14.708736 15.942808 25.547955  
C 13.402713 15.892689 26.186197  
C 12.457706 15.108419 25.409718  
C 12.021460 13.906582 26.118521  
C 12.535513 12.714435 25.443802  
C 13.530947 12.018761 26.243586  
C 14.840889 12.065099 25.605934

C 15.792608 12.849497 26.382786  
C 16.177189 14.058569 25.669949  
C 15.729492 15.269316 26.350443  
C 13.316712 15.892321 27.593571  
C 12.260797 15.144217 28.247311  
C 11.932030 13.924627 27.511103  
C 12.331087 12.749781 28.281013  
C 13.435855 12.052284 27.646671  
C 14.648253 12.097869 28.451309  
C 15.686592 12.874557 27.783772  
C 15.993441 14.092434 28.510098  
C 15.633841 15.280962 27.746872  
C 14.527794 15.988341 28.395229  
C 12.162891 15.152832 29.649105  
C 11.681310 13.958821 30.357325  
C 12.229427 12.770703 29.686235  
C 13.242393 12.116192 30.479120  
C 14.551420 12.124871 29.849806  
C 15.492496 12.916418 30.631479  
C 15.900961 14.109152 29.920944  
C 15.470022 15.328523 30.598837  
C 14.436894 15.996407 29.793100  
C 13.136852 15.882531 30.418243  
C 11.555425 13.977679 31.740673  
C 11.955978 12.776764 32.551704  
C 13.143081 12.124368 31.897635  
C 14.382671 12.072859 32.757977

C 15.415887 12.924769 32.050632  
C 15.816447 14.155169 32.813457  
C 15.402795 15.358469 31.994596  
C 14.274367 16.103020 32.670589  
C 13.031500 15.903771 31.840809  
C 11.898479 15.217548 32.541504  
Re 13.875107 16.428341 34.661282  
Re 11.729153 15.419791 34.631157  
Re 13.649986 14.064790 33.159874  
Re 12.650655 15.648278 37.546803  
Re 15.992428 14.296100 34.917488  
Re 15.128435 15.912329 36.683506  
Re 13.631336 14.105102 35.771526  
Re 11.809006 12.561764 34.601547  
Re 11.127036 13.814606 36.625710  
Re 14.205335 11.864793 34.846977  
Re 14.302489 13.866295 38.189598  
Re 15.756746 12.622576 36.589146  
Re 12.825270 12.161772 37.259136

05H60C13Os

H 12.844193 12.655183 20.121307  
H 15.165698 11.976892 20.263565  
H 16.505186 13.983213 20.319469  
H 15.019777 15.891465 20.212124  
H 12.745545 15.072588 20.093098  
C 16.379147 13.993814 21.403469

C 15.957905 15.188827 22.068535  
C 14.940697 15.840124 21.299278  
C 13.654517 15.855337 21.931286  
C 12.740340 15.044363 21.184069  
C 12.317483 13.863334 21.874475  
C 12.832087 12.703813 21.211494  
C 13.794262 11.971542 21.977207  
C 15.079118 12.050447 21.348955  
C 16.046959 12.789668 22.102608  
C 15.856040 15.188475 23.490538  
C 14.796711 15.933764 24.146366  
C 13.582148 15.844148 23.354401  
C 12.527016 15.107308 24.027315  
C 12.263765 13.878491 23.299154  
C 12.614622 12.689270 24.054564  
C 13.719166 12.010074 23.400154  
C 14.933427 12.021833 24.197954  
C 15.940588 12.821515 23.523594  
C 16.282467 14.029403 24.253508  
C 14.712585 15.933574 25.548645  
C 13.405741 15.915737 26.196541  
C 12.463293 15.110377 25.430273  
C 12.058586 13.905035 26.141340  
C 12.543482 12.712420 25.457840  
C 13.539580 11.997902 26.247770  
C 14.844070 12.055248 25.599869  
C 15.807268 12.831245 26.370100

C 16.183229 14.044790 25.654705  
C 15.725152 15.246150 26.339113  
C 13.329015 15.919552 27.595907  
C 12.292254 15.146292 28.266539  
C 11.991314 13.920140 27.543915  
C 12.365728 12.733477 28.300568  
C 13.460272 12.023734 27.649147  
C 14.679998 12.077096 28.442835  
C 15.712868 12.853824 27.770296  
C 16.025360 14.075726 28.500027  
C 15.632057 15.254226 27.740974  
C 14.548712 15.979191 28.391581  
C 12.209942 15.162316 29.669077  
C 11.813911 13.955664 30.377163  
C 12.287084 12.755371 29.702206  
C 13.288826 12.048501 30.491753  
C 14.595190 12.097814 29.847572  
C 15.558642 12.876271 30.614958  
C 15.937290 14.090977 29.902279  
C 15.465790 15.290362 30.579000  
C 14.461448 15.991417 29.793913  
C 13.150922 15.972437 30.435133  
C 11.706895 13.973845 31.784750  
C 12.060560 12.751625 32.594959  
C 13.199254 12.044976 31.898796  
C 14.446992 12.067821 32.742851  
C 15.494806 12.879477 32.022625

C 15.832462 14.126073 32.802528  
C 15.398152 15.319602 31.989679  
C 14.304240 16.086979 32.686428  
C 13.058109 16.011869 31.838055  
C 11.977919 15.239027 32.555443  
Os 14.227728 16.276379 34.766338  
Os 11.701972 15.359753 34.623001  
Os 13.697176 14.060499 33.133785  
Os 12.682016 16.264330 36.818565  
Os 15.879477 14.155790 34.890156  
Os 15.272417 15.512520 36.989723  
Os 13.530902 14.086549 35.788464  
Os 11.790283 12.664953 34.660973  
Os 11.159993 14.019983 36.742939  
Os 14.378206 11.922773 34.826591  
Os 13.374222 14.103415 38.195667  
Os 15.371569 12.812220 37.019928  
Os 12.826175 11.877783 36.868237

05H60C13Ir

H 12.806111 12.656546 20.111931  
H 15.137933 12.061646 20.251736  
H 16.518862 14.043035 20.315153  
H 15.015518 15.906986 20.214249  
H 12.753326 15.052411 20.095659  
C 16.388922 14.049317 21.398613  
C 15.975080 15.244041 22.073704



C 14.938390 15.860866 21.301949  
C 13.652651 15.836693 21.931835  
C 12.735508 15.032764 21.186962  
C 12.284120 13.863570 21.874548  
C 12.797056 12.705049 21.201908  
C 13.779791 11.995878 21.968254  
C 15.057491 12.116528 21.339022  
C 16.027113 12.846999 22.090298  
C 15.876262 15.238631 23.489462  
C 14.788859 15.948250 24.150982  
C 13.579669 15.825803 23.361141  
C 12.523188 15.095169 24.031357  
C 12.230000 13.873281 23.296232  
C 12.584227 12.679962 24.051908  
C 13.705738 12.029960 23.391165  
C 14.921906 12.069192 24.185043  
C 15.926242 12.871640 23.514029  
C 16.295490 14.066321 24.249321  
C 14.711056 15.943301 25.551609  
C 13.414168 15.866491 26.203018  
C 12.456952 15.092206 25.434065  
C 12.018172 13.889059 26.141991  
C 12.514162 12.696182 25.449638  
C 13.531887 12.001926 26.236883  
C 14.835257 12.092378 25.586849  
C 15.793794 12.869505 26.355696  
C 16.201883 14.076263 25.645491

C 15.758707 15.288242 26.341599  
C 13.342768 15.860502 27.609644  
C 12.290604 15.108418 28.271330  
C 11.943431 13.894247 27.532362  
C 12.335567 12.700207 28.290045  
C 13.450997 12.019420 27.631208  
C 14.672167 12.106337 28.425318  
C 15.703745 12.886377 27.756580  
C 16.057507 14.095006 28.490351  
C 15.682215 15.295651 27.730280  
C 14.561269 15.964920 28.394966  
C 12.208967 15.111186 29.668728  
C 11.746613 13.903255 30.373865  
C 12.247461 12.702291 29.683931  
C 13.279989 12.016480 30.469118  
C 14.591528 12.111821 29.823105  
C 15.541702 12.904112 30.585733  
C 15.986843 14.103251 29.887257  
C 15.556312 15.328379 30.586142  
C 14.488564 15.969479 29.793858  
C 13.196547 15.842378 30.429697  
C 11.630216 13.913721 31.759600  
C 12.094003 12.731627 32.572586  
C 13.193042 11.990873 31.865034  
C 14.441210 12.079336 32.710281  
C 15.484990 12.892800 31.996790  
C 15.826343 14.121060 32.782616

C 15.506129 15.358727 31.973307  
C 14.339481 16.009422 32.684265  
C 13.108624 15.869493 31.850695  
C 12.008248 15.144777 32.554001  
Ir 14.250313 16.308266 34.723259  
Ir 11.682871 15.356823 34.577896  
Ir 13.715980 14.008543 33.204514  
Ir 12.684583 16.234127 36.861458  
Ir 15.951918 14.161268 34.847073  
Ir 15.208548 15.476246 37.056351  
Ir 13.539880 14.094382 35.804779  
Ir 11.765677 12.618317 34.612011  
Ir 11.238109 14.016453 36.816418  
Ir 14.404530 11.900295 34.768299  
Ir 13.355878 14.138602 38.483170  
Ir 15.290067 12.882448 37.091736  
Ir 12.859076 11.982583 36.947052

05H60C13Pt

H 12.861342 12.659916 20.120096  
H 15.171780 12.004650 20.263023  
H 16.497627 14.000843 20.322437  
H 15.015387 15.885940 20.213272  
H 12.763119 15.058131 20.091133  
C 16.380711 14.011247 21.407326  
C 15.956488 15.203600 22.073116  
C 14.937822 15.847321 21.301004

C 13.652338 15.852199 21.931047  
C 12.745208 15.037893 21.182123  
C 12.322323 13.859520 21.873413  
C 12.839346 12.701874 21.210340  
C 13.804318 11.976072 21.976868  
C 15.087305 12.066442 21.349287  
C 16.048893 12.807895 22.104925  
C 15.851514 15.204270 23.495296  
C 14.787138 15.943260 24.151295  
C 13.576164 15.843687 23.355808  
C 12.523625 15.103889 24.028696  
C 12.264871 13.874859 23.298420  
C 12.619094 12.687350 24.054895  
C 13.726625 12.012412 23.399937  
C 14.940323 12.031103 24.199650  
C 15.943764 12.836931 23.526527  
C 16.279175 14.045766 24.258158  
C 14.701943 15.948302 25.550270  
C 13.393675 15.917073 26.198908  
C 12.453237 15.110188 25.428242  
C 12.052670 13.900122 26.140152  
C 12.544211 12.707790 25.454185  
C 13.545526 11.997560 26.244967  
C 14.852549 12.058719 25.597202  
C 15.811177 12.843578 26.369759  
C 16.183508 14.061501 25.655947  
C 15.719801 15.263794 26.342632

C 13.313135 15.922281 27.592159  
C 12.276727 15.139966 28.264606  
C 11.977270 13.911596 27.534107  
C 12.368037 12.724895 28.292400  
C 13.464924 12.014440 27.637875  
C 14.688454 12.074454 28.435888  
C 15.722254 12.858824 27.762964  
C 16.025066 14.085897 28.494997  
C 15.633039 15.272183 27.735723  
C 14.535509 15.982613 28.390408  
C 12.182582 15.157378 29.657043  
C 11.793436 13.934208 30.364136  
C 12.277121 12.729579 29.685387  
C 13.292543 12.024978 30.473911  
C 14.609221 12.076079 29.830246  
C 15.566924 12.875380 30.598343  
C 15.954122 14.098190 29.889275  
C 15.474649 15.304812 30.568218  
C 14.455136 16.006386 29.783209  
C 13.137768 15.962278 30.423389  
C 11.666590 13.947502 31.758595  
C 12.114426 12.767373 32.555759  
C 13.198603 12.001527 31.870975  
C 14.434949 12.115448 32.700539  
C 15.517189 12.866654 31.998116  
C 15.774722 14.126143 32.757610  
C 15.423273 15.342719 31.966581

C 14.280488 16.022358 32.648182  
C 13.039707 16.013798 31.817993  
C 12.016613 15.183461 32.522354  
Pt 14.269783 16.430490 34.649185  
Pt 11.566947 15.431479 34.499004  
Pt 13.682005 14.051949 33.331520  
Pt 12.657031 16.305950 36.920406  
Pt 16.052071 14.161978 34.781372  
Pt 15.309849 15.552303 37.087093  
Pt 13.532555 14.084407 35.835064  
Pt 11.679408 12.551125 34.540676  
Pt 11.118595 14.008728 36.856770  
Pt 14.453439 11.768400 34.714497  
Pt 13.374760 14.116902 38.491695  
Pt 15.412221 12.790134 37.127335  
Pt 12.822264 11.837058 36.984024

05H60C13Au

H 12.795506 12.600233 20.151846  
H 15.106955 11.921744 20.270491  
H 16.446520 13.922812 20.273943  
H 14.969903 15.833915 20.157917  
H 12.708387 15.006894 20.082497  
C 16.339897 13.951678 21.359695  
C 15.929848 15.157491 22.012035  
C 14.906056 15.802422 21.246836  
C 13.629592 15.829986 21.895868

C 12.712029 15.002940 21.173754  
C 12.295781 13.837168 21.891108  
C 12.795678 12.665570 21.241196  
C 13.763982 11.941755 22.005239  
C 15.037825 12.010085 21.356112  
C 16.016685 12.759954 22.083406  
C 15.847747 15.180648 23.435726  
C 14.801291 15.941990 24.094696  
C 13.576508 15.841885 23.320618  
C 12.532659 15.115146 24.021021  
C 12.260027 13.875873 23.316402  
C 12.617291 12.698554 24.085751  
C 13.710235 12.004702 23.428812  
C 14.935049 12.025074 24.209099  
C 15.931337 12.813921 23.506031  
C 16.279999 14.033246 24.212883  
C 14.736852 15.966682 25.496990  
C 13.440197 15.958527 26.166998  
C 12.487057 15.142954 25.424131  
C 12.088177 13.949089 26.158405  
C 12.564831 12.744605 25.487638  
C 13.569548 12.040943 26.276432  
C 14.865968 12.080516 25.609903  
C 15.840074 12.868888 26.354940  
C 16.202877 14.071530 25.614971  
C 15.756497 15.285138 26.286486  
C 13.383765 15.985214 27.567221  
C 12.360510 15.217044 28.263493  
C 12.032883 13.986930 27.556742  
C 12.419659 12.809466 28.327740  
C 13.507462 12.087590 27.674715  
C 14.737034 12.154239 28.452381  
C 15.768427 12.912393 27.754271  
C 16.084797 14.147388 28.460121  
C 15.689777 15.317467 27.687311  
C 14.615273 16.048140 28.345598  
C 12.299084 15.249555 29.666143  
C 11.907139 14.054503 30.399115  
C 12.343123 12.835506 29.722795  
C 13.370857 12.162551 30.515186  
C 14.668979 12.189655 29.852951  
C 15.614291 13.002353 30.603395  
C 16.024199 14.185997 29.863897  
C 15.553627 15.384287 30.538626  
C 14.555962 16.085281 29.748669  
C 13.267701 16.026453 30.419167  
C 11.821152 14.094775 31.800123  
C 12.185755 12.891044 32.582397  
C 13.299733 12.178442 31.916227  
C 14.517610 12.274343 32.707619  
C 15.550810 13.039546 32.013176  
C 15.914354 14.258522 32.716255  
C 15.496369 15.428665 31.954618  
C 14.424488 16.169212 32.609882

C 13.197346 16.063217 31.833384  
C 12.146375 15.315959 32.506393  
Au 14.472026 16.526903 34.625248  
Au 11.600368 15.773533 34.460930  
Au 13.522197 13.859724 34.090977  
Au 12.718565 16.329641 36.868996  
Au 16.225927 14.320765 34.741226  
Au 15.501717 15.655861 37.081970  
Au 11.227126 14.079189 36.679539  
Au 11.241864 12.245089 34.313164  
Au 10.282946 11.518897 36.665291  
Au 14.898004 11.548623 34.663761  
Au 13.512503 14.097921 38.295929  
Au 15.543098 12.755947 37.011139  
Au 12.996254 11.847614 36.732338

05H60C13Hg

H 12.814360 12.730942 20.034687  
H 15.092173 12.070458 20.116474  
H 16.368711 14.097604 20.167519  
H 14.913113 16.069138 20.138777  
H 12.700695 15.130678 20.050003  
C 16.308006 14.093507 21.257246  
C 15.868192 15.262507 21.943768  
C 14.864264 15.999872 21.226616  
C 13.579399 15.931852 21.883825  
C 12.690017 15.102328 21.141319

C 12.302977 13.897177 21.814178  
C 12.802657 12.750017 21.126217  
C 13.766938 11.991605 21.863228  
C 15.037901 12.111614 21.205959  
C 16.000271 12.869890 21.941336  
C 15.801615 15.234814 23.373423  
C 14.768541 15.979681 24.073505  
C 13.531648 15.890286 23.304024  
C 12.523191 15.093492 23.985802  
C 12.259703 13.878880 23.242746  
C 12.628696 12.680487 23.971308  
C 13.717782 12.001390 23.284094  
C 14.953798 12.036174 24.049484  
C 15.933241 12.863811 23.364065  
C 16.256123 14.069902 24.104496  
C 14.716021 15.948394 25.471825  
C 13.424696 15.885953 26.154331  
C 12.477388 15.079484 25.391884  
C 12.108295 13.853698 26.093273  
C 12.592230 12.682535 25.375959  
C 13.611778 11.971713 26.134668  
C 14.901530 12.041790 25.450195  
C 15.879110 12.820594 26.206821  
C 16.208326 14.061288 25.506674  
C 15.740969 15.236419 26.224453  
C 13.376288 15.863191 27.553612  
C 12.342900 15.076254 28.218790

C 12.059208 13.844320 27.494684  
 C 12.521976 12.683377 28.246765  
 C 13.573655 11.979985 27.536959  
 C 14.821034 11.989766 28.284304  
 C 15.846884 12.796182 27.599108  
 C 16.137661 14.026871 28.341465  
 C 15.684145 15.207521 27.627613  
 C 14.606663 15.871419 28.337442  
 C 12.241527 15.098802 29.610506  
 C 11.919863 13.865707 30.324484  
 C 12.498945 12.708175 29.665930  
 C 13.561006 12.084362 30.447262  
 C 14.816178 11.956629 29.678705  
 C 15.891376 12.680833 30.346951  
 C 16.124908 13.985251 29.742403  
 C 15.499485 15.063872 30.529116  
 C 14.532373 15.831104 29.752041  
 C 13.220165 15.859912 30.376070  
 C 11.838916 13.892432 31.735312  
 C 12.476784 12.904548 32.534653  
 C 13.554483 12.256971 31.883247

C 14.855261 12.313452 32.571037  
 C 15.965682 12.590364 31.723640  
 C 15.706582 13.679476 32.569801  
 C 15.289092 14.932982 31.957367  
 C 14.253010 15.644747 32.615070  
 C 13.123127 15.867859 31.787046  
 C 12.061444 15.135406 32.452679  
 Hg 14.662602 17.902798 34.911087  
 Hg 9.622059 16.540676 34.795322  
 Hg 12.994292 14.426729 34.348198  
 Hg 12.093851 17.137194 37.129429  
 Hg 16.620569 14.082296 34.804043  
 Hg 16.192650 16.070101 37.277252  
 Hg 13.588819 14.013046 37.014290  
 Hg 10.360888 11.569401 34.854713  
 Hg 10.164897 14.108864 37.198917  
 Hg 14.827160 11.267812 34.719147  
 Hg 12.595507 14.716385 39.817581  
 Hg 15.961082 12.211298 37.813431  
 Hg 12.770646 10.841663 37.098343

We also provided the atomic positions (xyz coordinates) of the  $\text{TM}_{13}$  nanoclusters composed by all *3d*, *4d*, and *5d* elements obtained by DFT-PBE-D3 as implemented in VASP.

13Sc  
 Sc 15.575130 14.512575 45.214104  
 Sc 15.035377 17.267689 46.659462

Sc 17.891581 15.929853 46.825279  
 Sc 13.883965 16.750658 43.764328  
 Sc 18.506348 14.587898 44.034073

Sc 16.028294 15.096132 42.142029  
Sc 16.829241 17.070650 44.258900  
Sc 18.623104 16.873602 41.858337  
Sc 15.766900 18.211447 41.692535  
Sc 15.152133 19.553391 44.483727  
Sc 17.630188 19.045158 46.375782  
Sc 19.774517 17.390633 44.753479  
Sc 18.083351 19.628723 43.303707

### 13Ti

Ti 1.765024 0.862929 17.119574  
Ti 1.334839 3.324299 18.396711  
Ti 3.862261 2.136650 18.479761  
Ti 0.246180 2.863374 15.864527  
Ti 4.336623 0.941865 15.999340  
Ti 2.102481 1.390585 14.383582  
Ti 2.829241 3.070650 16.258900  
Ti 4.323642 2.817001 14.121089  
Ti 1.796219 4.004642 14.038050  
Ti 1.321857 5.199425 16.518469  
Ti 3.556000 4.750716 18.134228  
Ti 5.412300 3.277925 16.653284  
Ti 3.893456 5.278360 15.398226

### 13V

V 1.797465 1.219423 17.176270  
V 1.353187 3.118291 18.318169

V 3.754744 2.291046 18.445034  
V 0.349222 2.976837 15.984899  
V 4.350247 1.292660 16.081087  
V 2.112281 1.742626 14.463104  
V 2.829241 3.070650 16.258900  
V 4.305294 3.023009 14.199640  
V 1.903735 3.850245 14.072777  
V 1.308233 4.848630 16.436722  
V 3.546199 4.398674 18.054707  
V 5.309256 3.164452 16.532911  
V 3.861016 4.921877 15.341541

### 13Cr

Cr 1.741287 0.820800 17.136179  
Cr 1.772523 3.019865 18.404276  
Cr 3.870344 2.059238 18.474333  
Cr 0.583408 2.519146 15.644621  
Cr 3.854527 0.908670 16.210163  
Cr 2.116882 1.320255 14.403274  
Cr 2.829241 3.070650 16.258900  
Cr 3.885958 3.121435 14.113536  
Cr 1.788136 4.082050 14.043477  
Cr 1.803953 5.232620 16.307648  
Cr 3.541599 4.821035 18.114527  
Cr 5.075071 3.622154 16.873192  
Cr 3.917192 5.320499 15.381630

13Mn

Mn 1.800024 0.909570 17.131046  
Mn 1.423071 3.136215 18.360668  
Mn 3.774656 2.100548 18.415047  
Mn 0.509062 2.909231 16.029028  
Mn 4.181060 0.933553 16.161348  
Mn 2.275583 1.499033 14.619730  
Mn 2.829241 3.070650 16.258900  
Mn 4.235409 3.005076 14.157143  
Mn 1.883823 4.040740 14.102762  
Mn 1.477419 5.207747 16.356464  
Mn 3.382898 4.642255 17.898069  
Mn 5.149417 3.232060 16.488781  
Mn 3.858456 5.231731 15.386763

13Fe

Fe 1.876347 1.064895 17.036047  
Fe 1.571284 3.199188 18.220362  
Fe 3.737084 2.112564 18.275211  
Fe 0.548517 2.911286 15.902571  
Fe 4.152136 1.066619 16.083153  
Fe 2.249460 1.494137 14.639601  
Fe 2.829241 3.070650 16.258900  
Fe 4.087196 2.942112 14.297450  
Fe 1.921395 4.028726 14.242599  
Fe 1.506344 5.074670 16.434656  
Fe 3.409019 4.647153 17.878208

Fe 5.109963 3.230016 16.615229

Fe 3.782134 5.076404 15.481752

13Co

Co 1.918995 1.100056 17.019714  
Co 1.503674 3.216987 18.136415  
Co 3.688792 2.170841 18.192108  
Co 0.560357 2.831024 15.939013  
Co 4.084268 1.152979 16.071606  
Co 2.173408 1.550959 14.660371  
Co 2.829241 3.070650 16.258900  
Co 4.154806 2.924304 14.381393  
Co 1.969690 3.970449 14.325700  
Co 1.574212 4.988312 16.446205  
Co 3.485072 4.590330 17.857441  
Co 5.098124 3.310266 16.578796  
Co 3.739486 5.041245 15.498095

13Ni

Ni 1.871728 1.078020 17.002729  
Ni 1.475565 3.218178 18.122265  
Ni 3.701644 2.172476 18.197889  
Ni 0.533703 2.825935 15.952356  
Ni 4.126512 1.142426 16.077034  
Ni 2.167469 1.534289 14.669310  
Ni 2.829241 3.070650 16.258900  
Ni 4.182916 2.923113 14.395545



Ni 1.956835 3.968815 14.319919  
Ni 1.531968 4.998876 16.440767  
Ni 3.491010 4.607001 17.848501  
Ni 5.124776 3.315356 16.565454  
Ni 3.786753 5.063269 15.515081

### 13Cu

Cu 1.845062 1.028949 17.051310  
Cu 1.449359 3.232922 18.216459  
Cu 3.733073 2.159025 18.287525  
Cu 0.464358 2.820082 15.929809  
Cu 4.158824 1.083180 16.044945  
Cu 2.138457 1.492079 14.587105  
Cu 2.829241 3.070650 16.258900  
Cu 4.209120 2.908378 14.301352  
Cu 1.925408 3.982266 14.230286  
Cu 1.499657 5.058119 16.472857  
Cu 3.520023 4.649210 17.930706  
Cu 5.194122 3.321218 16.587992  
Cu 3.813419 5.112350 15.466497

### 13Zn

Zn 15.593801 14.543217 17.235647  
Zn 15.129402 17.280365 18.694336  
Zn 17.947754 15.936098 18.756392  
Zn 13.915940 16.751108 15.859512  
Zn 18.484030 14.607304 16.008289

Zn 15.989948 15.122842 14.190655  
Zn 16.829241 17.070650 16.258900  
Zn 18.529078 16.860935 13.823463  
Zn 15.710727 18.205193 13.761418  
Zn 15.174452 19.533987 16.509521  
Zn 17.668531 19.018448 18.327156  
Zn 19.742540 17.390192 16.658298  
Zn 18.064678 19.598083 15.282152

### 13Y

Y 15.403497 14.263514 45.356041  
Y 14.871913 17.237598 46.898026  
Y 18.022963 15.793410 47.100189  
Y 13.556325 16.733269 43.703468  
Y 18.613562 14.370529 44.093498  
Y 15.849266 14.941632 41.982243  
Y 16.829241 17.070650 44.258900  
Y 18.786568 16.903690 41.619789  
Y 15.635517 18.347879 41.417610  
Y 15.044919 19.770771 44.424316  
Y 17.809214 19.199657 46.535568  
Y 20.102154 17.408031 44.814342  
Y 18.254984 19.877775 43.161766

### 13Zr

Zr 15.728557 14.604703 17.233170  
Zr 15.284309 17.238579 18.669487

Zr 17.980452 16.051994 18.681494  
Zr 13.984066 16.765934 15.980330  
Zr 18.476669 14.741290 15.983276  
Zr 15.958402 15.122153 14.343241  
Zr 16.829241 17.070650 16.258900  
Zr 18.374170 16.902710 13.848315  
Zr 15.678026 18.089306 13.836315  
Zr 15.181812 19.400000 16.534533  
Zr 17.700077 19.019136 18.174570  
Zr 19.674414 17.375355 16.537481  
Zr 17.929922 19.536587 15.284631

13Nb

Nb 1.951703 0.765818 17.174316  
Nb 1.501656 3.412740 18.456398  
Nb 3.947765 2.128620 18.654123  
Nb 0.315719 2.793139 15.593289  
Nb 4.200588 0.732613 16.112698  
Nb 2.055660 1.221163 14.294991  
Nb 2.829241 3.070650 16.258900  
Nb 4.156823 2.728560 14.061413  
Nb 1.710714 4.012680 13.863686  
Nb 1.457893 5.408677 16.405111  
Nb 3.602821 4.920127 18.222820  
Nb 5.342762 3.348150 16.924519  
Nb 3.706778 5.375472 15.343493

13Mo

Mo 1.583516 1.210849 17.494034  
Mo 1.296821 3.270378 18.459106  
Mo 3.826020 2.004573 18.513563  
Mo 0.187053 2.738226 15.892720  
Mo 4.694552 1.315612 16.118773  
Mo 1.988435 1.860961 14.164494  
Mo 2.829241 3.070650 16.258909  
Mo 4.361660 2.870913 14.058704  
Mo 1.832460 4.136727 14.004246  
Mo 0.963928 4.825689 16.399036  
Mo 3.670046 4.280338 18.353315  
Mo 5.471427 3.403065 16.625090  
Mo 4.074965 4.930442 15.023777

13Tc

Tc 1.791614 0.852669 16.933201  
Tc 1.298900 3.177340 18.205233  
Tc 3.838752 2.000810 18.245119  
Tc 0.361833 2.653238 15.875657  
Tc 4.112115 0.916603 15.919746  
Tc 2.054518 1.357009 14.515673  
Tc 2.829241 3.070650 16.258900  
Tc 4.359580 2.963951 14.312567  
Tc 1.819728 4.140491 14.272692  
Tc 1.546365 5.224698 16.598064  
Tc 3.603963 4.784293 18.002129

Tc 5.296647 3.488060 16.642153

Tc 3.866866 5.288621 15.584609

### 13Ru

Ru 1.811886 0.956312 17.077316

Ru 1.400539 3.236410 18.285515

Ru 3.765271 2.126942 18.358717

Ru 0.381571 2.809964 15.917232

Ru 4.207606 1.014882 16.036034

Ru 2.116455 1.437094 14.527168

Ru 2.829241 3.070650 16.258900

Ru 4.257939 2.904890 14.232295

Ru 1.893209 4.014359 14.159094

Ru 1.450874 5.126419 16.481777

Ru 3.542027 4.704196 17.990631

Ru 5.276908 3.331325 16.600578

Ru 3.846593 5.184979 15.440492

### 13Rh

Rh 1.771610 0.909769 17.095564

Rh 1.354326 3.241042 18.328289

Rh 3.801915 2.109228 18.407522

Rh 0.345107 2.808021 15.913864

Rh 4.252262 0.970198 16.034460

Rh 2.082402 1.398604 14.488663

Rh 2.829241 3.070650 16.258900

Rh 4.304154 2.900248 14.189520

Rh 1.856564 4.032060 14.110287

Rh 1.406217 5.171092 16.483337

Rh 3.576079 4.742685 18.029146

Rh 5.313374 3.333280 16.603947

Rh 3.886868 5.231532 15.422245

### 13Pd

Pd 1.803586 0.861492 17.099508

Pd 1.371177 3.271197 18.373894

Pd 3.851315 2.050908 18.535374

Pd 0.293648 2.819248 15.872496

Pd 4.317310 0.835433 16.023428

Pd 2.060899 1.299001 14.377348

Pd 2.829241 3.070650 16.258900

Pd 4.287302 2.870103 14.143917

Pd 1.807166 4.090392 13.982433

Pd 1.341170 5.305858 16.494381

Pd 3.597580 4.842299 18.140451

Pd 5.364833 3.322043 16.645304

Pd 3.854893 5.279796 15.418302

### 13Pd

Pd 1.803586 0.861492 17.099508

Pd 1.371177 3.271197 18.373894

Pd 3.851315 2.050908 18.535374

Pd 0.293648 2.819248 15.872496

Pd 4.317310 0.835433 16.023428

Pd 2.060899 1.299001 14.377348  
Pd 2.829241 3.070650 16.258900  
Pd 4.287302 2.870103 14.143917  
Pd 1.807166 4.090392 13.982433  
Pd 1.341170 5.305858 16.494381  
Pd 3.597580 4.842299 18.140451  
Pd 5.364833 3.322043 16.645304  
Pd 3.854893 5.279796 15.418302

13Lu

Lu 15.510445 14.337078 45.324982  
Lu 15.030842 17.306873 46.901695  
Lu 18.016035 15.890838 46.994453  
Lu 13.667156 16.724936 43.808018  
Lu 18.611336 14.411219 43.954460  
Lu 15.936624 14.994143 41.983967  
Lu 16.829241 17.070650 44.258900  
Lu 18.627638 16.834417 41.616100  
Lu 15.642446 18.250452 41.523357  
Lu 15.047146 19.730072 44.563351  
Lu 17.721855 19.147156 46.533844  
Lu 19.991314 17.416355 44.709793  
Lu 18.148037 19.804214 43.192825

13Hf

Hf 1.751820 0.617136 17.192984  
Hf 1.185262 3.250770 18.619883

Hf 3.910858 1.998369 18.638086  
Hf 0.039815 2.795331 15.833909  
Hf 4.426107 0.747565 16.029009  
Hf 1.961375 1.191103 14.309643  
Hf 2.829241 3.070650 16.258900  
Hf 4.473218 2.890521 13.897927  
Hf 1.747621 4.142921 13.879721  
Hf 1.232373 5.393724 16.488791  
Hf 3.697105 4.950186 18.208168  
Hf 5.618666 3.345958 16.683899  
Hf 3.906662 5.524164 15.324827

13Ta

Ta 1.748854 0.791862 17.153992  
Ta 1.306332 3.218093 18.444241  
Ta 3.853144 2.055936 18.509651  
Ta 0.196253 2.784715 15.887862  
Ta 4.341886 0.874016 16.023157  
Ta 2.055490 1.333501 14.377001  
Ta 2.829241 3.070650 16.258900  
Ta 4.352149 2.923197 14.073568  
Ta 1.805335 4.085364 14.008149  
Ta 1.316593 5.267274 16.494654  
Ta 3.602988 4.807798 18.140808  
Ta 5.462227 3.356585 16.629948  
Ta 3.909626 5.349430 15.363821

13W

W 1.762288 0.841786 16.598831  
W 1.183877 3.676906 18.186169  
W 4.237682 2.255341 18.300665  
W 0.143515 2.789663 15.915588  
W 4.347805 0.829133 16.072472  
W 2.138380 1.444422 14.254507  
W 2.829241 3.070650 16.258900  
W 4.474602 2.464385 14.331641  
W 1.420798 3.885959 14.217146  
W 1.310675 5.312156 16.445337  
W 3.520099 4.696879 18.263294  
W 5.514964 3.351628 16.602222  
W 3.896192 5.299502 15.918980

13Re

Re 1.756664 0.915488 17.095860  
Re 1.336358 3.193921 18.321396  
Re 3.773787 2.093090 18.398769  
Re 0.317607 2.780054 15.940689  
Re 4.248688 0.984446 16.015120  
Re 2.100279 1.410791 14.487065  
Re 2.829241 3.070650 16.258900  
Re 4.322123 2.947370 14.196413  
Re 1.884693 4.048210 14.119041  
Re 1.409792 5.156844 16.502693  
Re 3.558201 4.730508 18.030745

Re 5.340874 3.361248 16.577120

Re 3.901817 5.225812 15.421948

13Os

Os 1.800199 0.920096 16.980904  
Os 1.373419 3.175813 18.276991  
Os 3.781193 2.047631 18.352873  
Os 0.376240 2.791760 15.932446  
Os 4.217427 1.027999 15.934946  
Os 2.132747 1.466865 14.485901  
Os 2.829241 3.070650 16.258900  
Os 4.285060 2.965487 14.240810  
Os 1.877287 4.093660 14.164935  
Os 1.441054 5.113301 16.582863  
Os 3.525734 4.674435 18.031910  
Os 5.282241 3.349530 16.585365  
Os 3.858281 5.221193 15.536904

13Ir

Ir 1.744937 0.913348 17.080730  
Ir 1.400554 3.253254 18.320910  
Ir 3.779905 2.121840 18.444227  
Ir 0.319047 2.763246 15.928205  
Ir 4.247059 0.950156 15.988931  
Ir 2.130096 1.426235 14.488509  
Ir 2.829241 3.070650 16.258909  
Ir 4.257926 2.888046 14.196890

Ir 1.878575 4.019460 14.073582  
Ir 1.411421 5.191145 16.528879  
Ir 3.528386 4.715064 18.029301  
Ir 5.339433 3.378045 16.589596  
Ir 3.913543 5.227952 15.437078

13Pt

Pt 1.742479 0.799540 17.150558  
Pt 1.284456 3.250105 18.431524  
Pt 3.778439 2.074798 18.430620  
Pt 0.292603 2.806185 15.937366  
Pt 4.302339 0.856200 16.012783  
Pt 2.112817 1.361771 14.476892  
Pt 2.829241 3.070650 16.258900  
Pt 4.374023 2.891195 14.086286  
Pt 1.880042 4.066491 14.087190  
Pt 1.356142 5.285101 16.505028  
Pt 3.545665 4.779529 18.040909  
Pt 5.365877 3.335114 16.580444  
Pt 3.916001 5.341750 15.367252

13Au

Au 1.693597 0.714340 17.175465  
Au 1.236251 3.258530 18.518452  
Au 3.873209 2.019047 18.601860  
Au 0.098996 2.781455 15.877550

Au 4.364552 0.776790 16.011904  
Au 2.031769 1.248072 14.329682  
Au 2.829241 3.070650 16.258900  
Au 4.422229 2.882761 13.999358  
Au 1.785269 4.122241 13.915949  
Au 1.293929 5.364500 16.505907  
Au 3.626710 4.893217 18.188116  
Au 5.559482 3.359836 16.640261  
Au 3.964883 5.426950 15.342336

13Hg

Hg 15.365132 13.997663 45.391815  
Hg 14.725081 17.266541 47.137497  
Hg 18.140669 15.706888 47.287777  
Hg 13.322480 16.658237 43.717514  
Hg 18.851700 14.136105 43.947258  
Hg 15.867680 14.722689 41.741047  
Hg 16.829241 17.070650 44.258900  
Hg 18.933397 16.874748 41.380310  
Hg 15.517812 18.434402 41.230034  
Hg 14.806781 20.005196 44.570549  
Hg 17.790800 19.418602 46.776764  
Hg 20.335999 17.483063 44.800285  
Hg 18.293346 20.143627 43.125992

Here, we provided the atomic positions (xyz coordinates) of the five-layered hydrogen-

terminated fragment for the (3,3) armchair CNT and tree-layered hydrogen terminated fragment for the (5,0) zigzag CNT, obtained by DFT-PBE-D3.

|                                 |                                 |
|---------------------------------|---------------------------------|
| 6H60C                           | C 15.599827 15.340401 25.510559 |
| H 13.005339 16.468914 22.144638 | C 11.875553 14.003577 26.740343 |
| H 11.389912 14.545991 22.147240 | C 12.376068 12.634940 26.741928 |
| H 15.792711 15.991688 22.150881 | C 15.060675 12.159607 26.740080 |
| H 16.652323 13.630962 22.146757 | C 15.998642 13.274532 26.738808 |
| H 14.823399 11.453792 22.150383 | C 15.064177 15.835799 26.740396 |
| H 12.349002 11.882095 22.153847 | C 13.629359 16.089897 26.739447 |
| C 16.193329 14.080676 23.027973 | C 12.951795 12.180631 27.966057 |
| C 15.731491 15.350370 23.030842 | C 14.364069 11.930295 27.965181 |
| C 12.839761 15.852162 23.028719 | C 16.104254 14.000517 27.963556 |
| C 11.969955 14.817511 23.029978 | C 15.611677 15.347245 27.965010 |
| C 12.968205 12.056302 23.034451 | C 12.947358 15.821362 27.964371 |
| C 14.299779 11.824984 23.032225 | C 12.025287 14.723168 27.964737 |
| C 15.018500 15.783732 24.246199 | C 15.041893 12.206817 29.215240 |
| C 13.654435 16.024345 24.245087 | C 15.951303 13.283712 29.214649 |
| C 11.946064 13.986931 24.246315 | C 15.031120 15.796709 29.214043 |
| C 12.415905 12.683487 24.247908 | C 13.644578 16.045212 29.214937 |
| C 15.035376 12.228824 24.244171 | C 11.929665 13.998074 29.215166 |
| C 15.928272 13.287804 24.242260 | C 12.408370 12.673538 29.215616 |
| C 12.957834 15.803468 25.509703 | C 16.087337 14.000588 30.467669 |
| C 12.038196 14.713866 25.509796 | C 15.603815 15.343401 30.467100 |
| C 12.959207 12.195413 25.512350 | C 12.954837 15.810571 30.467896 |
| C 14.363142 11.946157 25.510588 | C 12.031543 14.722116 30.468355 |
| C 16.085907 13.999823 25.508753 | C 12.956669 12.194352 30.468189 |

C 14.361127 11.940164 30.467693  
C 15.067332 15.839093 31.698166  
C 13.630624 16.091452 31.699623  
C 11.869676 14.010068 31.699455  
C 12.371658 12.639624 31.698547  
C 15.057214 12.156637 31.698589  
C 15.994059 13.273767 31.699036  
C 12.892202 15.867536 32.940723  
C 11.966765 14.778514 32.941593  
C 12.934795 12.111907 32.938885  
C 14.342317 11.854381 32.939575  
C 16.168402 14.025556 32.939404  
C 15.686209 15.372191 32.939556  
C 11.875175 13.888199 34.035908  
C 12.279177 12.712198 34.041695  
C 15.156781 12.223863 34.033085  
C 15.982123 13.154372 34.041920  
C 14.956687 15.889014 34.032753  
C 13.739760 16.145103 34.043400

60C5H

H 12.310753 15.216245 34.235756  
H 14.617910 15.921550 34.251255  
H 16.042645 13.973272 34.250999  
H 12.319292 12.803721 34.231586  
H 14.623028 12.023699 34.240917  
C 15.478099 13.558344 21.893448

C 15.175496 14.847034 22.392265  
C 14.046200 15.545435 21.896118  
C 13.199313 16.303982 22.685192  
C 12.608005 15.336711 21.793839  
C 12.134204 14.102478 22.428019  
C 12.521804 12.930779 21.797764  
C 13.499383 12.176304 22.423195  
C 14.824375 12.250908 21.803181  
C 15.923927 12.516928 22.688269  
C 15.491633 15.076426 23.836731  
C 14.630762 15.969997 24.631014  
C 13.292558 16.202772 24.054131  
C 12.300065 15.321989 24.676243  
C 12.064726 14.108786 23.877319  
C 12.485250 12.900082 24.579567  
C 13.484674 12.103690 23.873343  
C 14.713662 11.970195 24.677038  
C 15.853385 12.638488 24.059145  
C 16.063871 13.975745 24.634863  
C 14.660942 15.953850 26.042051  
C 13.386240 16.002579 26.779249  
C 12.340458 15.254821 26.067265  
C 11.995140 14.025207 26.756983  
C 12.426389 12.861516 26.005743  
C 13.386741 12.080120 26.763065  
C 14.660229 12.033463 26.071146  
C 15.695978 12.787191 26.782944



|                                 |                                 |
|---------------------------------|---------------------------------|
| C 16.056091 14.009954 26.044907 | C 15.636569 12.801427 31.030224 |
| C 15.648325 15.190102 26.771723 | C 16.062782 13.993776 30.311352 |
| C 13.383908 15.984332 28.174984 | C 15.629988 15.171711 31.035923 |
| C 12.361591 15.215853 28.889214 | C 14.646942 15.953147 30.310951 |
| C 11.968170 14.014302 28.163143 | C 13.383201 15.922933 31.027561 |
| C 12.354455 12.814482 28.888941 | C 11.944144 14.009057 32.437901 |
| C 13.368954 12.062208 28.167791 | C 12.379038 12.841723 33.142563 |
| C 14.633123 12.058653 28.895592 | C 13.357722 12.063305 32.445175 |
| C 15.681181 12.788455 28.179443 | C 14.604209 12.094775 33.152267 |
| C 16.048519 13.999038 28.907261 | C 15.650963 12.780825 32.451439 |
| C 15.660821 15.197703 28.181553 | C 15.984765 13.977924 33.161182 |
| C 14.647176 15.943282 28.904840 | C 15.647043 15.182057 32.463184 |
| C 12.342568 15.220369 30.293888 | C 14.607184 15.871402 33.161205 |
| C 11.980034 14.011271 31.014507 | C 13.367624 15.941788 32.452259 |
| C 12.331177 12.799366 30.292475 | C 12.372366 15.178153 33.147057 |
| C 13.370694 12.089222 31.020576 |                                 |
| C 14.631533 12.043091 30.299273 |                                 |

The lowest energy configurations obtained from DFT-PBE-D3 for the (3,3) armchair fragment and (5,0) zigzag fragment adhered to *3d*, *4d*, and *5d* TM<sub>13</sub> nanoclusters are provided below.

|                                 |                                 |
|---------------------------------|---------------------------------|
| 06H60C13Sc                      | H 12.718701 11.827477 20.688486 |
| H 13.404922 16.224083 20.537163 | C 16.432673 13.930167 21.774981 |
| H 11.800575 14.320746 20.513882 | C 15.968545 15.201973 21.681534 |
| H 16.031441 15.760777 20.746988 | C 13.132393 15.702011 21.455204 |
| H 16.882584 13.427933 20.917578 | C 12.257874 14.664231 21.442688 |
| H 15.161794 11.395823 20.883469 | C 13.243321 11.964307 21.634888 |

C 14.576341 11.728578 21.741467  
C 15.220240 15.727325 22.826725  
C 13.829075 15.975468 22.715240  
C 12.093048 13.911301 22.688816  
C 12.578671 12.582585 22.784143  
C 15.230083 12.115325 22.994278  
C 16.143475 13.198626 23.010616  
C 13.044164 15.813803 23.905655  
C 12.103104 14.691582 23.892099  
C 13.032941 12.148014 24.072840  
C 14.468199 11.890997 24.188932  
C 16.211229 13.966855 24.219372  
C 15.708859 15.337764 24.118050  
C 11.906198 14.028364 25.135929  
C 12.399284 12.674959 25.232174  
C 15.056722 12.204232 25.446785  
C 15.984572 13.311474 25.462231  
C 15.060421 15.849030 25.276031  
C 13.642813 16.101849 25.163389  
C 12.876576 12.274336 26.531958  
C 14.277385 12.027106 26.646992  
C 16.003719 14.089121 26.675964  
C 15.516607 15.426553 26.576157  
C 12.878567 15.888348 26.368826  
C 11.965365 14.794623 26.355213  
C 14.880833 12.312158 27.922541  
C 15.810933 13.423218 27.936493

C 14.889058 15.973636 27.747458  
C 13.466804 16.218754 27.640621  
C 11.725039 14.133990 27.612503  
C 12.214131 12.775098 27.705172  
C 15.864039 14.198542 29.132715  
C 15.371399 15.575145 29.027521  
C 12.692837 16.030622 28.823618  
C 11.757671 14.909733 28.809002  
C 12.672621 12.347148 28.985390  
C 14.112857 12.103270 29.106653  
C 14.705417 16.080727 30.184616  
C 13.299635 16.301687 30.093964  
C 11.584591 14.245104 30.066931  
C 12.043228 12.897396 30.143705  
C 14.707410 12.432292 30.366709  
C 15.630543 13.535354 30.379730  
C 12.523751 16.139355 31.338406  
C 11.590181 15.018949 31.323807  
C 12.495973 12.475419 31.474970  
C 13.930634 12.249454 31.595436  
C 15.659858 14.312452 31.619289  
C 15.185382 15.686643 31.513817  
C 11.161839 14.287735 32.512764  
C 11.684367 12.903165 32.608692  
C 14.628633 12.434524 32.892776  
C 15.582243 13.574471 32.905815  
C 14.609171 16.391382 32.650429

C 13.155829 16.668261 32.544113  
Sc 13.442123 14.400270 32.677288  
Sc 14.638176 13.375287 35.141457  
Sc 16.665163 11.700760 33.539021  
Sc 11.079565 13.683708 34.514130  
Sc 16.347002 15.445599 33.691742  
Sc 13.717510 16.830051 34.551464  
Sc 12.909974 11.347131 33.645512  
Sc 14.985440 13.054771 38.196114  
Sc 15.697296 15.732637 36.843948  
Sc 12.758085 14.929563 37.014076  
Sc 12.488358 11.899406 36.801605  
Sc 15.398412 10.702914 36.191353  
Sc 17.393505 13.084475 36.219910

06H60C13Ti

H 13.103240 16.369827 20.597700  
H 11.540506 14.422771 20.584311  
H 15.777281 15.950109 20.666733  
H 16.674902 13.623173 20.720215  
H 14.984760 11.500424 20.717207  
H 12.521091 11.888316 20.649002  
C 16.243593 14.087846 21.607916  
C 15.755806 15.352299 21.578817  
C 12.896718 15.797071 21.502764  
C 12.048982 14.740406 21.495613  
C 13.095591 12.035100 21.564436

C 14.434354 11.823324 21.601877  
C 15.045105 15.820421 22.774366  
C 13.653410 16.034372 22.738585  
C 11.972201 13.940845 22.725023  
C 12.481539 12.628818 22.757467  
C 15.134884 12.214501 22.829834  
C 16.014969 13.314927 22.833279  
C 12.929429 15.822332 23.965370  
C 12.014205 14.685755 23.957916  
C 12.995975 12.163064 24.020041  
C 14.433996 11.940862 24.057835  
C 16.131380 14.051500 24.066631  
C 15.605297 15.408236 24.035692  
C 11.872150 13.985762 25.186405  
C 12.394563 12.634392 25.220795  
C 15.076758 12.224473 25.292681  
C 15.987113 13.352983 25.297264  
C 15.010080 15.882459 25.238609  
C 13.577610 16.099115 25.199932  
C 12.943086 12.211314 26.480434  
C 14.351565 12.000746 26.513189  
C 16.040766 14.095117 26.525116  
C 15.534571 15.426263 26.497803  
C 12.879959 15.826375 26.428940  
C 11.983981 14.717079 26.421635  
C 14.998294 12.276677 27.771276  
C 15.899629 13.390954 27.776657

C 14.949652 15.916866 27.725096  
C 13.527393 16.123043 27.683083  
C 11.824160 14.014645 27.670528  
C 12.328570 12.668358 27.707573  
C 16.018826 14.125824 28.999130  
C 15.506377 15.502001 28.976440  
C 12.810053 15.893269 28.897524  
C 11.890851 14.757083 28.890326  
C 12.842566 12.201070 28.958178  
C 14.294993 11.993055 28.986317  
C 14.887584 15.959963 30.179163  
C 13.470196 16.158207 30.132673  
C 11.766751 14.046475 30.119934  
C 12.257734 12.701683 30.160938  
C 14.944787 12.303534 30.207754  
C 15.843535 13.414674 30.213737  
C 12.765158 15.899568 31.384352  
C 11.863914 14.782338 31.377693  
C 12.813307 12.300693 31.462481  
C 14.236302 12.075777 31.474348  
C 15.906890 14.145821 31.485586  
C 15.388973 15.490783 31.480968  
C 11.564843 14.075639 32.596752  
C 12.127615 12.726992 32.697666  
C 14.975994 12.178231 32.718632  
C 15.956028 13.392773 32.725033  
C 14.820894 16.062973 32.716999

C 13.385818 16.333513 32.610786  
Ti 13.866014 14.079202 32.650356  
Ti 14.184606 13.807074 35.537949  
Ti 16.148584 12.225950 34.401169  
Ti 11.659430 13.766674 34.556313  
Ti 16.156609 15.076276 34.149517  
Ti 13.699043 16.290762 34.571793  
Ti 13.364341 11.620635 34.133415  
Ti 14.381722 13.634187 38.128929  
Ti 15.171652 15.855297 36.790771  
Ti 12.534009 15.134953 37.016312  
Ti 12.383271 12.403884 36.770744  
Ti 14.838443 11.467999 36.570278  
Ti 16.603172 13.652250 36.583401

06H60C13V

H 13.219901 16.418728 20.614498  
H 11.617649 14.502551 20.567825  
H 15.884166 15.935595 20.714399  
H 16.730030 13.587102 20.767893  
H 14.984741 11.478777 20.736393  
H 12.528774 11.923811 20.642839  
C 16.293940 14.057635 21.649885  
C 15.834593 15.331690 21.621239  
C 12.990153 15.843550 21.512266  
C 12.121593 14.804184 21.486759  
C 13.100151 12.065365 21.561113

C 14.432813 11.824036 21.611471  
C 15.118324 15.810344 22.811531  
C 13.734997 16.057232 22.758986  
C 12.012786 14.001080 22.711796  
C 12.489984 12.678702 22.747187  
C 15.128429 12.202209 22.848213  
C 16.026873 13.284112 22.868187  
C 12.988938 15.855734 23.977066  
C 12.054391 14.740693 23.950205  
C 12.977490 12.194615 24.015121  
C 14.409586 11.936512 24.069708  
C 16.144604 14.011979 24.108757  
C 15.650805 15.379889 24.079830  
C 11.878479 14.038470 25.173977  
C 12.372963 12.674366 25.208790  
C 15.045445 12.199545 25.313345  
C 15.975811 13.312197 25.334507  
C 15.051364 15.864694 25.276445  
C 13.623070 16.118149 25.222706  
C 12.900204 12.235935 26.472301  
C 14.301529 11.990437 26.525135  
C 16.030575 14.051331 26.565880  
C 15.546922 15.389959 26.539228  
C 12.903393 15.850489 26.439051  
C 11.989337 14.761250 26.411499  
C 14.944145 12.247396 27.793276  
C 15.864091 13.344425 27.813797

C 14.951818 15.881253 27.764116  
C 13.538249 16.123085 27.711306  
C 11.801800 14.054814 27.658842  
C 12.288747 12.706325 27.694221  
C 15.984691 14.068924 29.043571  
C 15.486442 15.453115 29.021887  
C 12.794046 15.913116 28.915003  
C 11.846046 14.792290 28.882708  
C 12.778646 12.220713 28.949883  
C 14.226526 11.970529 29.003168  
C 14.856440 15.917837 30.212950  
C 13.443122 16.156631 30.159954  
C 11.695060 14.072399 30.098406  
C 12.183914 12.727772 30.138142  
C 14.873586 12.247247 30.235447  
C 15.798149 13.345251 30.246721  
C 12.719660 15.886163 31.404282  
C 11.808792 14.781473 31.368700  
C 12.721596 12.323493 31.440142  
C 14.126830 12.048135 31.487152  
C 15.819876 14.066650 31.517460  
C 15.311729 15.412739 31.512833  
C 11.515253 14.086004 32.595383  
C 12.058208 12.731937 32.699688  
C 14.771504 12.193505 32.797367  
C 15.772107 13.327150 32.778221  
C 14.746490 15.986925 32.760712

C 13.309696 16.268299 32.669071  
V 13.761806 14.050556 32.588371  
V 14.322518 13.823901 35.258755  
V 16.027023 12.133152 34.499416  
V 11.891970 14.334023 34.522572  
V 15.925694 14.898941 34.007877  
V 13.425484 15.997578 34.614269  
V 13.238041 12.055419 34.279793  
V 14.721799 13.324459 37.835060  
V 15.582952 15.367313 36.692966  
V 12.784520 14.792009 36.931095  
V 12.464946 12.851426 36.542900  
V 15.024333 11.785792 36.659790  
V 16.696856 13.816891 36.276695

06H60C13Cr

H 12.914815 16.421316 20.631453  
H 11.404840 14.421522 20.626884  
H 15.678689 16.055655 20.636766  
H 16.642729 13.743692 20.642414  
H 14.964100 11.510322 20.647850  
H 12.477660 11.832584 20.637516  
C 16.186779 14.179339 21.532276  
C 15.666136 15.428653 21.529377  
C 12.769728 15.806802 21.520927  
C 11.954736 14.726741 21.518272  
C 13.080430 12.020637 21.527149

C 14.422512 11.847056 21.532967  
C 14.946582 15.846606 22.743282  
C 13.565150 16.025440 22.739296  
C 11.955415 13.899206 22.734800  
C 12.490410 12.612894 22.738731  
C 15.133959 12.269339 22.750275  
C 15.973831 13.381455 22.750439  
C 12.872896 15.777143 23.994146  
C 12.004930 14.629312 23.991373  
C 13.041483 12.142429 23.998896  
C 14.469100 11.959085 24.005325  
C 16.099440 14.104151 24.005888  
C 15.543543 15.432066 24.002893  
C 11.881143 13.911626 25.216003  
C 12.443877 12.567747 25.219194  
C 15.146704 12.221783 25.230558  
C 16.028749 13.380224 25.231430  
C 14.976187 15.893831 25.225924  
C 13.531528 16.079372 25.221632  
C 13.038668 12.151833 26.452608  
C 14.455160 11.971880 26.460011  
C 16.091251 14.110603 26.461533  
C 15.537586 15.427000 26.458139  
C 12.865138 15.767387 26.450216  
C 11.997001 14.633847 26.447643  
C 15.118540 12.265435 27.712925  
C 15.984223 13.390054 27.714928

C 14.948242 15.859430 27.709229  
C 13.540692 16.033705 27.705803  
C 11.906239 13.909175 27.700127  
C 12.457393 12.602528 27.698437  
C 16.099155 14.110451 28.955938  
C 15.544201 15.444324 28.953417  
C 12.854817 15.778234 28.945688  
C 11.976133 14.632150 28.945007  
C 13.014814 12.135119 28.939905  
C 14.445275 11.962053 28.949337  
C 14.974745 15.920862 30.177193  
C 13.517950 16.085005 30.172632  
C 11.845985 13.907351 30.169497  
C 12.400991 12.549742 30.162060  
C 15.128786 12.215164 30.181093  
C 16.019264 13.377074 30.183214  
C 12.844605 15.763741 31.398542  
C 11.975275 14.630640 31.406183  
C 13.006332 12.128959 31.385929  
C 14.421803 11.959879 31.398651  
C 16.071091 14.121264 31.401711  
C 15.541672 15.442967 31.403709  
C 11.866918 13.890535 32.672394  
C 12.429165 12.587107 32.664185  
C 15.064056 12.275843 32.679161  
C 15.885216 13.448630 32.694710  
C 14.949902 15.816382 32.700867

C 13.541666 16.040501 32.649120  
Cr 13.882268 14.044028 33.345680  
Cr 14.027854 14.099393 35.423466  
Cr 15.748750 12.324545 34.596573  
Cr 11.632762 14.165952 34.693367  
Cr 16.050615 14.816439 34.295547  
Cr 13.573862 16.376400 34.564541  
Cr 13.226552 11.715818 34.332497  
Cr 13.703121 13.974663 38.088020  
Cr 15.016349 16.022808 36.850548  
Cr 12.432394 15.616972 36.674957  
Cr 12.311475 12.582717 36.614723  
Cr 14.746578 11.901157 36.592339  
Cr 16.019388 13.884224 36.982059

06H60C13Mn

H 13.156530 16.425781 20.614391  
H 11.462539 14.583953 20.640783  
H 15.877081 15.847496 20.628904  
H 16.619547 13.455451 20.658730  
H 14.735157 11.413992 20.684885  
H 12.287292 11.938920 20.679710  
C 16.203735 13.940311 21.543020  
C 15.802894 15.232381 21.526857  
C 12.947351 15.849985 21.517004  
C 12.030432 14.854165 21.531940  
C 12.901997 12.074085 21.570391

C 14.225550 11.789958 21.573191  
C 15.124014 15.725346 22.736280  
C 13.759523 16.018122 22.731726  
C 11.949027 14.051177 22.760704  
C 12.363694 12.718518 22.778831  
C 14.974339 12.154020 22.784309  
C 15.919781 13.179771 22.769747  
C 13.052473 15.850813 23.989048  
C 12.076473 14.789703 24.004436  
C 12.877510 12.217221 24.039680  
C 14.287225 11.915340 24.041012  
C 16.116055 13.899408 24.014843  
C 15.685738 15.275711 23.997845  
C 11.898003 14.101937 25.239626  
C 12.327555 12.711875 25.257885  
C 14.987395 12.130000 25.260563  
C 15.975775 13.198165 25.246201  
C 15.162213 15.797220 25.214951  
C 13.740809 16.109047 25.209503  
C 12.886596 12.255911 26.494730  
C 14.281154 11.950268 26.493191  
C 16.106800 13.931851 26.467962  
C 15.681061 15.294710 26.453588  
C 13.054668 15.877606 26.445780  
C 12.089017 14.826475 26.461773  
C 14.976163 12.187770 27.736887  
C 15.938391 13.232929 27.723936

C 15.141699 15.796626 27.699635  
C 13.754387 16.106836 27.692989  
C 11.940421 14.131404 27.723709  
C 12.360516 12.775322 27.739641  
C 16.127569 13.951246 28.953974  
C 15.696055 15.330579 28.944019  
C 13.054410 15.930457 28.935923  
C 12.080281 14.866486 28.955645  
C 12.881912 12.278829 28.986549  
C 14.289119 11.961648 28.980511  
C 15.180472 15.861473 30.168274  
C 13.753644 16.197565 30.158195  
C 11.890823 14.170970 30.196012  
C 12.324078 12.772116 30.211702  
C 15.010515 12.159652 30.200224  
C 15.999125 13.240013 30.185715  
C 13.059722 15.955659 31.378395  
C 12.097641 14.905849 31.404242  
C 12.901587 12.303576 31.432255  
C 14.289453 11.973822 31.422001  
C 16.136696 13.988193 31.402554  
C 15.705029 15.349971 31.402063  
C 12.033796 14.231978 32.707825  
C 12.479313 12.862561 32.727776  
C 14.948052 12.268840 32.702148  
C 15.942794 13.276705 32.644913  
C 15.146058 15.830784 32.670776



C 13.758745 16.103855 32.660801  
Mn 14.066764 14.090457 33.332043  
Mn 13.908453 13.946208 35.637962  
Mn 16.003004 12.924281 34.527267  
Mn 11.524534 13.374286 34.479141  
Mn 15.487745 15.705906 34.633770  
Mn 12.533951 15.861618 34.270618  
Mn 13.628793 11.796894 34.241520  
Mn 13.930874 13.759426 38.098221  
Mn 14.038585 16.047239 36.636269  
Mn 11.907668 14.738045 36.648296  
Mn 12.506464 12.296201 36.518593  
Mn 14.964293 11.829590 36.614933  
Mn 15.973402 14.239439 36.548065

06H60C13Fe

H 13.103490 16.501942 20.650497  
H 11.422904 14.642046 20.645351  
H 15.852372 15.916555 20.648384  
H 16.619251 13.529016 20.645510  
H 14.738168 11.445034 20.642910  
H 12.285686 11.967542 20.641735  
C 16.192131 13.997596 21.533251  
C 15.778749 15.285497 21.535084  
C 12.911959 15.895337 21.536655  
C 12.004954 14.891594 21.533567  
C 12.904558 12.103713 21.529716

C 14.228036 11.822323 21.530336  
C 15.092476 15.752250 22.751177  
C 13.731030 16.039112 22.751303  
C 11.942113 14.061652 22.747093  
C 12.368528 12.737639 22.745399  
C 14.975762 12.183757 22.746582  
C 15.908943 13.215630 22.748631  
C 13.025199 15.845295 24.009674  
C 12.061251 14.781488 24.007002  
C 12.885623 12.220645 24.003874  
C 14.291160 11.925025 24.005079  
C 16.097961 13.921463 24.008987  
C 15.657606 15.288242 24.010042  
C 11.878325 14.073382 25.231030  
C 12.324185 12.686589 25.228636  
C 14.991342 12.124909 25.230984  
C 15.970237 13.203656 25.234909  
C 15.134568 15.797350 25.235823  
C 13.708492 16.095629 25.235598  
C 12.884744 12.214998 26.457489  
C 14.284775 11.923372 26.458496  
C 16.095430 13.924331 26.465490  
C 15.658927 15.286427 26.464861  
C 13.020408 15.839753 26.463455  
C 12.060857 14.780140 26.462002  
C 14.971785 12.162520 27.710442  
C 15.918977 13.215550 27.716852

C 15.103398 15.762266 27.715717  
C 13.718650 16.047808 27.714113  
C 11.921412 14.061436 27.712391  
C 12.350478 12.711592 27.707621  
C 16.093214 13.922524 28.963503  
C 15.659197 15.295772 28.963060  
C 13.015615 15.845201 28.957705  
C 12.051628 14.776929 28.958670  
C 12.873197 12.199080 28.950296  
C 14.283096 11.906535 28.951027  
C 15.139355 15.821449 30.187613  
C 13.697426 16.117884 30.183485  
C 11.863006 14.064400 30.187603  
C 12.299401 12.663095 30.178804  
C 14.994946 12.094295 30.180645  
C 15.966326 13.196674 30.191313  
C 12.991739 15.863030 31.402704  
C 12.050696 14.784596 31.409613  
C 12.869327 12.156896 31.384222  
C 14.267629 11.860103 31.384167  
C 16.086660 13.931277 31.414349  
C 15.672979 15.302653 31.412132  
C 11.998821 14.040163 32.670635  
C 12.465523 12.715590 32.677494  
C 14.868299 12.204204 32.676456  
C 15.825451 13.227260 32.668266  
C 15.092236 15.770259 32.673904

C 13.710001 16.060028 32.665367  
Fe 14.013220 14.110441 33.266121  
Fe 13.975327 13.999630 35.573296  
Fe 15.844988 13.061062 34.606552  
Fe 11.892831 13.887033 34.608528  
Fe 15.487857 15.565525 34.606670  
Fe 13.117873 15.998043 34.539581  
Fe 13.560017 11.948898 34.213284  
Fe 14.166146 13.932495 37.945839  
Fe 14.310753 16.163403 36.643169  
Fe 12.246935 14.906508 36.862900  
Fe 12.538292 12.405780 36.541969  
Fe 14.813461 12.014898 36.584412  
Fe 16.117641 14.303789 36.660763

06H60C13Co

H 13.118402 16.496126 20.666761  
H 11.438640 14.641739 20.659925  
H 15.822861 15.926666 20.662634  
H 16.588619 13.543052 20.654316  
H 14.737365 11.494299 20.647903  
H 12.287674 12.010979 20.650671  
C 16.180611 14.012258 21.550293  
C 15.766104 15.300981 21.554327  
C 12.914013 15.903089 21.559113  
C 12.004722 14.900388 21.555599  
C 12.901263 12.128706 21.544950

C 14.225805 11.849379 21.543396  
C 15.092047 15.770924 22.773792  
C 13.724035 16.055529 22.776045  
C 11.929325 14.074855 22.770031  
C 12.359354 12.745721 22.765213  
C 14.973485 12.193148 22.762547  
C 15.910934 13.229313 22.765585  
C 13.019840 15.858664 24.028605  
C 12.050152 14.790606 24.026377  
C 12.877768 12.226182 24.016636  
C 14.290737 11.930846 24.015631  
C 16.099859 13.931752 24.021181  
C 15.659065 15.305941 24.025185  
C 11.879190 14.078769 25.247721  
C 12.323771 12.693734 25.242027  
C 14.987574 12.136602 25.240549  
C 15.964968 13.213333 25.243792  
C 15.130968 15.804922 25.250471  
C 13.706928 16.100214 25.251925  
C 12.885592 12.222212 26.472977  
C 14.283272 11.933828 26.471985  
C 16.090403 13.931229 26.477415  
C 15.656133 15.291121 26.479549  
C 13.021590 15.841186 26.482124  
C 12.063832 14.783485 26.480883  
C 14.972832 12.161410 27.722410  
C 15.928067 13.218824 27.726364

C 15.110168 15.773585 27.728664  
C 13.717403 16.060364 27.729828  
C 11.913599 14.066862 27.728376  
C 12.343996 12.707880 27.723389  
C 16.096048 13.925106 28.965164  
C 15.664164 15.301902 28.966579  
C 13.017405 15.851424 28.966852  
C 12.051513 14.780374 28.966167  
C 12.871140 12.198523 28.957764  
C 14.284349 11.905456 28.956284  
C 15.139603 15.821684 30.192059  
C 13.705162 16.116251 30.193104  
C 11.879548 14.066332 30.197443  
C 12.310040 12.668384 30.191732  
C 14.988495 12.102506 30.189411  
C 15.954246 13.202072 30.194302  
C 13.006498 15.867986 31.422735  
C 12.063414 14.786380 31.420439  
C 12.868201 12.151207 31.400873  
C 14.267986 11.853356 31.398617  
C 16.083502 13.933540 31.416559  
C 15.675344 15.308767 31.420332  
C 11.975728 14.022609 32.662605  
C 12.437673 12.694198 32.692524  
C 14.886316 12.173795 32.688110  
C 15.850461 13.199078 32.656116  
C 15.110796 15.810259 32.679661

C 13.727565 16.102779 32.680656  
Co 14.029726 14.139807 33.120342  
Co 14.008501 13.975744 35.555317  
Co 15.884684 12.980222 34.528301  
Co 11.880803 13.855548 34.540203  
Co 15.572994 15.402677 34.532867  
Co 13.169846 15.928568 34.544209  
Co 13.591067 12.089984 34.265079  
Co 13.992686 13.854926 37.841263  
Co 14.452040 15.981619 36.627956  
Co 12.207597 14.945198 36.632488  
Co 12.463015 12.535571 36.514801  
Co 14.818529 12.020898 36.507225  
Co 16.060349 14.104572 36.616699

06H60C13Ni

H 13.120120 16.472452 20.672941  
H 11.434552 14.622901 20.669989  
H 15.821710 15.898369 20.667904  
H 16.583740 13.513235 20.660730  
H 14.727633 11.469942 20.654020  
H 12.279330 11.988994 20.657270  
C 16.177633 13.984428 21.556606  
C 15.765895 15.274022 21.560535  
C 12.914893 15.881534 21.566362  
C 12.002634 14.880963 21.564640  
C 12.892828 12.106236 21.551470

C 14.217243 11.825527 21.550043  
C 15.093633 15.745636 22.780357  
C 13.726427 16.033360 22.782860  
C 11.926820 14.055799 22.778515  
C 12.351811 12.724424 22.771677  
C 14.965506 12.168393 22.768381  
C 15.905115 13.202382 22.771797  
C 13.022270 15.837818 24.036009  
C 12.049922 14.773738 24.033928  
C 12.871662 12.206851 24.022625  
C 14.281681 11.907200 24.020399  
C 16.095543 13.904854 24.027729  
C 15.658933 15.278809 24.032167  
C 11.873590 14.063028 25.256437  
C 12.318881 12.678855 25.248428  
C 14.981800 12.110233 25.244570  
C 15.961040 13.184832 25.250525  
C 15.131709 15.776283 25.259096  
C 13.709808 16.076033 25.260605  
C 12.879005 12.202757 26.475964  
C 14.276941 11.906004 26.473473  
C 16.090536 13.899714 26.485590  
C 15.656920 15.261281 26.487183  
C 13.021210 15.823029 26.489784  
C 12.057037 14.766955 26.490677  
C 14.967570 12.131989 27.721828  
C 15.924570 13.184840 27.732529

C 15.109184 15.739877 27.734930  
C 13.719252 16.032749 27.736042  
C 11.910205 14.047160 27.736675  
C 12.341788 12.690658 27.725391  
C 16.092508 13.888599 28.976961  
C 15.664207 15.266098 28.973944  
C 13.018318 15.827618 28.975018  
C 12.053340 14.756265 28.980904  
C 12.866595 12.168900 28.956057  
C 14.278391 11.868898 28.954014  
C 15.141601 15.790266 30.195940  
C 13.709254 16.091944 30.197096  
C 11.893966 14.034712 30.210810  
C 12.306948 12.633040 30.189228  
C 14.984053 12.059635 30.185204  
C 15.938171 13.165958 30.205458  
C 13.010966 15.852143 31.430029  
C 12.090389 14.743136 31.442575  
C 12.861771 12.090110 31.388914  
C 14.259229 11.791075 31.387388  
C 16.054951 13.891677 31.438356  
C 15.679245 15.284784 31.429270  
C 12.047316 13.964354 32.680237  
C 12.463296 12.620014 32.686237  
C 14.848440 12.104932 32.681946  
C 15.778096 13.160931 32.673489  
C 15.121468 15.834853 32.662674

C 13.745771 16.128874 32.664230  
Ni 14.047040 14.188676 33.197311  
Ni 14.036107 14.089423 35.517910  
Ni 15.975852 13.109550 34.518074  
Ni 11.857084 14.005774 34.527763  
Ni 15.622684 15.554432 34.481682  
Ni 13.174236 16.077660 34.482002  
Ni 13.603519 12.092951 34.159504  
Ni 13.983029 14.041267 37.821999  
Ni 14.417303 16.084805 36.620926  
Ni 12.191423 15.173265 36.572651  
Ni 12.466436 12.715600 36.490154  
Ni 14.827398 12.193371 36.489571  
Ni 16.071009 14.320264 36.585793

06H60C13Cu

H 13.147296 16.427523 20.641994  
H 11.473086 14.577251 20.647715  
H 15.810114 15.890103 20.652960  
H 16.573635 13.512235 20.654888  
H 14.751482 11.489798 20.658163  
H 12.307055 11.998049 20.654615  
C 16.180544 13.986488 21.555115  
C 15.766150 15.276674 21.553734  
C 12.926394 15.862389 21.548443  
C 12.016923 14.857067 21.550713  
C 12.910666 12.103517 21.557051

C 14.237366 11.826673 21.559216  
C 15.098074 15.758069 22.769831  
C 13.722919 16.043743 22.767153  
C 11.927358 14.047782 22.771786  
C 12.356490 12.709272 22.774473  
C 14.982985 12.167051 22.776855  
C 15.925529 13.208684 22.773956  
C 13.018968 15.845336 24.014177  
C 12.045226 14.773422 24.015978  
C 12.881288 12.204868 24.021334  
C 14.299891 11.906507 24.023315  
C 16.104292 13.919529 24.019609  
C 15.663871 15.299816 24.017977  
C 11.885689 14.067147 25.242792  
C 12.331929 12.687063 25.244570  
C 14.991235 12.131021 25.246870  
C 15.964220 13.206715 25.245707  
C 15.124968 15.790613 25.240911  
C 13.704836 16.086336 25.240730  
C 12.889219 12.218335 26.479088  
C 14.288760 11.930099 26.482651  
C 16.094391 13.926203 26.479002  
C 15.652471 15.284369 26.475460  
C 13.018749 15.837471 26.475819  
C 12.062056 14.777840 26.477066  
C 14.981915 12.156008 27.726755  
C 15.950012 13.212359 27.728077  
C 15.109489 15.770967 27.720442  
C 13.711672 16.063328 27.724945  
C 11.905212 14.064702 27.724167  
C 12.341010 12.702848 27.722569  
C 16.109818 13.924597 28.957964  
C 15.672270 15.303574 28.952782  
C 13.014835 15.844672 28.957806  
C 12.033277 14.784004 28.958492  
C 12.880205 12.208831 28.952929  
C 14.291591 11.907534 28.958464  
C 15.138275 15.807219 30.176754  
C 13.710073 16.080290 30.188324  
C 11.874286 14.073565 30.189230  
C 12.323850 12.688298 30.182541  
C 14.985644 12.121060 30.193995  
C 15.956634 13.208201 30.196033  
C 13.022108 15.851585 31.434504  
C 12.061805 14.778045 31.432743  
C 12.867359 12.174001 31.404758  
C 14.266466 11.885336 31.413635  
C 16.106621 13.938329 31.420233  
C 15.673539 15.305485 31.411797  
C 11.874781 13.987913 32.647377  
C 12.297635 12.647511 32.660824  
C 14.950943 12.187135 32.662308  
C 15.902669 13.196821 32.654503  
C 15.129588 15.839039 32.641941

C 13.757199 16.202137 32.661350  
Cu 13.914392 14.151969 33.211758  
Cu 13.980500 14.051704 35.613773  
Cu 15.755609 12.589743 34.518829  
Cu 11.728330 14.273059 34.567570  
Cu 15.885670 15.099941 34.325855  
Cu 13.265954 16.243525 34.549095  
Cu 13.312418 12.014517 34.258957  
Cu 14.063537 13.950987 38.012650  
Cu 14.790067 16.016582 36.571533  
Cu 12.387168 15.344003 36.748695  
Cu 12.209029 12.849665 36.576603  
Cu 14.523787 11.943052 36.526764  
Cu 16.146637 13.920806 36.547958

06H60C13Zn

H 12.931813 16.594952 20.652596  
H 11.301010 14.690685 20.633091  
H 15.669805 16.058029 20.588980  
H 16.504711 13.696756 20.526203  
H 14.693062 11.572285 20.513521  
H 12.232523 12.043162 20.557119  
C 16.089334 14.136961 21.433527  
C 15.637849 15.412235 21.467293  
C 12.766654 15.967756 21.529366  
C 11.886948 14.939842 21.518690  
C 12.859847 12.172293 21.440117

C 14.188755 11.918280 21.416569  
C 14.966517 15.840622 22.704889  
C 13.597538 16.106316 22.735706  
C 11.861813 14.082274 22.715054  
C 12.325186 12.767578 22.675909  
C 14.947159 12.266603 22.628508  
C 15.855404 13.324207 22.637285  
C 12.917310 15.870440 23.997004  
C 11.976348 14.777726 23.987087  
C 12.871330 12.235995 23.911491  
C 14.287699 11.968250 23.885967  
C 16.049377 14.007726 23.903585  
C 15.565512 15.365241 23.939648  
C 11.837911 14.039384 25.196850  
C 12.324909 12.667006 25.151958  
C 15.003942 12.161000 25.100403  
C 15.960074 13.260895 25.113144  
C 15.049726 15.828332 25.183769  
C 13.617825 16.099136 25.214918  
C 12.922889 12.187177 26.361607  
C 14.323936 11.925471 26.335896  
C 16.084652 13.958297 26.360308  
C 15.606511 15.300827 26.393713  
C 12.960546 15.797230 26.450779  
C 12.026461 14.720677 26.444817  
C 15.033614 12.141605 27.581545  
C 15.963978 13.215927 27.603317

C 15.069475 15.743797 27.666033  
C 13.673393 16.002584 27.695673  
C 11.919621 13.970833 27.685169  
C 12.393474 12.632584 27.634005  
C 16.143829 13.900661 28.859940  
C 15.668100 15.271338 28.883392  
C 12.990411 15.766836 28.937847  
C 12.049391 14.661338 28.940662  
C 12.947241 12.092579 28.842575  
C 14.376872 11.828097 28.816118  
C 15.128949 15.723286 30.120302  
C 13.700365 15.986130 30.149839  
C 11.954048 13.910995 30.154022  
C 12.409540 12.533801 30.087448  
C 15.088521 12.038637 30.035967  
C 16.008852 13.161653 30.078001  
C 13.043229 15.686290 31.403011  
C 12.163044 14.581923 31.420467  
C 13.007432 12.028492 31.290344  
C 14.398264 11.774179 31.265923  
C 16.103128 13.856018 31.351669  
C 15.680811 15.204121 31.351490  
C 12.043858 13.769401 32.651356  
C 12.504251 12.461117 32.576397  
C 15.063981 11.999480 32.532112  
C 15.964200 13.049685 32.585812  
C 15.160893 15.839822 32.564636

C 13.795766 16.077932 32.596737  
Zn 14.061229 14.177814 33.881256  
Zn 15.484161 14.771096 36.392532  
Zn 16.477049 13.262452 34.524475  
Zn 11.499467 14.135865 34.566578  
Zn 16.033792 16.025841 34.390167  
Zn 13.061427 16.565025 34.454876  
Zn 13.702589 11.672638 34.105480  
Zn 12.714136 13.705723 38.697926  
Zn 14.331232 15.668711 38.525185  
Zn 12.757592 15.249567 36.489517  
Zn 12.552350 12.612947 36.306797  
Zn 15.014965 12.198133 36.312157  
Zn 15.158595 13.281402 38.683876

06H60C13Y

H 13.293447 16.174881 20.509583  
H 11.755416 14.220796 20.499439  
H 15.913725 15.767421 20.697548  
H 16.841928 13.471037 20.882301  
H 15.213110 11.391367 20.880432  
H 12.762680 11.755001 20.684551  
C 16.394129 13.968197 21.743858  
C 15.886405 15.223955 21.642797  
C 13.040010 15.651562 21.432526  
C 12.199436 14.584715 21.426920  
C 13.281836 11.910652 21.631264



C 14.620857 11.712077 21.738529  
C 15.137012 15.741117 22.789268  
C 13.735524 15.950006 22.685820  
C 12.066141 13.829212 22.675035  
C 12.598463 12.516297 22.775591  
C 15.265757 12.124727 22.986546  
C 16.146391 13.238798 22.989290  
C 12.963855 15.764730 23.879343  
C 12.055304 14.614295 23.873802  
C 13.065928 12.103633 24.066540  
C 14.512135 11.891897 24.181976  
C 16.193844 14.021948 24.187616  
C 15.645029 15.376838 24.078028  
C 11.886253 13.955852 25.123682  
C 12.425683 12.622626 25.225792  
C 15.096261 12.238723 25.433199  
C 15.990901 13.370750 25.436962  
C 14.983682 15.871336 25.237206  
C 13.559950 16.077250 25.132278  
C 12.923456 12.250324 26.526731  
C 14.330952 12.047002 26.640110  
C 15.994169 14.156717 26.646914  
C 15.460755 15.475470 26.538187  
C 12.805799 15.854421 26.342606  
C 11.920978 14.736651 26.337648  
C 14.939431 12.348645 27.908829  
C 15.839075 13.493439 27.913689

C 14.820023 16.009371 27.709084  
C 13.387119 16.216486 27.607716  
C 11.702369 14.080863 27.599070  
C 12.247845 12.737702 27.695892  
C 15.861376 14.276596 29.101856  
C 15.316468 15.627611 28.984556  
C 12.623361 16.012146 28.792553  
C 11.720967 14.866920 28.787369  
C 12.736468 12.341311 28.969404  
C 14.178818 12.135408 29.091627  
C 14.629954 16.103016 30.146296  
C 13.228441 16.283548 30.064608  
C 11.596144 14.206437 30.054283  
C 12.105679 12.887991 30.129280  
C 14.758615 12.494944 30.356897  
C 15.645136 13.620588 30.362740  
C 12.466622 16.134146 31.325899  
C 11.554406 14.973948 31.319862  
C 12.557133 12.470675 31.454788  
C 13.995562 12.290332 31.587833  
C 15.655009 14.402431 31.599756  
C 15.135839 15.754952 31.473475  
C 11.073573 14.175734 32.450989  
C 11.639186 12.791922 32.538963  
C 14.711932 12.470985 32.881271  
C 15.639977 13.652963 32.888794  
C 14.596991 16.556496 32.563637

C 13.120310 16.779846 32.466938  
Y 13.340028 14.495487 33.045101  
Y 14.894717 13.249921 35.361645  
Y 16.948200 11.683628 33.392483  
Y 10.530804 13.297496 34.471684  
Y 16.586311 15.634037 33.659721  
Y 13.824470 17.476267 34.510414  
Y 12.999025 11.064436 33.613811  
Y 15.044822 13.078850 38.598473  
Y 15.860379 16.020515 37.041222  
Y 12.609714 15.010843 36.914410  
Y 12.414135 11.611583 36.984341  
Y 15.683150 10.409204 36.479275  
Y 17.813221 13.107994 36.539555

06H60C13Zr

H 13.251287 16.285086 20.526283  
H 11.664609 14.364067 20.513039  
H 15.909934 15.860592 20.666649  
H 16.787693 13.529280 20.768867  
H 15.064045 11.455002 20.744703  
H 12.607449 11.852978 20.628593  
C 16.343691 14.007917 21.642624  
C 15.865810 15.276300 21.586868  
C 13.012677 15.739773 21.440338  
C 12.148704 14.694077 21.432980  
C 13.162309 11.995507 21.556812

C 14.499514 11.779039 21.619905  
C 15.134857 15.767212 22.758574  
C 13.742678 15.997700 22.685860  
C 12.028909 13.918687 22.671469  
C 12.525961 12.597059 22.732220  
C 15.181984 12.161605 22.859390  
C 16.082138 13.249869 22.870878  
C 12.991014 15.810326 23.897621  
C 12.064026 14.681392 23.888945  
C 13.018393 12.145382 24.004644  
C 14.456215 11.905802 24.074564  
C 16.178410 13.998535 24.095112  
C 15.662393 15.363205 24.034382  
C 11.898803 13.997140 25.125214  
C 12.407152 12.644705 25.187847  
C 15.077044 12.200464 25.321255  
C 15.994748 13.319394 25.331751  
C 15.042645 15.854656 25.215845  
C 13.616755 16.091366 25.143221  
C 12.924693 12.228964 26.466726  
C 14.330006 11.998343 26.536955  
C 16.032351 14.079541 26.554848  
C 15.535090 15.413510 26.494684  
C 12.888069 15.846659 26.361122  
C 11.984637 14.744251 26.352066  
C 14.958308 12.278809 27.805449  
C 15.871427 13.396212 27.814342

C 14.932946 15.935511 27.695793  
C 13.509130 16.158035 27.623022  
C 11.788193 14.057540 27.603764  
C 12.286039 12.704891 27.667156  
C 15.957357 14.154661 29.022240  
C 15.457841 15.532122 28.960436  
C 12.765884 15.942418 28.821398  
C 11.839674 14.812094 28.811827  
C 12.775436 12.256506 28.933004  
C 14.223059 12.038489 29.006422  
C 14.814361 16.013609 30.144449  
C 13.401538 16.207346 30.073053  
C 11.695610 14.123848 30.055992  
C 12.167575 12.776400 30.117901  
C 14.840075 12.365587 30.253239  
C 15.749350 13.477585 30.261843  
C 12.649261 16.023951 31.323677  
C 11.717697 14.886383 31.313894  
C 12.658665 12.331607 31.436661  
C 14.100059 12.114668 31.494970  
C 15.839801 14.243236 31.511715  
C 15.339685 15.613841 31.463768  
C 11.334383 14.132658 32.500053  
C 11.878035 12.751359 32.620327  
C 14.835192 12.280731 32.758709  
C 15.814879 13.478630 32.768276  
C 14.763548 16.283670 32.648628

C 13.301174 16.539886 32.519203  
Zr 13.656330 14.243328 32.598999  
Zr 14.248268 13.734858 35.602852  
Zr 16.458918 11.942854 34.280247  
Zr 11.400743 13.786901 34.624710  
Zr 16.352180 15.245092 34.115479  
Zr 13.636330 16.523987 34.646561  
Zr 13.201553 11.386680 34.080906  
Zr 14.587341 13.432871 38.458244  
Zr 15.371387 15.973268 37.048763  
Zr 12.503263 15.144131 37.389122  
Zr 12.269548 12.169098 37.015396  
Zr 14.993292 11.132468 36.646599  
Zr 16.937984 13.516796 36.668053

06H60C13Nb

H 13.223021 16.356928 20.552021  
H 11.620377 14.446676 20.535563  
H 15.881011 15.889883 20.652187  
H 16.721058 13.542893 20.724297  
H 14.985345 11.463889 20.713800  
H 12.531492 11.897701 20.621735  
C 16.294230 14.022062 21.606335  
C 15.837158 15.298195 21.567568  
C 12.991071 15.801262 21.461426  
C 12.119999 14.762276 21.452526  
C 13.099516 12.035261 21.542675

C 14.433858 11.800793 21.592598  
C 15.125500 15.788808 22.753019  
C 13.737645 16.031910 22.701420  
C 12.008780 13.971721 22.683565  
C 12.486833 12.645865 22.727360  
C 15.133175 12.176028 22.826160  
C 16.036316 13.258962 22.832182  
C 12.998104 15.836842 23.921902  
C 12.062124 14.719704 23.912504  
C 12.981488 12.172314 23.993988  
C 14.418075 11.918240 24.046490  
C 16.156288 13.997353 24.061386  
C 15.662789 15.369324 24.020607  
C 11.899164 14.028340 25.145672  
C 12.391400 12.666797 25.189201  
C 15.058372 12.195301 25.284374  
C 15.985099 13.307569 25.291653  
C 15.063639 15.858530 25.214476  
C 13.637377 16.109720 25.163157  
C 12.923327 12.235477 26.455656  
C 14.326184 11.988006 26.505001  
C 16.046322 14.055157 26.519163  
C 15.563191 15.394322 26.480635  
C 12.920583 15.859640 26.387781  
C 12.010245 14.765465 26.376162  
C 14.984348 12.242086 27.760904  
C 15.901126 13.352907 27.767578

C 14.973790 15.897039 27.697802  
C 13.558818 16.153042 27.653172  
C 11.831779 14.070786 27.630760  
C 12.323153 12.717918 27.672670  
C 16.010876 14.087926 28.986534  
C 15.509381 15.465986 28.948751  
C 12.824319 15.954246 28.865238  
C 11.892484 14.818318 28.845304  
C 12.835079 12.247540 28.923685  
C 14.275371 11.985384 28.974173  
C 14.889299 15.939374 30.139580  
C 13.484571 16.194950 30.109619  
C 11.773177 14.108199 30.071295  
C 12.260010 12.768384 30.115965  
C 14.934096 12.266896 30.209999  
C 15.842319 13.379105 30.211344  
C 12.774909 15.957189 31.385431  
C 11.856798 14.840137 31.341925  
C 12.788234 12.336446 31.418327  
C 14.214504 12.047825 31.470600  
C 15.917551 14.123092 31.467756  
C 15.393944 15.477383 31.430937  
C 11.455535 14.100513 32.521229  
C 12.010074 12.710842 32.620487  
C 14.904755 12.217272 32.763512  
C 15.883265 13.413404 32.754772  
C 14.879593 16.113180 32.662598

C 13.411145 16.380009 32.643009  
Nb 13.790733 14.154668 32.615211  
Nb 14.169653 13.719101 35.483871  
Nb 16.245750 12.209283 34.607105  
Nb 11.440222 13.851960 34.580948  
Nb 15.992859 15.120666 34.220409  
Nb 12.979287 16.066109 34.753712  
Nb 13.219977 11.713769 34.195873  
Nb 14.451816 13.766972 38.314110  
Nb 15.093090 15.815077 36.822342  
Nb 12.182650 14.772679 37.159882  
Nb 12.427586 12.278340 36.856632  
Nb 15.221515 11.703038 37.131035  
Nb 16.820396 13.791754 36.677681

06H60C13Mo

H 13.053955 16.418907 20.574919  
H 11.482109 14.471131 20.557096  
H 15.767893 15.977668 20.612808  
H 16.683281 13.649643 20.638653  
H 14.972275 11.511082 20.624035  
H 12.502213 11.905048 20.575247  
C 16.241280 14.102790 21.526863  
C 15.746659 15.362501 21.513380  
C 12.871886 15.819693 21.467884  
C 12.021492 14.765843 21.458185  
C 13.089033 12.052291 21.482922

C 14.426010 11.840458 21.508644  
C 15.035158 15.807570 22.719984  
C 13.652422 16.026352 22.696281  
C 11.977018 13.942984 22.676294  
C 12.489711 12.640922 22.688744  
C 15.133080 12.226800 22.738766  
C 16.011152 13.316849 22.747482  
C 12.939992 15.799029 23.936026  
C 12.031328 14.673429 23.925535  
C 13.014156 12.158318 23.950338  
C 14.445791 11.932693 23.977058  
C 16.138201 14.038465 23.995857  
C 15.611444 15.388787 23.981396  
C 11.889044 13.959682 25.149731  
C 12.419509 12.606194 25.161814  
C 15.108385 12.190331 25.209063  
C 16.019760 13.322328 25.219500  
C 15.031666 15.855944 25.193388  
C 13.595228 16.078081 25.169260  
C 12.987623 12.175184 26.411066  
C 14.396135 11.960287 26.435070  
C 16.080482 14.053709 26.454233  
C 15.562881 15.380098 26.440784  
C 12.907055 15.787912 26.393467  
C 12.014018 14.679216 26.384041  
C 15.056116 12.223488 27.695621  
C 15.955528 13.339746 27.706419

C 14.977576 15.846004 27.680124  
C 13.568325 16.060482 27.654701  
C 11.882961 13.960637 27.637426  
C 12.393882 12.628524 27.650703  
C 16.060692 14.065722 28.932762  
C 15.552171 15.422264 28.926033  
C 12.868841 15.819353 28.880852  
C 11.958711 14.684568 28.870928  
C 12.927942 12.150681 28.896070  
C 14.360895 11.944952 28.912811  
C 14.970419 15.891641 30.148193  
C 13.537179 16.087009 30.109402  
C 11.839853 13.964361 30.094851  
C 12.336864 12.604532 30.121117  
C 15.013357 12.221703 30.158209  
C 15.914371 13.356643 30.166962  
C 12.839518 15.816672 31.351181  
C 11.944635 14.695541 31.341099  
C 12.889655 12.161219 31.384716  
C 14.306134 11.948480 31.386137  
C 16.014036 14.094847 31.401619  
C 15.512889 15.437889 31.414433  
C 11.636363 13.940068 32.556057  
C 12.233982 12.601583 32.643223  
C 15.085946 12.179042 32.593472  
C 15.958478 13.268775 32.591827  
C 14.944422 15.988597 32.673084

C 13.498995 16.275820 32.571587  
Mo 13.727934 14.202655 33.272297  
Mo 13.764164 14.169139 36.201099  
Mo 15.447110 12.843201 34.614838  
Mo 11.526390 13.965831 34.610771  
Mo 15.709822 15.468889 34.764053  
Mo 13.404832 16.382402 34.632111  
Mo 12.984592 11.922786 34.697941  
Mo 14.849264 13.441647 38.458412  
Mo 15.520794 15.904212 37.141048  
Mo 11.860759 15.626013 36.356945  
Mo 12.467666 12.011294 36.988945  
Mo 14.741085 11.603871 36.967529  
Mo 16.605524 13.898999 36.946575

06H60C13Tc

H 13.163012 16.685287 20.715393  
H 11.466537 14.851069 20.647888  
H 15.822795 16.092236 20.695164  
H 16.559162 13.704776 20.601080  
H 14.707116 11.689793 20.525749  
H 12.266346 12.241806 20.547140  
C 16.170574 14.149052 21.517868  
C 15.771288 15.442321 21.569199  
C 12.940265 16.078449 21.593822  
C 12.021076 15.084208 21.557272  
C 12.878684 12.314091 21.446451

C 14.199480 12.014852 21.434689  
C 15.112457 15.882342 22.805073  
C 13.744099 16.189707 22.816975  
C 11.927892 14.223333 22.742933  
C 12.341354 12.884398 22.689352  
C 14.952000 12.297889 22.665386  
C 15.903151 13.327146 22.704918  
C 13.037010 15.957320 24.055695  
C 12.052963 14.893780 24.018078  
C 12.851416 12.314077 23.916430  
C 14.269016 11.995961 23.902422  
C 16.101568 13.981709 23.978691  
C 15.672286 15.365417 24.032995  
C 11.879291 14.138095 25.212521  
C 12.313763 12.753282 25.156521  
C 14.968302 12.159794 25.129869  
C 15.955518 13.223752 25.173002  
C 15.144999 15.818633 25.273647  
C 13.727883 16.136396 25.284758  
C 12.874670 12.238052 26.376778  
C 14.266241 11.928610 26.362759  
C 16.093605 13.895963 26.435184  
C 15.665360 15.252735 26.483753  
C 13.037560 15.840410 26.505136  
C 12.069140 14.797053 26.473152  
C 14.967728 12.089579 27.615522  
C 15.944283 13.139967 27.661472

C 15.127286 15.698338 27.748087  
C 13.736173 16.011410 27.757740  
C 11.903032 14.043205 27.699240  
C 12.334518 12.676214 27.642385  
C 16.114828 13.801914 28.918484  
C 15.679824 15.182779 28.963985  
C 13.034781 15.775311 28.984358  
C 12.053729 14.706576 28.954742  
C 12.865376 12.124614 28.851261  
C 14.275165 11.813055 28.835371  
C 15.152196 15.664618 30.198521  
C 13.735721 15.976680 30.205839  
C 11.903860 13.950175 30.164415  
C 12.313245 12.554449 30.111937  
C 14.977977 11.968020 30.083563  
C 15.945157 13.056391 30.131924  
C 13.044088 15.712133 31.451719  
C 12.084771 14.631262 31.419498  
C 12.858384 11.989220 31.305061  
C 14.260270 11.681701 31.284670  
C 16.088287 13.750475 31.388065  
C 15.681664 15.137090 31.437979  
C 11.882252 13.840422 32.638313  
C 12.418973 12.485337 32.621754  
C 14.901708 11.929701 32.572620  
C 15.921863 12.937303 32.598080  
C 15.198477 15.754938 32.694195

C 13.756855 16.076344 32.695793  
Tc 14.029111 13.978821 33.132191  
Tc 14.024892 14.110592 35.718033  
Tc 15.856403 12.763481 34.629005  
Tc 11.765243 13.705866 34.677162  
Tc 15.677145 15.648482 34.760925  
Tc 12.998279 16.107157 34.605350  
Tc 13.533163 11.867723 34.429169  
Tc 14.252002 14.518866 38.122654  
Tc 14.371107 16.530537 36.482082  
Tc 11.999314 14.482715 37.133724  
Tc 12.365040 12.153219 36.764729  
Tc 14.663411 12.172542 37.248005  
Tc 16.374540 13.956983 36.612621

06H60C13Ru

H 13.136357 16.547020 20.657965  
H 11.454618 14.698687 20.631371  
H 15.799672 15.941975 20.640192  
H 16.554796 13.560293 20.609222  
H 14.723502 11.547226 20.585419  
H 12.283697 12.090092 20.590799  
C 16.168194 14.026248 21.516331  
C 15.758533 15.317067 21.533102  
C 12.924771 15.953453 21.548113  
C 12.013783 14.950923 21.533321  
C 12.891581 12.177281 21.492100

C 14.214241 11.883976 21.489017  
C 15.103525 15.789237 22.759680  
C 13.733433 16.094944 22.765877  
C 11.928713 14.114861 22.737961  
C 12.350523 12.776577 22.719091  
C 14.965139 12.196534 22.712610  
C 15.910796 13.233965 22.726015  
C 13.029173 15.888895 24.010250  
C 12.050306 14.817857 23.995079  
C 12.863775 12.241501 23.960482  
C 14.281600 11.928538 23.957033  
C 16.105160 13.923840 23.981691  
C 15.667871 15.307467 23.999624  
C 11.883259 14.093681 25.207607  
C 12.321678 12.710610 25.188450  
C 14.977398 12.129503 25.181452  
C 15.959279 13.197144 25.196659  
C 15.139116 15.788625 25.230154  
C 13.721197 16.098211 25.235428  
C 12.880318 12.225743 26.420078  
C 14.272602 11.921753 26.415962  
C 16.091448 13.900413 26.443146  
C 15.661510 15.259416 26.458408  
C 13.033512 15.833551 26.467066  
C 12.068523 14.784605 26.453930  
C 14.968134 12.120436 27.666382  
C 15.936359 13.174325 27.684860



C 15.124784 15.736446 27.711971  
C 13.728361 16.040340 27.716177  
C 11.907400 14.060090 27.694626  
C 12.338118 12.694945 27.674152  
C 16.100950 13.866207 28.929710  
C 15.671498 15.246933 28.942181  
C 13.030405 15.826782 28.947918  
C 12.055711 14.757792 28.936947  
C 12.861320 12.167174 28.897480  
C 14.278551 11.857062 28.893517  
C 15.150835 15.760446 30.172344  
C 13.721340 16.073431 30.174488  
C 11.897246 14.029235 30.162746  
C 12.307370 12.631228 30.138081  
C 14.979740 12.043530 30.132711  
C 15.941021 13.139467 30.157558  
C 13.022315 15.833503 31.407934  
C 12.077431 14.737911 31.399315  
C 12.851700 12.080245 31.343843  
C 14.257864 11.771750 31.340332  
C 16.076559 13.857959 31.395538  
C 15.683531 15.249530 31.406559  
C 11.951429 13.952148 32.636902  
C 12.423616 12.598726 32.635143  
C 14.866520 12.064051 32.629890  
C 15.861388 13.094316 32.636475  
C 15.162058 15.823826 32.664021

C 13.731422 16.139336 32.664158  
Ru 14.040005 14.131133 33.171421  
Ru 14.002759 14.021679 35.795731  
Ru 16.018684 12.973818 34.651241  
Ru 11.741358 13.879537 34.642326  
Ru 15.676021 15.595431 34.689602  
Ru 13.125423 16.138168 34.675919  
Ru 13.569097 11.951950 34.351898  
Ru 13.981071 13.986637 38.211708  
Ru 14.475590 16.284857 36.752174  
Ru 11.921257 15.105192 36.782581  
Ru 12.306499 12.461584 36.813889  
Ru 14.918064 11.912301 36.817364  
Ru 16.335592 14.176831 36.799503

06H60C13Rh

H 13.135282 16.505526 20.652906  
H 11.463708 14.651734 20.626854  
H 15.785085 15.946514 20.645248  
H 16.571205 13.575734 20.620945  
H 14.762434 11.562940 20.593428  
H 12.319214 12.074799 20.592945  
C 16.180401 14.039089 21.527651  
C 15.754001 15.325052 21.540810  
C 12.917318 15.921973 21.548090  
C 12.010074 14.915830 21.532928  
C 12.920994 12.164557 21.498024

C 14.246885 11.886497 21.498423  
C 15.093676 15.791561 22.765741  
C 13.716979 16.079576 22.768486  
C 11.922100 14.086639 22.740810  
C 12.364668 12.752246 22.723055  
C 14.991172 12.201779 22.723091  
C 15.933458 13.245270 22.738070  
C 13.012408 15.869274 24.009323  
C 12.037530 14.792431 23.994734  
C 12.882374 12.226810 23.962891  
C 14.305418 11.931790 23.962978  
C 16.116253 13.938577 23.991449  
C 15.660519 15.318075 24.005535  
C 11.879626 14.068837 25.209255  
C 12.333109 12.692538 25.189190  
C 14.996191 12.141088 25.189177  
C 15.971130 13.213301 25.207663  
C 15.119970 15.791211 25.234407  
C 13.700588 16.084816 25.235945  
C 12.894392 12.212558 26.421629  
C 14.290962 11.926096 26.421520  
C 16.092793 13.919132 26.455441  
C 15.648008 15.273798 26.466017  
C 13.013755 15.817987 26.468700  
C 12.056478 14.761590 26.457384  
C 14.981947 12.129424 27.672293  
C 15.940640 13.194632 27.696821

C 15.106204 15.750677 27.716316  
C 13.704458 16.036682 27.716852  
C 11.899652 14.036162 27.697357  
C 12.343678 12.673272 27.673313  
C 16.091516 13.888990 28.941719  
C 15.656010 15.269575 28.948090  
C 13.006746 15.815734 28.946795  
C 12.046489 14.732038 28.940853  
C 12.869464 12.146887 28.893406  
C 14.291989 11.853504 28.892529  
C 15.124644 15.776919 30.175459  
C 13.694509 16.070520 30.174070  
C 11.905286 13.997904 30.167599  
C 12.314732 12.604197 30.133781  
C 14.985027 12.050082 30.132078  
C 15.921479 13.160775 30.167761  
C 12.994880 15.829338 31.411022  
C 12.084455 14.701613 31.411293  
C 12.854275 12.036140 31.336535  
C 14.264158 11.743226 31.335060  
C 16.038818 13.875641 31.413654  
C 15.663589 15.273781 31.414162  
C 11.992126 13.901484 32.645088  
C 12.420080 12.538211 32.624866  
C 14.865274 12.026563 32.622795  
C 15.804454 13.102276 32.647491  
C 15.137388 15.873178 32.654789

C 13.714117 16.172150 32.652115  
Rh 14.041893 14.192581 33.180233  
Rh 13.997852 14.000838 35.672356  
Rh 16.154650 12.979453 34.612511  
Rh 11.614656 13.909568 34.607384  
Rh 15.715878 15.703909 34.626217  
Rh 13.096773 16.241198 34.618565  
Rh 13.563188 11.887274 34.209236  
Rh 13.971809 13.895440 38.288265  
Rh 14.457890 16.262482 36.821381  
Rh 12.110879 15.176198 36.828190  
Rh 12.379978 12.475221 36.806854  
Rh 14.887386 11.965899 36.812958  
Rh 16.188927 14.341132 36.839161

06H60C13Pd

H 13.168142 16.599815 20.710720  
H 11.490970 14.757038 20.645756  
H 15.784458 16.021673 20.697767  
H 16.543146 13.648731 20.621933  
H 14.751296 11.670410 20.550652  
H 12.311733 12.197618 20.559986  
C 16.176592 14.098694 21.545025  
C 15.763563 15.389565 21.586060  
C 12.942389 16.006046 21.596893  
C 12.029001 15.004364 21.561295  
C 12.911147 12.255037 21.469217

C 14.236238 11.968956 21.464193  
C 15.115558 15.842443 22.819296  
C 13.734202 16.144199 22.823280  
C 11.926605 14.155308 22.751442  
C 12.355667 12.812887 22.706938  
C 14.980302 12.242608 22.698088  
C 15.932339 13.283051 22.737556  
C 13.026091 15.908842 24.051220  
C 12.044024 14.834469 24.015083  
C 12.867854 12.258875 23.932251  
C 14.292444 11.951712 23.927589  
C 16.117920 13.948142 24.001459  
C 15.671221 15.333218 24.043095  
C 11.882861 14.085800 25.214684  
C 12.326784 12.708617 25.167818  
C 14.981359 12.135244 25.159210  
C 15.961432 13.198821 25.202110  
C 15.127883 15.779309 25.280415  
C 13.714542 16.085728 25.284184  
C 12.880947 12.197824 26.392393  
C 14.273919 11.897902 26.388767  
C 16.088234 13.874766 26.466953  
C 15.650264 15.231982 26.500786  
C 13.020189 15.804291 26.508209  
C 12.056059 14.752427 26.477661  
C 14.964285 12.061941 27.645264  
C 15.935136 13.124438 27.692738

C 15.109655 15.688416 27.754446  
C 13.710529 15.992245 27.756781  
C 11.887520 14.004216 27.700903  
C 12.327389 12.633612 27.650789  
C 16.081036 13.794901 28.947208  
C 15.653843 15.176774 28.975378  
C 13.006257 15.751300 28.979074  
C 12.039490 14.674115 28.953272  
C 12.846492 12.080524 28.857409  
C 14.268027 11.773034 28.855049  
C 15.114654 15.652586 30.207716  
C 13.696965 15.958266 30.209209  
C 11.901676 13.917738 30.168409  
C 12.303156 12.531142 30.105839  
C 14.952406 11.957006 30.103020  
C 15.892109 13.051191 30.164343  
C 12.989746 15.717242 31.450642  
C 12.072740 14.587539 31.436531  
C 12.824402 11.946076 31.313251  
C 14.239419 11.638597 31.312344  
C 16.016901 13.731259 31.433708  
C 15.655327 15.140182 31.450064  
C 11.924635 13.754890 32.644272  
C 12.339118 12.408798 32.573719  
C 14.874354 11.857185 32.572842  
C 15.809617 12.911196 32.642483  
C 15.130815 15.784628 32.654507

C 13.731108 16.086527 32.654984  
Pd 14.025154 14.069117 33.276638  
Pd 14.046170 14.215805 35.721169  
Pd 16.374598 13.304111 34.510780  
Pd 11.558887 14.345214 34.508022  
Pd 15.817447 15.969719 34.532017  
Pd 13.166626 16.544170 34.525307  
Pd 13.525602 11.755980 34.163368  
Pd 13.964920 13.856255 38.291374  
Pd 14.509680 16.432793 37.060173  
Pd 11.963335 15.295969 36.962891  
Pd 12.231753 12.484820 36.525856  
Pd 14.995773 11.895742 36.532513  
Pd 16.383875 14.356321 36.963715

06H60C13Ag

H 13.098341 16.687410 20.731905  
H 11.442499 14.830118 20.630037  
H 15.715488 16.159863 20.701214  
H 16.501539 13.798194 20.574322  
H 14.721359 11.797512 20.469648  
H 12.280189 12.292511 20.503008  
C 16.126434 14.223370 21.505947  
C 15.698309 15.508283 21.575830  
C 12.872259 16.080048 21.609064  
C 11.970222 15.068049 21.554314  
C 12.880189 12.333725 21.412735

C 14.209713 12.064361 21.395155  
C 15.051505 15.931382 22.820396  
C 13.664188 16.201221 22.836206  
C 11.868126 14.198567 22.729002  
C 12.326648 12.863936 22.660557  
C 14.960724 12.319798 22.627415  
C 15.890992 13.380288 22.682434  
C 12.958370 15.942074 24.061049  
C 11.996815 14.849969 24.005167  
C 12.848323 12.284741 23.868788  
C 14.277586 12.002054 23.852671  
C 16.081331 14.017908 23.957735  
C 15.611632 15.395969 24.031136  
C 11.850869 14.073720 25.191399  
C 12.310575 12.703443 25.116043  
C 14.968616 12.164032 25.086021  
C 15.930796 13.242458 25.142368  
C 15.066730 15.809335 25.278801  
C 13.649687 16.099281 25.294397  
C 12.872807 12.170857 26.327215  
C 14.270019 11.888042 26.311138  
C 16.055437 13.892970 26.421026  
C 15.598917 15.243151 26.488518  
C 12.965408 15.781898 26.517996  
C 12.020506 14.714686 26.467808  
C 14.970944 12.024800 27.564245  
C 15.916769 13.111785 27.626766  
C 15.069605 15.678111 27.754572  
C 13.658309 15.954884 27.769413  
C 11.856535 13.938720 27.676075  
C 12.322812 12.578518 27.594330  
C 16.085133 13.759491 28.892651  
C 15.619691 15.129868 28.952784  
C 12.957522 15.686114 28.985703  
C 12.012228 14.586526 28.940834  
C 12.851280 11.998863 28.787230  
C 14.277338 11.730821 28.771599  
C 15.063279 15.539071 30.204624  
C 13.653047 15.833602 30.219690  
C 11.893712 13.797783 30.137083  
C 12.320166 12.428395 30.043961  
C 14.971896 11.912511 30.017212  
C 15.912170 12.997065 30.095501  
C 12.976087 15.512421 31.465132  
C 12.044085 14.440269 31.434650  
C 12.885657 11.889506 31.258764  
C 14.280221 11.602164 31.237869  
C 16.028875 13.645694 31.395802  
C 15.622293 15.005431 31.433018  
C 11.751052 13.601028 32.608368  
C 12.354630 12.370360 32.485527  
C 15.018888 11.727201 32.462337  
C 15.866197 12.784809 32.554642  
C 15.127232 15.673493 32.625519

C 13.759684 15.812812 32.634556  
Ag 13.419752 14.421243 34.315605  
Ag 15.367583 13.499272 37.423904  
Ag 16.170837 13.242227 34.670341  
Ag 10.775306 14.007874 34.533089  
Ag 16.143793 16.025644 34.448479  
Ag 13.414510 17.138815 34.578121  
Ag 13.614934 11.639791 34.137932  
Ag 13.370525 14.637235 38.840439  
Ag 14.761906 16.170837 36.886894  
Ag 12.055740 15.531801 36.525146  
Ag 12.758671 12.855499 36.575413  
Ag 14.969125 11.038983 36.373905  
Ag 17.436834 15.023436 36.621811

06H60C13Cd

H 13.122680 16.582535 20.589119  
H 11.436394 14.740209 20.525723  
H 15.806021 16.015757 20.572138  
H 16.577999 13.641353 20.490877  
H 14.736134 11.639837 20.404099  
H 12.293312 12.156596 20.422585  
C 16.178017 14.081047 21.405579  
C 15.758862 15.368169 21.448648  
C 12.910906 15.970768 21.467148  
C 11.995731 14.971609 21.433161  
C 12.897825 12.222054 21.328079

C 14.223276 11.941396 21.318264  
C 15.092797 15.805199 22.681892  
C 13.717747 16.093266 22.689409  
C 11.909141 14.111914 22.620220  
C 12.345400 12.778174 22.569633  
C 14.971885 12.220431 22.550501  
C 15.918730 13.256029 22.593235  
C 13.012097 15.858717 23.927267  
C 12.029561 14.788039 23.889853  
C 12.865282 12.217246 23.793776  
C 14.286505 11.914314 23.783880  
C 16.108450 13.914767 23.863462  
C 15.660535 15.297735 23.909859  
C 11.871763 14.033446 25.084181  
C 12.321100 12.654346 25.031679  
C 14.979518 12.083968 25.014023  
C 15.957440 13.156432 25.057758  
C 15.122243 15.738971 25.149351  
C 13.702172 16.040529 25.157663  
C 12.882808 12.142138 26.250320  
C 14.273113 11.843619 26.241718  
C 16.078272 13.826750 26.323797  
C 15.639046 15.178607 26.368677  
C 13.015037 15.743179 26.384537  
C 12.057277 14.692273 26.346699  
C 14.968459 12.004529 27.501188  
C 15.934284 13.063290 27.547909

C 15.102475 15.628529 27.636135  
C 13.702994 15.928685 27.644840  
C 11.886354 13.933208 27.569059  
C 12.329775 12.570999 27.516186  
C 16.108454 13.726366 28.802860  
C 15.662153 15.113277 28.846783  
C 12.991480 15.684369 28.861530  
C 12.010021 14.606423 28.823429  
C 12.849962 12.009821 28.721741  
C 14.277496 11.704201 28.713814  
C 15.096740 15.531668 30.087185  
C 13.688849 15.829911 30.095123  
C 11.882978 13.841013 30.024324  
C 12.316651 12.470148 29.963652  
C 14.964172 11.902984 29.950916  
C 15.921082 12.976611 30.006578  
C 13.004416 15.532997 31.345995  
C 12.067278 14.487705 31.318052  
C 12.878862 11.967095 31.197758  
C 14.257210 11.671279 31.191505  
C 16.032141 13.642656 31.299479  
C 15.610728 14.982143 31.333303  
C 11.803791 13.658445 32.500217  
C 12.268734 12.370404 32.442757  
C 14.986030 11.799793 32.432289  
C 15.937237 12.781583 32.483418  
C 15.093135 15.634268 32.534290

C 13.751475 15.918917 32.540638  
Cd 14.004326 14.245284 34.826313  
Cd 13.978296 14.378513 38.516846  
Cd 16.807066 12.969296 34.481133  
Cd 10.963180 14.127769 34.467888  
Cd 16.172066 16.332636 34.423763  
Cd 12.968257 17.024950 34.386444  
Cd 13.483789 11.375845 34.108044  
Cd 14.364421 15.271615 41.241943  
Cd 15.920708 16.352064 37.305122  
Cd 12.933243 16.903191 37.258747  
Cd 11.437750 14.183647 37.219681  
Cd 13.526491 11.845755 36.927471  
Cd 16.299921 13.294692 37.214840

06H60C13Lu

H 13.323494 16.184841 20.506693  
H 11.751343 14.258932 20.500483  
H 15.944726 15.740867 20.691231  
H 16.831556 13.426962 20.868893  
H 15.155741 11.382344 20.860262  
H 12.711676 11.789580 20.675360  
C 16.390543 13.928545 21.731440  
C 15.905584 15.193334 21.633905  
C 13.062773 15.666348 21.430389  
C 12.203844 14.614530 21.427053  
C 13.235234 11.927417 21.622292

C 14.571597 11.704542 21.723343  
C 15.165381 15.718541 22.781769  
C 13.767836 15.954065 22.681482  
C 12.060614 13.864326 22.675152  
C 12.567707 12.540802 22.771156  
C 15.228334 12.100855 22.970299  
C 16.129061 13.199524 22.974014  
C 12.998618 15.784309 23.877600  
C 12.070910 14.649122 23.873812  
C 13.033322 12.118778 24.058306  
C 14.473912 11.878180 24.167587  
C 16.193798 13.976219 24.174606  
C 15.669345 15.339535 24.068615  
C 11.892867 13.992047 25.122437  
C 12.403123 12.646624 25.219593  
C 15.065382 12.208784 25.419981  
C 15.980546 13.324301 25.423643  
C 15.024557 15.847647 25.230522  
C 13.604659 16.082903 25.129440  
C 12.892067 12.259109 26.518023  
C 14.295818 12.028410 26.626993  
C 16.000769 14.105679 26.635395  
C 15.496413 15.436945 26.529545  
C 12.851767 15.869792 26.341625  
C 11.946671 14.768266 26.337572  
C 14.906840 12.318518 27.897209  
C 15.831344 13.440844 27.901663

C 14.873381 15.981154 27.703112  
C 13.442884 16.217026 27.605404  
C 11.714668 14.112798 27.595999  
C 12.227088 12.756618 27.689785  
C 15.877101 14.220296 29.092316  
C 15.364470 15.583242 28.976025  
C 12.678020 16.020763 28.790800  
C 11.750238 14.895549 28.786213  
C 12.705410 12.346744 28.962849  
C 14.144243 12.116968 29.082773  
C 14.690753 16.074234 30.137737  
C 13.292057 16.285259 30.059353  
C 11.608790 14.236462 30.051535  
C 12.086792 12.904679 30.124176  
C 14.736128 12.461255 30.346981  
C 15.651926 13.565261 30.353056  
C 12.530972 16.144001 31.319269  
C 11.595656 15.005716 31.314743  
C 12.536817 12.484558 31.445284  
C 13.967272 12.274504 31.577072  
C 15.682198 14.349998 31.586693  
C 15.189910 15.709110 31.458300  
C 11.128948 14.237562 32.462410  
C 11.655870 12.851364 32.544563  
C 14.674555 12.445038 32.870224  
C 15.641411 13.615789 32.876560  
C 14.654260 16.494486 32.560165



C 13.193745 16.740412 32.472710  
Lu 13.387440 14.478582 33.003887  
Lu 14.882687 13.239002 35.372662  
Lu 16.785948 11.700793 33.594769  
Lu 10.666018 13.391557 34.502396  
Lu 16.545025 15.574308 33.706509  
Lu 13.922299 17.353310 34.517765  
Lu 12.925410 11.168717 33.681282  
Lu 14.864292 13.239952 38.565628  
Lu 15.787760 15.929665 36.942650  
Lu 12.677180 15.042148 36.784363  
Lu 12.413507 11.815403 36.918900  
Lu 15.552704 10.546191 36.731880  
Lu 17.654402 13.117166 36.751823

06H60C13Hf

H 13.187848 16.325161 20.535004  
H 11.606563 14.396179 20.522558  
H 15.876881 15.901764 20.651060  
H 16.751423 13.565388 20.732635  
H 15.024430 11.460517 20.716877  
H 12.561468 11.852921 20.617016  
C 16.305965 14.037984 21.608925  
C 15.831629 15.306802 21.564268  
C 12.966957 15.763741 21.443796  
C 12.107710 14.715549 21.437222  
C 13.126358 12.003094 21.537729

C 14.463753 11.790364 21.592308  
C 15.102680 15.785894 22.743607  
C 13.713161 16.008320 22.684402  
C 12.007960 13.927117 22.670845  
C 12.503168 12.609457 22.719727  
C 15.152809 12.182449 22.826624  
C 16.045216 13.272051 22.833960  
C 12.971617 15.812104 23.904449  
C 12.048508 14.684303 23.896427  
C 13.003199 12.151778 23.990881  
C 14.438792 11.918883 24.049046  
C 16.155432 14.014043 24.064054  
C 15.642248 15.376812 24.015554  
C 11.887356 13.995765 25.130051  
C 12.395419 12.640125 25.180767  
C 15.070478 12.204817 25.290409  
C 15.988831 13.326414 25.297848  
C 15.034893 15.864887 25.205120  
C 13.604757 16.095827 25.145660  
C 12.924957 12.220871 26.451256  
C 14.331167 11.996676 26.506351  
C 16.035271 14.080562 26.520720  
C 15.539442 15.414971 26.474604  
C 12.888749 15.840457 26.367437  
C 11.986289 14.736883 26.359413  
C 14.968428 12.277285 27.769703  
C 15.877911 13.388316 27.777096

C 14.944332 15.922601 27.687887  
C 13.524096 16.142212 27.627995  
C 11.804949 14.043798 27.611801  
C 12.300764 12.694254 27.663445  
C 15.981993 14.135653 28.993073  
C 15.484791 15.512358 28.947485  
C 12.792593 15.922762 28.835388  
C 11.865618 14.792506 28.826910  
C 12.798404 12.233400 28.923431  
C 14.246478 12.018708 28.978371  
C 14.856777 15.987212 30.139355  
C 13.440777 16.183357 30.078629  
C 11.729283 14.094567 30.063337  
C 12.200569 12.745109 30.116596  
C 14.876021 12.336410 30.215527  
C 15.785652 13.445478 30.223183  
C 12.717966 15.965435 31.335894  
C 11.793111 14.834135 31.328743  
C 12.713730 12.308225 31.425591  
C 14.145698 12.090597 31.463892  
C 15.875334 14.199602 31.478600  
C 15.378420 15.560529 31.447220  
C 11.420572 14.091063 32.520988  
C 11.963004 12.704427 32.640793  
C 14.886930 12.206020 32.720863  
C 15.897141 13.440357 32.729267  
C 14.829084 16.212702 32.661018

C 13.365277 16.471462 32.534451  
Hf 13.741833 14.176862 32.645988  
Hf 14.195108 13.794861 35.729214  
Hf 16.334961 12.049359 34.351093  
Hf 11.473269 13.765929 34.622154  
Hf 16.328876 15.210356 34.231869  
Hf 13.686289 16.475033 34.636799  
Hf 13.238712 11.428304 34.216866  
Hf 14.491582 13.543463 38.547272  
Hf 15.326450 16.033888 37.081795  
Hf 12.448441 15.216941 37.313637  
Hf 12.222257 12.235585 37.067345  
Hf 14.925915 11.244790 36.746265  
Hf 16.837219 13.583158 36.754570

06H60C13Ta

H 13.202951 16.377007 20.571526  
H 11.567776 14.493687 20.568445  
H 15.842602 15.852767 20.631317  
H 16.662258 13.501101 20.693325  
H 14.905626 11.478976 20.690014  
H 12.461053 11.956580 20.626541  
C 16.258591 13.984663 21.583771  
C 15.813750 15.265614 21.550194  
C 12.975034 15.819415 21.480913  
C 12.085583 14.795330 21.479645  
C 13.037623 12.066545 21.545769

C 14.368239 11.806786 21.580744  
C 15.128676 15.765335 22.745399  
C 13.742406 16.033569 22.711721  
C 11.978508 14.003278 22.709749  
C 12.443208 12.670508 22.742756  
C 15.085813 12.155737 22.810581  
C 16.012428 13.222730 22.811771  
C 13.015865 15.848311 23.939276  
C 12.059872 14.745386 23.938961  
C 12.944043 12.183563 24.000589  
C 14.378816 11.908228 24.035339  
C 16.156931 13.955724 24.037912  
C 15.676540 15.334927 24.002655  
C 11.906206 14.050406 25.171394  
C 12.375912 12.682005 25.204723  
C 15.036227 12.174047 25.267757  
C 15.983412 13.267024 25.269123  
C 15.099129 15.830016 25.204515  
C 13.677904 16.103113 25.172359  
C 12.915595 12.238317 26.465900  
C 14.316259 11.974029 26.497543  
C 16.072931 14.011294 26.497746  
C 15.607638 15.358727 26.464096  
C 12.971430 15.861173 26.405304  
C 12.045452 14.780201 26.404585  
C 14.991652 12.214056 27.745155  
C 15.929411 13.311192 27.745918

C 15.041804 15.872049 27.685915  
C 13.626950 16.146214 27.661095  
C 11.864618 14.086497 27.658169  
C 12.332528 12.719841 27.690868  
C 16.062960 14.046766 28.962635  
C 15.586419 15.432009 28.928759  
C 12.904074 15.951934 28.879524  
C 11.958448 14.827806 28.871443  
C 12.853101 12.242840 28.934015  
C 14.290170 11.972486 28.964628  
C 14.984390 15.914276 30.126818  
C 13.585204 16.185722 30.112719  
C 11.842752 14.118104 30.101486  
C 12.295003 12.766137 30.139324  
C 14.969692 12.244271 30.192692  
C 15.893909 13.341840 30.190073  
C 12.896206 15.955331 31.397749  
C 11.957523 14.849842 31.367180  
C 12.838434 12.329472 31.431257  
C 14.264047 12.041430 31.454231  
C 15.996929 14.090288 31.439137  
C 15.500991 15.448432 31.409864  
C 11.537964 14.125808 32.552296  
C 12.103422 12.710210 32.655952  
C 14.981833 12.177679 32.726013  
C 15.991907 13.382645 32.719505  
C 15.042193 16.090023 32.656906

C 13.554267 16.386147 32.645760  
Ta 13.888541 14.162314 32.642422  
Ta 14.046056 13.816087 35.487499  
Ta 16.194061 12.334348 34.586597  
Ta 11.442226 13.765887 34.576187  
Ta 15.977839 15.222290 34.382656  
Ta 12.943728 16.149166 34.689922  
Ta 13.357044 11.684442 34.206860  
Ta 14.147868 13.679254 38.317333  
Ta 14.742933 15.986845 36.858437  
Ta 12.082676 14.969546 37.082718  
Ta 12.269397 12.272691 36.853794  
Ta 14.927733 11.582946 36.882980  
Ta 16.488806 13.836721 36.871540

06H60C13W

H 13.196010 16.488092 20.592516  
H 11.587484 14.577632 20.529530  
H 15.877938 16.026577 20.676020  
H 16.727703 13.676819 20.676901  
H 14.974271 11.583527 20.602695  
H 12.511591 12.015155 20.534924  
C 16.290293 14.127218 21.568552  
C 15.829900 15.401667 21.568592  
C 12.973956 15.898592 21.482811  
C 12.101620 14.862285 21.448315  
C 13.090434 12.137498 21.451195

C 14.423998 11.903833 21.488195  
C 15.113016 15.847639 22.768879  
C 13.730106 16.087875 22.726948  
C 12.004844 14.035063 22.657188  
C 12.486079 12.714960 22.659403  
C 15.124509 12.251328 22.732897  
C 16.025940 13.327191 22.770805  
C 12.993472 15.859979 23.948072  
C 12.060965 14.747775 23.911032  
C 12.981530 12.203646 23.914404  
C 14.415984 11.952606 23.954145  
C 16.152025 14.026317 24.027916  
C 15.654545 15.391223 24.027420  
C 11.890076 14.020153 25.122328  
C 12.386724 12.657033 25.121796  
C 15.061922 12.185214 25.196983  
C 15.996261 13.295712 25.237471  
C 15.064269 15.849255 25.236729  
C 13.635027 16.101433 25.194008  
C 12.926134 12.195380 26.373812  
C 14.328830 11.951356 26.412224  
C 16.056566 14.006406 26.483910  
C 15.569703 15.342152 26.482033  
C 12.924654 15.807050 26.405655  
C 12.010343 14.718241 26.372349  
C 14.979421 12.171604 27.681864  
C 15.900863 13.275112 27.723265

C 14.980936 15.808000 27.719313  
C 13.575196 16.047543 27.675552  
C 11.834209 13.988009 27.611788  
C 12.321365 12.633649 27.608482  
C 15.997663 13.976634 28.958904  
C 15.525461 15.353880 28.964945  
C 12.851367 15.809225 28.885828  
C 11.927632 14.683252 28.851391  
C 12.833719 12.127744 28.842903  
C 14.258912 11.885794 28.881372  
C 14.933934 15.831624 30.171885  
C 13.514735 16.057858 30.117674  
C 11.789167 13.948721 30.072298  
C 12.236925 12.566788 30.079569  
C 14.905211 12.115806 30.147943  
C 15.794976 13.258872 30.176468  
C 12.808427 15.788975 31.361301  
C 11.913534 14.662428 31.315884  
C 12.767412 12.057656 31.310596  
C 14.173685 11.813712 31.346567  
C 15.861204 13.982021 31.418602  
C 15.434916 15.356050 31.462467  
C 11.655397 13.900146 32.537292  
C 12.237820 12.541956 32.608055  
C 14.818715 12.066249 32.645596  
C 15.756056 13.154578 32.605244  
C 14.943487 16.001238 32.720062

C 13.424824 16.298256 32.588242  
W 13.790615 14.233823 33.194107  
W 13.804918 14.141735 36.226719  
W 15.721771 12.983746 34.643177  
W 11.585529 13.854002 34.570919  
W 15.700396 15.558807 34.852844  
W 13.317785 16.395786 34.642063  
W 13.240181 11.940139 34.560383  
W 14.939337 13.458257 38.473190  
W 15.459542 15.913359 37.281769  
W 11.780289 15.558812 36.344025  
W 12.689537 11.901407 36.955173  
W 15.056911 11.644288 36.916077  
W 16.777296 13.978575 36.889553

06H60C13Re

H 13.059188 16.611673 20.723318  
H 11.433048 14.724309 20.664574  
H 15.700815 16.142426 20.689686  
H 16.515570 13.784435 20.582075  
H 14.748331 11.723248 20.518860  
H 12.289456 12.170404 20.560886  
C 16.128378 14.213744 21.506680  
C 15.686930 15.493292 21.565853  
C 12.851290 16.013008 21.610558  
C 11.966368 14.985919 21.579088  
C 12.902509 12.256259 21.458603

C 14.235265 12.013649 21.436264  
C 15.032502 15.912469 22.809587  
C 13.647284 16.165457 22.830399  
C 11.890694 14.129349 22.766058  
C 12.349252 12.798962 22.706903  
C 14.984803 12.315971 22.661720  
C 15.905501 13.380110 22.694469  
C 12.956838 15.903418 24.067888  
C 12.006951 14.803128 24.035168  
C 12.887314 12.247959 23.923126  
C 14.323605 11.985760 23.898359  
C 16.094896 14.035165 23.964825  
C 15.616607 15.408712 24.026430  
C 11.873691 14.042661 25.231146  
C 12.352555 12.676566 25.167181  
C 15.023124 12.174236 25.119373  
C 15.974720 13.267005 25.156794  
C 15.076896 15.827265 25.272053  
C 13.652124 16.095140 25.294422  
C 12.939829 12.174701 26.381701  
C 14.340465 11.909530 26.359116  
C 16.099882 13.932995 26.426449  
C 15.623845 15.272918 26.479664  
C 12.981294 15.776574 26.523792  
C 12.048061 14.703623 26.496338  
C 15.049999 12.070516 27.603045  
C 15.997598 13.162074 27.648706

C 15.087151 15.699966 27.747559  
C 13.682229 15.969700 27.773239  
C 11.907144 13.940296 27.721632  
C 12.391215 12.585035 27.647772  
C 16.147076 13.819363 28.902800  
C 15.668532 15.191133 28.950266  
C 12.996346 15.710524 29.001347  
C 12.049585 14.602208 28.976374  
C 12.954297 12.045217 28.840841  
C 14.373579 11.769608 28.820232  
C 15.120685 15.639814 30.183924  
C 13.712983 15.897298 30.211821  
C 11.962239 13.835522 30.184992  
C 12.404951 12.459990 30.105915  
C 15.077123 11.938240 30.075035  
C 15.996215 13.064142 30.122646  
C 13.048502 15.632160 31.492279  
C 12.119993 14.509458 31.462393  
C 12.968752 11.885395 31.281967  
C 14.371794 11.607002 31.268894  
C 16.110186 13.755280 31.377151  
C 15.671945 15.135601 31.429272  
C 11.915460 13.686923 32.677120  
C 12.531397 12.360075 32.589333  
C 14.958698 11.903420 32.579784  
C 15.913492 12.972880 32.596584  
C 15.254395 15.812676 32.670616

C 13.745405 16.161144 32.693512  
Re 14.038042 14.065933 33.100594  
Re 13.919317 14.071670 35.691231  
Re 15.866947 12.898323 34.660702  
Re 11.603299 13.826536 34.769451  
Re 15.895750 15.668550 34.671825  
Re 13.391665 16.358835 34.747768  
Re 13.520679 11.877371 34.378307  
Re 13.164770 14.356215 38.047394  
Re 14.759240 16.182148 36.862690  
Re 11.769522 15.619812 36.401917  
Re 12.354420 12.379953 36.641327  
Re 14.861073 12.578108 37.507874  
Re 16.466434 14.221843 36.692459

06H60C13Os

H 13.141205 16.596306 20.708195  
H 11.447667 14.759088 20.668985  
H 15.815650 16.008745 20.684334  
H 16.557455 13.621830 20.611752  
H 14.694989 11.602058 20.564629  
H 12.253310 12.144841 20.595379  
C 16.166273 14.073225 21.524361  
C 15.765137 15.365677 21.563797  
C 12.927290 15.996463 21.593349  
C 12.009448 15.000508 21.572088  
C 12.870868 12.229095 21.490393

C 14.192088 11.934106 21.473587  
C 15.107905 15.815845 22.797478  
C 13.739358 16.120058 22.810556  
C 11.923242 14.152781 22.767786  
C 12.339434 12.816438 22.728672  
C 14.949957 12.233561 22.695934  
C 15.901294 13.261950 22.720554  
C 13.037422 15.899399 24.055454  
C 12.052839 14.839071 24.034164  
C 12.856592 12.263510 23.960606  
C 14.271657 11.947701 23.941710  
C 16.104507 13.929008 23.987926  
C 15.672823 15.310996 24.029301  
C 11.884205 14.100812 25.240383  
C 12.320414 12.716643 25.197353  
C 14.975639 12.119614 25.164335  
C 15.964823 13.181241 25.191578  
C 15.148256 15.773470 25.267466  
C 13.731846 16.094147 25.280891  
C 12.883479 12.212660 26.417465  
C 14.275311 11.897286 26.398912  
C 16.105904 13.862223 26.448317  
C 15.670591 15.219694 26.482157  
C 13.042857 15.823679 26.507994  
C 12.074087 14.777334 26.492151  
C 14.980931 12.067631 27.644730  
C 15.956960 13.113107 27.678181

C 15.133288 15.674445 27.740906  
C 13.746625 16.006392 27.755196  
C 11.923499 14.035878 27.727318  
C 12.352139 12.672861 27.678207  
C 16.124327 13.785465 28.934143  
C 15.684673 15.163322 28.960129  
C 13.050956 15.787733 28.989256  
C 12.077696 14.716859 28.980392  
C 12.885519 12.130228 28.890579  
C 14.291597 11.796354 28.871014  
C 15.176929 15.678390 30.189711  
C 13.753281 16.013577 30.209156  
C 11.944424 13.977625 30.203766  
C 12.350446 12.580192 30.145319  
C 15.004362 11.946158 30.110609  
C 15.956347 13.047258 30.154350  
C 13.066189 15.777567 31.457527  
C 12.140835 14.662993 31.456999  
C 12.903902 11.993055 31.320951  
C 14.283820 11.616693 31.299507  
C 16.051600 13.755440 31.399281  
C 15.711537 15.155544 31.414930  
C 12.029964 13.847507 32.699371  
C 12.526697 12.493011 32.633007  
C 14.851503 11.889533 32.617970  
C 15.757110 13.013843 32.635101  
C 15.243519 15.770983 32.673515

C 13.801782 16.179863 32.690269  
Os 14.050116 14.165214 33.345451  
Os 14.131093 14.063268 35.891365  
Os 16.056335 12.862874 34.720665  
Os 11.720892 13.591610 34.759155  
Os 15.850607 15.553988 34.709400  
Os 13.409846 16.494808 34.727364  
Os 13.715921 11.827875 34.345169  
Os 12.642126 14.949269 37.712410  
Os 14.603780 16.288700 36.847023  
Os 11.465513 15.648778 35.775757  
Os 12.430289 12.587631 36.959785  
Os 14.715414 11.800568 36.728683  
Os 16.569784 14.114841 36.646381

06H60C13Ir

H 13.132396 16.552410 20.663191  
H 11.456754 14.699979 20.627836  
H 15.794431 15.966061 20.650082  
H 16.567646 13.591028 20.610867  
H 14.744372 11.581743 20.569132  
H 12.302462 12.109794 20.573254  
C 16.177977 14.050639 21.519678  
C 15.759232 15.338581 21.541172  
C 12.919597 15.957676 21.552170  
C 12.011392 14.952529 21.532328  
C 12.906188 12.190465 21.477697



C 14.230686 11.904288 21.475517  
C 15.097139 15.799714 22.767365  
C 13.724584 16.098528 22.771782  
C 11.925653 14.112996 22.733471  
C 12.357759 12.776606 22.707283  
C 14.977531 12.210312 22.702032  
C 15.921676 13.250655 22.723619  
C 13.018688 15.885679 24.013746  
C 12.044317 14.810185 23.993156  
C 12.872120 12.239528 23.945004  
C 14.292550 11.934127 23.942554  
C 16.107714 13.933460 23.983025  
C 15.660051 15.314488 24.006128  
C 11.880860 14.079719 25.202827  
C 12.326734 12.700575 25.174444  
C 14.985283 12.130397 25.169388  
C 15.962307 13.200359 25.194292  
C 15.125458 15.785547 25.237251  
C 13.707583 16.091337 25.241280  
C 12.884798 12.209619 26.403528  
C 14.279808 11.911672 26.401386  
C 16.088804 13.897406 26.445509  
C 15.650233 15.253343 26.463634  
C 13.019243 15.818493 26.471056  
C 12.059505 14.764963 26.453926  
C 14.972521 12.104301 27.652077  
C 15.936944 13.163608 27.683420  
C 15.111609 15.722844 27.716940  
C 13.712928 16.022957 27.720097  
C 11.899699 14.032722 27.690521  
C 12.338004 12.668953 27.656769  
C 16.091406 13.849072 28.933363  
C 15.657174 15.229353 28.944006  
C 13.014888 15.798707 28.947758  
C 12.047405 14.721832 28.938229  
C 12.862240 12.136073 28.875614  
C 14.280537 11.832076 28.874022  
C 15.134041 15.736567 30.173069  
C 13.703691 16.043814 30.174616  
C 11.900010 13.986204 30.162615  
C 12.305122 12.588146 30.117868  
C 14.976719 12.013433 30.115850  
C 15.922994 13.118818 30.159784  
C 12.999241 15.810118 31.407579  
C 12.081935 14.682462 31.409889  
C 12.847461 12.013741 31.310339  
C 14.248148 11.712571 31.310240  
C 16.044786 13.827474 31.408756  
C 15.675972 15.232075 31.407148  
C 11.967598 13.875657 32.658913  
C 12.424751 12.503614 32.612835  
C 14.833304 11.985744 32.613476  
C 15.816534 13.045615 32.659382  
C 15.167095 15.871413 32.653175

C 13.723402 16.185389 32.652493  
Ir 14.049339 14.195898 33.178650  
Ir 14.009016 14.032946 35.691147  
Ir 16.157953 13.031938 34.689564  
Ir 11.640922 13.999516 34.686176  
Ir 15.733362 15.712480 34.665668  
Ir 13.130132 16.271233 34.660919  
Ir 13.551577 11.888688 34.230824  
Ir 13.992624 13.971927 38.313560  
Ir 14.463618 16.160666 36.917259  
Ir 12.082982 15.234915 36.882202  
Ir 12.356791 12.542231 36.806244  
Ir 14.903982 11.997508 36.809036  
Ir 16.256014 14.339802 36.887295

06H60C13Pt

H 13.234693 16.597239 20.738771  
H 11.567572 14.742694 20.640202  
H 15.841045 16.010475 20.768457  
H 16.614998 13.642430 20.709839  
H 14.844980 11.648473 20.614143  
H 12.407944 12.179191 20.568750  
C 16.231457 14.091818 21.626257  
C 15.810352 15.380689 21.658031  
C 12.994431 15.999298 21.618258  
C 12.088291 14.992486 21.565123  
C 12.986985 12.239104 21.490759

C 14.310905 11.950596 21.515587  
C 15.140547 15.832159 22.880383  
C 13.760340 16.135248 22.861263  
C 11.968281 14.139847 22.753120  
C 12.405377 12.800991 22.715120  
C 15.030210 12.231033 22.762625  
C 15.978086 13.276276 22.817509  
C 13.032735 15.895509 24.077095  
C 12.051534 14.816866 24.022785  
C 12.893859 12.247899 23.952637  
C 14.318687 11.943268 23.977539  
C 16.136253 13.944265 24.082663  
C 15.681019 15.328133 24.114573  
C 11.871982 14.066847 25.216747  
C 12.323363 12.690907 25.176397  
C 14.982431 12.131593 25.221645  
C 15.959419 13.198074 25.282373  
C 15.115869 15.772502 25.343855  
C 13.700270 16.070377 25.320515  
C 12.859450 12.185989 26.411293  
C 14.250613 11.893849 26.433466  
C 16.058969 13.875415 26.548920  
C 15.618126 15.229809 26.577475  
C 12.985329 15.781971 26.533157  
C 12.023019 14.731581 26.487160  
C 14.919477 12.059728 27.702618  
C 15.885367 13.120310 27.771387

C 15.050707 15.680330 27.826515  
C 13.647533 15.977326 27.796824  
C 11.825634 13.983183 27.709002  
C 12.274904 12.610314 27.662798  
C 16.020119 13.784384 29.035357  
C 15.575453 15.169525 29.057135  
C 12.912768 15.736063 28.997240  
C 11.940833 14.656893 28.962580  
C 12.776949 12.067059 28.873432  
C 14.205694 11.759829 28.898964  
C 14.987791 15.614847 30.277924  
C 13.580956 15.909926 30.238218  
C 11.798534 13.902127 30.178467  
C 12.211302 12.531130 30.109959  
C 14.863944 11.954376 30.151001  
C 15.809295 13.034381 30.239170  
C 12.846787 15.662757 31.462437  
C 11.932251 14.565011 31.469744  
C 12.716292 11.982140 31.330978  
C 14.118836 11.667494 31.354914  
C 15.873782 13.719563 31.524883  
C 15.456575 15.061209 31.531826  
C 11.768904 13.771446 32.697727  
C 12.221200 12.443871 32.588383  
C 14.688588 11.879247 32.630402  
C 15.680653 12.917326 32.766403  
C 14.898597 15.646290 32.771927

C 13.545516 16.117184 32.647686  
Pt 14.633479 14.138085 34.237843  
Pt 13.776702 13.560816 36.933258  
Pt 17.112038 12.442124 34.058563  
Pt 11.839293 14.475908 34.565147  
Pt 16.136671 16.370432 34.205063  
Pt 12.495824 16.906975 34.026257  
Pt 13.394583 11.878603 34.148479  
Pt 15.482213 15.277474 37.766529  
Pt 14.149129 16.327755 35.885445  
Pt 12.018903 15.457737 36.980476  
Pt 11.714854 12.352706 36.036564  
Pt 15.418354 11.851291 35.993717  
Pt 16.713291 14.279922 35.812271

06H60C13Au

H 13.177926 16.823833 20.747614  
H 11.485861 14.994176 20.600660  
H 15.810917 16.234768 20.714930  
H 16.561119 13.861876 20.529575  
H 14.737935 11.886191 20.364925  
H 12.303412 12.430578 20.400070  
C 16.183611 14.268906 21.468012  
C 15.776052 15.557660 21.569012  
C 12.949688 16.187860 21.603441  
C 12.030499 15.194533 21.523769  
C 12.902792 12.443756 21.310890

C 14.226039 12.148306 21.291187  
C 15.119099 15.953268 22.819201  
C 13.744479 16.259621 22.834757  
C 11.928315 14.291727 22.675371  
C 12.350818 12.953053 22.571447  
C 14.971708 12.368940 22.535345  
C 15.926213 13.401164 22.622593  
C 13.035392 15.976561 24.057461  
C 12.048633 14.914059 23.971272  
C 12.862246 12.342540 23.773239  
C 14.279451 12.024949 23.752146  
C 16.109314 14.009434 23.917763  
C 15.674541 15.390668 24.024851  
C 11.880960 14.111561 25.136244  
C 12.316734 12.733866 25.029148  
C 14.969123 12.145761 24.991835  
C 15.951561 13.206130 25.083441  
C 15.138000 15.789752 25.282200  
C 13.723323 16.102882 25.297632  
C 12.866600 12.164268 26.227783  
C 14.259690 11.855899 26.205147  
C 16.082916 13.824566 26.373278  
C 15.654950 15.181892 26.476437  
C 13.029630 15.765337 26.506969  
C 12.060435 14.720184 26.425617  
C 14.953302 11.966988 27.465420  
C 15.926380 13.016767 27.561750

C 15.116694 15.581520 27.754299  
C 13.719600 15.893547 27.766777  
C 11.892893 13.915866 27.615440  
C 12.318619 12.549013 27.508060  
C 16.090900 13.629740 28.848461  
C 15.660791 15.006552 28.948996  
C 13.011644 15.599106 28.973949  
C 12.030498 14.539806 28.898193  
C 12.847670 11.952976 28.697981  
C 14.258973 11.631541 28.668261  
C 15.111154 15.391431 30.207590  
C 13.703215 15.716905 30.215439  
C 11.888682 13.740067 30.078102  
C 12.312417 12.365450 29.965738  
C 14.961134 11.755406 29.911587  
C 15.913721 12.832834 30.023779  
C 12.987481 15.429263 31.438557  
C 12.043555 14.364636 31.373301  
C 12.876112 11.800507 31.157484  
C 14.250219 11.459867 31.117836  
C 16.062681 13.447983 31.335014  
C 15.628626 14.801445 31.428486  
C 11.873895 13.520166 32.559433  
C 12.406633 12.268194 32.438591  
C 14.935429 11.635610 32.361286  
C 15.960009 12.524238 32.470387  
C 15.060054 15.381855 32.636032

C 13.750596 15.743256 32.638474  
Au 15.182777 16.165699 37.049976  
Au 14.082841 13.610507 38.024704  
Au 16.537560 12.823377 34.379646  
Au 11.592672 14.224854 34.439362  
Au 15.825143 15.413313 34.532990  
Au 13.125669 16.454033 34.448540  
Au 13.630177 11.676049 34.021393  
Au 13.431720 16.007689 39.133865  
Au 12.988529 17.711472 36.828098  
Au 11.967220 15.097010 36.900269  
Au 12.374172 12.406336 36.267529  
Au 15.010860 11.520831 36.351776  
Au 16.567097 13.905771 36.841896

06H60C13Hg

H 13.169163 16.367476 20.529783  
H 11.525440 14.479939 20.503336  
H 15.878002 15.838583 20.547493  
H 16.706556 13.477447 20.533127  
H 14.896924 11.400984 20.500683  
H 12.442086 11.878925 20.485577  
C 16.280256 13.930963 21.428686  
C 15.831385 15.207989 21.436098  
C 12.969442 15.766855 21.417923  
C 12.080823 14.745887 21.403673  
C 13.044027 11.996530 21.387344

C 14.372763 11.737667 21.395807  
C 15.138081 15.658224 22.651644  
C 13.765852 15.930223 22.642460  
C 12.014295 13.913834 22.613581  
C 12.479424 12.594484 22.604998  
C 15.105741 12.081680 22.621588  
C 16.023354 13.134956 22.637642  
C 13.054818 15.718098 23.885799  
C 12.105754 14.628513 23.870312  
C 13.000567 12.082697 23.854742  
C 14.416643 11.800169 23.865660  
C 16.183050 13.834612 23.897297  
C 15.703660 15.195861 23.901510  
C 11.946011 13.907362 25.086452  
C 12.424414 12.535204 25.075670  
C 15.098125 12.008662 25.097347  
C 16.052345 13.106739 25.115122  
C 15.155588 15.676508 25.123285  
C 13.730820 15.959494 25.115040  
C 12.980736 12.065307 26.306580  
C 14.380282 11.793099 26.319300  
C 16.147409 13.820438 26.353596  
C 15.681529 15.167433 26.354748  
C 13.042672 15.683865 26.340918  
C 12.105074 14.608644 26.326416  
C 15.047812 12.025438 27.581617  
C 15.986998 13.099010 27.602127

C 15.125210 15.643141 27.602413  
C 13.728472 15.908543 27.593637  
C 11.961039 13.879953 27.565685  
C 12.408437 12.529415 27.552353  
C 16.140877 13.801580 28.844242  
C 15.688343 15.182997 28.843317  
C 13.019946 15.677695 28.823490  
C 12.075285 14.591523 28.809771  
C 12.919196 12.010295 28.787476  
C 14.347208 11.741690 28.801346  
C 15.119925 15.658325 30.060034  
C 13.693499 15.913038 30.058126  
C 11.925974 13.871035 30.032187  
C 12.353330 12.487488 30.007576  
C 15.028715 11.970813 30.036407  
C 15.976608 13.067049 30.062784  
C 12.963907 15.679214 31.301434  
C 12.051334 14.600768 31.289955  
C 12.918666 12.012438 31.254967  
C 14.312165 11.732305 31.269842  
C 16.067059 13.778721 31.322018  
C 15.622757 15.127132 31.317072  
C 11.794679 13.752280 32.460796  
C 12.315866 12.564921 32.412865  
C 15.029150 11.998573 32.482830  
C 15.878008 13.001112 32.515396  
C 14.961905 15.652133 32.455036

C 13.731140 16.074390 32.488430  
Hg 15.942374 14.355929 34.392666  
Hg 13.771850 14.445723 36.504250  
Hg 18.137098 11.486699 35.157642  
Hg 10.850622 14.770659 34.308983  
Hg 15.951347 17.749359 34.925747  
Hg 12.761628 17.106506 34.389839  
Hg 13.733168 11.401951 34.305943  
Hg 14.366537 14.146962 40.112160  
Hg 14.170917 17.330153 37.982864  
Hg 10.932393 15.659290 37.438972  
Hg 11.742526 12.073318 36.479713  
Hg 15.217543 11.491255 37.352173  
Hg 17.134895 14.744053 37.257133

05H60C13Sc

H 12.940109 12.701282 20.089399  
H 15.220333 11.886325 20.241776  
H 16.436476 13.958655 20.283207  
H 14.970218 15.879453 20.179722  
H 12.717659 15.115249 20.061085  
C 16.345409 13.973801 21.371183  
C 15.904825 15.165052 22.025501  
C 14.900088 15.846202 21.268770  
C 13.618245 15.907307 21.906839  
C 12.709379 15.082369 21.152092  
C 12.357548 13.870699 21.834097

C 12.881804 12.716682 21.179571  
C 13.824025 11.970213 21.941505  
C 15.128233 11.964046 21.326385  
C 16.070049 12.765640 22.074837  
C 15.816643 15.178337 23.454935  
C 14.776618 15.937561 24.110170  
C 13.550199 15.896530 23.321466  
C 12.507169 15.121185 23.993322  
C 12.293041 13.887573 23.265146  
C 12.657722 12.709399 24.019302  
C 13.745264 12.009320 23.367619  
C 14.960049 11.990779 24.169537  
C 15.965898 12.804421 23.492290  
C 16.255283 14.031803 24.215527  
C 14.693211 15.938051 25.514364  
C 13.388496 15.924078 26.166721  
C 12.445643 15.117093 25.395235  
C 12.069145 13.900926 26.109528  
C 12.573525 12.721703 25.427103  
C 13.556250 11.995783 26.212660  
C 14.866497 12.033217 25.565821  
C 15.817790 12.833755 26.337183  
C 16.166924 14.050124 25.621439  
C 15.706157 15.249956 26.304428  
C 13.314920 15.920628 27.566994  
C 12.280674 15.139834 28.241718  
C 11.992377 13.911817 27.511250

C 12.382204 12.727925 28.266163  
C 13.474962 12.017197 27.612286  
C 14.696766 12.067760 28.408972  
C 15.722674 12.857761 27.736015  
C 16.023506 14.084965 28.461870  
C 15.626150 15.265425 27.704914  
C 14.538265 15.982561 28.360298  
C 12.204887 15.147213 29.641619  
C 11.816881 13.932323 30.351370  
C 12.302696 12.740150 29.667946  
C 13.304447 12.028963 30.453779  
C 14.612502 12.088289 29.807674  
C 15.561800 12.884823 30.573439  
C 15.942049 14.098236 29.862612  
C 15.478183 15.302384 30.545792  
C 14.457386 15.990388 29.760992  
C 13.151672 15.949340 30.408018  
C 11.717386 13.945779 31.764679  
C 12.074518 12.715673 32.524826  
C 13.218898 12.028563 31.866665  
C 14.474075 12.043844 32.669792  
C 15.493386 12.887918 31.990164  
C 15.857347 14.127139 32.727318  
C 15.409809 15.324032 31.959284  
C 14.316327 16.092279 32.620548  
C 13.064917 15.978258 31.821756  
C 11.972166 15.220006 32.495205

Sc 14.418482 16.922474 34.580379  
Sc 11.163197 15.742415 34.393345  
Sc 13.697307 14.047722 33.325119  
Sc 12.529660 16.623711 37.196732  
Sc 16.551506 14.189001 34.745209  
Sc 15.524057 15.758328 37.384659  
Sc 13.498807 14.109609 36.075695  
Sc 11.268269 12.273995 34.448421  
Sc 10.778481 14.039083 37.124664  
Sc 14.602039 11.302554 34.668053  
Sc 13.328169 14.146075 38.978794  
Sc 15.628525 12.636950 37.427048  
Sc 12.691739 11.572041 37.268166

05H60C13Ti

H 13.066518 12.464780 20.191429  
H 15.468792 12.223009 20.324543  
H 16.445452 14.430210 20.376118  
H 14.633952 16.024944 20.277109  
H 12.539365 14.819281 20.163698  
C 16.322090 14.416653 21.460392  
C 15.688762 15.513783 22.130476  
C 14.567115 15.967126 21.365017  
C 13.300425 15.754787 21.998188  
C 12.538987 14.794230 21.254885  
C 12.332094 13.557560 21.948313  
C 13.046903 12.510069 21.281727

C 14.130647 11.966607 22.045094  
C 15.377486 12.276272 21.410870  
C 16.208368 13.170861 22.160278  
C 15.595940 15.496175 23.551949  
C 14.418834 16.035036 24.211813  
C 13.236470 15.733832 23.421223  
C 12.327185 14.821970 24.096180  
C 12.280519 13.563164 23.369896  
C 12.847951 12.459314 24.127054  
C 14.056168 11.991691 23.468582  
C 15.252872 12.218713 24.260454  
C 16.106363 13.181380 23.580917  
C 16.228765 14.431549 24.313868  
C 14.339772 16.021402 25.613384  
C 13.061582 15.766646 26.267000  
C 12.264272 14.816849 25.497805  
C 12.085237 13.558571 26.214472  
C 12.778945 12.473071 25.529427  
C 13.892406 11.958592 26.317993  
C 15.165563 12.233541 25.662340  
C 15.978505 13.168426 26.433353  
C 16.135937 14.428817 25.714083  
C 15.462545 15.525187 26.401039  
C 12.989595 15.762400 27.667534  
C 12.112867 14.819195 28.346811  
C 12.015059 13.563282 27.614639  
C 12.623104 12.482840 28.378672



C 13.814248 11.968680 27.718643  
C 15.003340 12.241803 28.512224  
C 15.892668 13.174271 27.833731  
C 15.975547 14.432293 28.564449  
C 15.380623 15.521885 27.801769  
C 14.182841 16.023081 28.459690  
C 12.010330 14.830728 29.750023  
C 11.819292 13.558678 30.455902  
C 12.527059 12.465563 29.783051  
C 13.647184 11.931731 30.558613  
C 14.935700 12.219926 29.917353  
C 15.756618 13.162739 30.677023  
C 15.919330 14.437825 29.969109  
C 15.236079 15.544430 30.643042  
C 14.104740 16.049511 29.863096  
C 12.810472 15.794775 30.506794  
C 11.693916 13.552443 31.859213  
C 12.289465 12.383196 32.636627  
C 13.562427 11.885942 31.965174  
C 14.829246 12.128985 32.780582  
C 15.720043 13.145899 32.089046  
C 15.857029 14.466104 32.834755  
C 15.188850 15.587309 32.055363  
C 13.956485 16.170685 32.723404  
C 12.705259 15.842447 31.913912  
C 11.747514 14.885601 32.602581  
Ti 15.258299 15.807018 34.349464

Ti 12.456743 16.101604 34.178600  
Ti 13.738809 14.010524 32.742992  
Ti 13.721894 16.300001 36.690224  
Ti 15.854847 13.053678 34.385727  
Ti 15.744825 14.494039 36.808292  
Ti 13.587029 14.022639 35.505371  
Ti 11.303544 13.508365 34.111084  
Ti 11.402449 14.928927 36.570816  
Ti 13.421700 11.619823 34.238129  
Ti 13.406699 14.011402 38.121693  
Ti 14.640395 12.025020 36.759388  
Ti 11.973047 12.308618 36.614433

05H60C13V

H 12.856409 12.668150 20.125257  
H 15.183770 12.019453 20.259377  
H 16.498005 14.045205 20.324942  
H 15.010883 15.940988 20.226238  
H 12.756798 15.084438 20.105251  
C 16.379959 14.049668 21.410011  
C 15.955257 15.239647 22.080479  
C 14.932489 15.887941 21.313618  
C 13.645511 15.882271 21.944820  
C 12.743666 15.059377 21.196463  
C 12.329283 13.872631 21.881590  
C 12.845007 12.713181 21.215761  
C 13.815270 11.984424 21.976116

C 15.099353 12.084660 21.345602  
C 16.057732 12.837758 22.099665  
C 15.851549 15.230282 23.502623  
C 14.788723 15.967288 24.161860  
C 13.574225 15.865919 23.367456  
C 12.529789 15.111071 24.037968  
C 12.276212 13.882452 23.306616  
C 12.635274 12.692484 24.056477  
C 13.742285 12.018129 23.397633  
C 14.960321 12.042274 24.191677  
C 15.955932 12.859549 23.521362  
C 16.282822 14.068080 24.256336  
C 14.703808 15.957033 25.565409  
C 13.397619 15.924352 26.213634  
C 12.466967 15.110126 25.442316  
C 12.076377 13.898127 26.149311  
C 12.570098 12.712771 25.460119  
C 13.571841 12.000540 26.242767  
C 14.874447 12.068338 25.593954  
C 15.829997 12.849988 26.366716  
C 16.184065 14.073767 25.660114  
C 15.715958 15.264902 26.353302  
C 13.322031 15.919750 27.613949  
C 12.296366 15.131407 28.282175  
C 12.008770 13.905634 27.552109  
C 12.398419 12.716288 28.300909  
C 13.495029 12.017076 27.644512

C 14.714302 12.064962 28.437967  
C 15.737500 12.858915 27.768229  
C 16.026148 14.079465 28.506283  
C 15.623970 15.260913 27.757563  
C 14.540727 15.982907 28.414341  
C 12.214220 15.137334 29.686468  
C 11.823751 13.916533 30.376167  
C 12.317360 12.721532 29.701294  
C 13.326971 12.015661 30.489254  
C 14.631809 12.071596 29.843044  
C 15.581466 12.856548 30.619274  
C 15.939769 14.081893 29.911005  
C 15.460464 15.275853 30.590294  
C 14.454594 15.986025 29.815613  
C 13.145159 15.951967 30.468359  
C 11.744244 13.922534 31.783352  
C 12.126190 12.728012 32.560997  
C 13.247791 12.021788 31.902317  
C 14.469264 12.060469 32.746872  
C 15.499571 12.861034 32.033936  
C 15.813416 14.101638 32.776951  
C 15.378011 15.281545 31.999773  
C 14.298420 16.017670 32.698128  
C 13.061284 15.961250 31.880970  
C 12.030579 15.150412 32.553185  
V 14.537476 16.158535 34.719578  
V 11.455677 14.837320 34.489059

V 13.717331 14.019228 33.157799  
V 12.479383 15.943627 36.859947  
V 15.839080 14.231028 34.778366  
V 15.202826 15.271883 37.091759  
V 13.418006 14.301274 35.625809  
V 11.916498 12.510434 34.543304  
V 11.114457 13.698515 36.645164  
V 14.381721 12.162221 34.801785  
V 13.007937 14.342843 38.143990  
V 15.212478 13.256880 37.098141  
V 12.891837 12.240337 36.977184

05H60C13Cr

H 12.856234 12.642109 20.142231  
H 15.169547 11.973042 20.286724  
H 16.498779 13.983885 20.339466  
H 15.016421 15.883738 20.226093  
H 12.748600 15.053842 20.103470  
C 16.377518 13.995764 21.423954  
C 15.951394 15.190695 22.086212  
C 14.934558 15.837879 21.313423  
C 13.646136 15.851423 21.940758  
C 12.736955 15.032231 21.194525  
C 12.317335 13.851166 21.888990  
C 12.837945 12.690822 21.232533  
C 13.799562 11.960962 22.000374  
C 15.084217 12.043633 21.372501

C 16.048100 12.790766 22.123421  
C 15.844333 15.193039 23.509136  
C 14.784755 15.942546 24.159576  
C 13.570945 15.846077 23.362797  
C 12.520317 15.102842 24.036919  
C 12.259967 13.871185 23.312584  
C 12.614633 12.683532 24.071886  
C 13.723177 12.005104 23.423201  
C 14.937132 12.021569 24.219692  
C 15.941986 12.824151 23.543869  
C 16.271076 14.036871 24.272120  
C 14.694433 15.944262 25.561062  
C 13.385723 15.924741 26.208124  
C 12.451540 15.110706 25.440569  
C 12.046028 13.905338 26.152996  
C 12.543086 12.712214 25.473772  
C 13.546269 12.016226 26.267618  
C 14.847760 12.059686 25.621651  
C 15.819284 12.831548 26.392496  
C 16.169600 14.054245 25.674320  
C 15.695595 15.246736 26.354637  
C 13.306376 15.930497 27.607534  
C 12.279774 15.146093 28.274641  
C 11.974070 13.922446 27.552786  
C 12.359277 12.738395 28.319077  
C 13.466602 12.047674 27.673433  
C 14.684689 12.084143 28.461649

C 15.732416 12.850344 27.787176  
C 16.015789 14.085056 28.515955  
C 15.601117 15.252883 27.760700  
C 14.528349 15.991768 28.412128  
C 12.190737 15.164659 29.684198  
C 11.778351 13.964783 30.391291  
C 12.279534 12.766128 29.717161  
C 13.308931 12.119048 30.510092  
C 14.603889 12.106836 29.865061  
C 15.608972 12.851681 30.631504  
C 15.929438 14.094846 29.920670  
C 15.409872 15.261330 30.598579  
C 14.437447 15.999275 29.810976  
C 13.121060 15.978679 30.450249  
C 11.694160 13.990283 31.797428  
C 12.107319 12.833100 32.612732  
C 13.228024 12.148973 31.937559  
C 14.457804 12.147630 32.742592  
C 15.539979 12.857094 32.023151  
C 15.766622 14.097605 32.798122  
C 15.318006 15.266077 32.026360  
C 14.239300 16.014364 32.702881  
C 13.031237 15.987375 31.856281  
C 12.026224 15.192526 32.563004  
Cr 14.367527 16.251194 34.682705  
Cr 11.665298 15.375587 34.588276  
Cr 13.707737 14.048728 33.255913

Cr 12.907313 16.226723 36.538887  
Cr 16.085255 14.148606 34.776138  
Cr 15.294030 15.542614 37.029144  
Cr 13.671006 14.008108 35.524055  
Cr 11.888659 12.541594 34.577518  
Cr 11.302266 13.824318 36.465118  
Cr 14.485147 11.754977 34.707024  
Cr 13.088501 14.321494 38.114952  
Cr 14.985618 13.088047 37.079636  
Cr 12.835343 11.861842 36.921959

05H60C13Mn

H 12.863855 12.645041 20.139940  
H 15.182949 11.983807 20.284933  
H 16.508085 13.994343 20.339952  
H 15.013023 15.882249 20.227259  
H 12.752831 15.051219 20.106529  
C 16.386007 14.005898 21.424408  
C 15.954360 15.199260 22.086899  
C 14.933975 15.841061 21.314934  
C 13.646914 15.849396 21.943586  
C 12.739786 15.029881 21.197636  
C 12.320379 13.848618 21.889593  
C 12.844313 12.690762 21.230198  
C 13.811296 11.967200 21.997257  
C 15.096121 12.054424 21.370529  
C 16.058733 12.800681 22.123693

C 15.849434 15.201929 23.509245  
C 14.784025 15.941023 24.161930  
C 13.571783 15.842287 23.367270  
C 12.519733 15.100805 24.040281  
C 12.264338 13.867546 23.314226  
C 12.625155 12.683080 24.071133  
C 13.733767 12.007284 23.419874  
C 14.947965 12.026667 24.218456  
C 15.951019 12.833948 23.544416  
C 16.281044 14.045838 24.273102  
C 14.698393 15.943592 25.565077  
C 13.394054 15.911337 26.212347  
C 12.454429 15.105871 25.443001  
C 12.054026 13.897635 26.155186  
C 12.552677 12.708402 25.474421  
C 13.550731 12.000194 26.266245  
C 14.857002 12.061762 25.619221  
C 15.810860 12.849496 26.390322  
C 16.179493 14.063823 25.674278  
C 15.718574 15.266567 26.357826  
C 13.316473 15.914540 27.613441  
C 12.274709 15.144107 28.281704  
C 11.981983 13.913312 27.554935  
C 12.371770 12.732354 28.314728  
C 13.468216 12.024595 27.665920  
C 14.689601 12.080991 28.462538  
C 15.715877 12.871890 27.790798

C 16.022223 14.096026 28.517878  
C 15.629755 15.277320 27.757149  
C 14.535329 15.990523 28.409916  
C 12.190069 15.158831 29.680878  
C 11.795943 13.944208 30.391731  
C 12.288334 12.749166 29.717857  
C 13.292652 12.045695 30.505995  
C 14.603065 12.097765 29.862377  
C 15.548008 12.898574 30.630791  
C 15.934177 14.110149 29.921114  
C 15.470917 15.316363 30.599913  
C 14.450556 16.004875 29.810520  
C 13.141194 15.954991 30.448141  
C 11.719171 13.961792 31.799700  
C 12.148778 12.811304 32.599377  
C 13.209900 12.069221 31.913797  
C 14.415730 12.161905 32.742790  
C 15.455911 12.917838 32.041111  
C 15.715333 14.140794 32.801468  
C 15.377707 15.325749 32.005527  
C 14.263890 16.007330 32.681637  
C 13.057434 15.964027 31.857786  
C 12.041407 15.179474 32.559086  
Mn 14.323845 16.351088 34.636238  
Mn 11.569520 15.326774 34.481609  
Mn 13.676128 14.064774 33.366352  
Mn 12.713875 16.162415 36.626160

Mn 16.027210 14.190854 34.806393  
Mn 14.988895 15.388775 36.899746  
Mn 13.543545 14.079075 35.564659  
Mn 11.684067 12.578919 34.556862  
Mn 11.482203 14.078028 36.697067  
Mn 14.438922 11.791935 34.721104  
Mn 13.411569 14.004890 38.184177  
Mn 15.265182 12.924511 36.948837  
Mn 12.837798 11.989327 36.814987

05H60C13Fe

H 12.866678 12.648256 20.137337  
H 15.184040 11.993671 20.280212  
H 16.510466 14.000331 20.338127  
H 15.012974 15.881081 20.226276  
H 12.754118 15.049274 20.103832  
C 16.388489 14.009926 21.422661  
C 15.954625 15.201341 22.086283  
C 14.933902 15.841604 21.313986  
C 13.646651 15.848268 21.941597  
C 12.739245 15.029552 21.194996  
C 12.320743 13.848723 21.887718  
C 12.845902 12.692266 21.227703  
C 13.814495 11.970330 21.993382  
C 15.098779 12.058620 21.366337  
C 16.060974 12.804129 22.119991  
C 15.848660 15.202474 23.509052

C 14.782833 15.939816 24.161392  
C 13.570911 15.841056 23.365622  
C 12.519228 15.099428 24.039139  
C 12.264478 13.866821 23.312368  
C 12.626705 12.682150 24.068308  
C 13.736465 12.009189 23.416843  
C 14.949931 12.028698 24.214817  
C 15.953699 12.835160 23.541048  
C 16.282610 14.046736 24.271496  
C 14.696203 15.941445 25.564703  
C 13.390696 15.914367 26.211769  
C 12.453617 15.104566 25.441782  
C 12.056653 13.895668 26.153681  
C 12.555019 12.707221 25.471270  
C 13.553885 11.999306 26.261915  
C 14.859487 12.061928 25.615627  
C 15.816503 12.845291 26.387417  
C 16.180931 14.062884 25.672190  
C 15.713432 15.261922 26.356571  
C 13.313171 15.916092 27.611349  
C 12.276901 15.139156 28.280848  
C 11.987146 13.909535 27.554363  
C 12.373507 12.725274 28.311872  
C 13.472949 12.023182 27.661469  
C 14.692581 12.078618 28.456831  
C 15.721254 12.866290 27.786139  
C 16.024120 14.091737 28.516283

C 15.621567 15.268750 27.756985  
C 14.532279 15.984520 28.409533  
C 12.192311 15.153334 29.681591  
C 11.804073 13.937314 30.388641  
C 12.290909 12.740635 29.713329  
C 13.299160 12.041580 30.504036  
C 14.607828 12.092932 29.858761  
C 15.565679 12.882630 30.625259  
C 15.938532 14.104129 29.917974  
C 15.459317 15.301424 30.599682  
C 14.447550 15.997375 29.811602  
C 13.135956 15.961687 30.450073  
C 11.721737 13.952353 31.796036  
C 12.134582 12.790333 32.604103  
C 13.215509 12.061062 31.914055  
C 14.432769 12.143085 32.738438  
C 15.480151 12.897541 32.030144  
C 15.746887 14.125304 32.797443  
C 15.370047 15.311634 32.010204  
C 14.262864 16.001095 32.697250  
C 13.051820 15.971980 31.855715  
C 12.031977 15.173801 32.554283  
Fe 14.149359 16.110268 34.672428  
Fe 11.850157 15.243720 34.491604  
Fe 13.691538 14.052534 33.162819  
Fe 12.726888 16.046900 36.782803  
Fe 15.710871 14.118986 34.758190

Fe 15.105092 15.388969 36.906628  
Fe 13.527533 14.088053 35.702351  
Fe 11.927820 12.780121 34.576416  
Fe 11.379505 14.036037 36.722370  
Fe 14.364997 12.103313 34.697289  
Fe 13.357013 14.124519 38.175941  
Fe 15.164698 12.955163 36.973801  
Fe 12.895365 12.083532 36.805637

05H60C13Co

H 12.841162 12.644366 20.157879  
H 15.154624 11.996997 20.300816  
H 16.496927 13.997280 20.352982  
H 15.019768 15.886550 20.245674  
H 12.766692 15.048284 20.127542  
C 16.381121 14.009096 21.438118  
C 15.963425 15.204929 22.105646  
C 14.942713 15.847470 21.333523  
C 13.656853 15.847797 21.963243  
C 12.749553 15.030807 21.218655  
C 12.315827 13.856415 21.909449  
C 12.824330 12.691376 21.248055  
C 13.791807 11.966581 22.015944  
C 15.073332 12.061722 21.387356  
C 16.037292 12.807211 22.135433  
C 15.861646 15.205997 23.526642  
C 14.793071 15.941910 24.183830

C 13.582588 15.838846 23.388655  
C 12.528125 15.101955 24.060835  
C 12.258254 13.873192 23.333563  
C 12.607610 12.683066 24.090229  
C 13.717137 12.007637 23.438147  
C 14.933134 12.035349 24.234415  
C 15.933913 12.838976 23.559414  
C 16.282225 14.042695 24.290487  
C 14.709755 15.942837 25.586060  
C 13.406211 15.902980 26.234634  
C 12.462712 15.105198 25.464310  
C 12.048832 13.899332 26.174040  
C 12.536720 12.705740 25.489992  
C 13.537580 11.994907 26.282970  
C 14.843318 12.068491 25.636278  
C 15.797829 12.851337 26.407679  
C 16.184679 14.059763 25.691820  
C 15.735308 15.268343 26.378656  
C 13.330532 15.901794 27.636326  
C 12.288606 15.133456 28.302303  
C 11.978071 13.910656 27.571951  
C 12.353234 12.719535 28.331362  
C 13.455423 12.017035 27.679239  
C 14.675887 12.086891 28.476793  
C 15.702225 12.873864 27.809399  
C 16.029552 14.091774 28.538376  
C 15.647928 15.279242 27.774410

C 14.548745 15.986079 28.430647  
C 12.204500 15.143547 29.702507  
C 11.790314 13.933364 30.408867  
C 12.269383 12.731126 29.730312  
C 13.277348 12.023114 30.520939  
C 14.589275 12.101144 29.877172  
C 15.525770 12.906956 30.643795  
C 15.944510 14.108257 29.939194  
C 15.499462 15.326082 30.623028  
C 14.465339 15.999613 29.831457  
C 13.161139 15.925344 30.471695  
C 11.705914 13.948438 31.814043  
C 12.138293 12.795041 32.615364  
C 13.193973 12.038722 31.924496  
C 14.401886 12.156516 32.763336  
C 15.436311 12.923671 32.059265  
C 15.731047 14.141283 32.823139  
C 15.415318 15.340319 32.023380  
C 14.283892 15.985448 32.716805  
C 13.075936 15.935215 31.885227  
C 12.048707 15.155292 32.587906  
Co 14.203549 16.103460 34.649723  
Co 11.863336 15.231587 34.502476  
Co 13.690628 14.052588 33.201603  
Co 12.808599 16.076254 36.579945  
Co 15.712050 14.171979 34.762089  
Co 15.132112 15.398110 36.766357



Co 13.542248 14.085593 35.604759  
Co 11.936234 12.763448 34.547760  
Co 11.384244 13.961287 36.546379  
Co 14.309691 12.101709 34.688835  
Co 13.399247 14.107347 37.821671  
Co 15.229761 12.967966 36.763836  
Co 12.843707 12.094419 36.658871

05H60C13Ni

H 12.867932 12.650930 20.159201  
H 15.175162 11.999988 20.300377  
H 16.494938 14.005086 20.354908  
H 15.014842 15.884389 20.248075  
H 12.769525 15.050739 20.125889  
C 16.383165 14.014690 21.440483  
C 15.955572 15.206066 22.107536  
C 14.936817 15.848900 21.336018  
C 13.651469 15.855047 21.964569  
C 12.748725 15.033985 21.216848  
C 12.327549 13.855270 21.908846  
C 12.845927 12.695374 21.249397  
C 13.811695 11.971290 22.016413  
C 15.093549 12.062125 21.386808  
C 16.054440 12.810055 22.138308  
C 15.852491 15.205569 23.531096  
C 14.787431 15.943930 24.187208  
C 13.576435 15.847107 23.388737

C 12.524302 15.104632 24.061098  
C 12.268827 13.873113 23.333647  
C 12.626282 12.686380 24.089907  
C 13.735472 12.011640 23.439146  
C 14.949731 12.032429 24.236736  
C 15.951288 12.839442 23.561161  
C 16.283922 14.048599 24.294428  
C 14.701182 15.945175 25.588470  
C 13.392785 15.918447 26.235558  
C 12.455043 15.110353 25.462095  
C 12.057220 13.899233 26.173059  
C 12.553759 12.709150 25.489937  
C 13.554585 11.999878 26.283123  
C 14.861772 12.062733 25.636600  
C 15.819700 12.845177 26.411081  
C 16.186127 14.063035 25.695078  
C 15.718025 15.262348 26.381876  
C 13.312404 15.922193 27.631439  
C 12.275382 15.140491 28.299915  
C 11.983776 13.911552 27.570297  
C 12.372365 12.726452 28.329563  
C 13.472582 12.020676 27.679039  
C 14.693984 12.077386 28.476694  
C 15.727072 12.862954 27.807512  
C 16.025146 14.089960 28.540588  
C 15.626525 15.270660 27.779034  
C 14.532634 15.985255 28.431782

C 12.186725 15.155119 29.698229  
C 11.805533 13.937067 30.406851  
C 12.285784 12.738127 29.727024  
C 13.297016 12.039034 30.517151  
C 14.608562 12.086701 29.875565  
C 15.558393 12.883171 30.649200  
C 15.940820 14.102254 29.939337  
C 15.455144 15.299821 30.618681  
C 14.446050 16.001879 29.830368  
C 13.133587 15.958339 30.471611  
C 11.714346 13.950398 31.815018  
C 12.146179 12.794631 32.611794  
C 13.207982 12.046667 31.923887  
C 14.414780 12.155071 32.755077  
C 15.476048 12.892365 32.056458  
C 15.714490 14.126130 32.818432  
C 15.370781 15.313695 32.025833  
C 14.255260 15.980094 32.709312  
C 13.044613 15.977642 31.876495  
C 12.044491 15.160084 32.580208  
Ni 14.162254 16.110638 34.614994  
Ni 11.780713 15.261527 34.467621  
Ni 13.678058 14.047630 33.245720  
Ni 12.749635 16.061741 36.579082  
Ni 15.709583 14.153079 34.737377  
Ni 15.068857 15.375998 36.751251  
Ni 13.512236 14.061147 35.592224

Ni 11.923487 12.730168 34.510410  
Ni 11.430227 14.033484 36.558090  
Ni 14.322624 12.018598 34.654236  
Ni 13.392490 14.125535 37.948483  
Ni 15.208317 12.931627 36.765835  
Ni 12.945382 12.130653 36.688568

05H60C13Cu

H 12.948115 12.696109 20.136452  
H 15.229502 11.868526 20.292679  
H 16.419640 13.971233 20.332041  
H 14.985182 15.906844 20.233459  
H 12.760091 15.104928 20.113966  
C 16.344099 13.983875 21.421024  
C 15.910974 15.176644 22.079042  
C 14.913691 15.867791 21.322121  
C 13.628722 15.918691 21.960043  
C 12.741850 15.076557 21.205183  
C 12.375281 13.871578 21.883121  
C 12.890681 12.711318 21.226551  
C 13.827174 11.961596 21.988518  
C 15.136339 11.947835 21.376801  
C 16.057228 12.779747 22.119125  
C 15.820609 15.191969 23.507996  
C 14.781711 15.953206 24.165276  
C 13.555508 15.907475 23.373669  
C 12.522115 15.118157 24.040848

C 12.301105 13.887879 23.312494  
C 12.656515 12.704439 24.063560  
C 13.744111 12.002618 23.412704  
C 14.959420 11.992993 24.218180  
C 15.951440 12.818458 23.540316  
C 16.247646 14.038573 24.266272  
C 14.698094 15.949205 25.567503  
C 13.390129 15.924664 26.215279  
C 12.453739 15.113855 25.442047  
C 12.070151 13.897688 26.151039  
C 12.569831 12.713593 25.468830  
C 13.553745 11.990704 26.258732  
C 14.866231 12.031100 25.613409  
C 15.812099 12.835901 26.385536  
C 16.164612 14.052988 25.671715  
C 15.707363 15.252588 26.357088  
C 13.311600 15.923227 27.611586  
C 12.277045 15.137451 28.278702  
C 11.984222 13.908377 27.549707  
C 12.373280 12.723114 28.305689  
C 13.468184 12.009106 27.656540  
C 14.689138 12.067236 28.454662  
C 15.720428 12.853995 27.783802  
C 16.017405 14.081675 28.513004  
C 15.626493 15.266176 27.755810  
C 14.534044 15.981666 28.409201  
C 12.187342 15.151443 29.675200

C 11.812480 13.932929 30.384872  
C 12.280647 12.730856 29.703939  
C 13.294138 12.044824 30.499428  
C 14.602996 12.078665 29.853270  
C 15.543231 12.883969 30.624390  
C 15.941370 14.093636 29.912743  
C 15.454195 15.287584 30.595669  
C 14.452164 15.998457 29.806639  
C 13.143414 15.938187 30.449413  
C 11.719418 13.945926 31.791340  
C 12.131407 12.783177 32.585106  
C 13.207559 12.053576 31.908043  
C 14.416638 12.143379 32.731125  
C 15.463408 12.893685 32.032475  
C 15.730764 14.118491 32.788357  
C 15.374615 15.304332 32.002533  
C 14.268409 15.994949 32.681519  
C 13.054187 15.956314 31.854753  
C 12.040826 15.156982 32.550941  
Cu 14.181968 16.204088 34.635246  
Cu 11.788295 15.349397 34.494225  
Cu 13.671831 14.055587 33.415264  
Cu 12.697433 16.115673 36.734829  
Cu 15.804933 14.222801 34.753838  
Cu 15.171827 15.395899 36.894821  
Cu 13.525411 14.121781 35.808506  
Cu 11.831887 12.746838 34.530174

Cu 11.334709 13.983998 36.665321  
Cu 14.385881 12.009651 34.695290  
Cu 13.376505 14.150905 38.224659  
Cu 15.210468 12.896616 36.907799  
Cu 12.903066 12.082053 36.766953

05H60C13Zn

H 12.938019 12.758306 20.095875  
H 15.204726 11.964979 20.265028  
H 16.515265 13.906622 20.344238  
H 14.982402 15.751019 20.218132  
H 12.609108 15.185909 20.088314  
C 16.397070 13.919995 21.429615  
C 15.921846 15.100332 22.076498  
C 14.914083 15.767473 21.307615  
C 13.641558 15.840072 21.925083  
C 12.604116 15.144403 21.178856  
C 12.311386 13.885907 21.843822  
C 12.857341 12.756771 21.184574  
C 13.808909 12.008504 21.949989  
C 15.106487 12.015922 21.351070  
C 16.104370 12.700494 22.130165  
C 15.835003 15.106367 23.504807  
C 14.780107 15.852973 24.150387  
C 13.571670 15.824816 23.350664  
C 12.485363 15.112939 24.013750  
C 12.248178 13.880562 23.270529

C 12.621388 12.699427 24.023008  
C 13.718118 12.010548 23.377241  
C 14.916643 11.965837 24.186672  
C 15.991897 12.719373 23.537561  
C 16.269339 13.956458 24.265764  
C 14.688631 15.869041 25.554434  
C 13.381966 15.873528 26.190310  
C 12.415292 15.103537 25.409966  
C 12.019585 13.884480 26.114073  
C 12.515870 12.701172 25.427292  
C 13.491660 11.967794 26.217896  
C 14.806436 11.986814 25.584448  
C 15.772324 12.749991 26.374643  
C 16.155001 13.969035 25.666143  
C 15.684344 15.166033 26.350203  
C 13.295401 15.884655 27.588518  
C 12.258494 15.106078 28.250620  
C 11.937270 13.891075 27.512028  
C 12.313583 12.698241 28.264139  
C 13.394081 11.966035 27.615044  
C 14.609123 11.995972 28.424715  
C 15.665026 12.765961 27.768465  
C 15.950969 13.991421 28.505957  
C 15.595645 15.182874 27.748573  
C 14.517550 15.931814 28.393717  
C 12.170990 15.113762 29.653381  
C 11.798223 13.900606 30.362511

C 12.212168 12.691996 29.662594  
C 13.201484 11.977129 30.450737  
C 14.509619 11.992809 29.821728  
C 15.427809 12.800106 30.614807  
C 15.846832 14.000415 29.908104  
C 15.375655 15.193127 30.589567  
C 14.428888 15.965633 29.785065  
C 13.117655 15.894858 30.427984  
C 11.716883 13.906036 31.776789  
C 12.072488 12.726068 32.530720  
C 13.100143 11.966969 31.870583  
C 14.277119 12.073442 32.696621  
C 15.324209 12.814028 32.029369  
C 15.613525 14.036524 32.758301  
C 15.280065 15.208640 32.000847  
C 14.242708 16.029024 32.674477  
C 13.023490 15.929745 31.839705  
C 12.043265 15.117446 32.519043  
Zn 14.996553 17.341290 34.124130  
Zn 11.112981 15.504771 34.341270  
Zn 13.540386 14.878656 34.297516  
Zn 12.373070 16.426105 36.493729  
Zn 16.016939 14.191976 34.722126  
Zn 14.939724 15.978340 36.353268  
Zn 15.177594 13.369048 36.862003  
Zn 11.625999 12.751741 34.489155  
Zn 11.191054 14.167258 36.462337

Zn 14.262979 12.190983 34.707291  
Zn 13.337419 14.663993 37.903568  
Zn 16.970270 12.321642 38.343651  
Zn 12.849171 12.354279 36.896580

05H60C13Y

H 12.933484 12.102017 20.600166  
H 15.335713 11.921257 20.506496  
H 16.109911 14.179909 20.321899  
H 14.190275 15.669675 20.310341  
H 12.156853 14.394484 20.477205  
C 16.104439 14.237149 21.411907  
C 15.448379 15.325860 22.069559  
C 14.236054 15.685221 21.400999  
C 13.044511 15.490495 22.170992  
C 12.278061 14.436275 21.560696  
C 12.267236 13.229972 22.345877  
C 13.000129 12.201406 21.685501  
C 14.174098 11.756498 22.365679  
C 15.345078 12.051032 21.589935  
C 16.190655 13.041937 22.196760  
C 15.497932 15.403132 23.497110  
C 14.370749 15.934765 24.232937  
C 13.116872 15.561548 23.583223  
C 12.338972 14.635156 24.408188  
C 12.349067 13.330797 23.765198  
C 13.083914 12.336432 24.528147

C 14.241105 11.878517 23.786943  
C 15.502069 12.190390 24.438831  
C 16.232075 13.146537 23.608679  
C 16.300056 14.459099 24.247019  
C 14.428722 16.011847 25.632990  
C 13.218668 15.775742 26.423370  
C 12.407354 14.722787 25.799212  
C 12.430984 13.504484 26.611336  
C 13.151775 12.440918 25.931015  
C 14.364181 12.045395 26.629501  
C 15.559114 12.301221 25.832172  
C 16.404388 13.330120 26.459570  
C 16.354040 14.548922 25.644686  
C 15.634905 15.606664 26.331480  
C 13.268589 15.872295 27.810875  
C 12.496522 14.925767 28.628668  
C 12.477723 13.597246 28.011826  
C 13.271020 12.622908 28.766096  
C 14.428542 12.145662 28.028215  
C 15.690546 12.499538 28.672497  
C 16.474468 13.424265 27.846319  
C 16.480097 14.743304 28.504179  
C 15.687113 15.688264 27.741093  
C 14.543179 16.181074 28.467537  
C 12.492292 15.062746 30.028740  
C 12.550478 13.781223 30.818050  
C 13.328482 12.687677 30.177525

C 14.584538 12.352233 30.856133  
C 15.780468 12.570769 30.065750  
C 16.645428 13.583800 30.695433  
C 16.530750 14.826994 29.912132  
C 15.727607 15.797146 30.615318  
C 14.596294 16.269924 29.870560  
C 13.356064 16.121164 30.612970  
C 12.687317 13.931074 32.250134  
C 13.378270 12.837997 33.010227  
C 14.657869 12.447522 32.259003  
C 15.941654 12.658847 32.947098  
C 16.726570 13.666033 32.077572  
C 16.661127 15.014112 32.811932  
C 15.753878 15.895020 32.091492  
C 14.625086 16.556061 32.755524  
C 13.389840 16.280357 31.981302  
C 12.506316 15.294954 32.789146  
Y 12.580398 17.159428 34.009270  
Y 10.392910 14.764000 31.552486  
Y 14.651691 14.606006 34.126797  
Y 8.871938 15.827251 34.962364  
Y 17.761593 13.488329 34.115910  
Y 11.447220 15.845990 37.224854  
Y 11.502010 13.886862 34.590057  
Y 11.622612 11.679876 31.874126  
Y 8.596905 12.555792 33.765190  
Y 14.476257 11.415922 34.419884

Y 9.498674 13.149780 37.025398  
Y 12.972712 12.764191 37.411724  
Y 11.085135 10.632936 35.412975

05H60C13Zr

H 12.771006 12.277524 20.413774  
H 15.068656 11.564545 20.551912  
H 16.318113 13.596184 20.374561  
H 14.811710 15.460810 20.132135  
H 12.555343 14.668086 20.151829  
C 16.243551 13.711088 21.457529  
C 15.807541 14.953277 22.014532  
C 14.770288 15.536091 21.220346  
C 13.506336 15.642317 21.881777  
C 12.578915 14.748799 21.239868  
C 12.243369 13.615048 22.056892  
C 12.763755 12.410668 21.497311  
C 13.741377 11.745366 22.297115  
C 15.011600 11.742088 21.626980  
C 15.988699 12.569613 22.280453  
C 15.751060 15.094364 23.437418  
C 14.717237 15.904830 24.044916  
C 13.474653 15.774637 23.294041  
C 12.450432 15.080935 24.073809  
C 12.228604 13.771968 23.476883  
C 12.639528 12.675219 24.329035  
C 13.711327 11.916124 23.711735

C 14.951270 11.979613 24.471323  
C 15.927432 12.732351 23.689915  
C 16.229492 14.024496 24.291994  
C 14.671838 16.045681 25.440718  
C 13.383888 16.117348 26.133802  
C 12.425126 15.224830 25.462547  
C 12.122189 14.070197 26.303343  
C 12.607405 12.827439 25.727301  
C 13.614936 12.163671 26.550289  
C 14.905080 12.137424 25.856247  
C 15.866947 13.012664 26.530773  
C 16.177467 14.171226 25.685194  
C 15.698296 15.423269 26.258451  
C 13.350100 16.256008 27.520227  
C 12.350039 15.513372 28.305864  
C 12.087117 14.216406 27.693995  
C 12.518715 13.110496 28.532837  
C 13.577892 12.309618 27.935598  
C 14.817031 12.439612 28.719126  
C 15.825036 13.158998 27.914623  
C 16.120037 14.470002 28.491089  
C 15.659421 15.571116 27.648987  
C 14.595276 16.324524 28.279812  
C 12.291901 15.651077 29.693497  
C 11.970119 14.467117 30.486923  
C 12.445906 13.227292 29.913696  
C 13.409605 12.469068 30.767796

C 14.797254 12.525216 30.123186  
C 15.857046 13.432796 30.718292  
C 16.113859 14.616232 29.860762  
C 15.617430 15.836407 30.472115  
C 14.569507 16.460760 29.688326  
C 13.278558 16.503750 30.392607  
C 11.884631 14.554010 31.904478  
C 12.054266 13.247076 32.696293  
C 13.004470 12.179998 32.120415  
C 15.956212 12.484931 32.992310  
C 16.322937 13.546230 32.069637  
C 16.381222 14.929072 32.689610  
C 15.675189 15.965605 31.909512  
C 14.543617 16.579441 32.581802  
C 13.297403 16.565620 31.795673  
C 12.306254 15.781340 32.619507  
Zr 13.458177 16.316769 34.550323  
Zr 10.860405 14.610812 34.027233  
Zr 14.135478 14.228263 32.372063  
Zr 11.782609 15.295282 36.807220  
Zr 16.218233 13.879112 34.615765  
Zr 14.716072 14.855946 37.198952  
Zr 13.236582 13.347203 35.208244  
Zr 11.288577 11.470806 33.720394  
Zr 10.555534 12.654465 36.308739  
Zr 14.534380 11.148710 33.654217  
Zr 12.849681 12.836986 38.130325

Zr 15.251547 11.948695 36.750195  
Zr 12.700206 10.623969 36.150974

05H60C13Nb

H 12.845320 12.635766 20.070972  
H 15.168935 11.988132 20.211908  
H 16.511444 14.003907 20.269506  
H 15.028538 15.908581 20.165398  
H 12.764551 15.056801 20.038189  
C 16.385101 14.011081 21.353621  
C 15.968238 15.207245 22.021912  
C 14.945970 15.852328 21.252289  
C 13.655725 15.854431 21.878515  
C 12.752083 15.033059 21.129339  
C 12.319982 13.855109 21.820246  
C 12.834452 12.690487 21.160917  
C 13.800956 11.962578 21.929417  
C 15.083700 12.060190 21.297646  
C 16.050499 12.804905 22.048399  
C 15.861181 15.205024 23.441523  
C 14.793007 15.944576 24.094654  
C 13.579676 15.845243 23.301155  
C 12.526953 15.100933 23.972946  
C 12.265018 13.871208 23.244171  
C 12.618803 12.681855 24.001451  
C 13.727665 12.002989 23.350286  
C 14.945923 12.026728 24.143110



C 15.947105 12.834579 23.469713  
C 16.285194 14.042215 24.202732  
C 14.705471 15.940120 25.497725  
C 13.400956 15.906630 26.148884  
C 12.461691 15.102986 25.378466  
C 12.062499 13.895815 26.090771  
C 12.552120 12.707110 25.405434  
C 13.552351 11.995692 26.192310  
C 14.856078 12.058489 25.545301  
C 15.809662 12.843105 26.318047  
C 16.183033 14.056499 25.605654  
C 15.722221 15.257378 26.289114  
C 13.325964 15.907278 27.553429  
C 12.299987 15.126204 28.228420  
C 11.996005 13.906760 27.495121  
C 12.385572 12.725616 28.252174  
C 13.474850 12.017847 27.595646  
C 14.693220 12.075207 28.392233  
C 15.716619 12.862170 27.721378  
C 16.023445 14.082623 28.448523  
C 15.633672 15.263533 27.691694  
C 14.544444 15.972258 28.347761  
C 12.211411 15.141144 29.633087  
C 11.806917 13.929953 30.339918  
C 12.300053 12.736234 29.656988  
C 13.302435 12.031165 30.443607  
C 14.611528 12.084606 29.795353

C 15.554072 12.885841 30.561459  
C 15.946815 14.095366 29.852591  
C 15.477977 15.298256 30.538385  
C 14.462208 15.987672 29.752316  
C 13.151317 15.952442 30.397919  
C 11.693547 13.942572 31.744865  
C 12.048844 12.698278 32.519768  
C 13.212801 12.018028 31.853643  
C 14.479269 12.016663 32.668072  
C 15.499780 12.878969 31.978992  
C 15.885485 14.122867 32.728683  
C 15.420180 15.326385 31.949249  
C 14.326168 16.113579 32.617352  
C 13.059561 15.993543 31.803574  
C 11.949203 15.232910 32.481709  
Nb 14.187100 16.403917 34.715508  
Nb 11.591035 15.421546 34.553291  
Nb 13.713706 14.039760 33.117035  
Nb 12.732723 16.278889 37.475945  
Nb 15.946311 14.212582 34.863846  
Nb 15.288691 15.466821 37.443108  
Nb 13.417975 14.162497 35.999451  
Nb 11.674211 12.641488 34.611420  
Nb 11.161350 13.930388 37.405327  
Nb 14.366925 11.848583 34.798023  
Nb 13.231592 14.206707 38.900040  
Nb 15.336751 12.836931 37.393051

Nb 12.886183 11.880154 37.338326

05H60C13Mo

H 12.841438 12.695679 20.095346

H 15.153481 12.012592 20.225111

H 16.506014 14.008817 20.298187

H 15.025389 15.916396 20.209709

H 12.753818 15.107919 20.085566

C 16.382256 14.009131 21.382645

C 15.964443 15.199741 22.059338

C 14.947552 15.860921 21.296738

C 13.661860 15.877851 21.929253

C 12.744306 15.075571 21.176451

C 12.316536 13.889908 21.858051

C 12.826713 12.733232 21.186117

C 13.787395 11.989943 21.944485

C 15.071564 12.071070 21.311815

C 16.045656 12.798944 22.069788

C 15.862897 15.187208 23.481480

C 14.806682 15.931053 24.143471

C 13.589948 15.855196 23.352144

C 12.533078 15.114937 24.020508

C 12.263329 13.892844 23.283352

C 12.613667 12.696402 24.029804

C 13.714790 12.015725 23.367741

C 14.932272 12.016550 24.160494

C 15.942487 12.817579 23.491282

C 16.286053 14.018898 24.233557

C 14.725296 15.917959 25.546698

C 13.419643 15.904593 26.195372

C 12.473860 15.107310 25.424196

C 12.072868 13.898228 26.129162

C 12.549713 12.709918 25.434298

C 13.543615 11.981419 26.212902

C 14.847020 12.036169 25.563402

C 15.813509 12.803133 26.340767

C 16.188189 14.022379 25.635923

C 15.733224 15.218882 26.331602

C 13.343698 15.899618 27.595114

C 12.307861 15.125285 28.264132

C 12.009963 13.902890 27.533504

C 12.385422 12.710190 28.278486

C 13.468521 11.995046 27.614552

C 14.689372 12.031596 28.407236

C 15.721840 12.813313 27.742517

C 16.030766 14.028730 28.483826

C 15.638857 15.213642 27.734909

C 14.562278 15.940569 28.390816

C 12.226224 15.131330 29.667131

C 11.842663 13.915228 30.362680

C 12.312001 12.716668 29.682329

C 13.308832 11.987548 30.464388

C 14.607840 12.033443 29.813114

C 15.557869 12.808754 30.590473

C 15.942389 14.030933 29.887156  
C 15.474952 15.229424 30.568876  
C 14.477818 15.945883 29.794693  
C 13.169911 15.930608 30.448109  
C 11.738746 13.925396 31.772148  
C 12.096093 12.675795 32.530857  
C 13.226332 11.984425 31.872816  
C 14.448099 12.011092 32.745056  
C 15.481272 12.806105 32.000984  
C 15.845995 14.031208 32.743946  
C 15.405128 15.251930 31.979511  
C 14.342016 16.043322 32.683220  
C 13.076442 15.960199 31.857285  
C 11.972909 15.187304 32.548912  
Mo 14.162251 16.242981 34.812904  
Mo 11.760561 15.369756 34.677521  
Mo 13.698268 14.029557 33.155235  
Mo 12.637712 16.266743 37.422405  
Mo 15.967312 14.429992 34.778816  
Mo 15.082998 15.614600 37.309776  
Mo 13.558493 13.983860 35.914284  
Mo 11.551960 12.825804 34.529404  
Mo 11.211515 14.200521 37.093468  
Mo 14.358596 11.929081 34.904335  
Mo 13.302904 14.285172 38.482971  
Mo 15.893617 13.259650 36.780449  
Mo 12.161150 11.900713 36.572906

05H60C13Tc

H 12.887160 12.643116 20.116102  
H 15.219056 12.023858 20.267817  
H 16.531372 14.047376 20.337093  
H 15.021381 15.914576 20.222570  
H 12.769487 15.050029 20.086615  
C 16.402311 14.053155 21.420765  
C 15.960874 15.240705 22.087244  
C 14.934683 15.866842 21.309345  
C 13.644584 15.854091 21.930531  
C 12.749772 15.027206 21.177464  
C 12.333152 13.844015 21.866438  
C 12.868464 12.691570 21.206247  
C 13.842298 11.977759 21.976318  
C 15.126930 12.088685 21.353210  
C 16.079712 12.841646 22.112898  
C 15.847131 15.235316 23.508104  
C 14.768256 15.959509 24.156773  
C 13.562779 15.844769 23.354139  
C 12.515622 15.090616 24.019314  
C 12.271010 13.859880 23.290085  
C 12.634381 12.673923 24.046576  
C 13.757191 12.015258 23.397930  
C 14.967250 12.051791 24.200405  
C 15.968940 12.866072 23.533001  
C 16.286402 14.079142 24.268263

C 14.670235 15.954022 25.559072  
C 13.359208 15.915623 26.198685  
C 12.438804 15.093404 25.423018  
C 12.047888 13.881867 26.129486  
C 12.556803 12.697003 25.447582  
C 13.564486 12.003595 26.240957  
C 14.870957 12.078709 25.601652  
C 15.824667 12.861924 26.378395  
C 16.176571 14.088282 25.668179  
C 15.683331 15.274978 26.353289  
C 13.271637 15.913660 27.597773  
C 12.245419 15.118346 28.257826  
C 11.970356 13.892119 27.530903  
C 12.362058 12.708983 28.288559  
C 13.477518 12.026059 27.642227  
C 14.691431 12.090761 28.439587  
C 15.724912 12.875938 27.775475  
C 16.004229 14.103716 28.512859  
C 15.580091 15.272483 27.757212  
C 14.486406 15.978782 28.404709  
C 12.156068 15.128002 29.663256  
C 11.783370 13.914865 30.369640  
C 12.276948 12.722779 29.687695  
C 13.293092 12.037061 30.476475  
C 14.600188 12.101735 29.845201  
C 15.562160 12.875458 30.624681  
C 15.910357 14.108138 29.915472

C 15.386467 15.276553 30.595194  
C 14.392004 15.981691 29.807426  
C 13.072454 15.949613 30.437624  
C 11.677963 13.930230 31.779627  
C 12.048119 12.722597 32.568924  
C 13.198795 12.033794 31.885986  
C 14.437191 12.071001 32.723164  
C 15.485119 12.872293 32.027523  
C 15.778556 14.115649 32.817207  
C 15.300465 15.290955 32.017426  
C 14.200390 16.072418 32.673134  
C 12.970869 15.972694 31.838110  
C 11.928229 15.178881 32.560699  
Tc 14.238523 16.327612 34.722237  
Tc 11.690803 15.294952 34.660198  
Tc 13.660328 14.032817 33.151943  
Tc 12.844175 16.601231 36.525330  
Tc 15.892231 14.147682 34.926182  
Tc 15.286161 15.622054 36.981415  
Tc 13.528733 14.232394 35.858574  
Tc 11.919708 12.466661 34.623154  
Tc 11.187988 13.563532 36.593784  
Tc 14.205673 11.929831 34.795883  
Tc 13.848831 14.008758 38.253380  
Tc 15.423640 12.699993 36.824558  
Tc 12.857197 12.044912 37.316200

05H60C13Ru

H 12.858386 12.662013 20.122995  
H 15.171492 11.981806 20.263624  
H 16.503954 13.982368 20.321411  
H 15.012736 15.879131 20.213562  
H 12.742885 15.070905 20.090721  
C 16.381279 13.991777 21.405840  
C 15.950464 15.183692 22.070601  
C 14.933970 15.833697 21.301119  
C 13.648283 15.856031 21.931612  
C 12.734748 15.045106 21.181664  
C 12.316339 13.862255 21.874464  
C 12.840108 12.706970 21.213367  
C 13.801455 11.974359 21.978336  
C 15.086619 12.050337 21.349453  
C 16.057770 12.784337 22.105036  
C 15.847940 15.183082 23.493473  
C 14.788083 15.928077 24.147903  
C 13.573298 15.845359 23.353710  
C 12.516545 15.107924 24.026566  
C 12.259680 13.876768 23.298389  
C 12.619057 12.689116 24.054996  
C 13.725456 12.011584 23.401505  
C 14.940065 12.017317 24.198938  
C 15.953118 12.814348 23.524109  
C 16.283943 14.028090 24.255020  
C 14.700956 15.931199 25.548532

C 13.392145 15.920575 26.195765  
C 12.449602 15.113354 25.427349  
C 12.052591 13.904207 26.140083  
C 12.547531 12.713082 25.457409  
C 13.548286 12.006839 26.247778  
C 14.852275 12.050306 25.599178  
C 15.821978 12.824109 26.371084  
C 16.184521 14.044246 25.654625  
C 15.708117 15.238494 26.338423  
C 13.312338 15.928558 27.591795  
C 12.275011 15.151483 28.263477  
C 11.981124 13.921209 27.539412  
C 12.374285 12.740551 28.299793  
C 13.470831 12.033666 27.649492  
C 14.692072 12.074690 28.441862  
C 15.734722 12.843701 27.766628  
C 16.026901 14.073999 28.498436  
C 15.616168 15.246630 27.740618  
C 14.535034 15.974971 28.389973  
C 12.189496 15.168815 29.664856  
C 11.805819 13.958194 30.376053  
C 12.293947 12.761954 29.699282  
C 13.307327 12.078922 30.487728  
C 14.609944 12.093634 29.844673  
C 15.586287 12.860582 30.617092  
C 15.941744 14.086630 29.899641  
C 15.434730 15.266939 30.573292

|                                  |                                 |
|----------------------------------|---------------------------------|
| C 14.447800 15.987729 29.789497  | H 12.854453 12.662332 20.124554 |
| C 13.134453 15.975718 30.432592  | H 15.162655 11.990047 20.266117 |
| C 11.696425 13.976414 31.783087  | H 16.494480 13.985106 20.322603 |
| C 12.093842 12.780254 32.593399  | H 15.017271 15.879510 20.215792 |
| C 13.216352 12.074512 31.901672  | H 12.757506 15.064976 20.096260 |
| C 14.449081 12.103452 32.737411  | C 16.378881 13.996068 21.407719 |
| C 15.525264 12.859251 32.019848  | C 15.957305 15.190052 22.073744 |
| C 15.797567 14.112933 32.794785  | C 14.940947 15.839483 21.303703 |
| C 15.366729 15.294088 31.991169  | C 13.655571 15.853530 21.935343 |
| C 14.279533 16.047729 32.680801  | C 12.743435 15.042769 21.187286 |
| C 13.040845 16.016069 31.835018  | C 12.319540 13.863356 21.878067 |
| C 11.998857 15.218975 32.552254  | C 12.833982 12.704247 21.214956 |
| Ru 14.216608 16.241234 34.725830 | C 13.795707 11.972733 21.981094 |
| Ru 11.736318 15.334756 34.597427 | C 15.079585 12.053490 21.352465 |
| Ru 13.694347 14.059245 33.163567 | C 16.045692 12.792810 22.106506 |
| Ru 12.703562 16.234592 36.834190 | C 15.856175 15.191563 23.495947 |
| Ru 15.845390 14.156921 34.853260 | C 14.794907 15.936081 24.152523 |
| Ru 15.246064 15.501001 36.994499 | C 13.580557 15.845251 23.358631 |
| Ru 13.530656 14.091287 35.864662 | C 12.524862 15.107649 24.032467 |
| Ru 11.829889 12.690669 34.625542 | C 12.262036 13.878158 23.302769 |
| Ru 11.210312 14.013101 36.773685 | C 12.614753 12.689192 24.059036 |
| Ru 14.371040 11.964163 34.793896 | C 13.719416 12.009283 23.404018 |
| Ru 13.390165 14.118021 38.235348 | C 14.934929 12.021935 24.203144 |
| Ru 15.346798 12.840172 37.029335 | C 15.941415 12.823058 23.527721 |
| Ru 12.838647 11.929719 36.894470 | C 16.281616 14.031477 24.259113 |
|                                  | C 14.711332 15.940541 25.551689 |
|                                  | C 13.402559 15.916562 26.200888 |

05H60C13Rh

C 12.456778 15.113043 25.431646  
C 12.053022 13.903496 26.144154  
C 12.540229 12.709106 25.458853  
C 13.540177 11.996108 26.250381  
C 14.847759 12.052069 25.601383  
C 15.809644 12.833313 26.374207  
C 16.187304 14.048362 25.657135  
C 15.727610 15.252497 26.344198  
C 13.323410 15.923440 27.594440  
C 12.284230 15.144964 28.267303  
C 11.979345 13.916809 27.538931  
C 12.364496 12.729286 28.298765  
C 13.460090 12.015419 27.644716  
C 14.683189 12.073225 28.443113  
C 15.720552 12.852129 27.768475  
C 16.028996 14.078837 28.500542  
C 15.640167 15.264187 27.738649  
C 14.546508 15.981629 28.392694  
C 12.191721 15.163869 29.661106  
C 11.797293 13.946207 30.370405  
C 12.275019 12.740092 29.693243  
C 13.286637 12.034814 30.483662  
C 14.601811 12.081421 29.839411  
C 15.561871 12.875167 30.607708  
C 15.953135 14.093819 29.896475  
C 15.477480 15.300683 30.574694  
C 14.463181 16.003799 29.787170

C 13.146941 15.966347 30.427917  
C 11.686873 13.962937 31.771021  
C 12.133212 12.799595 32.573788  
C 13.195904 12.027411 31.885544  
C 14.416812 12.149564 32.717430  
C 15.498871 12.876407 32.011757  
C 15.742702 14.124569 32.773464  
C 15.411646 15.330832 31.977606  
C 14.278396 15.998286 32.662102  
C 13.052846 16.006117 31.828167  
C 12.047614 15.178542 32.537956  
Rh 14.245825 16.324722 34.678761  
Rh 11.665712 15.382072 34.534267  
Rh 13.684707 14.058468 33.306419  
Rh 12.691677 16.235264 36.832855  
Rh 15.935734 14.159223 34.807556  
Rh 15.250257 15.500453 36.998405  
Rh 13.529158 14.091093 35.867737  
Rh 11.761168 12.634273 34.575424  
Rh 11.202464 14.024297 36.770226  
Rh 14.401348 11.879118 34.743446  
Rh 13.373356 14.122524 38.409622  
Rh 15.342704 12.836164 37.036243  
Rh 12.840851 11.922679 36.894669

05H60C13Ag

H 12.852695 12.636613 20.088505

|                                 |                                 |
|---------------------------------|---------------------------------|
| H 15.169520 11.995093 20.222801 | C 12.068910 13.890013 26.114063 |
| H 16.498526 14.006305 20.271109 | C 12.567191 12.703578 25.429070 |
| H 14.999733 15.890642 20.166544 | C 13.575205 11.999889 26.213350 |
| H 12.751184 15.038744 20.052811 | C 14.876686 12.067143 25.559399 |
| C 16.378429 14.016668 21.355843 | C 15.835276 12.855686 26.325344 |
| C 15.951921 15.210443 22.021555 | C 16.192787 14.073257 25.608631 |
| C 14.924588 15.846136 21.254469 | C 15.725832 15.272640 26.293053 |
| C 13.639784 15.845628 21.887348 | C 13.325556 15.913458 27.563322 |
| C 12.736908 15.021686 21.144028 | C 12.300138 15.129986 28.243164 |
| C 12.318061 13.843234 21.839886 | C 12.001934 13.903248 27.514992 |
| C 12.837049 12.685018 21.178757 | C 12.407898 12.723754 28.271778 |
| C 13.809445 11.966502 21.944693 | C 13.504268 12.024333 27.613178 |
| C 15.088890 12.063331 21.309080 | C 14.729540 12.090484 28.400398 |
| C 16.053255 12.812007 22.056648 | C 15.754172 12.875084 27.722820 |
| C 15.850285 15.213137 23.444286 | C 16.051437 14.103123 28.446894 |
| C 14.781752 15.946238 24.102137 | C 15.644071 15.281443 27.691988 |
| C 13.568251 15.839193 23.313046 | C 14.550442 15.984035 28.350817 |
| C 12.522373 15.093360 23.990656 | C 12.224285 15.143188 29.645359 |
| C 12.267387 13.862109 23.265711 | C 11.873176 13.929197 30.368420 |
| C 12.631248 12.678912 24.025627 | C 12.333709 12.735398 29.673893 |
| C 13.739326 12.007327 23.368029 | C 13.361472 12.068737 30.459909 |
| C 14.957912 12.034987 24.157991 | C 14.659021 12.101075 29.802002 |
| C 15.953694 12.844811 23.478590 | C 15.604399 12.906898 30.565893 |
| C 16.285515 14.057030 24.207560 | C 15.987483 14.116341 29.849079 |
| C 14.699940 15.946918 25.504860 | C 15.492938 15.303010 30.536678 |
| C 13.397360 15.908206 26.161873 | C 14.478827 16.000420 29.752642 |
| C 12.459167 15.098129 25.395470 | C 13.183154 15.924902 30.410879 |



C 11.808167 13.943649 31.783915  
C 12.207719 12.780234 32.554878  
C 13.290057 12.090609 31.872103  
C 14.501530 12.161497 32.661835  
C 15.526353 12.925047 31.975405  
C 15.795014 14.140969 32.713539  
C 15.417617 15.309828 31.946350  
C 14.325136 15.992223 32.614567  
C 13.113237 15.931112 31.821720  
C 12.102512 15.158027 32.523739  
Ag 14.111647 16.819256 34.618782  
Ag 11.507739 15.418317 34.625813  
Ag 13.924546 14.087486 34.155304  
Ag 12.657921 16.842770 36.925430  
Ag 16.529753 14.185535 34.861176  
Ag 15.088571 15.514676 36.891808  
Ag 12.481972 14.045088 37.038422  
Ag 11.646095 12.537217 34.666012  
Ag 9.880247 13.922739 36.315804  
Ag 14.363249 11.397955 34.696407  
Ag 14.161290 14.171309 39.147293  
Ag 15.213447 12.819554 36.951248  
Ag 12.912177 11.276176 37.001530

05H60C13Cd

H 12.524366 12.604219 20.143328  
H 14.950266 12.212685 20.154835

H 16.355721 14.163695 20.205303  
H 14.887533 15.988880 20.196245  
H 12.678226 15.049359 20.140924  
C 16.290319 14.142846 21.294832  
C 15.929520 15.334230 22.013622  
C 14.847973 15.938154 21.286127  
C 13.585507 15.862817 21.950325  
C 12.652376 15.047210 21.232410  
C 12.218926 13.885300 21.915386  
C 12.574868 12.649315 21.232616  
C 13.702244 12.040492 21.923147  
C 14.936351 12.196113 21.246449  
C 15.934220 12.932958 21.963974  
C 15.888242 15.308949 23.427128  
C 14.799309 15.983751 24.130184  
C 13.567052 15.856841 23.380083  
C 12.556658 15.094129 24.076313  
C 12.224743 13.890057 23.341717  
C 12.589021 12.676055 24.066921  
C 13.699356 12.055266 23.349663  
C 14.942559 12.116012 24.088945  
C 15.915771 12.926299 23.393862  
C 16.305773 14.103630 24.140688  
C 14.765149 15.955318 25.533655  
C 13.486053 15.883494 26.232727  
C 12.527407 15.083771 25.485359  
C 12.145893 13.872156 26.188154

C 12.586090 12.679127 25.462318  
C 13.650279 11.987875 26.194454  
C 14.920339 12.092133 25.498024  
C 15.909161 12.853785 26.248426  
C 16.263027 14.082380 25.544609  
C 15.821619 15.268364 26.275139  
C 13.459685 15.877001 27.633997  
C 12.473272 15.065148 28.332195  
C 12.130502 13.859683 27.589878  
C 12.551626 12.658294 28.305897  
C 13.629011 11.972452 27.595161  
C 14.880782 12.039008 28.342049  
C 15.884285 12.837272 27.649401  
C 16.203909 14.050373 28.395937  
C 15.788865 15.250828 27.675444  
C 14.713663 15.944958 28.383728  
C 12.447374 15.050713 29.739714  
C 12.119884 13.824055 30.443350  
C 12.518520 12.633384 29.705462  
C 13.579226 11.950922 30.439083  
C 14.854795 12.015367 29.746634  
C 15.785422 12.831697 30.511787  
C 16.175039 14.037238 29.799654  
C 15.712755 15.211657 30.522129  
C 14.689277 15.943852 29.783991  
C 13.421780 15.823734 30.489983  
C 12.117199 13.807653 31.863167

C 12.543181 12.632318 32.601032  
C 13.559167 11.921724 31.853910  
C 14.769078 12.017739 32.621674  
C 15.758452 12.817892 31.939117  
C 16.073334 14.021539 32.673302  
C 15.704697 15.205529 31.938923  
C 14.645975 15.878404 32.656685  
C 13.405848 15.804746 31.912752  
C 12.496921 14.959226 32.630180  
Cd 14.595784 16.963156 34.661160  
Cd 9.817167 15.505749 34.766899  
Cd 12.953938 14.277314 34.717773  
Cd 12.107839 17.766769 35.773239  
Cd 16.105185 14.171098 34.863186  
Cd 15.216105 15.708126 37.137535  
Cd 13.009230 14.060184 37.806503  
Cd 11.261663 11.679222 34.306602  
Cd 10.435534 12.997053 36.712807  
Cd 14.701228 11.372439 34.770576  
Cd 10.801970 15.964737 37.618820  
Cd 15.527630 12.619870 37.243591  
Cd 12.741287 11.152215 36.887203

05H60C13Lu

H 13.104706 12.933686 20.029989  
H 15.456197 12.393044 20.238478  
H 16.709824 14.436279 20.506382

|                                 |                                 |
|---------------------------------|---------------------------------|
| H 15.085803 16.219440 20.463371 | C 13.574778 11.884176 26.117781 |
| H 12.860792 15.326469 20.170427 | C 14.902660 12.038690 25.541420 |
| C 16.530247 14.356825 21.579676 | C 15.793612 12.799040 26.419384 |
| C 15.995869 15.472307 22.309608 | C 16.141916 14.080378 25.808290 |
| C 14.965051 16.098839 21.541552 | C 15.573542 15.202435 26.551777 |
| C 13.655274 15.999996 22.104445 | C 13.083126 15.593072 27.747604 |
| C 12.805524 15.216287 21.254719 | C 12.034581 14.747291 28.301479 |
| C 12.406869 13.965890 21.836975 | C 11.803229 13.568494 27.457157 |
| C 13.034790 12.896029 21.118532 | C 12.272578 12.376285 28.159573 |
| C 14.015150 12.178200 21.877398 | C 13.429718 11.798285 27.515785 |
| C 15.319815 12.371820 21.321180 | C 14.606071 11.838453 28.370754 |
| C 16.223690 13.086031 22.171946 | C 15.638862 12.711903 27.809214 |
| C 15.830561 15.357593 23.719841 | C 15.843996 13.898381 28.635664 |
| C 14.687386 15.974146 24.372166 | C 15.427271 15.105238 27.941418 |
| C 13.519201 15.878510 23.519560 | C 14.256973 15.669621 28.601196 |
| C 12.462809 15.056874 24.083656 | C 11.872277 14.650976 29.686121 |
| C 12.284917 13.872526 23.248884 | C 11.435459 13.369882 30.277369 |
| C 12.697598 12.656906 23.937696 | C 12.122893 12.287653 29.567909 |
| C 13.875240 12.107344 23.296450 | C 13.139916 11.661624 30.366962 |
| C 15.051815 12.119156 24.148163 | C 14.455431 11.752922 29.758846 |
| C 16.057505 13.005383 23.581417 | C 15.356567 12.522413 30.609667 |
| C 16.301376 14.173051 24.418346 | C 15.714805 13.816204 30.037819 |
| C 14.541438 15.864219 25.766754 | C 15.181743 14.955114 30.799837 |
| C 13.219867 15.705297 26.350100 | C 14.119428 15.587092 30.005552 |
| C 12.332273 14.950739 25.474007 | C 12.786123 15.380621 30.549301 |
| C 11.944452 13.668961 26.074511 | C 11.284436 13.260004 31.656588 |
| C 12.562957 12.570578 25.332218 | C 11.801775 12.106417 32.437302 |

C 12.997674 11.554843 31.817936  
C 14.231760 11.456370 32.636520  
C 15.244299 12.392756 31.995070  
C 15.668377 13.558311 32.821465  
C 15.159743 14.942008 32.240116  
C 13.799058 15.635836 32.817822  
C 12.619421 15.283772 31.947746  
C 11.484814 14.502517 32.505417  
Lu 15.096106 17.227413 33.603271  
Lu 11.735652 16.306587 33.927505  
Lu 13.408709 13.418924 33.509274  
Lu 13.124658 17.778879 36.968147  
Lu 17.072184 14.694779 34.102409  
Lu 16.389158 16.656528 36.967705  
Lu 14.050725 15.229807 35.821690  
Lu 10.439326 13.195913 34.019817  
Lu 11.165359 15.041994 36.937618  
Lu 15.845322 11.649729 34.199944  
Lu 13.916684 15.077423 38.820492  
Lu 16.246857 13.412960 37.074463  
Lu 13.111356 12.407562 36.685364

05H60C13Hf

H 12.867951 12.644752 20.061325  
H 15.178881 11.981229 20.211180  
H 16.517780 13.987980 20.269825  
H 15.039267 15.886396 20.159128

H 12.781775 15.055541 20.026440  
C 16.394049 13.998737 21.354149  
C 15.970874 15.194298 22.018023  
C 14.955740 15.844482 21.246578  
C 13.665467 15.853583 21.868572  
C 12.760522 15.036691 21.117485  
C 12.332102 13.858102 21.807823  
C 12.845076 12.693303 21.151344  
C 13.806114 11.964632 21.923227  
C 15.091907 12.049229 21.296957  
C 16.055397 12.794855 22.049923  
C 15.862201 15.194668 23.440048  
C 14.797550 15.938265 24.089970  
C 13.586998 15.844328 23.292885  
C 12.531207 15.104732 23.961636  
C 12.270298 13.875602 23.233713  
C 12.618824 12.688532 23.993383  
C 13.726900 12.007026 23.346268  
C 14.940161 12.024943 24.144205  
C 15.947218 12.826248 23.472239  
C 16.283726 14.034616 24.203913  
C 14.707228 15.936614 25.493408  
C 13.400599 15.912169 26.140696  
C 12.462392 15.109047 25.367359  
C 12.055193 13.905704 26.080334  
C 12.545872 12.715141 25.397877  
C 13.539511 12.000961 26.189156

C 14.845695 12.059415 25.546007  
C 15.804152 12.838333 26.320353  
C 16.179729 14.051365 25.606678  
C 15.721944 15.254795 26.288244  
C 13.320450 15.915961 27.542208  
C 12.282290 15.143618 28.213539  
C 11.980452 13.919949 27.482388  
C 12.360271 12.734533 28.241608  
C 13.454718 12.025397 27.588804  
C 14.672381 12.080580 28.387907  
C 15.706530 12.859756 27.719465  
C 16.017460 14.081924 28.447657  
C 15.629621 15.264123 27.687824  
C 14.539265 15.979554 28.339808  
C 12.198369 15.155661 29.613310  
C 11.794725 13.945426 30.324326  
C 12.277207 12.749114 29.641521  
C 13.278293 12.037045 30.431047  
C 14.587445 12.094858 29.786320  
C 15.547864 12.878162 30.556131  
C 15.933916 14.094699 29.847256  
C 15.473591 15.301023 30.530884  
C 14.454968 15.989695 29.739677  
C 13.145560 15.955621 30.383125  
C 11.667576 13.958940 31.732260  
C 12.008569 12.702071 32.499413  
C 13.184086 12.012937 31.840811

C 14.460995 12.000384 32.649513  
C 15.499611 12.865033 31.967596  
C 15.891263 14.122497 32.712975  
C 15.420519 15.337042 31.941069  
C 14.316889 16.138603 32.599754  
C 13.045625 16.010246 31.790689  
C 11.918400 15.257508 32.465927  
Hf 14.340609 16.610952 34.755417  
Hf 11.424997 15.559805 34.599560  
Hf 13.687872 14.050774 33.136391  
Hf 12.606088 16.456364 37.381729  
Hf 16.236307 14.157678 34.893997  
Hf 15.414240 15.641012 37.545784  
Hf 13.522927 14.092002 36.036507  
Hf 11.521004 12.454715 34.644825  
Hf 10.962048 14.031855 37.322922  
Hf 14.497213 11.595593 34.824913  
Hf 13.366216 14.134550 38.938065  
Hf 15.505628 12.715508 37.591988  
Hf 12.755650 11.720923 37.452744

05H60C13Ta

H 12.851912 12.649752 20.086103  
H 15.170033 11.977084 20.231892  
H 16.518635 13.981349 20.288401  
H 15.032690 15.890760 20.175661  
H 12.761002 15.061355 20.050634

C 16.389568 13.992987 21.372149  
C 15.967295 15.191235 22.034580  
C 14.950276 15.841814 21.262907  
C 13.659615 15.854588 21.888998  
C 12.747898 15.039840 21.141792  
C 12.318411 13.861352 21.834234  
C 12.832773 12.697444 21.176437  
C 13.796307 11.967583 21.944162  
C 15.082927 12.048458 21.317554  
C 16.050798 12.788961 22.070704  
C 15.860427 15.192641 23.455324  
C 14.796266 15.937294 24.107773  
C 13.583284 15.846016 23.313057  
C 12.526274 15.108446 23.985342  
C 12.262218 13.879060 23.259510  
C 12.613137 12.691048 24.017551  
C 13.719088 12.009199 23.366964  
C 14.932923 12.023169 24.163841  
C 15.942643 12.822011 23.491274  
C 16.282742 14.031604 24.221020  
C 14.708821 15.936651 25.511562  
C 13.403943 15.912846 26.161531  
C 12.462524 15.111016 25.391634  
C 12.058061 13.907698 26.105162  
C 12.544736 12.717626 25.423512  
C 13.537513 12.002055 26.212555  
C 14.840940 12.059218 25.567144

C 15.801922 12.837152 26.337923  
C 16.179590 14.049193 25.623146  
C 15.723585 15.253736 26.305891  
C 13.325381 15.915794 27.565498  
C 12.287306 15.145911 28.238199  
C 11.989312 13.921972 27.510551  
C 12.364614 12.737736 28.268032  
C 13.456912 12.029972 27.615713  
C 14.674617 12.080123 28.411438  
C 15.704285 12.859634 27.739552  
C 16.020012 14.079955 28.466679  
C 15.630543 15.261664 27.707735  
C 14.543876 15.980268 28.361530  
C 12.203653 15.159001 29.640713  
C 11.803502 13.949619 30.350872  
C 12.283575 12.752811 29.671566  
C 13.283184 12.038625 30.459673  
C 14.591115 12.095448 29.814255  
C 15.553145 12.877406 30.581047  
C 15.935692 14.092632 29.868671  
C 15.476889 15.298628 30.551102  
C 14.459724 15.990116 29.764259  
C 13.150835 15.960919 30.408318  
C 11.693392 13.964600 31.755968  
C 12.026250 12.715850 32.539570  
C 13.194851 12.031086 31.865744  
C 14.460197 12.024981 32.689919

C 15.493259 12.874977 31.989479  
C 15.858484 14.122439 32.750778  
C 15.413805 15.325867 31.958681  
C 14.315934 16.103443 32.636974  
C 13.058685 16.001205 31.813023  
C 11.946027 15.251002 32.506069  
Ta 14.266554 16.420532 34.795143  
Ta 11.572396 15.434185 34.630623  
Ta 13.682419 14.046279 33.178917  
Ta 12.639732 16.352003 37.127903  
Ta 16.032185 14.154851 34.926460  
Ta 15.343155 15.582802 37.301098  
Ta 13.533695 14.090230 35.907028  
Ta 11.673496 12.568319 34.661037  
Ta 11.087275 14.021733 37.063126  
Ta 14.425079 11.776030 34.843822  
Ta 13.402933 14.145832 38.636326  
Ta 15.432788 12.767136 37.337784  
Ta 12.798462 11.824139 37.191216

05H60C13W

H 12.854149 12.591740 20.127195  
H 15.171665 11.937111 20.273144  
H 16.498821 13.947338 20.304466  
H 15.019251 15.863217 20.176044  
H 12.762819 15.003098 20.067999  
C 16.377472 13.971045 21.388893

C 15.959774 15.175839 22.039047  
C 14.940479 15.821099 21.263626  
C 13.651777 15.828618 21.895788  
C 12.752388 14.993814 21.159344  
C 12.328206 13.821911 21.864964  
C 12.839661 12.652365 21.216890  
C 13.805001 11.929824 21.990257  
C 15.086986 12.017967 21.358248  
C 16.049347 12.773804 22.101986  
C 15.858654 15.192753 23.459248  
C 14.794569 15.941498 24.107300  
C 13.578897 15.833539 23.318686  
C 12.531056 15.090927 24.001919  
C 12.275356 13.852943 23.289919  
C 12.627824 12.673204 24.058195  
C 13.732323 11.985620 23.411610  
C 14.948794 12.017919 24.208572  
C 15.944765 12.821883 23.523680  
C 16.282646 14.039456 24.236355  
C 14.712686 15.957708 25.508736  
C 13.408586 15.927252 26.160097  
C 12.469913 15.107851 25.405519  
C 12.078708 13.907746 26.134090  
C 12.559505 12.709714 25.462490  
C 13.554311 11.998388 26.259417  
C 14.860207 12.068415 25.610052  
C 15.806356 12.872278 26.368372

C 16.184963 14.073325 25.637861  
C 15.735701 15.288282 26.307659  
C 13.336383 15.944875 27.561495  
C 12.311429 15.169835 28.248291  
C 12.014609 13.934993 27.539524  
C 12.388557 12.756601 28.307096  
C 13.475328 12.033405 27.657774  
C 14.694702 12.119350 28.454109  
C 15.708522 12.911501 27.773878  
C 16.028053 14.138871 28.484125  
C 15.649778 15.314087 27.705793  
C 14.556629 16.031420 28.347494  
C 12.239007 15.201070 29.650116  
C 11.856248 13.996723 30.369585  
C 12.308969 12.787039 29.712234  
C 13.301735 12.074727 30.521589  
C 14.608535 12.153666 29.856670  
C 15.526426 12.986320 30.603291  
C 15.937553 14.178119 29.886410  
C 15.495953 15.406833 30.553665  
C 14.477746 16.067440 29.751806  
C 13.186329 16.016506 30.402958  
C 11.755412 14.030310 31.778133  
C 12.053831 12.802901 32.597836  
C 13.213791 12.088821 31.926167  
C 14.485764 12.130483 32.761169  
C 15.457972 13.010577 32.019379

C 15.851889 14.267679 32.738766  
C 15.420012 15.454514 31.955683  
C 14.321971 16.189829 32.680325  
C 13.105821 16.062935 31.812613  
C 12.007552 15.331284 32.491852  
W 14.199807 16.278549 34.856125  
W 11.505975 15.330112 34.518276  
W 13.697633 14.124250 33.226654  
W 12.141255 16.252960 36.646187  
W 16.021151 14.025387 34.800957  
W 15.739299 15.238791 36.852814  
W 13.525237 14.149346 35.983871  
W 11.726320 12.709886 34.711830  
W 11.130932 13.896163 36.984764  
W 14.455809 11.941422 34.898407  
W 13.090397 13.426859 38.474876  
W 15.227111 12.750198 37.299118  
W 12.718954 11.593866 36.898621

05H60C13Re

H 12.864000 12.597974 20.139118  
H 15.170006 11.911665 20.288300  
H 16.501652 13.920752 20.327190  
H 15.024761 15.830091 20.197145  
H 12.759645 15.008159 20.079197  
C 16.376934 13.941417 21.411217  
C 15.954180 15.143168 22.062475



C 14.942504 15.792920 21.284637  
C 13.654785 15.822657 21.912146  
C 12.748270 14.996775 21.170324  
C 12.328274 13.822901 21.875740  
C 12.844757 12.657548 21.228693  
C 13.798871 11.925030 22.003494  
C 15.083118 11.995371 21.372700  
C 16.051119 12.741791 22.120300  
C 15.847715 15.156499 23.485285  
C 14.793637 15.917669 24.129320  
C 13.578932 15.827722 23.333385  
C 12.526366 15.089187 24.012167  
C 12.269100 13.852738 23.299698  
C 12.615649 12.670134 24.069515  
C 13.721600 11.980684 23.425350  
C 14.934628 11.997590 24.222563  
C 15.945618 12.786053 23.539337  
C 16.278389 14.006608 24.258028  
C 14.702558 15.930922 25.529173  
C 13.388480 15.942181 26.172501  
C 12.455317 15.111597 25.413523  
C 12.064543 13.912714 26.139782  
C 12.544213 12.709641 25.471025  
C 13.541032 12.005665 26.270691  
C 14.844584 12.043857 25.624058  
C 15.817403 12.819155 26.388002  
C 16.176989 14.034659 25.657993

C 15.695833 15.232030 26.327360  
C 13.304928 15.969706 27.564594  
C 12.280614 15.185073 28.248384  
C 11.994991 13.946978 27.544090  
C 12.370503 12.771171 28.316555  
C 13.461796 12.049292 27.673710  
C 14.678391 12.102636 28.463961  
C 15.728285 12.851476 27.783016  
C 16.017855 14.092373 28.502165  
C 15.595439 15.250698 27.732750  
C 14.528246 16.002439 28.365789  
C 12.196028 15.227162 29.653959  
C 11.843029 14.027603 30.373455  
C 12.293962 12.812860 29.714869  
C 13.301442 12.133924 30.518454  
C 14.596154 12.136669 29.873466  
C 15.587794 12.892542 30.637104  
C 15.928971 14.118883 29.900221  
C 15.390649 15.292099 30.550255  
C 14.437092 16.034201 29.765762  
C 13.116864 16.085140 30.411938  
C 11.749228 14.062689 31.788193  
C 12.044444 12.832533 32.608849  
C 13.214429 12.151208 31.935846  
C 14.468230 12.107444 32.763424  
C 15.526404 12.905912 32.031712  
C 15.841839 14.180552 32.779064

C 15.305874 15.331945 31.972570  
C 14.270326 16.168846 32.660206  
C 13.023741 16.147367 31.797573  
C 11.966164 15.355367 32.520248  
Re 14.321654 16.308035 34.755768  
Re 11.610017 15.330050 34.558689  
Re 13.686807 14.121817 33.161572  
Re 12.562614 16.307890 36.664394  
Re 15.921273 14.557972 34.794922  
Re 14.661539 15.347263 37.659378  
Re 13.599553 14.015399 35.759903  
Re 11.638755 12.892090 34.663433  
Re 11.510270 14.167367 37.247437  
Re 14.536343 11.843718 34.852909  
Re 13.566357 13.172298 38.125366  
Re 15.751621 13.016209 36.671413  
Re 12.724023 11.557586 36.391197

05H60C13Os

H 12.849288 12.651995 20.121906  
H 15.174325 11.987240 20.264875  
H 16.508453 13.994714 20.322723  
H 15.016022 15.895832 20.211952  
H 12.748073 15.064285 20.092665  
C 16.379896 14.005316 21.406433  
C 15.957151 15.200617 22.070591  
C 14.936838 15.845892 21.299152

C 13.650198 15.854746 21.931026  
C 12.742293 15.037582 21.183678  
C 12.318716 13.858469 21.875381  
C 12.837016 12.700593 21.212109  
C 13.801666 11.971052 21.977842  
C 15.086343 12.059732 21.350176  
C 16.050383 12.801029 22.105492  
C 15.852268 15.201466 23.491873  
C 14.787547 15.939516 24.147047  
C 13.575078 15.844769 23.354166  
C 12.520884 15.105009 24.028006  
C 12.264959 13.874173 23.300201  
C 12.618187 12.686358 24.054783  
C 13.724891 12.008861 23.399576  
C 14.939381 12.028484 24.197971  
C 15.942609 12.833670 23.525742  
C 16.282520 14.042905 24.255013  
C 14.701662 15.941029 25.550055  
C 13.395256 15.920366 26.197803  
C 12.456129 15.108964 25.430231  
C 12.068077 13.899755 26.142586  
C 12.547650 12.708138 25.457941  
C 13.543051 11.986732 26.246532  
C 14.849621 12.059742 25.599043  
C 15.802143 12.846137 26.367794  
C 16.182081 14.058691 25.654572  
C 15.718773 15.260508 26.339842

C 13.318153 15.924944 27.596025  
C 12.285435 15.142735 28.270599  
C 12.002068 13.912523 27.548496  
C 12.375424 12.725361 28.299437  
C 13.463938 12.005907 27.643070  
C 14.683867 12.080053 28.439787  
C 15.705838 12.867612 27.770813  
C 16.025494 14.086836 28.500864  
C 15.628350 15.267538 27.740229  
C 14.537266 15.975702 28.390802  
C 12.208380 15.156267 29.670439  
C 11.857931 13.940577 30.378906  
C 12.300478 12.740229 29.702797  
C 13.289267 12.002989 30.494192  
C 14.598118 12.095894 29.845650  
C 15.529050 12.900060 30.608885  
C 15.937096 14.101895 29.900232  
C 15.464514 15.302868 30.582867  
C 14.453463 15.989961 29.798393  
C 13.145044 15.978193 30.439402  
C 11.754859 13.955299 31.796770  
C 12.075372 12.723289 32.593452  
C 13.197529 11.986080 31.892262  
C 14.447830 12.051187 32.739529  
C 15.462803 12.899472 32.027679  
C 15.836712 14.136374 32.807285  
C 15.398394 15.334393 31.992466

C 14.298079 16.089560 32.685699  
C 13.052945 16.022108 31.840197  
C 11.974627 15.235979 32.558693  
Os 14.216760 16.258366 34.774788  
Os 11.667353 15.365945 34.600548  
Os 13.699570 14.052012 33.139061  
Os 12.662907 16.233168 36.785080  
Os 15.904907 14.150004 34.878265  
Os 15.276622 15.482311 36.962543  
Os 13.524809 14.082081 35.806492  
Os 11.799065 12.653346 34.660984  
Os 11.192726 14.013345 36.723541  
Os 14.404283 11.911370 34.821766  
Os 13.338353 14.152164 38.257114  
Os 15.318290 12.853351 37.035824  
Os 12.856607 11.876287 36.831303

05H60C13Ir

H 12.814389 12.652931 20.116362  
H 15.143219 12.052788 20.257986  
H 16.519539 14.034945 20.318790  
H 15.017181 15.897285 20.215689  
H 12.759659 15.045759 20.098242  
C 16.391037 14.043788 21.402260  
C 15.976567 15.239227 22.075998  
C 14.940400 15.856359 21.303459  
C 13.655143 15.833962 21.933846

C 12.739379 15.028011 21.189430  
C 12.288825 13.858968 21.877508  
C 12.802786 12.700280 21.206280  
C 13.783737 11.990502 21.973331  
C 15.062284 12.109556 21.345024  
C 16.031252 12.841962 22.095751  
C 15.878231 15.236224 23.492048  
C 14.790833 15.946889 24.152700  
C 13.581505 15.824886 23.362774  
C 12.524650 15.093507 24.032333  
C 12.231875 13.870603 23.298563  
C 12.585819 12.677425 24.054461  
C 13.707914 12.026114 23.395458  
C 14.924190 12.065186 24.189054  
C 15.929513 12.867806 23.518608  
C 16.296932 14.064156 24.252766  
C 14.711779 15.943069 25.553061  
C 13.413779 15.867493 26.202824  
C 12.457121 15.092083 25.434237  
C 12.018720 13.888720 26.142611  
C 12.515079 12.695077 25.451939  
C 13.532537 12.000653 26.239489  
C 14.836902 12.089572 25.590227  
C 15.795262 12.867912 26.358625  
C 16.203087 14.075123 25.648746  
C 15.757979 15.287215 26.343863  
C 13.340660 15.862909 27.608904

C 12.288319 15.110436 28.270409  
C 11.942898 13.895102 27.532612  
C 12.335856 12.701486 28.290644  
C 13.451131 12.019224 27.633255  
C 14.672688 12.105186 28.427286  
C 15.704112 12.885942 27.758801  
C 16.054743 14.095775 28.492460  
C 15.679804 15.295930 27.732109  
C 14.558749 15.967204 28.395016  
C 12.205102 15.113633 29.667543  
C 11.744715 13.904491 30.372303  
C 12.247478 12.703834 29.684019  
C 13.279513 12.017061 30.468904  
C 14.591900 12.111097 29.824593  
C 15.542376 12.904420 30.586967  
C 15.983318 14.105191 29.888845  
C 15.551349 15.330907 30.585161  
C 14.484118 15.972512 29.793383  
C 13.191868 15.846044 30.428453  
C 11.628647 13.914568 31.757597  
C 12.093682 12.732897 32.570702  
C 13.192052 11.991655 31.863987  
C 14.439834 12.082314 32.709290  
C 15.485137 12.894342 31.996506  
C 15.821667 14.125179 32.780113  
C 15.501884 15.362821 31.971363  
C 14.334634 16.011776 32.681641

C 13.104197 15.871932 31.848568  
C 12.005562 15.146000 32.551220  
Ir 14.244839 16.312147 34.719162  
Ir 11.679896 15.359946 34.574211  
Ir 13.712737 14.009928 33.204681  
Ir 12.683084 16.236866 36.851810  
Ir 15.945867 14.168247 34.843643  
Ir 15.205842 15.482514 37.042793  
Ir 13.536728 14.101231 35.795059  
Ir 11.764603 12.624023 34.609859  
Ir 11.241641 14.022038 36.808353  
Ir 14.401165 11.907314 34.766453  
Ir 13.358706 14.143568 38.471073  
Ir 15.287427 12.891361 37.078537  
Ir 12.860370 11.992911 36.937366

05H60C13Pt

H 12.850998 12.661228 20.131813  
H 15.159719 11.990693 20.273300  
H 16.493612 13.986061 20.329323  
H 15.016357 15.880722 20.222412  
H 12.757493 15.064146 20.103094  
C 16.376101 13.997317 21.414179  
C 15.955647 15.191491 22.080423  
C 14.939092 15.839866 21.310188  
C 13.654171 15.854807 21.941525  
C 12.743411 15.042413 21.194115

C 12.317749 13.864241 21.884922  
C 12.831912 12.705008 21.222113  
C 13.792858 11.972873 21.988186  
C 15.076193 12.055266 21.359497  
C 16.042238 12.794558 22.113182  
C 15.854342 15.192550 23.503569  
C 14.793750 15.936483 24.159451  
C 13.580091 15.845243 23.365494  
C 12.525556 15.107679 24.038542  
C 12.261564 13.878736 23.310030  
C 12.614073 12.690065 24.065950  
C 13.717948 12.010231 23.411524  
C 14.932809 12.023953 24.209614  
C 15.938118 12.825064 23.534790  
C 16.279650 14.032532 24.265766  
C 14.710268 15.938358 25.560873  
C 13.403584 15.915068 26.208961  
C 12.460019 15.112056 25.440336  
C 12.054753 13.904837 26.151926  
C 12.541935 12.711827 25.467758  
C 13.539348 11.998039 26.258787  
C 14.844820 12.054766 25.610037  
C 15.807300 12.833699 26.381067  
C 16.182608 14.048233 25.665749  
C 15.725214 15.251094 26.351959  
C 13.326929 15.916576 27.606846  
C 12.289256 15.143296 28.277565

C 11.986166 13.918221 27.551079  
C 12.367858 12.733840 28.309793  
C 13.460737 12.022741 27.657261  
C 14.681231 12.077351 28.452702  
C 15.713786 12.855301 27.779005  
C 16.022886 14.077459 28.510126  
C 15.634197 15.258963 27.750172  
C 14.546053 15.977552 28.403957  
C 12.198404 15.161568 29.677343  
C 11.788693 13.947439 30.381489  
C 12.281002 12.746050 29.709898  
C 13.286029 12.029238 30.494959  
C 14.600262 12.087147 29.854422  
C 15.570860 12.868574 30.620295  
C 15.945193 14.092280 29.912029  
C 15.484447 15.304518 30.587620  
C 14.462166 15.996954 29.804195  
C 13.145748 15.973467 30.440397  
C 11.647561 13.961948 31.781965  
C 12.053509 12.737751 32.586086  
C 13.187231 11.992356 31.899626  
C 14.452390 12.053700 32.737759  
C 15.532406 12.853254 32.028023  
C 15.844180 14.125693 32.797081  
C 15.444016 15.353170 31.994551  
C 14.308212 16.092886 32.681816  
C 13.042089 16.040529 31.842304

C 11.965663 15.235198 32.549675  
Pt 14.283824 16.451591 34.648949  
Pt 11.556400 15.455496 34.494541  
Pt 13.711422 14.051856 32.887718  
Pt 12.669469 16.289825 36.866119  
Pt 16.069435 14.159419 34.784996  
Pt 15.291944 15.535688 37.034721  
Pt 13.540881 14.087605 35.640266  
Pt 11.655971 12.553399 34.537045  
Pt 11.141369 14.021671 36.801937  
Pt 14.452318 11.754321 34.715931  
Pt 13.375153 14.121701 38.372997  
Pt 15.385963 12.803139 37.075912  
Pt 12.821389 11.868061 36.928368

05H60C13Au

H 12.813511 12.733389 20.031422  
H 15.122799 12.098443 20.144955  
H 16.442719 14.108082 20.217731  
H 14.947860 15.987359 20.155977  
H 12.706395 15.138418 20.036728  
C 16.336136 14.099767 21.303658  
C 15.909359 15.278490 21.993990  
C 14.879091 15.927979 21.243464  
C 13.598827 15.915007 21.883057  
C 12.695713 15.102949 21.127249  
C 12.286053 13.910903 21.804726

C 12.801090 12.763866 21.122156  
C 13.776209 12.034241 21.873180  
C 15.050518 12.145107 21.232857  
C 16.016659 12.882876 21.985735  
C 15.819070 15.255689 23.418049  
C 14.755336 15.976263 24.094320  
C 13.538015 15.881863 23.308537  
C 12.496798 15.123572 23.977770  
C 12.238928 13.904576 23.231613  
C 12.606439 12.709440 23.971924  
C 13.713466 12.053576 23.298725  
C 14.934546 12.071133 24.084372  
C 15.925330 12.891052 23.411077  
C 16.260969 14.088372 24.160801  
C 14.680661 15.954558 25.496424  
C 13.380160 15.909257 26.155914  
C 12.438780 15.109398 25.380911  
C 12.051730 13.889755 26.081244  
C 12.548023 12.712399 25.375341  
C 13.560679 11.998078 26.147640  
C 14.859007 12.079457 25.487307  
C 15.820370 12.853522 26.264786  
C 16.175888 14.081413 25.563332  
C 15.710071 15.269407 26.270687  
C 13.313371 15.896631 27.555817  
C 12.290708 15.102662 28.225807  
C 11.990388 13.884143 27.480841

C 12.393946 12.689933 28.217134  
C 13.493008 12.000849 27.546694  
C 14.719731 12.058796 28.332359  
C 15.743143 12.853207 27.664190  
C 16.047009 14.070719 28.409630  
C 15.633286 15.259196 27.670378  
C 14.540689 15.955862 28.341948  
C 12.224534 15.090428 29.628822  
C 11.869173 13.869452 30.323635  
C 12.323911 12.685989 29.616678  
C 13.352654 12.022549 30.397305  
C 14.642482 12.062943 29.735958  
C 15.566319 12.863166 30.515574  
C 15.974216 14.065282 29.810032  
C 15.473934 15.231742 30.514221  
C 14.469005 15.940688 29.745302  
C 13.185759 15.840489 30.416182  
C 11.785233 13.858864 31.734810  
C 12.155427 12.662315 32.467701  
C 13.281108 12.017089 31.812967  
C 14.485082 12.071043 32.613167  
C 15.491574 12.855860 31.931675  
C 15.851902 14.057446 32.663975  
C 15.412890 15.228645 31.927229  
C 14.340970 15.915811 32.615288  
C 13.116405 15.823931 31.836735  
C 12.068103 15.058327 32.491707

Au 14.323097 16.205761 34.615700  
Au 11.692711 15.215515 34.471718  
Au 14.364463 15.546702 37.318714  
Au 12.370909 17.136854 36.363739  
Au 16.228798 14.155955 34.633324  
Au 16.972408 15.021380 37.068672  
Au 11.823128 14.596202 37.180687  
Au 11.616523 12.417712 34.385063  
Au 10.248716 12.492844 36.700291  
Au 14.445389 11.880636 34.634830  
Au 13.528769 13.640678 39.115074  
Au 15.353357 12.839341 37.032921  
Au 12.898568 11.916703 36.897858

05H60C13Hg

H 12.906652 12.678206 20.002163  
H 15.193443 11.932259 20.134754  
H 16.436825 14.041457 20.172165  
H 15.011737 15.965709 20.087887  
H 12.809790 15.080078 19.973700  
C 16.362686 14.047259 21.260960  
C 15.946344 15.241618 21.932264  
C 14.941025 15.921234 21.176031  
C 13.652279 15.920857 21.812189  
C 12.780808 15.067922 21.064953  
C 12.376641 13.883206 21.752577  
C 12.876897 12.712597 21.092878

C 13.817236 11.959414 21.855354  
C 15.114450 12.012388 21.219952  
C 16.032629 12.845846 21.950081  
C 15.852749 15.245503 23.355310  
C 14.800431 15.993532 24.021393  
C 13.579259 15.911675 23.231831  
C 12.547720 15.135528 23.904928  
C 12.310112 13.903460 23.180639  
C 12.660384 12.718127 23.930719  
C 13.743015 12.001005 23.271290  
C 14.970983 12.030800 24.062731  
C 15.939328 12.871099 23.377512  
C 16.267958 14.077091 24.107695  
C 14.727049 15.988157 25.421247  
C 13.424534 15.943511 26.082203  
C 12.490205 15.136271 25.308899  
C 12.105749 13.926777 26.020691  
C 12.588717 12.733203 25.334736  
C 13.586629 12.008878 26.117767  
C 14.891156 12.064743 25.459061  
C 15.829601 12.875339 26.226084  
C 16.196123 14.086962 25.510553  
C 15.753683 15.295773 26.199196  
C 13.366496 15.933561 27.483427  
C 12.374831 15.134290 28.177530  
C 12.032419 13.934270 27.421280  
C 12.404599 12.731258 28.154482



C 13.511442 12.028983 27.514246  
C 14.724266 12.136402 28.322111  
C 15.744975 12.899746 27.628466  
C 16.075630 14.117451 28.345276  
C 15.696434 15.317784 27.591633  
C 14.596145 16.037148 28.256525  
C 12.327496 15.109958 29.596968  
C 11.840609 13.905085 30.245869  
C 12.279125 12.701048 29.544266  
C 13.301482 12.020411 30.333578  
C 14.620673 12.173890 29.735313  
C 15.492359 13.035255 30.527721  
C 16.033573 14.162919 29.746523  
C 15.688309 15.450299 30.335403  
C 14.564298 16.076818 29.649704  
C 13.309874 15.833185 30.397446  
C 11.731314 13.874802 31.653454  
C 12.039880 12.651693 32.379108  
C 13.173107 12.005112 31.741123  
C 14.254167 12.350105 32.592659

C 15.232906 13.154557 31.951494  
C 15.515882 14.446785 32.546173  
C 15.728943 15.549818 31.711761  
C 14.580927 15.708813 32.540924  
C 13.286338 15.660869 31.834942  
C 12.258719 14.918300 32.460384  
Hg 14.409088 16.902094 34.663589  
Hg 10.631161 16.415079 34.741817  
Hg 12.878334 13.448750 34.290642  
Hg 12.382738 17.273071 37.727905  
Hg 16.562725 14.073692 34.785290  
Hg 15.999101 16.100172 37.947731  
Hg 13.569016 14.290638 36.788971  
Hg 10.000162 11.222556 35.035568  
Hg 10.219495 14.060037 37.505791  
Hg 15.081247 10.305652 34.969414  
Hg 13.212845 14.135659 39.838234  
Hg 16.159731 12.388756 37.903671  
Hg 12.582316 11.065742 37.769196

We provide the atomic positions (xyz coordinates) of the  $\text{TM}_{13}$  nanoclusters composed by all *3d*, *4d*, and *5d* elements obtained by DFT-PBE-D3-SOC as implemented in VASP.

13Sc  
Sc 15.575329 14.513142 17.214172  
Sc 15.035522 17.267540 18.658884

Sc 17.891430 15.930015 18.824642  
Sc 13.884626 16.750471 15.764420  
Sc 18.505980 14.588339 16.034237

Sc 16.028242 15.096640 14.142237  
Sc 16.829241 17.070650 16.258900  
Sc 18.622957 16.873753 13.858918  
Sc 15.767050 18.211287 13.693169  
Sc 15.152501 19.552950 16.483562  
Sc 17.630239 19.044651 18.375574  
Sc 19.773853 17.390818 16.753391  
Sc 18.083151 19.628157 15.303637

13Ti

Ti 1.765145 0.863309 17.119303  
Ti 1.335012 3.324016 18.396446  
Ti 3.861928 2.136607 18.479509  
Ti 0.246538 2.863062 15.864744  
Ti 4.336219 0.942003 15.999476  
Ti 2.102419 1.390565 14.384016  
Ti 2.829241 3.070650 16.258900  
Ti 4.323469 2.817284 14.121355  
Ti 1.796552 4.004684 14.038299  
Ti 1.322261 5.199286 16.518332  
Ti 3.556062 4.750736 18.133793  
Ti 5.411942 3.278238 16.653067  
Ti 3.893335 5.277981 15.398500

13V

V 1.797465 1.219423 17.176270  
V 1.353187 3.118291 18.318169

V 3.754744 2.291046 18.445034  
V 0.349222 2.976837 15.984899  
V 4.350247 1.292660 16.081087  
V 2.112281 1.742626 14.463104  
V 2.829241 3.070650 16.258900  
V 4.305294 3.023009 14.199640  
V 1.903735 3.850245 14.072777  
V 1.308233 4.848630 16.436722  
V 3.546199 4.398674 18.054707  
V 5.309256 3.164452 16.532911  
V 3.861016 4.921877 15.341541

13Cr

Cr 1.742573 0.838220 17.132729  
Cr 1.761868 3.024344 18.402693  
Cr 3.869158 2.062695 18.459505  
Cr 0.577638 2.527297 15.651253  
Cr 3.864957 0.910996 16.207184  
Cr 2.127355 1.330778 14.412259  
Cr 2.829241 3.070650 16.258900  
Cr 3.896613 3.116956 14.115120  
Cr 1.789322 4.078593 14.058306  
Cr 1.793523 5.230294 16.310629  
Cr 3.531126 4.810512 18.105541  
Cr 5.080841 3.614003 16.866560  
Cr 3.915906 5.303079 15.385080

13Mn

Mn 1.870080 1.021647 17.109804  
Mn 1.363415 3.190125 18.402071  
Mn 3.707074 2.127691 18.306387  
Mn 0.590215 2.848076 15.970486  
Mn 4.235255 0.904182 16.108217  
Mn 2.199149 1.561776 14.679757  
Mn 2.829241 3.070650 16.258900  
Mn 4.295065 2.951165 14.115739  
Mn 1.951405 4.013597 14.211422  
Mn 1.423224 5.237118 16.409595  
Mn 3.459332 4.579513 17.838043  
Mn 5.068264 3.293215 16.547323  
Mn 3.788401 5.119654 15.408005

13Fe

Fe 1.874903 1.063120 17.036116  
Fe 1.570861 3.199713 18.219971  
Fe 3.738516 2.113474 18.275112  
Fe 0.547432 2.912959 15.901602  
Fe 4.152771 1.069155 16.082674  
Fe 2.249198 1.494194 14.639462  
Fe 2.829241 3.070650 16.258900  
Fe 4.087619 2.941587 14.297839  
Fe 1.919963 4.027816 14.242699  
Fe 1.505709 5.072134 16.435135  
Fe 3.409281 4.647096 17.878347

Fe 5.111049 3.228343 16.616196

Fe 3.783578 5.078179 15.481683

13Co

Co 1.918845 1.085664 16.996561  
Co 1.493787 3.232471 18.127760  
Co 3.641980 2.211061 18.227346  
Co 0.564540 2.767724 15.955435  
Co 4.060336 1.136809 16.010778  
Co 2.123632 1.557446 14.669459  
Co 2.829241 3.070650 16.258900  
Co 4.164693 2.908820 14.390051  
Co 2.016500 3.930229 14.290464  
Co 1.598144 5.004482 16.507032  
Co 3.534848 4.583842 17.848352  
Co 5.093941 3.373566 16.562374  
Co 3.739635 5.055637 15.521248

13Ni

Ni 1.871728 1.078020 17.002729  
Ni 1.475565 3.218178 18.122265  
Ni 3.701644 2.172476 18.197889  
Ni 0.533703 2.825935 15.952356  
Ni 4.126512 1.142426 16.077034  
Ni 2.167469 1.534289 14.669310  
Ni 2.829241 3.070650 16.258900  
Ni 4.182916 2.923113 14.395545

Ni 1.956835 3.968815 14.319919  
Ni 1.531968 4.998876 16.440767  
Ni 3.491010 4.607001 17.848501  
Ni 5.124776 3.315356 16.565454  
Ni 3.786753 5.063269 15.515081

### 13Cu

Cu 1.845062 1.028949 17.051310  
Cu 1.449359 3.232922 18.216459  
Cu 3.733073 2.159025 18.287525  
Cu 0.464358 2.820082 15.929809  
Cu 4.158824 1.083180 16.044945  
Cu 2.138457 1.492079 14.587105  
Cu 2.829241 3.070650 16.258900  
Cu 4.209120 2.908378 14.301352  
Cu 1.925408 3.982266 14.230286  
Cu 1.499657 5.058119 16.472857  
Cu 3.520023 4.649210 17.930706  
Cu 5.194122 3.321218 16.587992  
Cu 3.813419 5.112350 15.466497

### 13Zn

Zn 15.593801 14.543217 17.235647  
Zn 15.129402 17.280365 18.694336  
Zn 17.947754 15.936098 18.756392  
Zn 13.915940 16.751108 15.859512  
Zn 18.484030 14.607304 16.008289

Zn 15.989948 15.122842 14.190655  
Zn 16.829241 17.070650 16.258900  
Zn 18.529078 16.860935 13.823463  
Zn 15.710727 18.205193 13.761418  
Zn 15.174452 19.533987 16.509521  
Zn 17.668531 19.018448 18.327156  
Zn 19.742540 17.390192 16.658298  
Zn 18.064678 19.598083 15.282152

### 13Y

Y 15.422443 14.269724 17.331465  
Y 14.868258 17.320286 18.912851  
Y 18.001465 15.811725 19.085728  
Y 13.576104 16.750181 15.731050  
Y 18.649944 14.313865 16.014336  
Y 15.911713 14.892768 13.941000  
Y 16.829241 17.070650 16.258900  
Y 18.790222 16.821005 13.604960  
Y 15.657014 18.329565 13.432074  
Y 15.008536 19.827436 16.503475  
Y 17.746767 19.248524 18.576811  
Y 20.082375 17.391117 16.786758  
Y 18.236038 19.871565 15.186344

### 13Zr

Zr 15.728557 14.604703 17.233170  
Zr 15.284309 17.238579 18.669487

Zr 17.980452 16.051994 18.681494  
Zr 13.984066 16.765934 15.980330  
Zr 18.476669 14.741290 15.983276  
Zr 15.958402 15.122153 14.343241  
Zr 16.829241 17.070650 16.258900  
Zr 18.374170 16.902710 13.848315  
Zr 15.678026 18.089306 13.836315  
Zr 15.181812 19.400000 16.534533  
Zr 17.700077 19.019136 18.174570  
Zr 19.674414 17.375355 16.537481  
Zr 17.929922 19.536587 15.284631

### 13Nb

Nb 1.951703 0.765818 17.174316  
Nb 1.501656 3.412740 18.456398  
Nb 3.947765 2.128620 18.654123  
Nb 0.315719 2.793139 15.593289  
Nb 4.200588 0.732613 16.112698  
Nb 2.055660 1.221163 14.294991  
Nb 2.829241 3.070650 16.258900  
Nb 4.156823 2.728560 14.061413  
Nb 1.710714 4.012680 13.863686  
Nb 1.457893 5.408677 16.405111  
Nb 3.602821 4.920127 18.222820  
Nb 5.342762 3.348150 16.924519  
Nb 3.706778 5.375472 15.343493

### 13Mo

Mo 1.592409 1.202857 17.500767  
Mo 1.303701 3.256125 18.461777  
Mo 3.840052 1.994844 18.507179  
Mo 0.191500 2.741940 15.866820  
Mo 4.688284 1.309913 16.152014  
Mo 1.970178 1.864706 14.174608  
Mo 2.829241 3.070650 16.258909  
Mo 4.354780 2.885166 14.056032  
Mo 1.818428 4.146456 14.010632  
Mo 0.970196 4.831388 16.365797  
Mo 3.688303 4.276593 18.343201  
Mo 5.466980 3.399351 16.650990  
Mo 4.066072 4.938434 15.017044

### 13Tc

Tc 1.705072 0.855787 16.927633  
Tc 1.194505 3.204674 18.191975  
Tc 3.795354 2.104098 18.307556  
Tc 0.332242 2.641453 15.945065  
Tc 4.165473 0.976869 15.735432  
Tc 2.040991 1.355829 14.543651  
Tc 2.829241 3.070650 16.258900  
Tc 4.463974 2.936617 14.325825  
Tc 1.863126 4.037201 14.210254  
Tc 1.493008 5.164433 16.782379  
Tc 3.617489 4.785472 17.974150

Tc 5.326238 3.499845 16.572746

Tc 3.953408 5.285503 15.590175

### 13Ru

Ru 1.809120 0.950695 17.083529

Ru 1.395001 3.232400 18.288977

Ru 3.765560 2.124919 18.364584

Ru 0.374191 2.809353 15.916661

Ru 4.208317 1.012943 16.033913

Ru 2.114462 1.436796 14.528068

Ru 2.829241 3.070650 16.258900

Ru 4.263478 2.908900 14.228834

Ru 1.892920 4.016382 14.153228

Ru 1.450163 5.128358 16.483898

Ru 3.544020 4.704494 17.989733

Ru 5.284288 3.331936 16.601149

Ru 3.849359 5.190596 15.434280

### 13Rh

Rh 1.795373 0.909646 17.092699

Rh 1.353323 3.248523 18.326929

Rh 3.793901 2.086728 18.407991

Rh 0.322133 2.812622 15.920892

Rh 4.227054 0.979161 16.036707

Rh 2.101751 1.377926 14.493818

Rh 2.829241 3.070650 16.258900

Rh 4.305157 2.892766 14.190881

Rh 1.864578 4.054560 14.109818

Rh 1.431425 5.162129 16.481091

Rh 3.556729 4.763363 18.023991

Rh 5.336349 3.328678 16.596920

Rh 3.863106 5.231656 15.425110

### 13Pd

Pd 1.803033 0.857103 17.100496

Pd 1.369527 3.272504 18.377964

Pd 3.852073 2.050502 18.536148

Pd 0.289501 2.818862 15.870559

Pd 4.316242 0.835359 16.023661

Pd 2.061337 1.298834 14.377062

Pd 2.829241 3.070650 16.258900

Pd 4.288953 2.868796 14.139847

Pd 1.806408 4.090798 13.981659

Pd 1.342238 5.305932 16.494148

Pd 3.597143 4.842466 18.140739

Pd 5.368980 3.322429 16.647242

Pd 3.855446 5.284185 15.417313

### 13Ag

Ag 1.693363 0.713115 17.177256

Ag 1.235139 3.258416 18.519484

Ag 3.874346 2.018173 18.603975

Ag 0.097535 2.780386 15.877230

Ag 4.365759 0.775149 16.011986

Ag 2.031623 1.246666 14.327800  
Ag 2.829241 3.070650 16.258900  
Ag 4.423341 2.882884 13.998325  
Ag 1.784135 4.123127 13.913833  
Ag 1.292720 5.366142 16.505823  
Ag 3.626857 4.894634 18.190002  
Ag 5.560946 3.360905 16.640572  
Ag 3.965116 5.428173 15.340555

### 13Cd

Cd 15.368800 14.005666 45.443642  
Cd 14.762527 17.318851 47.182304  
Cd 18.168444 15.710871 47.303398  
Cd 13.304740 16.692883 43.759315  
Cd 18.813566 14.090014 43.940533  
Cd 15.797910 14.704220 41.753380  
Cd 16.829241 17.070650 44.258900  
Cd 18.895954 16.822441 41.335495  
Cd 15.490036 18.430420 41.214409  
Cd 14.844913 20.051277 44.577271  
Cd 17.860569 19.437080 46.764435  
Cd 20.353739 17.448410 44.758492  
Cd 18.289680 20.135624 43.074158

### 13Lu

Lu 15.500263 14.383204 45.403549  
Lu 15.012271 17.255962 46.907619

Lu 17.990593 15.869074 47.012432  
Lu 13.715356 16.665026 43.815441  
Lu 18.575558 14.437923 43.969944  
Lu 15.918982 15.032913 41.958721  
Lu 16.829241 17.070650 44.258900  
Lu 18.646210 16.885330 41.610180  
Lu 15.667889 18.272217 41.505379  
Lu 15.082924 19.703365 44.547867  
Lu 17.739496 19.108387 46.559090  
Lu 19.943115 17.476263 44.702366  
Lu 18.158218 19.758087 43.114262

### 13Hf

Hf 1.750181 0.616257 17.203480  
Hf 1.195024 3.238860 18.618221  
Hf 3.900447 2.016013 18.642544  
Hf 0.046963 2.796075 15.847599  
Hf 4.433764 0.749773 16.043665  
Hf 1.963135 1.207233 14.289242  
Hf 2.829241 3.070650 16.258900  
Hf 4.463456 2.902430 13.899588  
Hf 1.758033 4.125277 13.875265  
Hf 1.224717 5.391516 16.474134  
Hf 3.695345 4.934056 18.228569  
Hf 5.611518 3.345214 16.670212  
Hf 3.908301 5.525043 15.314329

13Ta

Ta 1.749465 0.792247 17.146498  
Ta 1.295142 3.215847 18.450474  
Ta 3.859195 2.059254 18.510057  
Ta 0.194092 2.781753 15.885148  
Ta 4.332823 0.873039 16.023239  
Ta 2.051620 1.331288 14.384646  
Ta 2.829241 3.070650 16.258900  
Ta 4.363339 2.925443 14.067335  
Ta 1.799284 4.082046 14.007740  
Ta 1.325655 5.268251 16.494572  
Ta 3.606859 4.810012 18.133163  
Ta 5.464388 3.359547 16.632660  
Ta 3.909016 5.349044 15.371313

13W

W 1.731130 0.852561 16.604784  
W 1.170847 3.655649 18.172518  
W 4.243584 2.254832 18.297689  
W 0.131065 2.776568 15.918686  
W 4.344951 0.838511 16.076302  
W 2.128721 1.447047 14.262154  
W 2.829241 3.070650 16.258900  
W 4.487632 2.485642 14.345293  
W 1.414897 3.886468 14.220120  
W 1.313529 5.302777 16.441509  
W 3.529757 4.694253 18.255646

W 5.527414 3.364723 16.599125

W 3.927350 5.288727 15.913026

13Re

Re 1.772424 0.916118 17.088404  
Re 1.321412 3.220719 18.312294  
Re 3.785293 2.096060 18.393833  
Re 0.308989 2.811323 15.947748  
Re 4.267295 0.989530 16.008316  
Re 2.110886 1.411356 14.483706  
Re 2.829241 3.070650 16.258900  
Re 4.337069 2.920572 14.205515  
Re 1.873188 4.045240 14.123978  
Re 1.391185 5.151760 16.509495  
Re 3.547594 4.729943 18.034103  
Re 5.349493 3.329978 16.570061  
Re 3.886057 5.225182 15.429407

13Os

Os 1.760243 0.935359 17.021002  
Os 1.428400 3.169351 18.366404  
Os 3.770598 2.022132 18.355104  
Os 0.345118 2.811540 15.834675  
Os 4.297159 1.057651 15.932109  
Os 2.114465 1.443568 14.465431  
Os 2.829241 3.070650 16.258900  
Os 4.230079 2.971949 14.151397



Os 1.887883 4.119159 14.162704  
Os 1.361322 5.083649 16.585701  
Os 3.544016 4.697732 18.052380  
Os 5.313363 3.329751 16.683136  
Os 3.898237 5.205930 15.496807

### 13Ir

Ir 1.802227 0.937072 17.142015  
Ir 1.328082 3.255771 18.284130  
Ir 3.808117 2.088579 18.429146  
Ir 0.317645 2.739259 15.932857  
Ir 4.203738 0.947643 15.985648  
Ir 2.128270 1.406629 14.465543  
Ir 2.829241 3.070650 16.258909  
Ir 4.330398 2.885529 14.233668  
Ir 1.850363 4.052721 14.088663  
Ir 1.454742 5.193658 16.532162  
Ir 3.530212 4.734670 18.052267  
Ir 5.340836 3.402032 16.584944  
Ir 3.856252 5.204229 15.375793

### 13Pt

Pt 1.768033 0.859998 17.125336  
Pt 1.306171 3.247876 18.452831  
Pt 3.816576 2.071118 18.512997  
Pt 0.272969 2.809296 15.904360  
Pt 4.261611 0.920923 16.023054

Pt 2.088405 1.339690 14.421114  
Pt 2.829241 3.070650 16.258900  
Pt 4.352309 2.893424 14.064981  
Pt 1.841904 4.070171 14.004813  
Pt 1.396869 5.220378 16.494757  
Pt 3.570077 4.801610 18.096685  
Pt 5.385511 3.332004 16.613451  
Pt 3.890447 5.281292 15.392475

### 13Au

Au 1.701612 0.699265 17.168961  
Au 1.247215 3.260470 18.501547  
Au 3.864785 2.010634 18.582834  
Au 0.118478 2.778644 15.880508  
Au 4.354420 0.762877 16.012897  
Au 2.038720 1.236208 14.344837  
Au 2.829241 3.070650 16.258900  
Au 4.411265 2.880821 14.016262  
Au 1.793694 4.130653 13.934976  
Au 1.304061 5.378413 16.504913  
Au 3.619759 4.905081 18.172962  
Au 5.540000 3.362647 16.637302  
Au 3.956868 5.442025 15.348839

### 13Hg

Hg 15.377580 14.000903 45.387299  
Hg 14.733319 17.263012 47.133911

Hg 18.135378 15.709266 47.279404  
Hg 13.326102 16.656122 43.719337  
Hg 18.847237 14.138782 43.949127  
Hg 15.868284 14.725914 41.745945  
Hg 16.829241 17.070650 44.258900  
Hg 18.925159 16.878277 41.383896

Hg 15.523104 18.432026 41.238411  
Hg 14.811243 20.002520 44.568680  
Hg 17.790195 19.415377 46.771866  
Hg 20.332376 17.485178 44.798462  
Hg 18.280901 20.140387 43.130512

Here, we provided the atomic positions (xyz coordinates) of the five-layered hydrogen-terminated fragment for the (3,3) armchair CNT and tree-layered hydrogen terminated fragment for the (5,0) zigzag CNT obtained by DFT-PBE-vdW-SOC.

| 6H60C                           |                                 |
|---------------------------------|---------------------------------|
| H 13.005339 16.468914 22.144638 | C 12.415905 12.683487 24.247908 |
| H 11.389912 14.545991 22.147240 | C 15.035376 12.228824 24.244171 |
| H 15.792711 15.991688 22.150881 | C 15.928272 13.287804 24.242260 |
| H 16.652323 13.630962 22.146757 | C 12.957834 15.803468 25.509703 |
| H 14.823399 11.453792 22.150383 | C 12.038196 14.713866 25.509796 |
| H 12.349002 11.882095 22.153847 | C 12.959207 12.195413 25.512350 |
| C 16.193329 14.080676 23.027973 | C 14.363142 11.946157 25.510588 |
| C 15.731491 15.350370 23.030842 | C 16.085907 13.999823 25.508753 |
| C 12.839761 15.852162 23.028719 | C 15.599827 15.340401 25.510559 |
| C 11.969955 14.817511 23.029978 | C 11.875553 14.003577 26.740343 |
| C 12.968205 12.056302 23.034451 | C 12.376068 12.634940 26.741928 |
| C 14.299779 11.824984 23.032225 | C 15.060675 12.159607 26.740080 |
| C 15.018500 15.783732 24.246199 | C 15.998642 13.274532 26.738808 |
| C 13.654435 16.024345 24.245087 | C 15.064177 15.835799 26.740396 |
| C 11.946064 13.986931 24.246315 | C 13.629359 16.089897 26.739447 |
|                                 | C 12.951795 12.180631 27.966057 |

C 14.364069 11.930295 27.965181  
C 16.104254 14.000517 27.963556  
C 15.611677 15.347245 27.965010  
C 12.947358 15.821362 27.964371  
C 12.025287 14.723168 27.964737  
C 15.041893 12.206817 29.215240  
C 15.951303 13.283712 29.214649  
C 15.031120 15.796709 29.214043  
C 13.644578 16.045212 29.214937  
C 11.929665 13.998074 29.215166  
C 12.408370 12.673538 29.215616  
C 16.087337 14.000588 30.467669  
C 15.603815 15.343401 30.467100  
C 12.954837 15.810571 30.467896  
C 12.031543 14.722116 30.468355  
C 12.956669 12.194352 30.468189  
C 14.361127 11.940164 30.467693  
C 15.067332 15.839093 31.698166  
C 13.630624 16.091452 31.699623  
C 11.869676 14.010068 31.699455  
C 12.371658 12.639624 31.698547  
C 15.057214 12.156637 31.698589  
C 15.994059 13.273767 31.699036  
C 12.892202 15.867536 32.940723  
C 11.966765 14.778514 32.941593  
C 12.934795 12.111907 32.938885  
C 14.342317 11.854381 32.939575

C 16.168402 14.025556 32.939404  
C 15.686209 15.372191 32.939556  
C 11.875175 13.888199 34.035908  
C 12.279177 12.712198 34.041695  
C 15.156781 12.223863 34.033085  
C 15.982123 13.154372 34.041920

#### 60C5H

H 12.310753 15.216245 34.235756  
H 14.617910 15.921550 34.251255  
H 16.042645 13.973272 34.250999  
H 12.319292 12.803721 34.231586  
H 14.623028 12.023699 34.240917  
C 15.478099 13.558344 21.893448  
C 15.175496 14.847034 22.392265  
C 14.046200 15.545435 21.896118  
C 13.199313 16.303982 22.685192  
C 12.608005 15.336711 21.793839  
C 12.134204 14.102478 22.428019  
C 12.521804 12.930779 21.797764  
C 13.499383 12.176304 22.423195  
C 14.824375 12.250908 21.803181  
C 15.923927 12.516928 22.688269  
C 15.491633 15.076426 23.836731  
C 14.630762 15.969997 24.631014  
C 13.292558 16.202772 24.054131  
C 12.300065 15.321989 24.676243

|                                 |                                 |
|---------------------------------|---------------------------------|
| C 12.064726 14.108786 23.877319 | C 16.048519 13.999038 28.907261 |
| C 12.485250 12.900082 24.579567 | C 15.660821 15.197703 28.181553 |
| C 13.484674 12.103690 23.873343 | C 14.647176 15.943282 28.904840 |
| C 14.713662 11.970195 24.677038 | C 12.342568 15.220369 30.293888 |
| C 15.853385 12.638488 24.059145 | C 11.980034 14.011271 31.014507 |
| C 16.063871 13.975745 24.634863 | C 12.331177 12.799366 30.292475 |
| C 14.660942 15.953850 26.042051 | C 13.370694 12.089222 31.020576 |
| C 13.386240 16.002579 26.779249 | C 14.631533 12.043091 30.299273 |
| C 12.340458 15.254821 26.067265 | C 15.636569 12.801427 31.030224 |
| C 11.995140 14.025207 26.756983 | C 16.062782 13.993776 30.311352 |
| C 12.426389 12.861516 26.005743 | C 15.629988 15.171711 31.035923 |
| C 13.386741 12.080120 26.763065 | C 14.646942 15.953147 30.310951 |
| C 14.660229 12.033463 26.071146 | C 13.383201 15.922933 31.027561 |
| C 15.695978 12.787191 26.782944 | C 11.944144 14.009057 32.437901 |
| C 16.056091 14.009954 26.044907 | C 12.379038 12.841723 33.142563 |
| C 15.648325 15.190102 26.771723 | C 13.357722 12.063305 32.445175 |
| C 13.383908 15.984332 28.174984 | C 14.604209 12.094775 33.152267 |
| C 12.361591 15.215853 28.889214 | C 15.650963 12.780825 32.451439 |
| C 11.968170 14.014302 28.163143 | C 15.984765 13.977924 33.161182 |
| C 12.354455 12.814482 28.888941 | C 15.647043 15.182057 32.463184 |
| C 13.368954 12.062208 28.167791 | C 14.607184 15.871402 33.161205 |
| C 14.633123 12.058653 28.895592 |                                 |
| C 15.681181 12.788455 28.179443 |                                 |

Here, we provided the atomic positions of the lowest energy configurations for the armchair CNT fragment (3,3) and the zigzag (5,0) CNT fragment, respectively, adhered to *3d*, *4d*, and *5d* TM<sub>13</sub> nanoclusters, obtained by DFT-PBE-D3-SOC.

06H60C13Sc

|                                 |                                 |
|---------------------------------|---------------------------------|
| H 13.404928 16.224073 20.537170 | C 15.056719 12.204233 25.446785 |
| H 11.800587 14.320743 20.513891 | C 15.984571 13.311474 25.462231 |
| H 16.031441 15.760767 20.746998 | C 15.060424 15.849020 25.276031 |
| H 16.882582 13.427931 20.917587 | C 13.642818 16.101837 25.163391 |
| H 15.161795 11.395823 20.883476 | C 12.876571 12.274337 26.531969 |
| H 12.718710 11.827477 20.688496 | C 14.277399 12.027104 26.647003 |
| C 16.432671 13.930163 21.774986 | C 16.003725 14.089101 26.675976 |
| C 15.968547 15.201967 21.681538 | C 15.516604 15.426560 26.576166 |
| C 13.132401 15.702006 21.455212 | C 12.878576 15.888343 26.368830 |
| C 12.257881 14.664222 21.442696 | C 11.965373 14.794615 26.355217 |
| C 13.243329 11.964305 21.634890 | C 14.880818 12.312137 27.922541 |
| C 14.576344 11.728580 21.741474 | C 15.810950 13.423235 27.936493 |
| C 15.220253 15.727317 22.826733 | C 14.889074 15.973624 27.747452 |
| C 13.829069 15.975465 22.715242 | C 13.466795 16.218748 27.640625 |
| C 12.093050 13.911304 22.688818 | C 11.725044 14.134004 27.612511 |
| C 12.578681 12.582575 22.784151 | C 12.214142 12.775084 27.705162 |
| C 15.230076 12.115311 22.994287 | C 15.864034 14.198533 29.132710 |
| C 16.143488 13.198633 23.010628 | C 15.371402 15.575141 29.027517 |
| C 13.044177 15.813801 23.905655 | C 12.692858 16.030630 28.823624 |
| C 12.103108 14.691567 23.892097 | C 11.757667 14.909709 28.809008 |
| C 13.032932 12.148017 24.072838 | C 12.672626 12.347144 28.985390 |
| C 14.468217 11.890995 24.188929 | C 14.112864 12.103276 29.106644 |
| C 16.211235 13.966839 24.219368 | C 14.705402 16.080723 30.184624 |
| C 15.708858 15.337770 24.118048 | C 13.299657 16.301670 30.093948 |
| C 11.906209 14.028361 25.135927 | C 11.584614 14.245087 30.066917 |
| C 12.399297 12.674958 25.232174 | C 12.043230 12.897409 30.143713 |
|                                 | C 14.707387 12.432272 30.366739 |

|                                  |                                 |
|----------------------------------|---------------------------------|
| C 15.630556 13.535379 30.379761  | 06H60C13Ti                      |
| C 12.523818 16.139410 31.338457  | H 13.103241 16.369825 20.597702 |
| C 11.590138 15.018874 31.323851  | H 11.540508 14.422770 20.584312 |
| C 12.495982 12.475418 31.474974  | H 15.777282 15.950106 20.666733 |
| C 13.930654 12.249456 31.595428  | H 16.674902 13.623172 20.720215 |
| C 15.659856 14.312432 31.619280  | H 14.984761 11.500422 20.717209 |
| C 15.185385 15.686629 31.513821  | H 12.521093 11.888314 20.649004 |
| C 11.161894 14.287807 32.512711  | C 16.243593 14.087844 21.607916 |
| C 11.684336 12.903153 32.608719  | C 15.755806 15.352298 21.578817 |
| C 14.628644 12.434524 32.892799  | C 12.896721 15.797069 21.502764 |
| C 15.582245 13.574454 32.905842  | C 12.048983 14.740402 21.495613 |
| C 14.609167 16.391417 32.650455  | C 13.095591 12.035102 21.564436 |
| C 13.155772 16.668196 32.544052  | C 14.434357 11.823324 21.601877 |
| Sc 13.442104 14.400280 32.677238 | C 15.045103 15.820418 22.774366 |
| Sc 14.638109 13.375335 35.141525 | C 13.653412 16.034370 22.738585 |
| Sc 16.665077 11.700827 33.539005 | C 11.972207 13.940843 22.725023 |
| Sc 11.079681 13.683686 34.514133 | C 12.481538 12.628816 22.757467 |
| Sc 16.346962 15.445592 33.691818 | C 15.134884 12.214502 22.829836 |
| Sc 13.717546 16.829954 34.551491 | C 16.014973 13.314924 22.833281 |
| Sc 12.909978 11.347187 33.645573 | C 12.929432 15.822325 23.965368 |
| Sc 14.985458 13.054768 38.196014 | C 12.014207 14.685755 23.957916 |
| Sc 15.697312 15.732564 36.843864 | C 12.995977 12.163065 24.020041 |
| Sc 12.758079 14.929576 37.013969 | C 14.433999 11.940860 24.057835 |
| Sc 12.488434 11.899403 36.801521 | C 16.131378 14.051498 24.066629 |
| Sc 15.398320 10.703122 36.191303 | C 15.605299 15.408236 24.035692 |
| Sc 17.393286 13.084535 36.219864 | C 11.872150 13.985764 25.186405 |
|                                  | C 12.394566 12.634391 25.220793 |

C 15.076759 12.224472 25.292679  
C 15.987113 13.352983 25.297262  
C 15.010083 15.882454 25.238605  
C 13.577608 16.099112 25.199934  
C 12.943088 12.211315 26.480436  
C 14.351567 12.000745 26.513189  
C 16.040764 14.095115 26.525118  
C 15.534571 15.426262 26.497807  
C 12.879963 15.826368 26.428934  
C 11.983983 14.717078 26.421631  
C 14.998295 12.276677 27.771276  
C 15.899634 13.390951 27.776657  
C 14.949655 15.916858 27.725096  
C 13.527388 16.123047 27.683088  
C 11.824163 14.014647 27.670532  
C 12.328574 12.668353 27.707573  
C 16.018820 14.125825 28.999128  
C 15.506382 15.501994 28.976435  
C 12.810057 15.893265 28.897518  
C 11.890854 14.757080 28.890324  
C 12.842575 12.201069 28.958174  
C 14.294991 11.993055 28.986315  
C 14.887591 15.959955 30.179176  
C 13.470186 16.158207 30.132679  
C 11.766749 14.046483 30.119938  
C 12.257740 12.701678 30.160950  
C 14.944787 12.303533 30.207756

C 15.843536 13.414672 30.213737  
C 12.765150 15.899557 31.384340  
C 11.863934 14.782350 31.377678  
C 12.813320 12.300693 31.462473  
C 14.236305 12.075768 31.474344  
C 15.906902 14.145815 31.485594  
C 15.388975 15.490770 31.480947  
C 11.564816 14.075637 32.596779  
C 12.127589 12.726992 32.697701  
C 14.975975 12.178288 32.718613  
C 15.955979 13.392784 32.724995  
C 14.820892 16.062988 32.717037  
C 13.385805 16.333538 32.610802  
Ti 13.866018 14.079212 32.650364  
Ti 14.184542 13.807112 35.537903  
Ti 16.148628 12.225938 34.401237  
Ti 11.659496 13.766696 34.556263  
Ti 16.156553 15.076288 34.149475  
Ti 13.699071 16.290676 34.571728  
Ti 13.364323 11.620685 34.133377  
Ti 14.381707 13.634181 38.129005  
Ti 15.171724 15.855301 36.790810  
Ti 12.534007 15.134926 37.016247  
Ti 12.383326 12.403849 36.770748  
Ti 14.838391 11.468000 36.570343  
Ti 16.603127 13.652292 36.583408

06H60C13V

|                                 |                                 |
|---------------------------------|---------------------------------|
| H 13.219901 16.418728 20.614498 | C 15.045445 12.199545 25.313345 |
| H 11.617649 14.502551 20.567825 | C 15.975811 13.312197 25.334507 |
| H 15.884166 15.935595 20.714399 | C 15.051364 15.864694 25.276445 |
| H 16.730030 13.587102 20.767893 | C 13.623070 16.118149 25.222706 |
| H 14.984741 11.478777 20.736393 | C 12.900204 12.235935 26.472301 |
| H 12.528774 11.923811 20.642839 | C 14.301529 11.990437 26.525135 |
| C 16.293940 14.057635 21.649885 | C 16.030575 14.051331 26.565880 |
| C 15.834593 15.331690 21.621239 | C 15.546922 15.389959 26.539228 |
| C 12.990153 15.843550 21.512266 | C 12.903393 15.850489 26.439051 |
| C 12.121593 14.804184 21.486759 | C 11.989337 14.761250 26.411499 |
| C 13.100151 12.065365 21.561113 | C 14.944145 12.247396 27.793276 |
| C 14.432813 11.824036 21.611471 | C 15.864091 13.344425 27.813797 |
| C 15.118324 15.810344 22.811531 | C 14.951818 15.881253 27.764116 |
| C 13.734997 16.057232 22.758986 | C 13.538249 16.123085 27.711306 |
| C 12.012786 14.001080 22.711796 | C 11.801800 14.054814 27.658842 |
| C 12.489984 12.678702 22.747187 | C 12.288747 12.706325 27.694221 |
| C 15.128429 12.202209 22.848213 | C 15.984691 14.068924 29.043571 |
| C 16.026873 13.284112 22.868187 | C 15.486442 15.453115 29.021887 |
| C 12.988938 15.855734 23.977066 | C 12.794046 15.913116 28.915003 |
| C 12.054391 14.740693 23.950205 | C 11.846046 14.792290 28.882708 |
| C 12.977490 12.194615 24.015121 | C 12.778646 12.220713 28.949883 |
| C 14.409586 11.936512 24.069708 | C 14.226526 11.970529 29.003168 |
| C 16.144604 14.011979 24.108757 | C 14.856440 15.917837 30.212950 |
| C 15.650805 15.379889 24.079830 | C 13.443122 16.156631 30.159954 |
| C 11.878479 14.038470 25.173977 | C 11.695060 14.072399 30.098406 |
| C 12.372963 12.674366 25.208790 | C 12.183914 12.727772 30.138142 |
|                                 | C 14.873586 12.247247 30.235447 |



|                                 |                                 |
|---------------------------------|---------------------------------|
| C 15.798149 13.345251 30.246721 | 06H60C13Cr                      |
| C 12.719660 15.886163 31.404282 | H 12.914804 16.421320 20.631454 |
| C 11.808792 14.781473 31.368700 | H 11.404840 14.421516 20.626900 |
| C 12.721596 12.323493 31.440142 | H 15.678699 16.055622 20.636766 |
| C 14.126830 12.048135 31.487152 | H 16.642735 13.743649 20.642406 |
| C 15.819876 14.066650 31.517460 | H 14.964075 11.510342 20.647871 |
| C 15.311729 15.412739 31.512833 | H 12.477663 11.832592 20.637533 |
| C 11.515253 14.086004 32.595383 | C 16.186771 14.179397 21.532280 |
| C 12.058208 12.731937 32.699688 | C 15.666126 15.428606 21.529373 |
| C 14.771504 12.193505 32.797367 | C 12.769735 15.806837 21.520905 |
| C 15.772107 13.327150 32.778221 | C 11.954741 14.726755 21.518269 |
| C 14.746490 15.986925 32.760712 | C 13.080431 12.020659 21.527153 |
| C 13.309696 16.268299 32.669071 | C 14.422505 11.847077 21.532970 |
| V 13.761806 14.050556 32.588371 | C 14.946544 15.846595 22.743338 |
| V 14.322518 13.823901 35.258755 | C 13.565141 16.025423 22.739292 |
| V 16.027023 12.133152 34.499416 | C 11.955434 13.899169 22.734850 |
| V 11.891970 14.334023 34.522572 | C 12.490427 12.612915 22.738764 |
| V 15.925694 14.898941 34.007877 | C 15.133977 12.269346 22.750265 |
| V 13.425484 15.997578 34.614269 | C 15.973829 13.381473 22.750467 |
| V 13.238041 12.055419 34.279793 | C 12.872929 15.777151 23.994133 |
| V 14.721799 13.324459 37.835060 | C 12.004910 14.629272 23.991360 |
| V 15.582952 15.367313 36.692966 | C 13.041484 12.142421 23.998890 |
| V 12.784520 14.792009 36.931095 | C 14.469064 11.959121 24.005377 |
| V 12.464946 12.851426 36.542900 | C 16.099428 14.104155 24.005861 |
| V 15.024333 11.785792 36.659790 | C 15.543531 15.432038 24.002880 |
| V 16.696856 13.816891 36.276695 | C 11.881158 13.911606 25.216038 |
|                                 | C 12.443898 12.567729 25.219187 |

C 15.146694 12.221807 25.230558  
C 16.028730 13.380194 25.231428  
C 14.976179 15.893804 25.225933  
C 13.531530 16.079359 25.221647  
C 13.038695 12.151816 26.452579  
C 14.455147 11.971889 26.460060  
C 16.091236 14.110606 26.461527  
C 15.537600 15.427034 26.458166  
C 12.865121 15.767366 26.450211  
C 11.997037 14.633791 26.447609  
C 15.118512 12.265430 27.712910  
C 15.984258 13.390079 27.714907  
C 14.948251 15.859413 27.709200  
C 13.540662 16.033701 27.705793  
C 11.906258 13.909158 27.700115  
C 12.457405 12.602516 27.698477  
C 16.099173 14.110429 28.955954  
C 15.544204 15.444312 28.953428  
C 12.854794 15.778228 28.945713  
C 11.976136 14.632134 28.945030  
C 13.014836 12.135106 28.939806  
C 14.445292 11.962034 28.949383  
C 14.974717 15.920840 30.177212  
C 13.517966 16.084993 30.172630  
C 11.845972 13.907376 30.169479  
C 12.401013 12.549723 30.162115  
C 15.128836 12.215193 30.181067

C 16.019207 13.377083 30.183208  
C 12.844639 15.763721 31.398550  
C 11.975267 14.630606 31.406128  
C 13.006302 12.128972 31.385912  
C 14.421843 11.959850 31.398670  
C 16.071108 14.121199 31.401741  
C 15.541690 15.442948 31.403736  
C 11.866919 13.890559 32.672363  
C 12.429143 12.587092 32.664173  
C 15.063993 12.275917 32.679264  
C 15.885247 13.448611 32.694782  
C 14.949951 15.816370 32.700893  
C 13.541693 16.040485 32.649086  
Cr 13.882262 14.043946 33.345642  
Cr 14.028053 14.099155 35.423752  
Cr 15.748846 12.324478 34.596695  
Cr 11.632832 14.165973 34.693295  
Cr 16.050480 14.816827 34.295292  
Cr 13.573852 16.376457 34.564529  
Cr 13.226444 11.715891 34.332550  
Cr 13.702940 13.974611 38.087975  
Cr 15.016241 16.022879 36.850433  
Cr 12.432460 15.616940 36.674919  
Cr 12.311253 12.582922 36.614658  
Cr 14.746781 11.901358 36.592270  
Cr 16.019423 13.884031 36.981949

06H60C13Mn

H 13.144300 16.416353 20.617647  
H 11.456213 14.567045 20.647577  
H 15.875685 15.840169 20.637260  
H 16.633869 13.451900 20.684702  
H 14.755874 11.402200 20.710806  
H 12.304675 11.915504 20.693584  
C 16.209385 13.939410 21.563404  
C 15.801277 15.229240 21.537861  
C 12.940500 15.838117 21.519833  
C 12.027420 14.839258 21.536085  
C 12.916289 12.059655 21.585062  
C 14.241009 11.782356 21.594147  
C 15.115131 15.723479 22.743000  
C 13.751274 16.010166 22.734667  
C 11.950357 14.036966 22.766371  
C 12.370938 12.707752 22.789288  
C 14.983109 12.153983 22.807175  
C 15.923448 13.183458 22.792297  
C 13.041499 15.843788 23.992611  
C 12.071859 14.779696 24.009472  
C 12.883986 12.212379 24.054497  
C 14.293123 11.918151 24.062527  
C 16.114058 13.910715 24.034616  
C 15.676933 15.283556 24.009151  
C 11.890402 14.095533 25.246321  
C 12.328953 12.707633 25.270002

C 14.991597 12.141927 25.283117  
C 15.976099 13.214298 25.268835  
C 15.148720 15.809751 25.222292  
C 13.724257 16.112514 25.213823  
C 12.888920 12.261007 26.508423  
C 14.285621 11.964972 26.514675  
C 16.102440 13.955883 26.486378  
C 15.667807 15.316068 26.462708  
C 13.035741 15.882330 26.448048  
C 12.073404 14.827049 26.464390  
C 14.977956 12.217046 27.759388  
C 15.932979 13.265611 27.746252  
C 15.121175 15.821165 27.704042  
C 13.731437 16.119295 27.697353  
C 11.927756 14.135306 27.727524  
C 12.358556 12.785396 27.748274  
C 16.114380 13.994609 28.975756  
C 15.677662 15.368465 28.950146  
C 13.029387 15.943783 28.940626  
C 12.060020 14.874739 28.959324  
C 12.881588 12.296381 28.997715  
C 14.290001 11.993176 29.003782  
C 15.154500 15.908230 30.169228  
C 13.722992 16.216446 30.165470  
C 11.862925 14.181006 30.195900  
C 12.306437 12.782335 30.214403  
C 15.006309 12.201859 30.226173

|                                  |                                 |
|----------------------------------|---------------------------------|
| C 15.996205 13.286356 30.214863  | 06H60C13Fe                      |
| C 13.036182 15.965839 31.388559  | H 13.103623 16.501820 20.650394 |
| C 12.062222 14.920964 31.407518  | H 11.422981 14.641965 20.645304 |
| C 12.879004 12.322302 31.440357  | H 15.852228 15.916602 20.648363 |
| C 14.284183 12.025288 31.446093  | H 16.619101 13.529065 20.645548 |
| C 16.119425 14.046396 31.423033  | H 14.738169 11.445033 20.643057 |
| C 15.675285 15.400488 31.394112  | H 12.285697 11.967244 20.641821 |
| C 11.973571 14.253027 32.705154  | C 16.192152 13.997620 21.533346 |
| C 12.398632 12.863452 32.719971  | C 15.778765 15.285550 21.535089 |
| C 14.934577 12.328173 32.730343  | C 12.912074 15.895138 21.536556 |
| C 15.901767 13.402889 32.724201  | C 12.004921 14.891546 21.533604 |
| C 15.110187 15.826164 32.689995  | C 12.904537 12.103516 21.529778 |
| C 13.729731 16.096556 32.683456  | C 14.228039 11.822345 21.530399 |
| Mn 13.967268 14.039359 33.324638 | C 15.092451 15.752347 22.751154 |
| Mn 13.993628 14.004480 35.482388 | C 13.731007 16.039116 22.751307 |
| Mn 15.969017 12.455359 34.523739 | C 11.942057 14.061556 22.747026 |
| Mn 11.444115 13.373749 34.481632 | C 12.368419 12.737535 22.745440 |
| Mn 16.093666 15.075302 34.250984 | C 14.975655 12.183722 22.746599 |
| Mn 12.520498 15.827023 34.246750 | C 15.908954 13.215594 22.748646 |
| Mn 13.493470 11.738089 34.221981 | C 13.025297 15.845263 24.009684 |
| Mn 13.997645 14.024858 38.053326 | C 12.061373 14.781496 24.006973 |
| Mn 14.398023 15.940273 36.387646 | C 12.885599 12.220536 24.004057 |
| Mn 12.015398 14.883217 36.610786 | C 14.291121 11.925038 24.005095 |
| Mn 12.449923 12.472143 36.558197 | C 16.098036 13.921450 24.009022 |
| Mn 14.652521 11.975624 36.584362 | C 15.657609 15.288346 24.010092 |
| Mn 16.151630 14.013508 36.611908 | C 11.878389 14.073492 25.231045 |
|                                  | C 12.324256 12.686615 25.228703 |

C 14.991284 12.124998 25.230957  
C 15.970210 13.203591 25.234951  
C 15.134561 15.797375 25.235964  
C 13.708469 16.095770 25.235611  
C 12.884761 12.214964 26.457619  
C 14.284770 11.923361 26.458454  
C 16.095407 13.924359 26.465481  
C 15.658965 15.286426 26.464937  
C 13.020419 15.839812 26.463348  
C 12.060953 14.780220 26.461952  
C 14.971689 12.162541 27.710417  
C 15.918959 13.215556 27.716846  
C 15.103416 15.762304 27.715687  
C 13.718534 16.047752 27.714062  
C 11.921428 14.061469 27.712318  
C 12.350463 12.711616 27.707626  
C 16.093185 13.922462 28.963570  
C 15.659292 15.295751 28.962889  
C 13.015602 15.845125 28.957708  
C 12.051460 14.776913 28.958622  
C 12.873207 12.199175 28.950272  
C 14.282977 11.906521 28.951069  
C 15.139384 15.821415 30.187548  
C 13.697390 16.117924 30.183449  
C 11.862817 14.064377 30.187542  
C 12.299383 12.663100 30.178743  
C 14.994852 12.094371 30.180624

C 15.966318 13.196672 30.191441  
C 12.991656 15.862955 31.402760  
C 12.050592 14.784587 31.409559  
C 12.869356 12.156887 31.384140  
C 14.267595 11.860161 31.384150  
C 16.086540 13.931205 31.414488  
C 15.673123 15.302679 31.412107  
C 11.998763 14.040148 32.670578  
C 12.465413 12.715668 32.677395  
C 14.868289 12.204346 32.676552  
C 15.825498 13.227282 32.668190  
C 15.092258 15.770312 32.673824  
C 13.709957 16.060104 32.665432  
Fe 14.013144 14.110475 33.266396  
Fe 13.975306 13.999531 35.572872  
Fe 15.845177 13.060961 34.606201  
Fe 11.892697 13.887225 34.608265  
Fe 15.488240 15.565506 34.606030  
Fe 13.117857 15.998380 34.539272  
Fe 13.559832 11.948492 34.212708  
Fe 14.166319 13.932563 37.946526  
Fe 14.311445 16.163733 36.643623  
Fe 12.246639 14.906893 36.863388  
Fe 12.537682 12.405815 36.542068  
Fe 14.813596 12.014476 36.584518  
Fe 16.118357 14.303648 36.661026

06H60C13Co

|                                 |                                 |
|---------------------------------|---------------------------------|
| H 13.118507 16.495871 20.666656 | C 14.987490 12.136716 25.240572 |
| H 11.438389 14.641621 20.659939 | C 15.964869 13.213278 25.243877 |
| H 15.822788 15.926318 20.662548 | C 15.131112 15.804949 25.250343 |
| H 16.588903 13.542701 20.654217 | C 13.707033 16.100128 25.251799 |
| H 14.737381 11.494266 20.648010 | C 12.885663 12.222326 26.473091 |
| H 12.287798 12.010994 20.650810 | C 14.283355 11.933752 26.471998 |
| C 16.180635 14.011933 21.550220 | C 16.090405 13.931272 26.477390 |
| C 15.766084 15.300636 21.554188 | C 15.656236 15.291193 26.479513 |
| C 12.914085 15.902988 21.559065 | C 13.021585 15.841165 26.482183 |
| C 12.004658 14.900422 21.555538 | C 12.063842 14.783547 26.480915 |
| C 12.901240 12.128558 21.545000 | C 14.972901 12.161476 27.722355 |
| C 14.225782 11.849366 21.543573 | C 15.928150 13.218893 27.726200 |
| C 15.092250 15.770872 22.773697 | C 15.110238 15.773603 27.728664 |
| C 13.724246 16.055546 22.775864 | C 13.717493 16.060347 27.729918 |
| C 11.929252 14.074844 22.770035 | C 11.913583 14.066905 27.728354 |
| C 12.359317 12.745729 22.765238 | C 12.343958 12.707808 27.723415 |
| C 14.973292 12.193239 22.762693 | C 16.096226 13.925033 28.965055 |
| C 15.910919 13.229226 22.765680 | C 15.664321 15.301922 28.966475 |
| C 13.019949 15.858727 24.028521 | C 13.017411 15.851441 28.966801 |
| C 12.050128 14.790560 24.026304 | C 12.051517 14.780466 28.966116 |
| C 12.877842 12.226091 24.016697 | C 12.871180 12.198421 28.957830 |
| C 14.290758 11.930879 24.015629 | C 14.284330 11.905473 28.956278 |
| C 16.099957 13.931618 24.021311 | C 15.139452 15.821548 30.192059 |
| C 15.659105 15.305820 24.025139 | C 13.705200 16.116199 30.193153 |
| C 11.879080 14.078755 25.247574 | C 11.879609 14.066374 30.197374 |
| C 12.323820 12.693741 25.242136 | C 12.310161 12.668385 30.191755 |
|                                 | C 14.988493 12.102456 30.189413 |

|                                  |                                 |
|----------------------------------|---------------------------------|
| C 15.954273 13.202184 30.194298  | 06H60C13Ni                      |
| C 13.006470 15.867990 31.422764  | H 13.120184 16.471661 20.672670 |
| C 12.063147 14.786449 31.420351  | H 11.434884 14.622295 20.669798 |
| C 12.868382 12.151360 31.400930  | H 15.822020 15.897697 20.668312 |
| C 14.267956 11.853588 31.398582  | H 16.583706 13.512508 20.660572 |
| C 16.083591 13.933708 31.416689  | H 14.727442 11.469243 20.654419 |
| C 15.675422 15.308836 31.420576  | H 12.279114 11.988550 20.657282 |
| C 11.975680 14.022635 32.662621  | C 16.177624 13.983733 21.556505 |
| C 12.437657 12.694372 32.692478  | C 15.765892 15.273295 21.560652 |
| C 14.886205 12.173858 32.688141  | C 12.915092 15.880947 21.566238 |
| C 15.850456 13.199092 32.656151  | C 12.002971 14.880337 21.564489 |
| C 15.110823 15.810254 32.679729  | C 12.892600 12.106198 21.551426 |
| C 13.727370 16.102753 32.680668  | C 14.217019 11.825235 21.550220 |
| Co 14.029703 14.139972 33.120331 | C 15.093724 15.744981 22.780367 |
| Co 14.008396 13.975777 35.555283 | C 13.726619 16.032961 22.782675 |
| Co 15.884912 12.980175 34.528214 | C 11.926905 14.055642 22.778561 |
| Co 11.880359 13.855600 34.539818 | C 12.351759 12.724300 22.771675 |
| Co 15.573265 15.402947 34.532646 | C 14.965226 12.168265 22.768587 |
| Co 13.169697 15.929008 34.543888 | C 15.905085 13.201904 22.771872 |
| Co 13.590864 12.089733 34.264885 | C 13.022454 15.837801 24.035831 |
| Co 13.992454 13.854953 37.841656 | C 12.050188 14.773739 24.033875 |
| Co 14.452134 15.982058 36.628231 | C 12.871464 12.206732 24.022688 |
| Co 12.207162 14.945545 36.632477 | C 14.281508 11.907369 24.020639 |
| Co 12.462421 12.535489 36.515030 | C 16.095751 13.904608 24.027710 |
| Co 14.818636 12.020632 36.507484 | C 15.658972 15.278461 24.032185 |
| Co 16.060587 14.104635 36.616909 | C 11.873586 14.063104 25.256401 |
|                                  | C 12.318755 12.678964 25.248526 |

C 14.981749 12.110250 25.244665  
C 15.961277 13.184797 25.250597  
C 15.131652 15.776080 25.259035  
C 13.709951 16.075912 25.260504  
C 12.878958 12.202773 26.475986  
C 14.276942 11.905996 26.473547  
C 16.090593 13.899514 26.485685  
C 15.656968 15.261034 26.487101  
C 13.021304 15.823117 26.489666  
C 12.056960 14.767209 26.490643  
C 14.967570 12.131697 27.722029  
C 15.924429 13.184594 27.732578  
C 15.109365 15.739749 27.734800  
C 13.719453 16.032858 27.735899  
C 11.910183 14.047346 27.736567  
C 12.341851 12.690841 27.725353  
C 16.092339 13.888357 28.976990  
C 15.664175 15.265888 28.973866  
C 13.018518 15.827737 28.974895  
C 12.053511 14.756419 28.980797  
C 12.866566 12.168945 28.956207  
C 14.278296 11.868599 28.954159  
C 15.141623 15.790211 30.195866  
C 13.709227 16.092104 30.197048  
C 11.894171 14.034917 30.210556  
C 12.307005 12.633143 30.189199  
C 14.983870 12.059366 30.185400

C 15.938046 13.165715 30.205423  
C 13.011130 15.852616 31.429930  
C 12.090456 14.743627 31.442310  
C 12.861457 12.090083 31.389145  
C 14.259058 11.790993 31.387589  
C 16.054903 13.891644 31.438103  
C 15.679210 15.284641 31.429031  
C 12.047327 13.964799 32.679520  
C 12.462957 12.620570 32.686104  
C 14.848437 12.104821 32.681877  
C 15.777848 13.160944 32.673126  
C 15.121885 15.834569 32.662640  
C 13.745841 16.128796 32.664169  
Ni 14.046757 14.188892 33.197651  
Ni 14.035673 14.090182 35.518295  
Ni 15.975383 13.109736 34.517673  
Ni 11.856987 14.006658 34.526897  
Ni 15.622934 15.554705 34.481747  
Ni 13.174018 16.078798 34.481491  
Ni 13.603085 12.093658 34.159935  
Ni 13.983169 14.042114 37.822189  
Ni 14.418028 16.085564 36.620941  
Ni 12.191664 15.174307 36.573349  
Ni 12.465742 12.716653 36.490578  
Ni 14.827307 12.194046 36.489975  
Ni 16.071650 14.320883 36.586487



06H60C13Cu

H 13.147289 16.427528 20.642010  
H 11.473087 14.577245 20.647694  
H 15.810081 15.890105 20.652941  
H 16.573629 13.512236 20.654892  
H 14.751492 11.489779 20.658171  
H 12.307071 11.998047 20.654617  
C 16.180525 13.986461 21.555101  
C 15.766137 15.276628 21.553795  
C 12.926398 15.862393 21.548414  
C 12.016949 14.857055 21.550716  
C 12.910655 12.103498 21.557055  
C 14.237378 11.826652 21.559240  
C 15.098087 15.758085 22.769831  
C 13.722925 16.043743 22.767164  
C 11.927321 14.047779 22.771755  
C 12.356527 12.709253 22.774475  
C 14.983007 12.167023 22.776865  
C 15.925510 13.208672 22.773970  
C 13.018961 15.845342 24.014175  
C 12.045235 14.773424 24.015976  
C 12.881291 12.204857 24.021301  
C 14.299889 11.906517 24.023323  
C 16.104301 13.919563 24.019627  
C 15.663867 15.299810 24.017918  
C 11.885689 14.067163 25.242731  
C 12.331934 12.687055 25.244600

C 14.991246 12.131029 25.246792  
C 15.964216 13.206714 25.245722  
C 15.124971 15.790621 25.240927  
C 13.704809 16.086336 25.240738  
C 12.889199 12.218318 26.479086  
C 14.288744 11.930102 26.482687  
C 16.094439 13.926128 26.478979  
C 15.652455 15.284412 26.475477  
C 13.018822 15.837495 26.475777  
C 12.062057 14.777826 26.477079  
C 14.981953 12.156007 27.726782  
C 15.950017 13.212384 27.728077  
C 15.109509 15.770985 27.720428  
C 13.711673 16.063326 27.724926  
C 11.905202 14.064698 27.724159  
C 12.341008 12.702851 27.722540  
C 16.109804 13.924595 28.957954  
C 15.672267 15.303559 28.952780  
C 13.014802 15.844656 28.957785  
C 12.033269 14.784019 28.958521  
C 12.880202 12.208842 28.952934  
C 14.291600 11.907549 28.958458  
C 15.138256 15.807238 30.176754  
C 13.710131 16.080292 30.188425  
C 11.874294 14.073572 30.189201  
C 12.323853 12.688316 30.182541  
C 14.985639 12.121051 30.194002

|                                  |                                 |
|----------------------------------|---------------------------------|
| C 15.956647 13.208222 30.196047  | 06H60C13Zn                      |
| C 13.022088 15.851618 31.434486  | H 12.931813 16.594952 20.652596 |
| C 12.061811 14.778060 31.432747  | H 11.301010 14.690685 20.633091 |
| C 12.867328 12.173991 31.404779  | H 15.669805 16.058029 20.588980 |
| C 14.266428 11.885338 31.413603  | H 16.504711 13.696756 20.526203 |
| C 16.106636 13.938313 31.420219  | H 14.693062 11.572285 20.513521 |
| C 15.673526 15.305499 31.411806  | H 12.232523 12.043162 20.557119 |
| C 11.874795 13.987868 32.647404  | C 16.089334 14.136961 21.433527 |
| C 12.297607 12.647549 32.660851  | C 15.637849 15.412235 21.467293 |
| C 14.950977 12.187158 32.662312  | C 12.766654 15.967756 21.529366 |
| C 15.902665 13.196838 32.654533  | C 11.886948 14.939842 21.518690 |
| C 15.129598 15.839014 32.641911  | C 12.859847 12.172293 21.440117 |
| C 13.757200 16.202129 32.661400  | C 14.188755 11.918280 21.416569 |
| Cu 13.914386 14.151978 33.211761 | C 14.966517 15.840622 22.704889 |
| Cu 13.980494 14.051702 35.613773 | C 13.597538 16.106316 22.735706 |
| Cu 15.755572 12.589710 34.518826 | C 11.861813 14.082274 22.715054 |
| Cu 11.728324 14.273101 34.567574 | C 12.325186 12.767578 22.675909 |
| Cu 15.885674 15.099896 34.325848 | C 14.947159 12.266603 22.628508 |
| Cu 13.265971 16.243540 34.549099 | C 15.855404 13.324207 22.637285 |
| Cu 13.312397 12.014516 34.258980 | C 12.917310 15.870440 23.997004 |
| Cu 14.063538 13.950994 38.012642 | C 11.976348 14.777726 23.987087 |
| Cu 14.790090 16.016569 36.571522 | C 12.871330 12.235995 23.911491 |
| Cu 12.387191 15.344028 36.748680 | C 14.287699 11.968250 23.885967 |
| Cu 12.209010 12.849689 36.576595 | C 16.049377 14.007726 23.903585 |
| Cu 14.523741 11.943057 36.526760 | C 15.565512 15.365241 23.939648 |
| Cu 16.146629 13.920784 36.547951 | C 11.837911 14.039384 25.196850 |
|                                  | C 12.324909 12.667006 25.151958 |

C 15.003942 12.161000 25.100403  
C 15.960074 13.260895 25.113144  
C 15.049726 15.828332 25.183769  
C 13.617825 16.099136 25.214918  
C 12.922889 12.187177 26.361607  
C 14.323936 11.925471 26.335896  
C 16.084652 13.958297 26.360308  
C 15.606511 15.300827 26.393713  
C 12.960546 15.797230 26.450779  
C 12.026461 14.720677 26.444817  
C 15.033614 12.141605 27.581545  
C 15.963978 13.215927 27.603317  
C 15.069475 15.743797 27.666033  
C 13.673393 16.002584 27.695673  
C 11.919621 13.970833 27.685169  
C 12.393474 12.632584 27.634005  
C 16.143829 13.900661 28.859940  
C 15.668100 15.271338 28.883392  
C 12.990411 15.766836 28.937847  
C 12.049391 14.661338 28.940662  
C 12.947241 12.092579 28.842575  
C 14.376872 11.828097 28.816118  
C 15.128949 15.723286 30.120302  
C 13.700365 15.986130 30.149839  
C 11.954048 13.910995 30.154022  
C 12.409540 12.533801 30.087448  
C 15.088521 12.038637 30.035967

C 16.008852 13.161653 30.078001  
C 13.043229 15.686290 31.403011  
C 12.163044 14.581923 31.420467  
C 13.007432 12.028492 31.290344  
C 14.398264 11.774179 31.265923  
C 16.103128 13.856018 31.351669  
C 15.680811 15.204121 31.351490  
C 12.043858 13.769401 32.651356  
C 12.504251 12.461117 32.576397  
C 15.063981 11.999480 32.532112  
C 15.964200 13.049685 32.585812  
C 15.160893 15.839822 32.564636  
C 13.795766 16.077932 32.596737  
Zn 14.061229 14.177814 33.881256  
Zn 15.484161 14.771096 36.392532  
Zn 16.477049 13.262452 34.524475  
Zn 11.499467 14.135865 34.566578  
Zn 16.033792 16.025841 34.390167  
Zn 13.061427 16.565025 34.454876  
Zn 13.702589 11.672638 34.105480  
Zn 12.714136 13.705723 38.697926  
Zn 14.331232 15.668711 38.525185  
Zn 12.757592 15.249567 36.489517  
Zn 12.552350 12.612947 36.306797  
Zn 15.014965 12.198133 36.312157  
Zn 15.158595 13.281402 38.683876

06H60C13Y

|                                 |                                 |
|---------------------------------|---------------------------------|
| H 13.293447 16.174881 20.509583 | C 15.096258 12.238718 25.433205 |
| H 11.755413 14.220793 20.499439 | C 15.990904 13.370750 25.436966 |
| H 15.913724 15.767423 20.697548 | C 14.983683 15.871334 25.237209 |
| H 16.841928 13.471033 20.882303 | C 13.559946 16.077248 25.132286 |
| H 15.213111 11.391365 20.880432 | C 12.923451 12.250323 26.526741 |
| H 12.762678 11.755000 20.684551 | C 14.330952 12.047001 26.640120 |
| C 16.394129 13.968194 21.743860 | C 15.994170 14.156716 26.646921 |
| C 15.886404 15.223956 21.642801 | C 15.460753 15.475471 26.538195 |
| C 13.040012 15.651566 21.432533 | C 12.805798 15.854418 26.342606 |
| C 12.199432 14.584709 21.426926 | C 11.920977 14.736651 26.337654 |
| C 13.281830 11.910650 21.631266 | C 14.939425 12.348639 27.908836 |
| C 14.620860 11.712074 21.738533 | C 15.839079 13.493443 27.913694 |
| C 15.137009 15.741119 22.789274 | C 14.820018 16.009373 27.709080 |
| C 13.735522 15.950006 22.685822 | C 13.387122 16.216484 27.607718 |
| C 12.066137 13.829210 22.675035 | C 11.702371 14.080857 27.599072 |
| C 12.598461 12.516295 22.775597 | C 12.247841 12.737704 27.695889 |
| C 15.265759 12.124726 22.986547 | C 15.861367 14.276593 29.101854 |
| C 16.146391 13.238793 22.989292 | C 15.316465 15.627607 28.984570 |
| C 12.963851 15.764729 23.879345 | C 12.623363 16.012144 28.792559 |
| C 12.055304 14.614297 23.873804 | C 11.720967 14.866919 28.787373 |
| C 13.065924 12.103631 24.066540 | C 12.736468 12.341314 28.969418 |
| C 14.512134 11.891893 24.181982 | C 14.178816 12.135414 29.091627 |
| C 16.193846 14.021948 24.187622 | C 14.629959 16.103016 30.146296 |
| C 15.645029 15.376838 24.078030 | C 13.228434 16.283546 30.064617 |
| C 11.886250 13.955853 25.123688 | C 11.596140 14.206441 30.054295 |
| C 12.425684 12.622622 25.225798 | C 12.105675 12.887985 30.129280 |
|                                 | C 14.758618 12.494931 30.356916 |

|                                 |                                 |
|---------------------------------|---------------------------------|
| C 15.645149 13.620588 30.362761 | 06H60C13Zr                      |
| C 12.466602 16.134106 31.325888 | H 13.251274 16.285093 20.526283 |
| C 11.554440 14.973976 31.319853 | H 11.664598 14.364072 20.513048 |
| C 12.557154 12.470659 31.454796 | H 15.909930 15.860599 20.666649 |
| C 13.995537 12.290325 31.587830 | H 16.787687 13.529285 20.768871 |
| C 15.655015 14.402451 31.599747 | H 15.064036 11.454998 20.744709 |
| C 15.135853 15.754933 31.473484 | H 12.607436 11.852972 20.628597 |
| C 11.073482 14.175707 32.451050 | C 16.343681 14.007923 21.642618 |
| C 11.639203 12.791895 32.539009 | C 15.865794 15.276304 21.586868 |
| C 14.711949 12.470976 32.881310 | C 13.012671 15.739775 21.440338 |
| C 15.639977 13.652950 32.888836 | C 12.148694 14.694088 21.432987 |
| C 14.597024 16.556480 32.563675 | C 13.162307 11.995515 21.556820 |
| C 13.120314 16.779926 32.467003 | C 14.499495 11.779044 21.619905 |
| Y 13.340022 14.495498 33.045094 | C 15.134848 15.767214 22.758577 |
| Y 14.894718 13.249960 35.361603 | C 13.742668 15.997692 22.685862 |
| Y 16.948164 11.683656 33.392509 | C 12.028950 13.918710 22.671461 |
| Y 10.530948 13.297576 34.471577 | C 12.525971 12.597080 22.732220 |
| Y 16.586258 15.634010 33.659698 | C 15.181972 12.161620 22.859386 |
| Y 13.824420 17.476120 34.510315 | C 16.082123 13.249881 22.870876 |
| Y 12.999031 11.064512 33.613789 | C 12.991008 15.810324 23.897629 |
| Y 15.044795 13.078861 38.598412 | C 12.064028 14.681395 23.888952 |
| Y 15.860346 16.020443 37.041241 | C 13.018385 12.145391 24.004658 |
| Y 12.609735 15.010853 36.914337 | C 14.456184 11.905840 24.074518 |
| Y 12.414200 11.611646 36.984337 | C 16.178394 13.998539 24.095110 |
| Y 15.683199 10.409274 36.479218 | C 15.662378 15.363205 24.034393 |
| Y 17.813177 13.107970 36.539494 | C 11.898794 13.997148 25.125223 |
|                                 | C 12.407137 12.644701 25.187845 |

|                                 |                                  |
|---------------------------------|----------------------------------|
| C 15.077025 12.200462 25.321257 | C 15.749382 13.477577 30.261860  |
| C 15.994748 13.319401 25.331758 | C 12.649302 16.023949 31.323706  |
| C 15.042637 15.854656 25.215849 | C 11.717677 14.886340 31.313919  |
| C 13.616748 16.091368 25.143223 | C 12.658670 12.331622 31.436628  |
| C 12.924686 12.228971 26.466728 | C 14.100063 12.114671 31.494970  |
| C 14.330002 11.998346 26.536947 | C 15.839765 14.243270 31.511652  |
| C 16.032356 14.079523 26.554834 | C 15.339661 15.613884 31.463711  |
| C 15.535122 15.413481 26.494663 | C 11.334408 14.132646 32.500057  |
| C 12.888081 15.846663 26.361143 | C 11.878059 12.751331 32.620354  |
| C 11.984629 14.744243 26.352060 | C 14.835135 12.280683 32.758713  |
| C 14.958286 12.278822 27.805456 | C 15.814821 13.478651 32.768299  |
| C 15.871418 13.396222 27.814346 | C 14.763558 16.283657 32.648655  |
| C 14.933063 15.935533 27.695711 | C 13.301191 16.539898 32.519211  |
| C 13.509211 16.158009 27.623026 | Zr 13.656295 14.243315 32.599129 |
| C 11.788196 14.057542 27.603767 | Zr 14.248267 13.734850 35.602875 |
| C 12.286050 12.704903 27.667164 | Zr 16.458857 11.942776 34.280312 |
| C 15.957353 14.154656 29.022238 | Zr 11.400856 13.786985 34.624752 |
| C 15.457880 15.532080 28.960451 | Zr 16.352135 15.245161 34.115463 |
| C 12.765902 15.942406 28.821392 | Zr 13.636258 16.523987 34.646599 |
| C 11.839693 14.812052 28.811831 | Zr 13.201592 11.386650 34.080917 |
| C 12.775442 12.256512 28.933006 | Zr 14.587298 13.432863 38.458187 |
| C 14.223054 12.038504 29.006418 | Zr 15.371372 15.973274 37.048794 |
| C 14.814367 16.013609 30.144468 | Zr 12.503404 15.144161 37.388962 |
| C 13.401563 16.207216 30.073084 | Zr 12.269547 12.169081 37.015366 |
| C 11.695603 14.123844 30.056004 | Zr 14.993372 11.132627 36.646511 |
| C 12.167584 12.776384 30.117910 | Zr 16.937830 13.516705 36.668007 |
| C 14.840081 12.365574 30.253254 |                                  |

06H60C13Nb

|                                 |                                 |
|---------------------------------|---------------------------------|
| H 13.223021 16.356928 20.552021 | C 15.058372 12.195301 25.284374 |
| H 11.620377 14.446676 20.535563 | C 15.985099 13.307569 25.291653 |
| H 15.881011 15.889883 20.652187 | C 15.063639 15.858530 25.214476 |
| H 16.721058 13.542893 20.724297 | C 13.637377 16.109720 25.163157 |
| H 14.985345 11.463889 20.713800 | C 12.923327 12.235477 26.455656 |
| H 12.531492 11.897701 20.621735 | C 14.326184 11.988006 26.505001 |
| C 16.294230 14.022062 21.606335 | C 16.046322 14.055157 26.519163 |
| C 15.837158 15.298195 21.567568 | C 15.563191 15.394322 26.480635 |
| C 12.991071 15.801262 21.461426 | C 12.920583 15.859640 26.387781 |
| C 12.119999 14.762276 21.452526 | C 12.010245 14.765465 26.376162 |
| C 13.099516 12.035261 21.542675 | C 14.984348 12.242086 27.760904 |
| C 14.433858 11.800793 21.592598 | C 15.901126 13.352907 27.767578 |
| C 15.125500 15.788808 22.753019 | C 14.973790 15.897039 27.697802 |
| C 13.737645 16.031910 22.701420 | C 13.558818 16.153042 27.653172 |
| C 12.008780 13.971721 22.683565 | C 11.831779 14.070786 27.630760 |
| C 12.486833 12.645865 22.727360 | C 12.323153 12.717918 27.672670 |
| C 15.133175 12.176028 22.826160 | C 16.010876 14.087926 28.986534 |
| C 16.036316 13.258962 22.832182 | C 15.509381 15.465986 28.948751 |
| C 12.998104 15.836842 23.921902 | C 12.824319 15.954246 28.865238 |
| C 12.062124 14.719704 23.912504 | C 11.892484 14.818318 28.845304 |
| C 12.981488 12.172314 23.993988 | C 12.835079 12.247540 28.923685 |
| C 14.418075 11.918240 24.046490 | C 14.275371 11.985384 28.974173 |
| C 16.156288 13.997353 24.061386 | C 14.889299 15.939374 30.139580 |
| C 15.662789 15.369324 24.020607 | C 13.484571 16.194950 30.109619 |
| C 11.899164 14.028340 25.145672 | C 11.773177 14.108199 30.071295 |
| C 12.391400 12.666797 25.189201 | C 12.260010 12.768384 30.115965 |
|                                 | C 14.934096 12.266896 30.209999 |

|                                  |                                 |
|----------------------------------|---------------------------------|
| C 15.842319 13.379105 30.211344  | 06H60C13Mo                      |
| C 12.774909 15.957189 31.385431  | H 13.053955 16.418907 20.574919 |
| C 11.856798 14.840137 31.341925  | H 11.482109 14.471131 20.557096 |
| C 12.788234 12.336446 31.418327  | H 15.767893 15.977668 20.612808 |
| C 14.214504 12.047825 31.470600  | H 16.683281 13.649643 20.638653 |
| C 15.917551 14.123092 31.467756  | H 14.972275 11.511082 20.624035 |
| C 15.393944 15.477383 31.430937  | H 12.502213 11.905048 20.575247 |
| C 11.455535 14.100513 32.521229  | C 16.241280 14.102790 21.526863 |
| C 12.010074 12.710842 32.620487  | C 15.746659 15.362501 21.513380 |
| C 14.904755 12.217272 32.763512  | C 12.871886 15.819693 21.467884 |
| C 15.883265 13.413404 32.754772  | C 12.021492 14.765843 21.458185 |
| C 14.879593 16.113180 32.662598  | C 13.089033 12.052291 21.482922 |
| C 13.411145 16.380009 32.643009  | C 14.426010 11.840458 21.508644 |
| Nb 13.790733 14.154668 32.615211 | C 15.035158 15.807570 22.719984 |
| Nb 14.169653 13.719101 35.483871 | C 13.652422 16.026352 22.696281 |
| Nb 16.245750 12.209283 34.607105 | C 11.977018 13.942984 22.676294 |
| Nb 11.440222 13.851960 34.580948 | C 12.489711 12.640922 22.688744 |
| Nb 15.992859 15.120666 34.220409 | C 15.133080 12.226800 22.738766 |
| Nb 12.979287 16.066109 34.753712 | C 16.011152 13.316849 22.747482 |
| Nb 13.219977 11.713769 34.195873 | C 12.939992 15.799029 23.936026 |
| Nb 14.451816 13.766972 38.314110 | C 12.031328 14.673429 23.925535 |
| Nb 15.093090 15.815077 36.822342 | C 13.014156 12.158318 23.950338 |
| Nb 12.182650 14.772679 37.159882 | C 14.445791 11.932693 23.977058 |
| Nb 12.427586 12.278340 36.856632 | C 16.138201 14.038465 23.995857 |
| Nb 15.221515 11.703038 37.131035 | C 15.611444 15.388787 23.981396 |
| Nb 16.820396 13.791754 36.677681 | C 11.889044 13.959682 25.149731 |
|                                  | C 12.419509 12.606194 25.161814 |



C 15.108385 12.190331 25.209063  
C 16.019760 13.322328 25.219500  
C 15.031666 15.855944 25.193388  
C 13.595228 16.078081 25.169260  
C 12.987623 12.175184 26.411066  
C 14.396135 11.960287 26.435070  
C 16.080482 14.053709 26.454233  
C 15.562881 15.380098 26.440784  
C 12.907055 15.787912 26.393467  
C 12.014018 14.679216 26.384041  
C 15.056116 12.223488 27.695621  
C 15.955528 13.339746 27.706419  
C 14.977576 15.846004 27.680124  
C 13.568325 16.060482 27.654701  
C 11.882961 13.960637 27.637426  
C 12.393882 12.628524 27.650703  
C 16.060692 14.065722 28.932762  
C 15.552171 15.422264 28.926033  
C 12.868841 15.819353 28.880852  
C 11.958711 14.684568 28.870928  
C 12.927942 12.150681 28.896070  
C 14.360895 11.944952 28.912811  
C 14.970419 15.891641 30.148193  
C 13.537179 16.087009 30.109402  
C 11.839853 13.964361 30.094851  
C 12.336864 12.604532 30.121117  
C 15.013357 12.221703 30.158209

C 15.914371 13.356643 30.166962  
C 12.839518 15.816672 31.351181  
C 11.944635 14.695541 31.341099  
C 12.889655 12.161219 31.384716  
C 14.306134 11.948480 31.386137  
C 16.014036 14.094847 31.401619  
C 15.512889 15.437889 31.414433  
C 11.636363 13.940068 32.556057  
C 12.233982 12.601583 32.643223  
C 15.085946 12.179042 32.593472  
C 15.958478 13.268775 32.591827  
C 14.944422 15.988597 32.673084  
C 13.498995 16.275820 32.571587  
Mo 13.727934 14.202655 33.272297  
Mo 13.764164 14.169139 36.201099  
Mo 15.447110 12.843201 34.614838  
Mo 11.526390 13.965831 34.610771  
Mo 15.709822 15.468889 34.764053  
Mo 13.404832 16.382402 34.632111  
Mo 12.984592 11.922786 34.697941  
Mo 14.849264 13.441647 38.458412  
Mo 15.520794 15.904212 37.141048  
Mo 11.860759 15.626013 36.356945  
Mo 12.467666 12.011294 36.988945  
Mo 14.741085 11.603871 36.967529  
Mo 16.605524 13.898999 36.946575

06H60C13Tc

|                                 |                                 |
|---------------------------------|---------------------------------|
| H 13.162416 16.685461 20.715805 | C 14.968292 12.159991 25.129957 |
| H 11.465904 14.851361 20.647861 | C 15.955457 13.223618 25.173283 |
| H 15.822677 16.092548 20.694912 | C 15.145131 15.818636 25.273542 |
| H 16.559462 13.704990 20.601099 | C 13.727992 16.136606 25.284771 |
| H 14.706851 11.690176 20.525782 | C 12.874784 12.238130 26.376846 |
| H 12.266089 12.242156 20.546991 | C 14.266291 11.928557 26.362627 |
| C 16.170372 14.149302 21.517838 | C 16.093542 13.896061 26.435318 |
| C 15.771254 15.442718 21.569113 | C 15.665286 15.253059 26.483738 |
| C 12.940001 16.078541 21.594149 | C 13.037611 15.840551 26.505064 |
| C 12.020664 15.084449 21.557390 | C 12.069001 14.797336 26.473057 |
| C 12.878552 12.313669 21.446449 | C 14.967851 12.089341 27.615232 |
| C 14.199420 12.014697 21.434895 | C 15.944204 13.139951 27.661434 |
| C 15.112608 15.882709 22.805172 | C 15.127014 15.698392 27.748077 |
| C 13.744123 16.189678 22.817165 | C 13.735997 16.011364 27.757748 |
| C 11.927984 14.223371 22.742834 | C 11.902912 14.043335 27.699110 |
| C 12.341171 12.884299 22.689190 | C 12.334300 12.676196 27.642347 |
| C 14.951939 12.298145 22.665348 | C 16.114777 13.801852 28.918390 |
| C 15.903419 13.327109 22.704954 | C 15.679792 15.182688 28.963835 |
| C 13.037040 15.957413 24.055950 | C 13.034801 15.775381 28.984505 |
| C 12.053205 14.893676 24.018026 | C 12.053860 14.706551 28.954700 |
| C 12.851641 12.314342 23.916452 | C 12.865384 12.124822 28.851320 |
| C 14.269207 11.996010 23.902412 | C 14.275198 11.813124 28.835352 |
| C 16.101709 13.981485 23.978834 | C 15.152238 15.664547 30.198439 |
| C 15.672338 15.365133 24.032932 | C 13.735828 15.976638 30.205976 |
| C 11.879367 14.138059 25.212654 | C 11.903812 13.950204 30.164398 |
| C 12.314049 12.753358 25.156668 | C 12.313076 12.554491 30.112078 |
|                                 | C 14.978056 11.967845 30.083656 |

|                                  |                                 |
|----------------------------------|---------------------------------|
| C 15.945345 13.056245 30.131727  | 06H60C13Ru                      |
| C 13.043974 15.712198 31.451962  | H 13.136086 16.547272 20.657986 |
| C 12.084723 14.631158 31.419447  | H 11.454897 14.699043 20.631590 |
| C 12.858500 11.989464 31.305080  | H 15.799335 15.941795 20.639973 |
| C 14.260251 11.682091 31.284828  | H 16.554659 13.560227 20.609207 |
| C 16.088404 13.750286 31.387863  | H 14.723604 11.547305 20.585098 |
| C 15.681893 15.137094 31.437893  | H 12.283297 12.089853 20.591129 |
| C 11.882215 13.840505 32.638298  | C 16.168129 14.026080 21.516397 |
| C 12.418728 12.485495 32.621761  | C 15.758299 15.316897 21.533020 |
| C 14.901524 11.929848 32.572647  | C 12.924957 15.953568 21.548223 |
| C 15.922039 12.936906 32.597805  | C 12.014017 14.950992 21.533525 |
| C 15.198682 15.754833 32.694141  | C 12.891632 12.177324 21.492085 |
| C 13.757000 16.076132 32.695908  | C 14.214329 11.883955 21.488874 |
| Tc 14.029146 13.979006 33.132500 | C 15.103489 15.788971 22.759605 |
| Tc 14.024995 14.110481 35.718136 | C 13.733665 16.094997 22.765989 |
| Tc 15.856593 12.763367 34.628708 | C 11.929014 14.114910 22.738050 |
| Tc 11.765010 13.705865 34.677151 | C 12.350702 12.776796 22.719141 |
| Tc 15.677695 15.647935 34.760628 | C 14.965203 12.196261 22.712471 |
| Tc 12.997904 16.107088 34.605068 | C 15.910872 13.233685 22.726040 |
| Tc 13.532920 11.867660 34.428886 | C 13.029242 15.888985 24.010330 |
| Tc 14.252551 14.518457 38.122509 | C 12.050436 14.817944 23.995216 |
| Tc 14.371327 16.530159 36.482311 | C 12.863689 12.241619 23.960552 |
| Tc 11.998928 14.481907 37.133888 | C 14.281451 11.928520 23.957058 |
| Tc 12.364566 12.152654 36.764488 | C 16.105194 13.923399 23.981689 |
| Tc 14.663940 12.172191 37.247997 | C 15.667759 15.307006 23.999582 |
| Tc 16.375200 13.956854 36.612686 | C 11.883628 14.093789 25.207886 |
|                                  | C 12.321692 12.710749 25.188545 |

C 14.977020 12.129393 25.181717  
C 15.958987 13.196847 25.196787  
C 15.139271 15.788584 25.230125  
C 13.721511 16.098356 25.235380  
C 12.879877 12.225603 26.420080  
C 14.272143 11.921419 26.416101  
C 16.090912 13.900241 26.443222  
C 15.661335 15.259385 26.458439  
C 13.033625 15.833757 26.467033  
C 12.068831 14.784698 26.454107  
C 14.967909 12.120244 27.666420  
C 15.935594 13.174412 27.684834  
C 15.124640 15.736715 27.711950  
C 13.728266 16.040733 27.716120  
C 11.907704 14.060124 27.694792  
C 12.338057 12.694995 27.674324  
C 16.100296 13.866299 28.929647  
C 15.670870 15.246973 28.942429  
C 13.030195 15.826939 28.947830  
C 12.055829 14.757760 28.937134  
C 12.861310 12.167400 28.897638  
C 14.278626 11.856838 28.893513  
C 15.150386 15.760609 30.172478  
C 13.720903 16.073381 30.174568  
C 11.896864 14.029152 30.162868  
C 12.307259 12.631085 30.138121  
C 14.979868 12.043131 30.132595

C 15.940680 13.139371 30.157383  
C 13.021768 15.834037 31.408039  
C 12.077269 14.737914 31.399416  
C 12.851568 12.080026 31.343651  
C 14.257792 11.771690 31.340025  
C 16.076303 13.858001 31.395428  
C 15.683411 15.249509 31.406305  
C 11.951433 13.951998 32.636818  
C 12.423265 12.598502 32.634781  
C 14.866691 12.063754 32.629467  
C 15.861135 13.094172 32.636265  
C 15.161803 15.823752 32.663765  
C 13.731691 16.139538 32.664047  
Ru 14.039317 14.130773 33.171986  
Ru 14.003270 14.021893 35.794125  
Ru 16.019932 12.973118 34.650917  
Ru 11.740844 13.880527 34.642628  
Ru 15.677444 15.595256 34.688049  
Ru 13.126462 16.139870 34.675217  
Ru 13.568587 11.951046 34.350643  
Ru 13.981977 13.987005 38.211761  
Ru 14.477065 16.283863 36.753532  
Ru 11.922499 15.105339 36.784523  
Ru 12.306556 12.462996 36.813835  
Ru 14.917634 11.913171 36.817726  
Ru 16.336239 14.175861 36.800144

06H60C13Rh

|                                 |                                 |
|---------------------------------|---------------------------------|
| H 13.135277 16.505886 20.652967 | C 14.996051 12.141331 25.189276 |
| H 11.463727 14.651958 20.626820 | C 15.970948 13.213416 25.207661 |
| H 15.785007 15.946188 20.645296 | C 15.120044 15.791319 25.234657 |
| H 16.570814 13.575734 20.621004 | C 13.700625 16.084881 25.236017 |
| H 14.762197 11.562844 20.593563 | C 12.894203 12.212388 26.421438 |
| H 12.319116 12.074874 20.592796 | C 14.290751 11.925812 26.421455 |
| C 16.180599 14.038821 21.528042 | C 16.093086 13.919025 26.455555 |
| C 15.754184 15.324762 21.541008 | C 15.648086 15.273644 26.466227 |
| C 12.917139 15.922323 21.548136 | C 13.013839 15.818212 26.468731 |
| C 12.010074 14.916095 21.532921 | C 12.056700 14.761518 26.457420 |
| C 12.920579 12.164411 21.498095 | C 14.981758 12.129267 27.672194 |
| C 14.246679 11.886292 21.498596 | C 15.940800 13.194210 27.696648 |
| C 15.093748 15.791682 22.765842 | C 15.106269 15.750399 27.716354 |
| C 13.716961 16.079535 22.768579 | C 13.704707 16.036585 27.716824 |
| C 11.922010 14.086760 22.740822 | C 11.899763 14.036152 27.697287 |
| C 12.364541 12.752368 22.723103 | C 12.343596 12.673190 27.673140 |
| C 14.991053 12.201567 22.723236 | C 16.091513 13.888656 28.941540 |
| C 15.933284 13.245084 22.738277 | C 15.656254 15.269218 28.948017 |
| C 13.012224 15.869510 24.009388 | C 13.007113 15.815441 28.946770 |
| C 12.037209 14.792508 23.994946 | C 12.046854 14.732191 28.940739 |
| C 12.882583 12.226947 23.962852 | C 12.869459 12.146997 28.893332 |
| C 14.305445 11.931452 23.963097 | C 14.291933 11.853386 28.892536 |
| C 16.116161 13.938585 23.991505 | C 15.125057 15.776880 30.175241 |
| C 15.660673 15.318273 24.005690 | C 13.694693 16.070520 30.174000 |
| C 11.879307 14.068664 25.209333 | C 11.905109 13.998253 30.167463 |
| C 12.333242 12.692484 25.189020 | C 12.314610 12.604410 30.133598 |
|                                 | C 14.984812 12.050174 30.132011 |

|                                  |                                 |
|----------------------------------|---------------------------------|
| C 15.921406 13.160602 30.167601  | 06H60C13Pd                      |
| C 12.995174 15.829294 31.410717  | H 13.180736 16.608410 20.708160 |
| C 12.084758 14.701823 31.411158  | H 11.502575 14.764204 20.640539 |
| C 12.854438 12.036548 31.336288  | H 15.790115 16.020824 20.698912 |
| C 14.264258 11.743300 31.335070  | H 16.545856 13.647303 20.622580 |
| C 16.038620 13.875521 31.413528  | H 14.748059 11.665405 20.550032 |
| C 15.663971 15.273846 31.413803  | H 12.310637 12.201325 20.557875 |
| C 11.992441 13.901636 32.644913  | C 16.177738 14.097121 21.545174 |
| C 12.419695 12.538250 32.624378  | C 15.766148 15.388381 21.586815 |
| C 14.865413 12.026217 32.622765  | C 12.950327 16.016623 21.594521 |
| C 15.804190 13.102109 32.647270  | C 12.037876 15.013948 21.557148 |
| C 15.137308 15.873096 32.654388  | C 12.909997 12.258785 21.467232 |
| C 13.714276 16.171671 32.651917  | C 14.234103 11.968355 21.462748 |
| Rh 14.041932 14.192078 33.181545 | C 15.118741 15.842834 22.819923 |
| Rh 13.997726 14.000837 35.673573 | C 13.739036 16.151632 22.823280 |
| Rh 16.154943 12.978843 34.612461 | C 11.932672 14.165173 22.747574 |
| Rh 11.614254 13.909623 34.607620 | C 12.356523 12.821415 22.703415 |
| Rh 15.716568 15.703915 34.626137 | C 14.978015 12.241933 22.696894 |
| Rh 13.096164 16.242270 34.618042 | C 15.930724 13.281030 22.736853 |
| Rh 13.562711 11.887586 34.209034 | C 13.028866 15.916539 24.050871 |
| Rh 13.972030 13.896433 38.288334 | C 12.046739 14.842564 24.013224 |
| Rh 14.458187 16.262264 36.821182 | C 12.865270 12.265074 23.929884 |
| Rh 12.110283 15.176642 36.828781 | C 14.288564 11.953404 23.926422 |
| Rh 12.378488 12.475978 36.806427 | C 16.116859 13.945579 24.001457 |
| Rh 14.888493 11.965666 36.812263 | C 15.672056 15.330591 24.043650 |
| Rh 16.189812 14.340880 36.839745 | C 11.881804 14.093760 25.212603 |
|                                  | C 12.323655 12.715289 25.165401 |

C 14.977323 12.134509 25.158278  
C 15.959143 13.196605 25.201941  
C 15.129867 15.778986 25.280951  
C 13.717327 16.089989 25.284803  
C 12.876713 12.204547 26.390244  
C 14.268823 11.899353 26.387053  
C 16.087006 13.872302 26.466530  
C 15.650801 15.230411 26.501181  
C 13.021619 15.810179 26.508694  
C 12.054625 14.760295 26.476620  
C 14.960129 12.061053 27.643364  
C 15.932436 13.121597 27.691948  
C 15.110544 15.686408 27.755329  
C 13.712884 15.994339 27.758184  
C 11.884715 14.012309 27.700455  
C 12.324385 12.641788 27.648983  
C 16.080015 13.790681 28.947388  
C 15.654127 15.172788 28.976337  
C 13.008336 15.754518 28.981211  
C 12.038331 14.680876 28.954290  
C 12.842888 12.086429 28.854969  
C 14.262945 11.773170 28.852985  
C 15.117038 15.650040 30.209261  
C 13.699823 15.958901 30.211533  
C 11.900137 13.922571 30.168930  
C 12.300314 12.535784 30.103970  
C 14.948480 11.953275 30.101006

C 15.890779 13.046057 30.163939  
C 12.992561 15.717870 31.453014  
C 12.073258 14.590301 31.437664  
C 12.819860 11.947421 31.310415  
C 14.234052 11.636653 31.309759  
C 16.015528 13.725566 31.433851  
C 15.657033 15.135467 31.450928  
C 11.924289 13.755988 32.644581  
C 12.335832 12.409653 32.571659  
C 14.866967 11.854403 32.571465  
C 15.804379 12.905638 32.642612  
C 15.133633 15.778412 32.656891  
C 13.735440 16.083971 32.657944  
Pd 14.023573 14.064450 33.280514  
Pd 14.046320 14.206533 35.726238  
Pd 16.371130 13.291262 34.513134  
Pd 11.558773 14.339770 34.511753  
Pd 15.819436 15.957780 34.536160  
Pd 13.171298 16.537212 34.530029  
Pd 13.517069 11.750731 34.161644  
Pd 13.965397 13.850902 38.296265  
Pd 14.519879 16.424404 37.060783  
Pd 11.970030 15.295501 36.966644  
Pd 12.230348 12.477787 36.529514  
Pd 14.985167 11.883525 36.533802  
Pd 16.383516 14.341541 36.969185

06H60C13Ag

H 13.098666 16.686998 20.731808  
H 11.442931 14.829548 20.630089  
H 15.716036 16.159742 20.701275  
H 16.501818 13.798203 20.574722  
H 14.721697 11.797270 20.469969  
H 12.280411 12.292614 20.502991  
C 16.126888 14.223525 21.506294  
C 15.698639 15.508363 21.575985  
C 12.872496 16.079865 21.609085  
C 11.970189 15.068048 21.554487  
C 12.880269 12.333770 21.412735  
C 14.209854 12.064521 21.395254  
C 15.051792 15.931467 22.820431  
C 13.664414 16.201416 22.836130  
C 11.868022 14.198666 22.729172  
C 12.326661 12.863831 22.660629  
C 14.960924 12.319715 22.627489  
C 15.891358 13.380298 22.682579  
C 12.958319 15.942354 24.060911  
C 11.996787 14.850217 24.005138  
C 12.848290 12.284804 23.868752  
C 14.277651 12.001832 23.852652  
C 16.081423 14.017825 23.957830  
C 15.611847 15.396110 24.031178  
C 11.850945 14.073825 25.191319  
C 12.310643 12.703562 25.116098

C 14.968493 12.163980 25.085985  
C 15.930697 13.242506 25.142399  
C 15.066515 15.809493 25.278711  
C 13.649600 16.099651 25.294350  
C 12.872647 12.170991 26.327396  
C 14.269916 11.888053 26.311197  
C 16.055000 13.893048 26.421152  
C 15.598404 15.243289 26.488543  
C 12.965014 15.782274 26.517822  
C 12.020472 14.714844 26.467871  
C 14.970704 12.024652 27.564318  
C 15.916471 13.111777 27.626858  
C 15.068783 15.678145 27.754578  
C 13.657540 15.955411 27.769436  
C 11.856419 13.939006 27.676214  
C 12.322564 12.578723 27.594503  
C 16.084707 13.759862 28.892622  
C 15.618984 15.129970 28.952621  
C 12.957000 15.686408 28.985825  
C 12.011857 14.586702 28.941149  
C 12.850821 11.998729 28.787378  
C 14.277109 11.730694 28.771618  
C 15.063085 15.539637 30.204529  
C 13.652997 15.833967 30.219757  
C 11.893659 13.797868 30.137407  
C 12.320070 12.428353 30.043993  
C 14.971705 11.912954 30.017351



|                                  |                                 |
|----------------------------------|---------------------------------|
| C 15.911741 12.997697 30.095648  | 06H60C13Cd                      |
| C 12.976200 15.512351 31.465441  | H 13.122680 16.582535 20.589119 |
| C 12.044399 14.440133 31.435068  | H 11.436394 14.740209 20.525723 |
| C 12.885456 11.889313 31.258907  | H 15.806021 16.015757 20.572138 |
| C 14.280167 11.602478 31.237806  | H 16.577999 13.641353 20.490877 |
| C 16.028662 13.646544 31.395882  | H 14.736134 11.639837 20.404099 |
| C 15.622444 15.006387 31.432846  | H 12.293312 12.156596 20.422585 |
| C 11.751470 13.600715 32.608711  | C 16.178017 14.081047 21.405579 |
| C 12.354437 12.369762 32.485828  | C 15.758862 15.368169 21.448648 |
| C 15.018391 11.728485 32.462070  | C 12.910906 15.970768 21.467148 |
| C 15.866300 12.785733 32.554817  | C 11.995731 14.971609 21.433161 |
| C 15.127381 15.673738 32.625725  | C 12.897825 12.222054 21.328079 |
| C 13.759608 15.812871 32.634861  | C 14.223276 11.941396 21.318264 |
| Ag 13.418912 14.420984 34.315796 | C 15.092797 15.805199 22.681892 |
| Ag 15.368424 13.498516 37.423363 | C 13.717747 16.093266 22.689409 |
| Ag 16.170105 13.241738 34.670139 | C 11.909141 14.111914 22.620220 |
| Ag 10.776171 14.007282 34.532558 | C 12.345400 12.778174 22.569633 |
| Ag 16.143250 16.025331 34.448837 | C 14.971885 12.220431 22.550501 |
| Ag 13.414338 17.137581 34.578094 | C 15.918730 13.256029 22.593235 |
| Ag 13.615503 11.640332 34.137360 | C 13.012097 15.858717 23.927267 |
| Ag 13.371173 14.635577 38.839325 | C 12.029561 14.788039 23.889853 |
| Ag 14.762114 16.169222 36.886246 | C 12.865282 12.217246 23.793776 |
| Ag 12.056557 15.530396 36.525284 | C 14.286505 11.914314 23.783880 |
| Ag 12.760152 12.855129 36.575260 | C 16.108450 13.914767 23.863462 |
| Ag 14.969669 11.038706 36.372528 | C 15.660535 15.297735 23.909859 |
| Ag 17.436775 15.023625 36.621017 | C 11.871763 14.033446 25.084181 |
|                                  | C 12.321100 12.654346 25.031679 |

C 14.979518 12.083968 25.014023  
C 15.957440 13.156432 25.057758  
C 15.122243 15.738971 25.149351  
C 13.702172 16.040529 25.157663  
C 12.882808 12.142138 26.250320  
C 14.273113 11.843619 26.241718  
C 16.078272 13.826750 26.323797  
C 15.639046 15.178607 26.368677  
C 13.015037 15.743179 26.384537  
C 12.057277 14.692273 26.346699  
C 14.968459 12.004529 27.501188  
C 15.934284 13.063290 27.547909  
C 15.102475 15.628529 27.636135  
C 13.702994 15.928685 27.644840  
C 11.886354 13.933208 27.569059  
C 12.329775 12.570999 27.516186  
C 16.108454 13.726366 28.802860  
C 15.662153 15.113277 28.846783  
C 12.991480 15.684369 28.861530  
C 12.010021 14.606423 28.823429  
C 12.849962 12.009821 28.721741  
C 14.277496 11.704201 28.713814  
C 15.096740 15.531668 30.087185  
C 13.688849 15.829911 30.095123  
C 11.882978 13.841013 30.024324  
C 12.316651 12.470148 29.963652  
C 14.964172 11.902984 29.950916

C 15.921082 12.976611 30.006578  
C 13.004416 15.532997 31.345995  
C 12.067278 14.487705 31.318052  
C 12.878862 11.967095 31.197758  
C 14.257210 11.671279 31.191505  
C 16.032141 13.642656 31.299479  
C 15.610728 14.982143 31.333303  
C 11.803791 13.658445 32.500217  
C 12.268734 12.370404 32.442757  
C 14.986030 11.799793 32.432289  
C 15.937237 12.781583 32.483418  
C 15.093135 15.634268 32.534290  
C 13.751475 15.918917 32.540638  
Cd 14.004326 14.245284 34.826313  
Cd 13.978296 14.378513 38.516846  
Cd 16.807066 12.969296 34.481133  
Cd 10.963180 14.127769 34.467888  
Cd 16.172066 16.332636 34.423763  
Cd 12.968257 17.024950 34.386444  
Cd 13.483789 11.375845 34.108044  
Cd 14.364421 15.271615 41.241943  
Cd 15.920708 16.352064 37.305122  
Cd 12.933243 16.903191 37.258747  
Cd 11.437750 14.183647 37.219681  
Cd 13.526491 11.845755 36.927471  
Cd 16.299921 13.294692 37.214840

06H60C13Lu

|                                 |                                 |
|---------------------------------|---------------------------------|
| H 13.323584 16.184753 20.506826 | C 15.065125 12.208873 25.420109 |
| H 11.751342 14.258642 20.500769 | C 15.980534 13.324189 25.423750 |
| H 15.944613 15.740715 20.691504 | C 15.024658 15.847446 25.230507 |
| H 16.831533 13.426570 20.869015 | C 13.604754 16.082521 25.129543 |
| H 15.155592 11.381979 20.860477 | C 12.891874 12.259208 26.518082 |
| H 12.711515 11.788779 20.675961 | C 14.295543 12.028593 26.627081 |
| C 16.390305 13.928177 21.731413 | C 16.000696 14.105701 26.635368 |
| C 15.905601 15.193103 21.634106 | C 15.496365 15.436922 26.529613 |
| C 13.062693 15.666350 21.430593 | C 12.851741 15.869598 26.341614 |
| C 12.204088 14.614302 21.427277 | C 11.946387 14.768204 26.337532 |
| C 13.235068 11.926982 21.622711 | C 14.906758 12.318563 27.897264 |
| C 14.571514 11.704448 21.723501 | C 15.831195 13.440976 27.901695 |
| C 15.165357 15.718470 22.781818 | C 14.873091 15.981293 27.702974 |
| C 13.767917 15.954035 22.681505 | C 13.442641 16.217009 27.605404 |
| C 12.060717 13.864114 22.675245 | C 11.714722 14.112775 27.596153 |
| C 12.567615 12.540668 22.771362 | C 12.226946 12.756552 27.689945 |
| C 15.228168 12.100777 22.970547 | C 15.876638 14.220543 29.092363 |
| C 16.128948 13.199232 22.974113 | C 15.364210 15.583570 28.975922 |
| C 12.998739 15.784031 23.877804 | C 12.677866 16.020805 28.790958 |
| C 12.070844 14.648962 23.873972 | C 11.750127 14.895615 28.786463 |
| C 13.033092 12.118671 24.058578 | C 12.705478 12.346760 28.963020 |
| C 14.473653 11.878193 24.167789 | C 14.144224 12.116804 29.082891 |
| C 16.193758 13.976025 24.174644 | C 14.690784 16.074669 30.137604 |
| C 15.669441 15.339357 24.068680 | C 13.291954 16.285685 30.059492 |
| C 11.892366 13.992020 25.122540 | C 11.608541 14.236563 30.051718 |
| C 12.402659 12.646482 25.219677 | C 12.086755 12.904634 30.124218 |
|                                 | C 14.736487 12.460699 30.347004 |

|                                  |                                 |
|----------------------------------|---------------------------------|
| C 15.651844 13.565327 30.353075  | 06H60C13Hf                      |
| C 12.531267 16.143950 31.319569  | H 13.250230 16.334419 20.535219 |
| C 11.595984 15.005956 31.314814  | H 11.637412 14.431320 20.517582 |
| C 12.537206 12.484609 31.445238  | H 15.920137 15.875593 20.663832 |
| C 13.967751 12.273623 31.576973  | H 16.762691 13.525826 20.747406 |
| C 15.681946 14.350297 31.586458  | H 14.997838 11.448969 20.726463 |
| C 15.190178 15.709511 31.457970  | H 12.540860 11.875319 20.622280 |
| C 11.129644 14.237747 32.462540  | C 16.317888 14.004005 21.621096 |
| C 11.656930 12.851747 32.544769  | C 15.860870 15.278982 21.574932 |
| C 14.674641 12.445761 32.870338  | C 13.011904 15.780969 21.444344 |
| C 15.640988 13.616630 32.876625  | C 12.135958 14.746864 21.435114 |
| C 14.654244 16.494270 32.560318  | C 13.105926 12.020392 21.543554 |
| C 13.194128 16.740242 32.473103  | C 14.440320 11.788703 21.600267 |
| Lu 13.387595 14.478605 33.005085 | C 15.135985 15.767861 22.753019 |
| Lu 14.881085 13.239100 35.373840 | C 13.751868 16.014008 22.688757 |
| Lu 16.785633 11.702397 33.595375 | C 12.015238 13.963045 22.670599 |
| Lu 10.668060 13.392249 34.502552 | C 12.489314 12.638229 22.723192 |
| Lu 16.543739 15.574120 33.707016 | C 15.132281 12.170252 22.836163 |
| Lu 13.922262 17.352081 34.518646 | C 16.041759 13.242782 22.846149 |
| Lu 12.925962 11.169816 33.681644 | C 13.002829 15.831543 23.906416 |
| Lu 14.866168 13.238647 38.565224 | C 12.062248 14.718817 23.896919 |
| Lu 15.787195 15.927981 36.941040 | C 12.978099 12.172506 23.996679 |
| Lu 12.681362 15.041162 36.780647 | C 14.410660 11.916562 24.057995 |
| Lu 12.416636 11.816232 36.918583 | C 16.159197 13.983795 24.077375 |
| Lu 15.550516 10.549723 36.728600 | C 15.665468 15.352280 24.027464 |
| Lu 17.650215 13.117613 36.749222 | C 11.886564 14.033960 25.131222 |
|                                  | C 12.376039 12.671106 25.185177 |

C 15.044757 12.191662 25.300875  
C 15.979524 13.300308 25.311451  
C 15.062539 15.853226 25.214048  
C 13.636742 16.107937 25.149035  
C 12.898521 12.245623 26.455849  
C 14.299555 11.996500 26.514874  
C 16.032532 14.055489 26.534376  
C 15.555855 15.396425 26.485821  
C 12.914046 15.864732 26.369539  
C 11.995472 14.774653 26.359383  
C 14.937330 12.267571 27.781652  
C 15.860808 13.366495 27.791584  
C 14.963886 15.914091 27.697281  
C 13.549226 16.157724 27.633221  
C 11.804101 14.083913 27.612841  
C 12.278809 12.729247 27.666639  
C 15.972073 14.113251 29.007265  
C 15.493663 15.497175 28.958996  
C 12.809633 15.950918 28.839514  
C 11.869112 14.832438 28.828829  
C 12.763604 12.258730 28.928419  
C 14.208851 12.019012 28.987995  
C 14.870523 15.983700 30.147484  
C 13.457155 16.203247 30.084421  
C 11.717054 14.136072 30.063965  
C 12.169469 12.779018 30.117407  
C 14.840595 12.326162 30.227213

C 15.765883 13.425657 30.237413  
C 12.725404 15.996852 31.340279  
C 11.785275 14.876330 31.329536  
C 12.671206 12.333314 31.427944  
C 14.099257 12.094295 31.473854  
C 15.855419 14.180958 31.492731  
C 15.381778 15.550741 31.457426  
C 11.400578 14.135986 32.523216  
C 11.919028 12.741316 32.640579  
C 14.839478 12.217030 32.736301  
C 15.848226 13.414212 32.745277  
C 14.839902 16.212009 32.669018  
C 13.378243 16.490683 32.544693  
Hf 13.713512 14.195960 32.627125  
Hf 14.215049 13.757634 35.680607  
Hf 16.367716 11.945967 34.297363  
Hf 11.479115 13.826597 34.633553  
Hf 16.343992 15.182019 34.189041  
Hf 13.688202 16.454859 34.654839  
Hf 13.183297 11.424738 34.169449  
Hf 14.530812 13.475201 38.490005  
Hf 15.370052 15.952756 37.030968  
Hf 12.486940 15.210600 37.326511  
Hf 12.240778 12.240722 37.010052  
Hf 14.929092 11.185852 36.679497  
Hf 16.866741 13.484285 36.693546

06H60C13Ta

|                                 |                                 |
|---------------------------------|---------------------------------|
| H 13.207262 16.369102 20.563009 | C 15.036911 12.173551 25.262930 |
| H 11.568630 14.488859 20.561840 | C 15.983283 13.267389 25.264778 |
| H 15.853067 15.856496 20.629360 | C 15.099050 15.829825 25.200075 |
| H 16.670540 13.503149 20.690746 | C 13.677090 16.099604 25.167057 |
| H 14.908090 11.477829 20.685183 | C 12.915419 12.235325 26.460453 |
| H 12.462493 11.951610 20.620144 | C 14.316863 11.972174 26.492496 |
| C 16.262291 13.985550 21.579815 | C 16.072281 14.012443 26.493412 |
| C 15.818675 15.266665 21.546227 | C 15.606991 15.360033 26.461077 |
| C 12.977319 15.814318 21.473515 | C 12.970648 15.856627 26.399822 |
| C 12.085742 14.791896 21.473051 | C 12.044314 14.776608 26.399395 |
| C 13.038541 12.063494 21.539505 | C 14.991054 12.214839 27.740250 |
| C 14.369567 11.805930 21.575119 | C 15.929323 13.312590 27.741123 |
| C 15.129113 15.763419 22.740677 | C 15.039911 15.873534 27.683018 |
| C 13.743224 16.029661 22.705067 | C 13.623986 16.145964 27.655935 |
| C 11.978833 13.999801 22.703518 | C 11.866862 14.082681 27.654619 |
| C 12.443317 12.666507 22.736200 | C 12.331854 12.716349 27.685362 |
| C 15.086288 12.156563 22.805643 | C 16.061232 14.049329 28.957193 |
| C 16.013382 13.222961 22.807266 | C 15.584004 15.434203 28.926533 |
| C 13.016896 15.842746 23.933401 | C 12.901608 15.951916 28.873549 |
| C 12.060045 14.741604 23.932924 | C 11.957563 14.824802 28.868608 |
| C 12.945130 12.181042 23.994461 | C 12.854259 12.241063 28.929180 |
| C 14.380404 11.906342 24.030291 | C 14.290398 11.972045 28.959690 |
| C 16.157137 13.955829 24.033728 | C 14.980769 15.913771 30.126781 |
| C 15.677610 15.335608 23.998997 | C 13.582718 16.181448 30.106667 |
| C 11.905708 14.047159 25.166271 | C 11.841448 14.115517 30.098459 |
| C 12.376562 12.679393 25.198919 | C 12.293919 12.762774 30.133846 |
|                                 | C 14.968959 12.249029 30.187084 |

C 15.892065 13.346174 30.184948  
C 12.895441 15.949905 31.391436  
C 11.957553 14.844176 31.366188  
C 12.843680 12.333541 31.424654  
C 14.262625 12.044211 31.446711  
C 15.998150 14.092558 31.434740  
C 15.497578 15.449554 31.413458  
C 11.538202 14.121804 32.551838  
C 12.103806 12.710208 32.650703  
C 14.988679 12.163395 32.715294  
C 16.013918 13.365943 32.694752  
C 15.039518 16.098541 32.660954  
C 13.546687 16.387821 32.633808  
Ta 13.903017 14.149708 32.647976  
Ta 14.040833 13.792332 35.536228  
Ta 16.144997 12.385217 34.559677  
Ta 11.477022 13.807914 34.587929  
Ta 15.929926 15.291339 34.448910  
Ta 13.041118 16.148926 34.697868  
Ta 13.283567 11.684192 34.223938  
Ta 14.146698 13.655884 38.356014  
Ta 14.761517 15.977578 36.934113  
Ta 12.109986 15.006729 37.108788  
Ta 12.263365 12.250684 36.871944  
Ta 14.883196 11.570264 36.885197  
Ta 16.478273 13.842443 36.917656

06H60C13W

H 13.232327 16.510452 20.598625  
H 11.621827 14.603165 20.521826  
H 15.899422 16.034016 20.685583  
H 16.746689 13.684696 20.686491  
H 14.994305 11.594701 20.603693  
H 12.535406 12.038923 20.526619  
C 16.311447 14.135417 21.579273  
C 15.851869 15.410564 21.579344  
C 13.003805 15.919978 21.486626  
C 12.130362 14.884555 21.444372  
C 13.109965 12.156216 21.446213  
C 14.442207 11.915826 21.487999  
C 15.136571 15.858360 22.779388  
C 13.754051 16.104637 22.734369  
C 12.024442 14.055488 22.650856  
C 12.503206 12.733740 22.652643  
C 15.139583 12.259508 22.735479  
C 16.043200 13.334377 22.778885  
C 13.012883 15.875004 23.950836  
C 12.077191 14.765154 23.906265  
C 12.992586 12.217520 23.907749  
C 14.426581 11.961341 23.953384  
C 16.166945 14.031213 24.037434  
C 15.672768 15.397090 24.038332  
C 11.900766 14.034868 25.114681  
C 12.394125 12.670305 25.112885

C 15.068950 12.190709 25.198551  
C 16.005177 13.298830 25.245508  
C 15.079909 15.855004 25.247200  
C 13.651617 16.112177 25.199541  
C 12.928299 12.205126 26.365520  
C 14.330475 11.956305 26.409950  
C 16.061852 14.006855 26.493778  
C 15.577307 15.343413 26.493801  
C 12.934034 15.816794 26.407423  
C 12.016722 14.730077 26.366409  
C 14.976785 12.171817 27.681509  
C 15.901707 13.272752 27.730541  
C 14.983975 15.808062 27.729691  
C 13.578572 16.052103 27.680639  
C 11.831450 13.997272 27.601965  
C 12.318633 12.641944 27.596472  
C 15.993836 13.970004 28.968948  
C 15.519677 15.347317 28.976601  
C 12.847385 15.811779 28.886244  
C 11.919708 14.689645 28.842445  
C 12.825874 12.132925 28.830547  
C 14.249618 11.885617 28.876308  
C 14.922126 15.821275 30.182461  
C 13.504625 16.053968 30.123402  
C 11.773863 13.952372 30.061913  
C 12.223706 12.570752 30.065159  
C 14.891313 12.106902 30.146740

C 15.783331 13.247903 30.183010  
C 12.792050 15.784597 31.363846  
C 11.891656 14.661196 31.307590  
C 12.746571 12.053013 31.293980  
C 14.152143 11.802865 31.339256  
C 15.843378 13.965657 31.428675  
C 15.417649 15.340757 31.474642  
C 11.642531 13.890816 32.525452  
C 12.214085 12.532600 32.589165  
C 14.780752 12.053215 32.647694  
C 15.733517 13.135909 32.614853  
C 14.927192 15.989550 32.730549  
C 13.405033 16.282618 32.596443  
W 13.783131 14.216010 33.193085  
W 13.782054 14.110826 36.210957  
W 15.727154 12.971307 34.652393  
W 11.568135 13.827563 34.559635  
W 15.686966 15.545439 34.861683  
W 13.295443 16.375614 34.648582  
W 13.232189 11.919467 34.535484  
W 14.904195 13.434073 38.465965  
W 15.414550 15.885739 37.287590  
W 11.755693 15.526357 36.342083  
W 12.671420 11.870098 36.935188  
W 15.045565 11.625349 36.907276  
W 16.761892 13.962561 36.895809



06H60C13Re

|                                 |                                 |
|---------------------------------|---------------------------------|
| H 13.059298 16.609196 20.723545 | C 15.023356 12.175869 25.119627 |
| H 11.432698 14.723494 20.666639 | C 15.973779 13.268759 25.158060 |
| H 15.695167 16.141979 20.689848 | C 15.076898 15.828650 25.272612 |
| H 16.507721 13.784028 20.581696 | C 13.652728 16.096287 25.294529 |
| H 14.745942 11.725139 20.519526 | C 12.940883 12.177399 26.382318 |
| H 12.288281 12.173063 20.562126 | C 14.341508 11.910914 26.360172 |
| C 16.125317 14.214174 21.507929 | C 16.099623 13.934555 26.428793 |
| C 15.684630 15.494392 21.567148 | C 15.623325 15.274132 26.481169 |
| C 12.850598 16.012842 21.612135 | C 12.981791 15.780219 26.524658 |
| C 11.965017 14.985688 21.581627 | C 12.048996 14.706912 26.496851 |
| C 12.900416 12.256823 21.460762 | C 15.052082 12.069781 27.603010 |
| C 14.233561 12.014172 21.437820 | C 16.002266 13.162412 27.651064 |
| C 15.032564 15.914732 22.810905 | C 15.085378 15.700476 27.748934 |
| C 13.645924 16.168278 22.831490 | C 13.680817 15.975435 27.773846 |
| C 11.888906 14.130020 22.768276 | C 11.907128 13.944094 27.721123 |
| C 12.346878 12.797956 22.709009 | C 12.391088 12.586910 27.646124 |
| C 14.984229 12.315984 22.662663 | C 16.146374 13.818713 28.905851 |
| C 15.905856 13.380850 22.695881 | C 15.664188 15.189855 28.951982 |
| C 12.956740 15.905409 24.068163 | C 12.992263 15.715758 29.000675 |
| C 12.005991 14.804668 24.035629 | C 12.046635 14.607123 28.974365 |
| C 12.886850 12.248549 23.923845 | C 12.957871 12.050623 28.837370 |
| C 14.324209 11.985044 23.898903 | C 14.375948 11.768353 28.818724 |
| C 16.094179 14.036366 23.965487 | C 15.113628 15.636757 30.184422 |
| C 15.617055 15.411098 24.026428 | C 13.707423 15.900025 30.213205 |
| C 11.875821 14.044692 25.231928 | C 11.959712 13.840502 30.184195 |
| C 12.354118 12.679327 25.167580 | C 12.412110 12.468620 30.101692 |
|                                 | C 15.080267 11.933503 30.075298 |

|                                  |                                 |
|----------------------------------|---------------------------------|
| C 15.992855 13.062939 30.127428  | 06H60C13Os                      |
| C 13.040410 15.634073 31.492989  | H 13.137536 16.609650 20.710976 |
| C 12.109444 14.515459 31.460720  | H 11.443031 14.769937 20.667233 |
| C 12.979007 11.896059 31.274900  | H 15.828394 16.007696 20.685198 |
| C 14.378133 11.594652 31.267790  | H 16.568312 13.619038 20.614222 |
| C 16.100826 13.751060 31.385977  | H 14.700659 11.594105 20.561377 |
| C 15.664557 15.135079 31.431181  | H 12.257667 12.141974 20.588188 |
| C 11.912345 13.687957 32.676735  | C 16.172235 14.070581 21.524548 |
| C 12.540379 12.369625 32.576706  | C 15.771243 15.362896 21.562912 |
| C 14.954332 11.887922 32.586815  | C 12.928858 16.000313 21.591011 |
| C 15.908067 12.965593 32.608746  | C 12.012376 15.003883 21.567478 |
| C 15.246361 15.819072 32.667694  | C 12.875953 12.225519 21.482693 |
| C 13.735197 16.161364 32.700188  | C 14.196508 11.929614 21.468437 |
| Re 14.042402 14.071194 33.096870 | C 15.109399 15.811227 22.795549 |
| Re 13.909668 14.040506 35.674946 | C 13.744006 16.116049 22.807827 |
| Re 15.885498 12.919201 34.684322 | C 11.932068 14.150023 22.760975 |
| Re 11.597976 13.800883 34.769466 | C 12.346521 12.815522 22.721354 |
| Re 15.908496 15.632699 34.640327 | C 14.952841 12.230454 22.692900 |
| Re 13.387325 16.346880 34.770641 | C 15.901029 13.258558 22.719711 |
| Re 13.530166 11.860308 34.350113 | C 13.040847 15.893801 24.054375 |
| Re 13.132352 14.366158 38.019699 | C 12.061028 14.833939 24.030865 |
| Re 14.783933 16.130173 36.842148 | C 12.860876 12.259096 23.956738 |
| Re 11.748124 15.646714 36.367256 | C 14.273445 11.943257 23.940695 |
| Re 12.345565 12.373590 36.640141 | C 16.102539 13.925289 23.989796 |
| Re 14.897155 12.648032 37.551430 | C 15.672105 15.304407 24.030237 |
| Re 16.523394 14.202202 36.717117 | C 11.887146 14.095263 25.236658 |
|                                  | C 12.322135 12.709307 25.194365 |

C 14.977305 12.111339 25.165874  
C 15.964161 13.176612 25.193968  
C 15.150651 15.771410 25.268042  
C 13.733046 16.091837 25.280380  
C 12.883652 12.205031 26.415106  
C 14.276432 11.889552 26.399956  
C 16.105164 13.858798 26.449062  
C 15.672131 15.217220 26.480978  
C 13.043166 15.818626 26.504541  
C 12.074268 14.771799 26.487226  
C 14.979498 12.068371 27.648708  
C 15.951782 13.112947 27.681835  
C 15.132392 15.671363 27.739388  
C 13.747265 15.996193 27.752142  
C 11.924088 14.028871 27.722672  
C 12.353713 12.669569 27.675869  
C 16.127134 13.788657 28.938248  
C 15.686458 15.164242 28.960371  
C 13.049714 15.776613 28.986052  
C 12.072645 14.711719 28.977453  
C 12.885529 12.131445 28.895002  
C 14.290345 11.805922 28.880054  
C 15.178996 15.680571 30.188673  
C 13.750319 16.007299 30.203835  
C 11.925890 13.976846 30.201357  
C 12.334885 12.576215 30.146061  
C 15.003379 11.961031 30.120892

C 15.969684 13.055695 30.162529  
C 13.058864 15.773993 31.446617  
C 12.124703 14.665446 31.450119  
C 12.890259 11.999794 31.322903  
C 14.276409 11.658645 31.307312  
C 16.081844 13.767735 31.403227  
C 15.720525 15.163849 31.412462  
C 12.012565 13.852779 32.696445  
C 12.508137 12.501834 32.636787  
C 14.843771 11.955988 32.623978  
C 15.809640 13.023135 32.650124  
C 15.236646 15.777932 32.668266  
C 13.795687 16.171206 32.676216  
Os 14.050351 14.157193 33.326149  
Os 14.113925 14.057003 35.867714  
Os 16.071253 12.867909 34.737267  
Os 11.698884 13.640503 34.757832  
Os 15.842254 15.549246 34.702465  
Os 13.407223 16.452641 34.713039  
Os 13.692075 11.842715 34.365768  
Os 12.652616 14.921152 37.720455  
Os 14.608304 16.249199 36.873779  
Os 11.452799 15.681476 35.804852  
Os 12.424379 12.556516 36.922569  
Os 14.765421 11.823058 36.733578  
Os 16.519020 14.111869 36.697483

06H60C13Ir

|                                 |                                 |
|---------------------------------|---------------------------------|
| H 13.136335 16.556639 20.662956 | C 14.976855 12.127829 25.167759 |
| H 11.455433 14.709041 20.628149 | C 15.957287 13.194856 25.192831 |
| H 15.802095 15.967298 20.650887 | C 15.129781 15.783378 25.237473 |
| H 16.568291 13.589199 20.610563 | C 13.712234 16.092558 25.241875 |
| H 14.732449 11.581433 20.567596 | C 12.877681 12.212357 26.404121 |
| H 12.290266 12.110554 20.572973 | C 14.271557 11.909145 26.400164 |
| C 16.176285 14.048909 21.518433 | C 16.086845 13.890228 26.444199 |
| C 15.761734 15.337897 21.540579 | C 15.652449 15.247687 26.463053 |
| C 12.922298 15.962283 21.551826 | C 13.023616 15.821905 26.471359 |
| C 12.010675 14.960350 21.532621 | C 12.060231 14.771081 26.454479 |
| C 12.895005 12.192996 21.476507 | C 14.966156 12.099398 27.650917 |
| C 14.219435 11.906898 21.473238 | C 15.931800 13.156072 27.681637 |
| C 15.099245 15.798568 22.767006 | C 15.115252 15.717178 27.716772 |
| C 13.727806 16.099648 22.771736 | C 13.718356 16.021915 27.720737 |
| C 11.923223 14.119798 22.733345 | C 11.899371 14.039700 27.691349 |
| C 12.349238 12.782258 22.706266 | C 12.333886 12.676067 27.658056 |
| C 14.967324 12.212927 22.699150 | C 16.091188 13.840448 28.932701 |
| C 15.914944 13.248940 22.721758 | C 15.661262 15.220969 28.943687 |
| C 13.022178 15.887127 24.014503 | C 13.020367 15.800895 28.949354 |
| C 12.044477 14.815787 23.994463 | C 12.048677 14.728331 28.940161 |
| C 12.863888 12.243948 23.944626 | C 12.857077 12.141408 28.877655 |
| C 14.282782 11.936512 23.940475 | C 14.273769 11.830963 28.874628 |
| C 16.105057 13.929341 23.982328 | C 15.142444 15.731459 30.173292 |
| C 15.661753 15.310695 24.005875 | C 13.712141 16.044319 30.174828 |
| C 11.878447 14.085657 25.204376 | C 11.898267 13.993901 30.164633 |
| C 12.320310 12.704656 25.175560 | C 12.301462 12.594625 30.119844 |
|                                 | C 14.972785 12.008444 30.115753 |

|                                  |                                 |
|----------------------------------|---------------------------------|
| C 15.923870 13.110481 30.158768  | 06H60C13Pt                      |
| C 13.007691 15.813028 31.407074  | H 13.234562 16.595009 20.740719 |
| C 12.084770 14.690537 31.410255  | H 11.561701 14.746059 20.645227 |
| C 12.842916 12.018056 31.311352  | H 15.841306 16.010086 20.770754 |
| C 14.243539 11.712882 31.310505  | H 16.594358 13.635758 20.704243 |
| C 16.049507 13.819086 31.406729  | H 14.817539 11.639538 20.613445 |
| C 15.684210 15.223977 31.405685  | H 12.381822 12.180089 20.573486 |
| C 11.970400 13.884418 32.658978  | C 16.215183 14.085097 21.622580 |
| C 12.424357 12.511951 32.612392  | C 15.805463 15.377183 21.657896 |
| C 14.830332 11.985624 32.612293  | C 12.992020 15.999599 21.621563 |
| C 15.819364 13.038897 32.658554  | C 12.083074 14.995168 21.570059 |
| C 15.175631 15.862966 32.653091  | C 12.963996 12.239138 21.493658 |
| C 13.734810 16.181694 32.651295  | C 14.286658 11.945330 21.515596 |
| Ir 14.051659 14.189892 33.184490 | C 15.138894 15.828372 22.881716 |
| Ir 14.011395 14.027828 35.700890 | C 13.759487 16.134609 22.863834 |
| Ir 16.170681 13.042344 34.688629 | C 11.959863 14.144258 22.759333 |
| Ir 11.633726 13.996601 34.687702 | C 12.389035 12.802694 22.720715 |
| Ir 15.746541 15.705164 34.664825 | C 15.010565 12.224963 22.760321 |
| Ir 13.134797 16.265144 34.655422 | C 15.959553 13.267937 22.812592 |
| Ir 13.548349 11.888273 34.233612 | C 13.033530 15.895226 24.080919 |
| Ir 13.998074 13.971995 38.317070 | C 12.048277 14.820724 24.028694 |
| Ir 14.469412 16.158270 36.914856 | C 12.878654 12.246748 23.956568 |
| Ir 12.079619 15.233809 36.881027 | C 14.302246 11.934704 23.977634 |
| Ir 12.353729 12.536796 36.798172 | C 16.124826 13.932780 24.078739 |
| Ir 14.915224 11.994243 36.806519 | C 15.678522 15.318811 24.114017 |
| Ir 16.271626 14.339578 36.898685 | C 11.869048 14.071090 25.223091 |
|                                  | C 12.315466 12.693589 25.182068 |

C 14.971461 12.119362 25.218882  
C 15.950216 13.184660 25.277512  
C 15.117228 15.762577 25.344774  
C 13.703386 16.067921 25.323889  
C 12.853106 12.185896 26.414652  
C 14.242503 11.885412 26.434393  
C 16.056517 13.858981 26.545147  
C 15.618712 15.213800 26.575562  
C 12.989914 15.782612 26.537918  
C 12.024319 14.735231 26.492674  
C 14.914993 12.046831 27.703026  
C 15.885139 13.103766 27.768312  
C 15.055585 15.666673 27.825638  
C 13.655350 15.975058 27.800838  
C 11.829541 13.986377 27.713963  
C 12.273082 12.612954 27.667274  
C 16.023968 13.768058 29.030853  
C 15.582636 15.154013 29.053802  
C 12.922797 15.735104 29.003500  
C 11.947590 14.660611 28.968513  
C 12.775182 12.067574 28.877131  
C 14.202558 11.751435 28.902138  
C 15.002141 15.601983 30.276249  
C 13.595043 15.903675 30.245171  
C 11.802198 13.906224 30.182720  
C 12.212439 12.534439 30.112268  
C 14.863840 11.944578 30.153408

C 15.814566 13.019344 30.235964  
C 12.866729 15.651509 31.471685  
C 11.939498 14.568031 31.474833  
C 12.716753 11.983496 31.331604  
C 14.118509 11.668459 31.361185  
C 15.888979 13.704483 31.520103  
C 15.476320 15.046134 31.525232  
C 11.761350 13.765860 32.697109  
C 12.208860 12.439325 32.584244  
C 14.684992 11.883493 32.637146  
C 15.708047 12.901265 32.768074  
C 14.929505 15.643884 32.765934  
C 13.570631 16.110273 32.658005  
Pt 14.678514 14.131491 34.226974  
Pt 13.587643 13.633827 37.021545  
Pt 17.154947 12.415154 34.026463  
Pt 11.838628 14.456361 34.563404  
Pt 16.228350 16.347797 34.150032  
Pt 12.549009 16.877216 34.085144  
Pt 13.377864 11.900258 34.151546  
Pt 15.492550 15.183141 37.758980  
Pt 14.289201 16.325068 35.863663  
Pt 12.016006 15.733395 36.836754  
Pt 11.664978 12.325149 36.027760  
Pt 15.320745 12.041101 36.041557  
Pt 16.799742 14.264121 35.795391

06H60C13Au

H 13.177605 16.820675 20.747908  
H 11.485989 14.991166 20.600958  
H 15.808296 16.234333 20.714952  
H 16.558353 13.861578 20.530426  
H 14.738299 11.888751 20.367214  
H 12.303390 12.430767 20.401731  
C 16.181431 14.268874 21.468979  
C 15.774011 15.557729 21.569386  
C 12.948181 16.186108 21.604404  
C 12.029235 15.192688 21.524601  
C 12.902313 12.443560 21.313107  
C 14.225698 12.148828 21.293690  
C 15.117441 15.953599 22.819843  
C 13.742009 16.259336 22.835833  
C 11.925754 14.290862 22.676678  
C 12.348174 12.951251 22.573259  
C 14.970606 12.369768 22.537870  
C 15.926184 13.401724 22.624264  
C 13.033478 15.974949 24.058172  
C 12.044889 14.913110 23.972290  
C 12.860758 12.342156 23.774878  
C 14.278847 12.025127 23.753836  
C 16.109411 14.010312 23.918449  
C 15.673978 15.392291 24.025066  
C 11.878099 14.111064 25.137569  
C 12.315728 12.734048 25.030577

C 14.968653 12.146896 24.992983  
C 15.951240 13.206959 25.084116  
C 15.136567 15.789772 25.282433  
C 13.721747 16.100718 25.297951  
C 12.866194 12.164621 26.229250  
C 14.259411 11.856844 26.206484  
C 16.082502 13.825402 26.374336  
C 15.654400 15.182607 26.476980  
C 13.028391 15.764383 26.508091  
C 12.058043 14.720237 26.427195  
C 14.953306 11.967672 27.466152  
C 15.927828 13.017044 27.562225  
C 15.115890 15.581613 27.754543  
C 13.718422 15.894770 27.767542  
C 11.891789 13.915922 27.617115  
C 12.317496 12.548089 27.509346  
C 16.090952 13.630433 28.848511  
C 15.660378 15.007406 28.948809  
C 13.011317 15.599477 28.974451  
C 12.030168 14.540110 28.899075  
C 12.847715 11.953021 28.698442  
C 14.259625 11.631477 28.668600  
C 15.110528 15.391368 30.207861  
C 13.703188 15.716455 30.216415  
C 11.889231 13.740463 30.079357  
C 12.312960 12.366316 29.966341  
C 14.961533 11.755924 29.911938

|                                  |                                 |
|----------------------------------|---------------------------------|
| C 15.913278 12.833651 30.023991  | 06H60C13Hg                      |
| C 12.987510 15.429419 31.440674  | H 13.155183 16.290358 20.527027 |
| C 12.042674 14.365021 31.375011  | H 11.473030 14.438179 20.519373 |
| C 12.877030 11.802402 31.158405  | H 15.867924 15.740370 20.548346 |
| C 14.251170 11.460350 31.118753  | H 16.630899 13.355119 20.551693 |
| C 16.062969 13.448382 31.335438  | H 14.770671 11.290843 20.544662 |
| C 15.629132 14.802393 31.428699  | H 12.320156 11.799447 20.530012 |
| C 11.873981 13.520647 32.560570  | C 16.212990 13.825635 21.442345 |
| C 12.406251 12.266212 32.439171  | C 15.800840 15.115697 21.439657 |
| C 14.935000 11.639031 32.361683  | C 12.942748 15.704378 21.421864 |
| C 15.964896 12.524542 32.470646  | C 12.032003 14.702506 21.417589 |
| C 15.060473 15.381386 32.635986  | C 12.928224 11.927481 21.426212 |
| C 13.750466 15.745502 32.640003  | C 14.254088 11.651522 21.434700 |
| Au 15.194599 16.174326 37.044422 | C 15.113153 15.586296 22.651026 |
| Au 14.090133 13.619488 38.007393 | C 13.742503 15.866895 22.643072 |
| Au 16.549650 12.816779 34.376610 | C 11.947029 13.883947 22.634705 |
| Au 11.591882 14.217110 34.440285 | C 12.375501 12.551183 22.637724 |
| Au 15.822491 15.406456 34.532410 | C 14.994790 12.007775 22.652840 |
| Au 13.131031 16.440414 34.456524 | C 15.934374 13.043758 22.656319 |
| Au 13.634585 11.686453 34.020844 | C 13.030447 15.674274 23.888365 |
| Au 13.428075 16.012705 39.112846 | C 12.055972 14.607588 23.884064 |
| Au 12.990658 17.700949 36.825157 | C 12.890597 12.042654 23.890488 |
| Au 11.956679 15.091453 36.899269 | C 14.305115 11.746788 23.900871 |
| Au 12.381224 12.400339 36.267693 | C 16.116489 13.749921 23.909222 |
| Au 15.013277 11.536405 36.342594 | C 15.672562 15.125201 23.903877 |
| Au 16.573256 13.907532 36.832443 | C 11.881015 13.901003 25.106865 |
|                                  | C 12.330790 12.518734 25.108845 |



C 14.993862 11.960732 25.128021  
C 15.972821 13.036631 25.133345  
C 15.134510 15.624160 25.123199  
C 13.711007 15.917764 25.114719  
C 12.885707 12.051289 26.342892  
C 14.282063 11.763996 26.356550  
C 16.088394 13.757700 26.367939  
C 15.653108 15.115267 26.358345  
C 13.020311 15.665431 26.343533  
C 12.058415 14.609399 26.340033  
C 14.961404 11.993846 27.615456  
C 15.921605 13.050631 27.625362  
C 15.104135 15.608105 27.603203  
C 13.710071 15.890358 27.593611  
C 11.900764 13.893033 27.585724  
C 12.328072 12.534702 27.585184  
C 16.090366 13.761247 28.861147  
C 15.661062 15.150759 28.846518  
C 12.997019 15.682647 28.824099  
C 12.029463 14.614857 28.822124  
C 12.840088 12.022460 28.823030  
C 14.263400 11.731805 28.841261  
C 15.097925 15.645013 30.057499  
C 13.675715 15.917721 30.055107  
C 11.872463 13.908696 30.051422  
C 12.285925 12.519468 30.039238  
C 14.951082 11.961426 30.076000

C 15.914181 13.043053 30.089836  
C 12.943570 15.710413 31.300486  
C 12.015918 14.642873 31.302183  
C 12.844635 12.059826 31.289366  
C 14.230680 11.748632 31.313541  
C 16.014690 13.767374 31.342199  
C 15.585998 15.119606 31.319635  
C 11.758650 13.824648 32.496017  
C 12.250297 12.601414 32.464180  
C 14.943081 12.016608 32.535118  
C 15.809669 13.011363 32.548828  
C 14.954014 15.669078 32.462627  
C 13.720077 16.116707 32.484161  
Hg 15.851823 14.404064 34.387543  
Hg 14.287790 14.838476 36.824657  
Hg 18.840498 12.106636 34.381294  
Hg 11.068382 14.699613 34.430687  
Hg 15.824007 17.911167 35.365799  
Hg 12.883411 17.133135 34.354210  
Hg 13.511909 11.657068 34.331299  
Hg 15.960894 14.367908 39.866383  
Hg 12.596119 17.548498 37.449814  
Hg 10.842259 14.843451 37.362503  
Hg 12.675906 12.215557 37.027367  
Hg 16.229912 11.803720 36.933460  
Hg 18.011293 15.132637 36.625027

05H60C13Sc

H 12.941982 12.700831 20.089800  
H 15.221282 11.882064 20.242313  
H 16.431711 13.959078 20.282299  
H 14.967958 15.881562 20.179827  
H 12.718343 15.114347 20.061893  
C 16.343441 13.974310 21.370438  
C 15.902286 15.165505 22.024666  
C 14.898218 15.848503 21.268913  
C 13.616116 15.909915 21.907530  
C 12.710174 15.081726 21.152933  
C 12.359479 13.869843 21.834532  
C 12.883202 12.715395 21.179939  
C 13.824528 11.968139 21.941668  
C 15.129488 11.960049 21.326839  
C 16.068487 12.766678 22.074024  
C 15.814432 15.179697 23.454315  
C 14.775092 15.939461 24.110157  
C 13.547807 15.899172 23.321770  
C 12.506913 15.120541 23.993584  
C 12.293779 13.886949 23.265574  
C 12.658175 12.708894 24.019516  
C 13.745213 12.007781 23.367584  
C 14.960329 11.990362 24.169399  
C 15.964267 12.805833 23.491734  
C 16.252913 14.033005 24.214703  
C 14.692233 15.939018 25.514198

C 13.387464 15.924015 26.167025  
C 12.445267 15.116174 25.395569  
C 12.069613 13.899824 26.109730  
C 12.574087 12.720661 25.427307  
C 13.557010 11.994678 26.212435  
C 14.867415 12.032391 25.565506  
C 15.818200 12.834154 26.336632  
C 16.166176 14.050870 25.620838  
C 15.705357 15.250309 26.304020  
C 13.314187 15.920280 27.567127  
C 12.280272 15.139084 28.241669  
C 11.992413 13.910872 27.511328  
C 12.382753 12.727011 28.265940  
C 13.475639 12.016647 27.611992  
C 14.697549 12.067553 28.408319  
C 15.723332 12.857785 27.735516  
C 16.023546 14.084981 28.461359  
C 15.625782 15.265502 27.704542  
C 14.537642 15.982246 28.360231  
C 12.204400 15.146179 29.641693  
C 11.816434 13.931076 30.351372  
C 12.303082 12.739156 29.667646  
C 13.305408 12.028709 30.453249  
C 14.613424 12.087736 29.806955  
C 15.562835 12.884295 30.572741  
C 15.942309 14.098128 29.862072  
C 15.477658 15.301881 30.545425

C 14.456581 15.989807 29.760763  
C 13.150993 15.948432 30.408066  
C 11.716960 13.944502 31.764526  
C 12.075094 12.714874 32.524887  
C 13.219626 12.028313 31.866314  
C 14.474674 12.043939 32.669392  
C 15.494246 12.887381 31.989374  
C 15.857180 14.126688 32.726784  
C 15.409524 15.323497 31.958950  
C 14.315958 16.091797 32.620575  
C 13.064482 15.977090 31.821934  
C 11.971772 15.218797 32.495193  
Sc 14.419679 16.922604 34.580307  
Sc 11.165525 15.744510 34.393913  
Sc 13.697309 14.047167 33.325340  
Sc 12.531468 16.625231 37.197243  
Sc 16.551186 14.190470 34.745441  
Sc 15.525725 15.759809 37.386120  
Sc 13.500905 14.111330 36.076019  
Sc 11.268765 12.277106 34.449951  
Sc 10.780292 14.041491 37.124893  
Sc 14.602657 11.304815 34.669361  
Sc 13.329594 14.147064 38.979317  
Sc 15.630001 12.638287 37.428356  
Sc 12.692700 11.574149 37.268612

H 13.066521 12.464782 20.191401  
H 15.468790 12.223014 20.324533  
H 16.445448 14.430210 20.376104  
H 14.633954 16.024944 20.277077  
H 12.539368 14.819281 20.163656  
C 16.322083 14.416656 21.460403  
C 15.688787 15.513775 22.130463  
C 14.567109 15.967128 21.365023  
C 13.300422 15.754809 21.998198  
C 12.538987 14.794231 21.254890  
C 12.332081 13.557541 21.948317  
C 13.046898 12.510075 21.281734  
C 14.130668 11.966599 22.045076  
C 15.377481 12.276276 21.410879  
C 16.208372 13.170858 22.160246  
C 15.595938 15.496170 23.551962  
C 14.418827 16.035030 24.211809  
C 13.236475 15.733824 23.421238  
C 12.327194 14.821968 24.096174  
C 12.280530 13.563164 23.369915  
C 12.847948 12.459325 24.127054  
C 14.056169 11.991693 23.468594  
C 15.252871 12.218714 24.260460  
C 16.106359 13.181381 23.580933  
C 16.228762 14.431553 24.313873  
C 14.339771 16.021406 25.613390  
C 13.061584 15.766644 26.267002

05H60C13Ti

C 12.264269 14.816852 25.497808  
C 12.085242 13.558571 26.214478  
C 12.778941 12.473069 25.529428  
C 13.892410 11.958597 26.317999  
C 15.165565 12.233539 25.662344  
C 15.978501 13.168428 26.433357  
C 16.135939 14.428818 25.714090  
C 15.462544 15.525182 26.401041  
C 12.989594 15.762405 27.667530  
C 12.112865 14.819196 28.346811  
C 12.015054 13.563282 27.614634  
C 12.623102 12.482836 28.378675  
C 13.814248 11.968674 27.718639  
C 15.003340 12.241800 28.512226  
C 15.892676 13.174269 27.833725  
C 15.975545 14.432293 28.564449  
C 15.380629 15.521891 27.801764  
C 14.182840 16.023079 28.459688  
C 12.010330 14.830726 29.750015  
C 11.819308 13.558685 30.455885  
C 12.527057 12.465562 29.783039  
C 13.647193 11.931743 30.558596  
C 14.935698 12.219927 29.917347  
C 15.756620 13.162743 30.677011  
C 15.919322 14.437822 29.969109  
C 15.236083 15.544432 30.643032  
C 14.104737 16.049503 29.863096

C 12.810481 15.794775 30.506781  
C 11.693916 13.552441 31.859228  
C 12.289463 12.383196 32.636635  
C 13.562427 11.885938 31.965187  
C 14.829259 12.128992 32.780594  
C 15.720055 13.145896 32.089054  
C 15.857031 14.466098 32.834763  
C 15.188859 15.587317 32.055363  
C 13.956481 16.170685 32.723415  
C 12.705258 15.842454 31.913921  
C 11.747520 14.885612 32.602592  
Ti 15.258272 15.807002 34.349483  
Ti 12.456734 16.101576 34.178638  
Ti 13.738802 14.010523 32.743000  
Ti 13.721886 16.299992 36.690212  
Ti 15.854811 13.053670 34.385754  
Ti 15.744816 14.494029 36.808285  
Ti 13.587005 14.022625 35.505356  
Ti 11.303571 13.508370 34.111137  
Ti 11.402462 14.928924 36.570793  
Ti 13.421689 11.619856 34.238178  
Ti 13.406699 14.011405 38.121635  
Ti 14.640393 12.025029 36.759365  
Ti 11.973062 12.308632 36.614410

05H60C13V

H 12.856409 12.668150 20.125257

|                                 |                                 |
|---------------------------------|---------------------------------|
| H 15.183770 12.019453 20.259377 | C 12.076377 13.898127 26.149311 |
| H 16.498005 14.045205 20.324942 | C 12.570098 12.712771 25.460119 |
| H 15.010883 15.940988 20.226238 | C 13.571841 12.000540 26.242767 |
| H 12.756798 15.084438 20.105251 | C 14.874447 12.068338 25.593954 |
| C 16.379959 14.049668 21.410011 | C 15.829997 12.849988 26.366716 |
| C 15.955257 15.239647 22.080479 | C 16.184065 14.073767 25.660114 |
| C 14.932489 15.887941 21.313618 | C 15.715958 15.264902 26.353302 |
| C 13.645511 15.882271 21.944820 | C 13.322031 15.919750 27.613949 |
| C 12.743666 15.059377 21.196463 | C 12.296366 15.131407 28.282175 |
| C 12.329283 13.872631 21.881590 | C 12.008770 13.905634 27.552109 |
| C 12.845007 12.713181 21.215761 | C 12.398419 12.716288 28.300909 |
| C 13.815270 11.984424 21.976116 | C 13.495029 12.017076 27.644512 |
| C 15.099353 12.084660 21.345602 | C 14.714302 12.064962 28.437967 |
| C 16.057732 12.837758 22.099665 | C 15.737500 12.858915 27.768229 |
| C 15.851549 15.230282 23.502623 | C 16.026148 14.079465 28.506283 |
| C 14.788723 15.967288 24.161860 | C 15.623970 15.260913 27.757563 |
| C 13.574225 15.865919 23.367456 | C 14.540727 15.982907 28.414341 |
| C 12.529789 15.111071 24.037968 | C 12.214220 15.137334 29.686468 |
| C 12.276212 13.882452 23.306616 | C 11.823751 13.916533 30.376167 |
| C 12.635274 12.692484 24.056477 | C 12.317360 12.721532 29.701294 |
| C 13.742285 12.018129 23.397633 | C 13.326971 12.015661 30.489254 |
| C 14.960321 12.042274 24.191677 | C 14.631809 12.071596 29.843044 |
| C 15.955932 12.859549 23.521362 | C 15.581466 12.856548 30.619274 |
| C 16.282822 14.068080 24.256336 | C 15.939769 14.081893 29.911005 |
| C 14.703808 15.957033 25.565409 | C 15.460464 15.275853 30.590294 |
| C 13.397619 15.924352 26.213634 | C 14.454594 15.986025 29.815613 |
| C 12.466967 15.110126 25.442316 | C 13.145159 15.951967 30.468359 |

C 11.744244 13.922534 31.783352  
C 12.126190 12.728012 32.560997  
C 13.247791 12.021788 31.902317  
C 14.469264 12.060469 32.746872  
C 15.499571 12.861034 32.033936  
C 15.813416 14.101638 32.776951  
C 15.378011 15.281545 31.999773  
C 14.298420 16.017670 32.698128  
C 13.061284 15.961250 31.880970  
C 12.030579 15.150412 32.553185  
V 14.537476 16.158535 34.719578  
V 11.455677 14.837320 34.489059  
V 13.717331 14.019228 33.157799  
V 12.479383 15.943627 36.859947  
V 15.839080 14.231028 34.778366  
V 15.202826 15.271883 37.091759  
V 13.418006 14.301274 35.625809  
V 11.916498 12.510434 34.543304  
V 11.114457 13.698515 36.645164  
V 14.381721 12.162221 34.801785  
V 13.007937 14.342843 38.143990  
V 15.212478 13.256880 37.098141  
V 12.891837 12.240337 36.977184

05H60C13Cr

H 12.856101 12.640569 20.142548  
H 15.169676 11.972655 20.286863

H 16.498440 13.983994 20.339287  
H 15.015938 15.883292 20.225945  
H 12.748267 15.052381 20.103409  
C 16.377432 13.995780 21.423855  
C 15.951308 15.190844 22.086145  
C 14.934291 15.837653 21.313311  
C 13.645857 15.850739 21.940620  
C 12.737047 15.030886 21.194492  
C 12.317562 13.850016 21.889145  
C 12.838105 12.689535 21.232796  
C 13.800036 11.960384 22.000784  
C 15.084387 12.043376 21.372604  
C 16.048159 12.790777 22.123432  
C 15.844385 15.193610 23.509054  
C 14.784636 15.942941 24.159481  
C 13.570843 15.845799 23.362825  
C 12.520338 15.102220 24.036850  
C 12.260076 13.870339 23.312693  
C 12.614958 12.682780 24.072147  
C 13.723848 12.004867 23.423534  
C 14.937881 12.021878 24.219847  
C 15.942295 12.824698 23.543901  
C 16.271210 14.037504 24.272068  
C 14.694201 15.944605 25.561033  
C 13.385469 15.924513 26.208015  
C 12.451499 15.110256 25.440468  
C 12.046103 13.905009 26.153021

C 12.543244 12.711802 25.473951  
C 13.546879 12.016273 26.267599  
C 14.848511 12.060180 25.621733  
C 15.819934 12.832329 26.392311  
C 16.169867 14.055133 25.674252  
C 15.695513 15.247352 26.354771  
C 13.305986 15.930194 27.607437  
C 12.279365 15.145823 28.274563  
C 11.974036 13.922020 27.552734  
C 12.359892 12.738178 28.319105  
C 13.467637 12.048060 27.673426  
C 14.685760 12.084414 28.461441  
C 15.733539 12.850748 27.787025  
C 16.016272 14.085668 28.515831  
C 15.601005 15.253227 27.760742  
C 14.527931 15.991778 28.412067  
C 12.190216 15.164426 29.684118  
C 11.777769 13.964257 30.391123  
C 12.280204 12.765924 29.717213  
C 13.309976 12.119567 30.510021  
C 14.604904 12.107183 29.864849  
C 15.609857 12.852122 30.631168  
C 15.929888 14.095414 29.920425  
C 15.409711 15.261614 30.598438  
C 14.437062 15.999071 29.810837  
C 13.120683 15.978147 30.450178  
C 11.693714 13.989862 31.797167

C 12.107753 12.832926 32.612492  
C 13.229043 12.149614 31.937468  
C 14.458574 12.148030 32.742455  
C 15.540791 12.857414 32.022781  
C 15.766814 14.097884 32.797863  
C 15.317819 15.266171 32.026203  
C 14.238974 16.014189 32.702866  
C 13.031024 15.986714 31.856270  
C 12.025774 15.192164 32.562794  
Cr 14.367422 16.251240 34.682701  
Cr 11.664679 15.375945 34.587708  
Cr 13.707692 14.048805 33.255741  
Cr 12.907222 16.226994 36.539146  
Cr 16.083771 14.149333 34.776279  
Cr 15.293369 15.542537 37.029163  
Cr 13.670064 14.008618 35.524216  
Cr 11.888478 12.541367 34.577286  
Cr 11.301949 13.824848 36.465851  
Cr 14.483476 11.756165 34.707066  
Cr 13.087682 14.322464 38.115128  
Cr 14.983192 13.088982 37.081665  
Cr 12.834736 11.862925 36.922169

05H60C13Mn

H 12.866961 12.640942 20.139511  
H 15.185762 11.989454 20.284739  
H 16.509768 13.999232 20.339897

|                                 |                                 |
|---------------------------------|---------------------------------|
| H 15.012701 15.879745 20.226210 | C 13.553563 11.998331 26.263258 |
| H 12.757499 15.043498 20.104431 | C 14.860499 12.063374 25.617329 |
| C 16.388205 14.010444 21.424377 | C 15.815069 12.850718 26.388783 |
| C 15.955105 15.202891 22.087433 | C 16.182562 14.067641 25.673136 |
| C 14.933926 15.841084 21.314001 | C 15.712770 15.267388 26.357447 |
| C 13.646473 15.846829 21.941826 | C 13.309090 15.920236 27.608458 |
| C 12.741939 15.024955 21.195526 | C 12.275647 15.139307 28.279261 |
| C 12.322428 13.845225 21.888706 | C 11.983438 13.909599 27.553104 |
| C 12.847517 12.687868 21.229721 | C 12.372143 12.725329 28.311846 |
| C 13.816051 11.966931 21.997522 | C 13.471715 12.019951 27.660078 |
| C 15.099817 12.057794 21.370554 | C 14.691948 12.084445 28.455917 |
| C 16.061682 12.804993 22.123373 | C 15.722300 12.870143 27.785984 |
| C 15.849449 15.205931 23.509216 | C 16.024240 14.096901 28.516781 |
| C 14.781896 15.942951 24.161787 | C 15.623448 15.276887 27.755709 |
| C 13.570483 15.840876 23.365768 | C 14.528296 15.986903 28.407978 |
| C 12.518862 15.098196 24.039062 | C 12.186962 15.156560 29.677994 |
| C 12.264705 13.864882 23.312824 | C 11.799145 13.938928 30.386206 |
| C 12.626048 12.680295 24.070423 | C 12.285151 12.737911 29.710344 |
| C 13.737387 12.007072 23.419626 | C 13.297703 12.038889 30.499300 |
| C 14.951519 12.029788 24.217812 | C 14.608509 12.094398 29.856514 |
| C 15.954199 12.837500 23.543922 | C 15.563424 12.887572 30.624628 |
| C 16.283157 14.050219 24.273682 | C 15.943976 14.108887 29.916294 |
| C 14.694562 15.946735 25.563885 | C 15.461758 15.310138 30.595251 |
| C 13.387970 15.915949 26.210407 | C 14.444921 16.004843 29.807827 |
| C 12.451166 15.104962 25.440931 | C 13.132822 15.961953 30.446815 |
| C 12.056007 13.895254 26.154123 | C 11.713866 13.955913 31.794044 |
| C 12.552137 12.704700 25.471497 | C 12.164852 12.813643 32.591251 |



C 13.212214 12.054779 31.907803  
C 14.407745 12.193241 32.734367  
C 15.476718 12.900936 32.033001  
C 15.695855 14.132113 32.790726  
C 15.373896 15.323608 32.003021  
C 14.251038 15.975085 32.684772  
C 13.046516 15.977164 31.855576  
C 12.062710 15.155925 32.559719  
Mn 14.260775 16.279253 34.630260  
Mn 11.658113 15.319230 34.481537  
Mn 13.674362 14.061212 33.361973  
Mn 12.648684 16.272457 36.864746  
Mn 15.947273 14.192780 34.755104  
Mn 15.093933 15.399808 36.852436  
Mn 13.531662 14.091417 35.692436  
Mn 11.741946 12.636342 34.515057  
Mn 11.408615 14.016934 36.625004  
Mn 14.399551 11.918588 34.698391  
Mn 13.372910 14.113584 38.176033  
Mn 15.322991 12.833534 36.968391  
Mn 12.857295 11.898031 36.845322

05H60C13Fe

H 12.866741 12.648074 20.137232  
H 15.184005 11.993667 20.280249  
H 16.510353 14.000409 20.338057  
H 15.012943 15.881150 20.226213

H 12.754265 15.049235 20.103827  
C 16.388605 14.010056 21.422602  
C 15.954659 15.201450 22.086290  
C 14.933888 15.841824 21.314072  
C 13.646670 15.848272 21.941601  
C 12.739306 15.029535 21.194927  
C 12.320851 13.848535 21.887623  
C 12.845834 12.691993 21.227602  
C 13.814539 11.970308 21.993429  
C 15.098713 12.058538 21.366383  
C 16.061047 12.804198 22.119915  
C 15.848653 15.202483 23.509050  
C 14.782741 15.939737 24.161402  
C 13.570997 15.841145 23.365633  
C 12.519247 15.099422 24.039003  
C 12.264544 13.866725 23.312338  
C 12.626724 12.682096 24.068449  
C 13.736554 12.009169 23.417038  
C 14.950067 12.028833 24.214970  
C 15.953776 12.835275 23.541050  
C 16.282679 14.046751 24.271534  
C 14.696186 15.941436 25.564751  
C 13.390599 15.914608 26.211721  
C 12.453561 15.104563 25.441717  
C 12.056814 13.895641 26.153673  
C 12.554870 12.707157 25.471382  
C 13.553914 11.999232 26.261990

C 14.859517 12.062016 25.615788  
C 15.816592 12.845407 26.387531  
C 16.181038 14.062885 25.672276  
C 15.713438 15.261986 26.356674  
C 13.313007 15.916333 27.611332  
C 12.276800 15.139213 28.280762  
C 11.987244 13.909525 27.554296  
C 12.373660 12.725370 28.311811  
C 13.473014 12.023213 27.661427  
C 14.692540 12.078865 28.456802  
C 15.721355 12.866347 27.786196  
C 16.024303 14.091867 28.516262  
C 15.621447 15.268866 27.757113  
C 14.532185 15.984708 28.409657  
C 12.192289 15.153359 29.681547  
C 11.804143 13.937291 30.388498  
C 12.291052 12.740608 29.713217  
C 13.299250 12.041630 30.504034  
C 14.607778 12.093117 29.858616  
C 15.565611 12.882687 30.625170  
C 15.938621 14.104161 29.917955  
C 15.459437 15.301634 30.599766  
C 14.447572 15.997379 29.811697  
C 13.135942 15.961590 30.450182  
C 11.721670 13.952291 31.795980  
C 12.134581 12.790209 32.603947  
C 13.215497 12.060897 31.913944

C 14.432773 12.143167 32.738419  
C 15.480058 12.897573 32.030075  
C 15.746895 14.125298 32.797405  
C 15.370099 15.311756 32.010250  
C 14.262854 16.001188 32.697247  
C 13.051804 15.971811 31.855791  
C 12.031766 15.173757 32.554249  
Fe 14.149255 16.110502 34.672035  
Fe 11.849767 15.243858 34.491310  
Fe 13.691505 14.052497 33.162525  
Fe 12.726456 16.047276 36.783134  
Fe 15.711094 14.119100 34.757816  
Fe 15.105494 15.389289 36.906845  
Fe 13.527471 14.087948 35.702354  
Fe 11.927367 12.779613 34.576187  
Fe 11.378756 14.035699 36.722755  
Fe 14.365203 12.102744 34.696907  
Fe 13.356844 14.124414 38.176647  
Fe 15.165308 12.954813 36.973980  
Fe 12.895311 12.082726 36.805870

05H60C13Co

H 12.841282 12.643541 20.158041  
H 15.154999 11.997596 20.300953  
H 16.497444 13.998158 20.353355  
H 15.020215 15.887094 20.245853  
H 12.767466 15.047894 20.127630

C 16.381216 14.009809 21.438425  
C 15.963575 15.205652 22.105957  
C 14.942761 15.847803 21.333683  
C 13.656938 15.847805 21.963409  
C 12.750074 15.030585 21.218832  
C 12.316207 13.856151 21.909508  
C 12.824781 12.691033 21.248173  
C 13.792315 11.966576 22.016338  
C 15.073812 12.061919 21.387554  
C 16.037292 12.807907 22.135689  
C 15.861856 15.206634 23.526863  
C 14.792909 15.942035 24.183952  
C 13.582623 15.838617 23.388847  
C 12.528133 15.101740 24.060888  
C 12.258531 13.872892 23.333565  
C 12.607701 12.682817 24.090200  
C 13.717648 12.007654 23.438368  
C 14.933576 12.035598 24.234652  
C 15.934144 12.839556 23.559692  
C 16.282284 14.043284 24.290743  
C 14.709613 15.943019 25.586170  
C 13.405980 15.902816 26.234694  
C 12.462627 15.104943 25.464329  
C 12.048772 13.899099 26.173920  
C 12.536798 12.705667 25.489988  
C 13.537714 11.994827 26.282906  
C 14.843543 12.068596 25.636459

C 15.797843 12.851740 26.407804  
C 16.184593 14.060188 25.692057  
C 15.735315 15.268856 26.378826  
C 13.330179 15.901720 27.636362  
C 12.288262 15.133276 28.302271  
C 11.978106 13.910450 27.571848  
C 12.353290 12.719416 28.331133  
C 13.455611 12.016917 27.679186  
C 14.676035 12.086962 28.476793  
C 15.702341 12.874144 27.809521  
C 16.029469 14.092095 28.538559  
C 15.647834 15.279702 27.774519  
C 14.548316 15.986213 28.430645  
C 12.204241 15.143115 29.702473  
C 11.790302 13.932819 30.408726  
C 12.269177 12.730655 29.730019  
C 13.277149 12.022593 30.520451  
C 14.589262 12.101245 29.877035  
C 15.525251 12.907484 30.643744  
C 15.944123 14.108658 29.939262  
C 15.499284 15.326612 30.622929  
C 14.464864 15.999695 29.831367  
C 13.160881 15.924937 30.471704  
C 11.705969 13.947908 31.813944  
C 12.138251 12.794245 32.614918  
C 13.193640 12.037723 31.923813  
C 14.401400 12.156399 32.762787

C 15.435480 12.924337 32.059242  
C 15.730612 14.141764 32.823029  
C 15.415138 15.340631 32.023109  
C 14.283687 15.985636 32.716583  
C 13.075737 15.935092 31.885151  
C 12.048691 15.154729 32.587822  
Co 14.203317 16.103737 34.649368  
Co 11.863039 15.231322 34.502098  
Co 13.690448 14.052408 33.201496  
Co 12.807944 16.075968 36.580490  
Co 15.712294 14.172149 34.761532  
Co 15.132163 15.398150 36.766380  
Co 13.542316 14.085320 35.604816  
Co 11.936269 12.762888 34.547134  
Co 11.383971 13.961152 36.546425  
Co 14.310070 12.101242 34.688068  
Co 13.399175 14.107052 37.821987  
Co 15.229787 12.967499 36.764156  
Co 12.844047 12.093838 36.658775

05H60C13Ni

H 12.867932 12.650930 20.159201  
H 15.175162 11.999988 20.300377  
H 16.494938 14.005086 20.354908  
H 15.014842 15.884389 20.248075  
H 12.769525 15.050739 20.125889  
C 16.383165 14.014690 21.440483

C 15.955572 15.206066 22.107536  
C 14.936817 15.848900 21.336018  
C 13.651469 15.855047 21.964569  
C 12.748725 15.033985 21.216848  
C 12.327549 13.855270 21.908846  
C 12.845927 12.695374 21.249397  
C 13.811695 11.971290 22.016413  
C 15.093549 12.062125 21.386808  
C 16.054440 12.810055 22.138308  
C 15.852491 15.205569 23.531096  
C 14.787431 15.943930 24.187208  
C 13.576435 15.847107 23.388737  
C 12.524302 15.104632 24.061098  
C 12.268827 13.873113 23.333647  
C 12.626282 12.686380 24.089907  
C 13.735472 12.011640 23.439146  
C 14.949731 12.032429 24.236736  
C 15.951288 12.839442 23.561161  
C 16.283922 14.048599 24.294428  
C 14.701182 15.945175 25.588470  
C 13.392785 15.918447 26.235558  
C 12.455043 15.110353 25.462095  
C 12.057220 13.899233 26.173059  
C 12.553759 12.709150 25.489937  
C 13.554585 11.999878 26.283123  
C 14.861772 12.062733 25.636600  
C 15.819700 12.845177 26.411081

C 16.186127 14.063035 25.695078  
C 15.718025 15.262348 26.381876  
C 13.312404 15.922193 27.631439  
C 12.275382 15.140491 28.299915  
C 11.983776 13.911552 27.570297  
C 12.372365 12.726452 28.329563  
C 13.472582 12.020676 27.679039  
C 14.693984 12.077386 28.476694  
C 15.727072 12.862954 27.807512  
C 16.025146 14.089960 28.540588  
C 15.626525 15.270660 27.779034  
C 14.532634 15.985255 28.431782  
C 12.186725 15.155119 29.698229  
C 11.805533 13.937067 30.406851  
C 12.285784 12.738127 29.727024  
C 13.297016 12.039034 30.517151  
C 14.608562 12.086701 29.875565  
C 15.558393 12.883171 30.649200  
C 15.940820 14.102254 29.939337  
C 15.455144 15.299821 30.618681  
C 14.446050 16.001879 29.830368  
C 13.133587 15.958339 30.471611  
C 11.714346 13.950398 31.815018  
C 12.146179 12.794631 32.611794  
C 13.207982 12.046667 31.923887  
C 14.414780 12.155071 32.755077  
C 15.476048 12.892365 32.056458

C 15.714490 14.126130 32.818432  
C 15.370781 15.313695 32.025833  
C 14.255260 15.980094 32.709312  
C 13.044613 15.977642 31.876495  
C 12.044491 15.160084 32.580208  
Ni 14.162254 16.110638 34.614994  
Ni 11.780713 15.261527 34.467621  
Ni 13.678058 14.047630 33.245720  
Ni 12.749635 16.061741 36.579082  
Ni 15.709583 14.153079 34.737377  
Ni 15.068857 15.375998 36.751251  
Ni 13.512236 14.061147 35.592224  
Ni 11.923487 12.730168 34.510410  
Ni 11.430227 14.033484 36.558090  
Ni 14.322624 12.018598 34.654236  
Ni 13.392490 14.125535 37.948483  
Ni 15.208317 12.931627 36.765835  
Ni 12.945382 12.130653 36.688568

05H60C13Cu

H 12.948115 12.696109 20.136452  
H 15.229502 11.868526 20.292679  
H 16.419640 13.971233 20.332041  
H 14.985182 15.906844 20.233459  
H 12.760091 15.104928 20.113966  
C 16.344099 13.983875 21.421024  
C 15.910974 15.176644 22.079042

C 14.913691 15.867791 21.322121  
C 13.628722 15.918691 21.960043  
C 12.741850 15.076557 21.205183  
C 12.375281 13.871578 21.883121  
C 12.890681 12.711318 21.226551  
C 13.827174 11.961596 21.988518  
C 15.136339 11.947835 21.376801  
C 16.057228 12.779747 22.119125  
C 15.820609 15.191969 23.507996  
C 14.781711 15.953206 24.165276  
C 13.555508 15.907475 23.373669  
C 12.522115 15.118157 24.040848  
C 12.301105 13.887879 23.312494  
C 12.656515 12.704439 24.063560  
C 13.744111 12.002618 23.412704  
C 14.959420 11.992993 24.218180  
C 15.951440 12.818458 23.540316  
C 16.247646 14.038573 24.266272  
C 14.698094 15.949205 25.567503  
C 13.390129 15.924664 26.215279  
C 12.453739 15.113855 25.442047  
C 12.070151 13.897688 26.151039  
C 12.569831 12.713593 25.468830  
C 13.553745 11.990704 26.258732  
C 14.866231 12.031100 25.613409  
C 15.812099 12.835901 26.385536  
C 16.164612 14.052988 25.671715

C 15.707363 15.252588 26.357088  
C 13.311600 15.923227 27.611586  
C 12.277045 15.137451 28.278702  
C 11.984222 13.908377 27.549707  
C 12.373280 12.723114 28.305689  
C 13.468184 12.009106 27.656540  
C 14.689138 12.067236 28.454662  
C 15.720428 12.853995 27.783802  
C 16.017405 14.081675 28.513004  
C 15.626493 15.266176 27.755810  
C 14.534044 15.981666 28.409201  
C 12.187342 15.151443 29.675200  
C 11.812480 13.932929 30.384872  
C 12.280647 12.730856 29.703939  
C 13.294138 12.044824 30.499428  
C 14.602996 12.078665 29.853270  
C 15.543231 12.883969 30.624390  
C 15.941370 14.093636 29.912743  
C 15.454195 15.287584 30.595669  
C 14.452164 15.998457 29.806639  
C 13.143414 15.938187 30.449413  
C 11.719418 13.945926 31.791340  
C 12.131407 12.783177 32.585106  
C 13.207559 12.053576 31.908043  
C 14.416638 12.143379 32.731125  
C 15.463408 12.893685 32.032475  
C 15.730764 14.118491 32.788357

C 15.374615 15.304332 32.002533  
C 14.268409 15.994949 32.681519  
C 13.054187 15.956314 31.854753  
C 12.040826 15.156982 32.550941  
Cu 14.181968 16.204088 34.635246  
Cu 11.788295 15.349397 34.494225  
Cu 13.671831 14.055587 33.415264  
Cu 12.697433 16.115673 36.734829  
Cu 15.804933 14.222801 34.753838  
Cu 15.171827 15.395899 36.894821  
Cu 13.525411 14.121781 35.808506  
Cu 11.831887 12.746838 34.530174  
Cu 11.334709 13.983998 36.665321  
Cu 14.385881 12.009651 34.695290  
Cu 13.376505 14.150905 38.224659  
Cu 15.210468 12.896616 36.907799  
Cu 12.903066 12.082053 36.766953

05H60C13Zn

H 12.938162 12.758565 20.095757  
H 15.204750 11.964729 20.264858  
H 16.515156 13.906561 20.344202  
H 14.982311 15.750873 20.218239  
H 12.609360 15.186161 20.088484  
C 16.397196 13.920012 21.429653  
C 15.921669 15.100345 22.076588  
C 14.914201 15.767788 21.307718

C 13.641602 15.840067 21.925209  
C 12.604195 15.144569 21.178982  
C 12.311587 13.885980 21.843773  
C 12.857300 12.756886 21.184444  
C 13.808718 12.008546 21.949888  
C 15.106473 12.015833 21.351055  
C 16.104385 12.700602 22.130283  
C 15.835050 15.106371 23.504917  
C 14.780193 15.853006 24.150553  
C 13.571767 15.824844 23.350805  
C 12.485488 15.112992 24.013783  
C 12.248308 13.880556 23.270622  
C 12.621414 12.699386 24.023037  
C 13.717977 12.010585 23.377190  
C 14.916497 11.965797 24.186642  
C 15.992097 12.719133 23.537569  
C 16.269196 13.956402 24.265778  
C 14.688572 15.869086 25.554541  
C 13.381971 15.873472 26.190321  
C 12.415383 15.103634 25.409948  
C 12.019632 13.884566 26.113995  
C 12.515903 12.701177 25.427345  
C 13.491626 11.967787 26.217854  
C 14.806420 11.986464 25.584360  
C 15.772271 12.749944 26.374548  
C 16.154957 13.968956 25.666122  
C 15.684107 15.165865 26.350216

C 13.295302 15.884729 27.588490  
C 12.258408 15.106155 28.250549  
C 11.937203 13.891149 27.511948  
C 12.313489 12.698183 28.264193  
C 13.394126 11.966040 27.614981  
C 14.609153 11.995914 28.424820  
C 15.665037 12.765735 27.768452  
C 15.950903 13.991281 28.505863  
C 15.595638 15.182740 27.748661  
C 14.517457 15.931631 28.393675  
C 12.171042 15.113830 29.653313  
C 11.798121 13.900585 30.362541  
C 12.212012 12.691974 29.662682  
C 13.201471 11.977308 30.450821  
C 14.509750 11.992886 29.821743  
C 15.427721 12.800142 30.614929  
C 15.846730 14.000296 29.908129  
C 15.375630 15.192999 30.589514  
C 14.428843 15.965340 29.785032  
C 13.117630 15.894965 30.427963  
C 11.716707 13.906267 31.776730  
C 12.072182 12.726349 32.530663  
C 13.099958 11.967234 31.870674  
C 14.276988 12.073639 32.696472  
C 15.324247 12.813986 32.029427  
C 15.613677 14.036303 32.758308  
C 15.280121 15.208431 32.000797

C 14.242647 16.028749 32.674526  
C 13.023477 15.929737 31.839729  
C 12.043176 15.117566 32.519146  
Zn 14.996516 17.341070 34.124084  
Zn 11.113081 15.504578 34.341293  
Zn 13.540360 14.878600 34.297485  
Zn 12.373330 16.426022 36.493607  
Zn 16.016724 14.191604 34.722137  
Zn 14.939809 15.978099 36.353065  
Zn 15.177498 13.368765 36.862106  
Zn 11.626042 12.751991 34.489273  
Zn 11.191075 14.167381 36.462257  
Zn 14.262714 12.190916 34.707352  
Zn 13.337477 14.664050 37.903496  
Zn 16.971592 12.322762 38.343189  
Zn 12.849040 12.354480 36.896599

05H60C13Y

H 13.016759 12.062308 20.605509  
H 15.424550 11.927381 20.523912  
H 16.150139 14.198353 20.337112  
H 14.200559 15.652956 20.313095  
H 12.190710 14.341784 20.473530  
C 16.140955 14.259714 21.426975  
C 15.458463 15.336477 22.078264  
C 14.242596 15.673107 21.403913  
C 13.050813 15.460847 22.168739



C 12.308633 14.389030 21.557207  
C 12.320872 13.184228 22.344202  
C 13.076445 12.166912 21.690847  
C 14.255647 11.745559 22.377220  
C 15.425640 12.060699 21.606960  
C 16.248564 13.068969 22.216297  
C 15.500846 15.419735 23.505571  
C 14.360660 15.933222 24.234190  
C 13.115767 15.535092 23.581091  
C 12.352724 14.594305 24.403801  
C 12.392155 13.287616 23.763380  
C 13.143661 12.308456 24.530638  
C 14.312950 11.870642 23.797977  
C 15.564468 12.210622 24.456747  
C 16.280634 13.178503 23.628160  
C 16.318546 14.494362 24.262032  
C 14.411820 16.015383 25.633858  
C 13.202990 15.754173 26.418877  
C 12.416527 14.683693 25.794230  
C 12.460277 13.465049 26.606861  
C 13.202751 12.414186 25.933235  
C 14.418725 12.044090 26.640625  
C 15.612544 12.325404 25.849957  
C 16.431093 13.374574 26.479816  
C 16.363169 14.589942 25.659573  
C 15.622259 15.637113 26.339231  
C 13.241961 15.852626 27.805510

C 12.485254 14.890878 28.619442  
C 12.495451 13.560875 28.007547  
C 13.302007 12.603950 28.769901  
C 14.472897 12.147829 28.039875  
C 15.723389 12.532842 28.691071  
C 16.491282 13.472841 27.866947  
C 16.468365 14.792945 28.520731  
C 15.665325 15.723093 27.749063  
C 14.505510 16.193092 28.467281  
C 12.468513 15.032904 30.017981  
C 12.545973 13.754604 30.810781  
C 13.350529 12.675044 30.180853  
C 14.607806 12.366111 30.869373  
C 15.803349 12.611647 30.085100  
C 16.640112 13.646174 30.716782  
C 16.508287 14.883562 29.928785  
C 15.680881 15.839439 30.623959  
C 14.545671 16.287697 29.869619  
C 13.302215 16.114632 30.601809  
C 12.669566 13.913968 32.242321  
C 13.374395 12.838152 33.013145  
C 14.669780 12.468588 32.272640  
C 15.944024 12.711379 32.969524  
C 16.711424 13.734421 32.100174  
C 16.613342 15.084620 32.830185  
C 15.692237 15.942471 32.099979  
C 14.544978 16.582895 32.752491

C 13.320998 16.278290 31.969259  
C 12.450784 15.275292 32.771019  
Y 12.476713 17.146645 33.982254  
Y 10.360081 14.692207 31.506138  
Y 14.600936 14.636373 34.126686  
Y 8.715619 15.710298 34.865990  
Y 17.750698 13.581807 34.132095  
Y 11.248666 15.842989 37.180862  
Y 11.436308 13.865258 34.558781  
Y 11.657166 11.636861 31.859993  
Y 8.582034 12.457035 33.691437  
Y 14.487712 11.450214 34.440170  
Y 9.408105 13.078744 36.962181  
Y 12.888863 12.814028 37.399006  
Y 11.094882 10.610204 35.387619

05H60C13Zr

H 12.766684 12.280605 20.415501  
H 15.067544 11.567516 20.551411  
H 16.314182 13.598302 20.373264  
H 14.804431 15.457127 20.131676  
H 12.541559 14.674418 20.153913  
C 16.240919 13.713294 21.456371  
C 15.803833 14.955293 22.012981  
C 14.764909 15.536118 21.219776  
C 13.502210 15.643194 21.882511  
C 12.569031 14.753494 21.241899  
C 12.238271 13.617144 22.058813

C 12.760179 12.414157 21.499063  
C 13.740880 11.750650 22.296803  
C 15.011091 11.744699 21.626431  
C 15.989002 12.571598 22.279964  
C 15.750166 15.097155 23.436014  
C 14.715742 15.905210 24.044519  
C 13.472681 15.775901 23.294554  
C 12.448087 15.082989 24.074358  
C 12.226932 13.773542 23.478222  
C 12.641762 12.678432 24.329981  
C 13.713234 11.921297 23.711842  
C 14.953724 11.982887 24.471062  
C 15.929849 12.735109 23.689083  
C 16.231380 14.028322 24.290443  
C 14.671549 16.046261 25.440985  
C 13.384218 16.117111 26.134295  
C 12.425014 15.225236 25.462681  
C 12.122765 14.071294 26.304335  
C 12.610170 12.829894 25.728537  
C 13.618359 12.167148 26.550295  
C 14.908258 12.140762 25.855921  
C 15.869718 13.016487 26.530052  
C 16.179644 14.174582 25.684099  
C 15.699941 15.426507 26.258461  
C 13.350805 16.256908 27.521090  
C 12.350033 15.515343 28.306955  
C 12.088321 14.218174 27.694628

C 12.522389 13.113124 28.532476  
C 13.580813 12.311402 27.935715  
C 14.820308 12.440454 28.719290  
C 15.826981 13.162547 27.914392  
C 16.120340 14.473030 28.491428  
C 15.661513 15.574455 27.649277  
C 14.595613 16.326641 28.280123  
C 12.291286 15.652689 29.694342  
C 11.971269 14.467581 30.487314  
C 12.449760 13.229621 29.913319  
C 13.411479 12.469219 30.766434  
C 14.800292 12.525190 30.122734  
C 15.856447 13.435990 30.718443  
C 16.113522 14.619256 29.861366  
C 15.617430 15.839783 30.473545  
C 14.569166 16.463085 29.689363  
C 13.278358 16.504004 30.394018  
C 11.884134 14.552447 31.905148  
C 12.052616 13.243618 32.693790  
C 13.005035 12.177838 32.117290  
C 15.958081 12.485072 32.991005  
C 16.321983 13.549253 32.070667  
C 16.379377 14.931095 32.691078  
C 15.673634 15.967220 31.910818  
C 14.541697 16.579632 32.583740  
C 13.296450 16.564474 31.797657  
C 12.306137 15.778859 32.621803

Zr 13.460628 16.308582 34.554928  
Zr 10.862231 14.604565 34.029686  
Zr 14.132954 14.227718 32.373341  
Zr 11.784761 15.281660 36.810577  
Zr 16.217953 13.877559 34.615921  
Zr 14.717408 14.842160 37.202785  
Zr 13.238897 13.338358 35.207714  
Zr 11.292057 11.464533 33.715748  
Zr 10.559017 12.641616 36.306725  
Zr 14.536995 11.144594 33.647446  
Zr 12.853519 12.818756 38.127682  
Zr 15.255427 11.936087 36.745750  
Zr 12.704964 10.612074 36.142334

05H60C13Nb

H 12.845320 12.635766 20.070972  
H 15.168935 11.988132 20.211908  
H 16.511444 14.003907 20.269506  
H 15.028538 15.908581 20.165398  
H 12.764551 15.056801 20.038189  
C 16.385101 14.011081 21.353621  
C 15.968238 15.207245 22.021912  
C 14.945970 15.852328 21.252289  
C 13.655725 15.854431 21.878515  
C 12.752083 15.033059 21.129339  
C 12.319982 13.855109 21.820246  
C 12.834452 12.690487 21.160917

C 13.800956 11.962578 21.929417  
C 15.083700 12.060190 21.297646  
C 16.050499 12.804905 22.048399  
C 15.861181 15.205024 23.441523  
C 14.793007 15.944576 24.094654  
C 13.579676 15.845243 23.301155  
C 12.526953 15.100933 23.972946  
C 12.265018 13.871208 23.244171  
C 12.618803 12.681855 24.001451  
C 13.727665 12.002989 23.350286  
C 14.945923 12.026728 24.143110  
C 15.947105 12.834579 23.469713  
C 16.285194 14.042215 24.202732  
C 14.705471 15.940120 25.497725  
C 13.400956 15.906630 26.148884  
C 12.461691 15.102986 25.378466  
C 12.062499 13.895815 26.090771  
C 12.552120 12.707110 25.405434  
C 13.552351 11.995692 26.192310  
C 14.856078 12.058489 25.545301  
C 15.809662 12.843105 26.318047  
C 16.183033 14.056499 25.605654  
C 15.722221 15.257378 26.289114  
C 13.325964 15.907278 27.553429  
C 12.299987 15.126204 28.228420  
C 11.996005 13.906760 27.495121  
C 12.385572 12.725616 28.252174

C 13.474850 12.017847 27.595646  
C 14.693220 12.075207 28.392233  
C 15.716619 12.862170 27.721378  
C 16.023445 14.082623 28.448523  
C 15.633672 15.263533 27.691694  
C 14.544444 15.972258 28.347761  
C 12.211411 15.141144 29.633087  
C 11.806917 13.929953 30.339918  
C 12.300053 12.736234 29.656988  
C 13.302435 12.031165 30.443607  
C 14.611528 12.084606 29.795353  
C 15.554072 12.885841 30.561459  
C 15.946815 14.095366 29.852591  
C 15.477977 15.298256 30.538385  
C 14.462208 15.987672 29.752316  
C 13.151317 15.952442 30.397919  
C 11.693547 13.942572 31.744865  
C 12.048844 12.698278 32.519768  
C 13.212801 12.018028 31.853643  
C 14.479269 12.016663 32.668072  
C 15.499780 12.878969 31.978992  
C 15.885485 14.122867 32.728683  
C 15.420180 15.326385 31.949249  
C 14.326168 16.113579 32.617352  
C 13.059561 15.993543 31.803574  
C 11.949203 15.232910 32.481709  
Nb 14.187100 16.403917 34.715508

Nb 11.591035 15.421546 34.553291  
Nb 13.713706 14.039760 33.117035  
Nb 12.732723 16.278889 37.475945  
Nb 15.946311 14.212582 34.863846  
Nb 15.288691 15.466821 37.443108  
Nb 13.417975 14.162497 35.999451  
Nb 11.674211 12.641488 34.611420  
Nb 11.161350 13.930388 37.405327  
Nb 14.366925 11.848583 34.798023  
Nb 13.231592 14.206707 38.900040  
Nb 15.336751 12.836931 37.393051  
Nb 12.886183 11.880154 37.338326

05H60C13Mo

H 12.841438 12.695679 20.095346  
H 15.153481 12.012592 20.225111  
H 16.506014 14.008817 20.298187  
H 15.025389 15.916396 20.209709  
H 12.753818 15.107919 20.085566  
C 16.382256 14.009131 21.382645  
C 15.964443 15.199741 22.059338  
C 14.947552 15.860921 21.296738  
C 13.661860 15.877851 21.929253  
C 12.744306 15.075571 21.176451  
C 12.316536 13.889908 21.858051  
C 12.826713 12.733232 21.186117  
C 13.787395 11.989943 21.944485

C 15.071564 12.071070 21.311815  
C 16.045656 12.798944 22.069788  
C 15.862897 15.187208 23.481480  
C 14.806682 15.931053 24.143471  
C 13.589948 15.855196 23.352144  
C 12.533078 15.114937 24.020508  
C 12.263329 13.892844 23.283352  
C 12.613667 12.696402 24.029804  
C 13.714790 12.015725 23.367741  
C 14.932272 12.016550 24.160494  
C 15.942487 12.817579 23.491282  
C 16.286053 14.018898 24.233557  
C 14.725296 15.917959 25.546698  
C 13.419643 15.904593 26.195372  
C 12.473860 15.107310 25.424196  
C 12.072868 13.898228 26.129162  
C 12.549713 12.709918 25.434298  
C 13.543615 11.981419 26.212902  
C 14.847020 12.036169 25.563402  
C 15.813509 12.803133 26.340767  
C 16.188189 14.022379 25.635923  
C 15.733224 15.218882 26.331602  
C 13.343698 15.899618 27.595114  
C 12.307861 15.125285 28.264132  
C 12.009963 13.902890 27.533504  
C 12.385422 12.710190 28.278486  
C 13.468521 11.995046 27.614552

C 14.689372 12.031596 28.407236  
C 15.721840 12.813313 27.742517  
C 16.030766 14.028730 28.483826  
C 15.638857 15.213642 27.734909  
C 14.562278 15.940569 28.390816  
C 12.226224 15.131330 29.667131  
C 11.842663 13.915228 30.362680  
C 12.312001 12.716668 29.682329  
C 13.308832 11.987548 30.464388  
C 14.607840 12.033443 29.813114  
C 15.557869 12.808754 30.590473  
C 15.942389 14.030933 29.887156  
C 15.474952 15.229424 30.568876  
C 14.477818 15.945883 29.794693  
C 13.169911 15.930608 30.448109  
C 11.738746 13.925396 31.772148  
C 12.096093 12.675795 32.530857  
C 13.226332 11.984425 31.872816  
C 14.448099 12.011092 32.745056  
C 15.481272 12.806105 32.000984  
C 15.845995 14.031208 32.743946  
C 15.405128 15.251930 31.979511  
C 14.342016 16.043322 32.683220  
C 13.076442 15.960199 31.857285  
C 11.972909 15.187304 32.548912  
Mo 14.162251 16.242981 34.812904  
Mo 11.760561 15.369756 34.677521

Mo 13.698268 14.029557 33.155235  
Mo 12.637712 16.266743 37.422405  
Mo 15.967312 14.429992 34.778816  
Mo 15.082998 15.614600 37.309776  
Mo 13.558493 13.983860 35.914284  
Mo 11.551960 12.825804 34.529404  
Mo 11.211515 14.200521 37.093468  
Mo 14.358596 11.929081 34.904335  
Mo 13.302904 14.285172 38.482971  
Mo 15.893617 13.259650 36.780449  
Mo 12.161150 11.900713 36.572906

05H60C13Tc

H 12.887389 12.641891 20.116459  
H 15.217394 12.022892 20.267345  
H 16.532774 14.048926 20.337168  
H 15.019879 15.914183 20.222425  
H 12.769113 15.049039 20.086075  
C 16.401793 14.053880 21.420612  
C 15.959805 15.240988 22.087261  
C 14.933773 15.867228 21.309328  
C 13.643421 15.854366 21.930418  
C 12.749398 15.026764 21.177061  
C 12.333295 13.843557 21.866333  
C 12.868400 12.690647 21.206633  
C 13.842583 11.977709 21.976534  
C 15.126998 12.088198 21.352949

C 16.079683 12.841949 22.112350  
C 15.845879 15.235106 23.508209  
C 14.767340 15.959316 24.156719  
C 13.561709 15.844934 23.354200  
C 12.514730 15.090637 24.019320  
C 12.271000 13.859729 23.289968  
C 12.634651 12.674024 24.046555  
C 13.757361 12.015171 23.398182  
C 14.967592 12.051412 24.200481  
C 15.968924 12.866133 23.532654  
C 16.285923 14.079094 24.268200  
C 14.669238 15.953726 25.559042  
C 13.358236 15.915578 26.198746  
C 12.437958 15.093022 25.423090  
C 12.048025 13.881267 26.129812  
C 12.557265 12.696589 25.447731  
C 13.564539 12.002318 26.240891  
C 14.871443 12.078146 25.601679  
C 15.824339 12.862062 26.378380  
C 16.176361 14.088358 25.668119  
C 15.682682 15.275128 26.353228  
C 13.270620 15.913703 27.597878  
C 12.244842 15.118256 28.258455  
C 11.970682 13.891921 27.531542  
C 12.362081 12.708429 28.288790  
C 13.477350 12.024929 27.642054  
C 14.691181 12.090114 28.439463

C 15.724030 12.876108 27.775620  
C 16.003450 14.103861 28.512856  
C 15.579303 15.272801 27.757071  
C 14.485512 15.979315 28.404659  
C 12.156277 15.128104 29.663786  
C 11.785851 13.914639 30.370350  
C 12.277472 12.722102 29.688089  
C 13.292904 12.033912 30.476742  
C 14.600014 12.100941 29.845230  
C 15.560765 12.875706 30.624300  
C 15.909767 14.108084 29.915302  
C 15.386741 15.277321 30.595001  
C 14.391856 15.982130 29.807405  
C 13.072675 15.950271 30.438198  
C 11.680523 13.929717 31.780760  
C 12.050762 12.721426 32.568855  
C 13.199385 12.029929 31.885653  
C 14.437539 12.070815 32.723186  
C 15.483330 12.873640 32.027603  
C 15.778751 14.116529 32.816730  
C 15.301236 15.292526 32.016762  
C 14.201114 16.073065 32.673042  
C 12.971200 15.972830 31.838684  
C 11.928867 15.179348 32.562027  
Tc 14.237747 16.329060 34.722618  
Tc 11.689978 15.295324 34.662117  
Tc 13.661280 14.033343 33.151951

Tc 12.842261 16.597721 36.528572  
Tc 15.894156 14.150711 34.925659  
Tc 15.281873 15.628323 36.980141  
Tc 13.530846 14.232304 35.856907  
Tc 11.922804 12.465496 34.622688  
Tc 11.189117 13.566640 36.591335  
Tc 14.209015 11.929731 34.796379  
Tc 13.850223 14.006494 38.251930  
Tc 15.427084 12.703692 36.823750  
Tc 12.856646 12.044725 37.315704

05H60C13Ru

H 12.859262 12.662016 20.122921  
H 15.172431 11.981664 20.263794  
H 16.504637 13.982510 20.321449  
H 15.011780 15.878720 20.213408  
H 12.742206 15.070693 20.091049  
C 16.381424 13.991957 21.405760  
C 15.950045 15.183662 22.070448  
C 14.933300 15.833482 21.300957  
C 13.647657 15.855891 21.931814  
C 12.734431 15.044525 21.181980  
C 12.316467 13.861454 21.874516  
C 12.840841 12.706488 21.213339  
C 13.802184 11.973962 21.978327  
C 15.087486 12.050119 21.349634  
C 16.058365 12.784531 22.105150

C 15.847558 15.183593 23.493214  
C 14.787791 15.928483 24.147734  
C 13.572805 15.845270 23.353825  
C 12.516235 15.107517 24.026609  
C 12.259856 13.876174 23.298571  
C 12.619177 12.688625 24.054863  
C 13.725705 12.011045 23.401407  
C 14.940296 12.017507 24.198933  
C 15.953142 12.814861 23.524158  
C 16.283562 14.028638 24.254850  
C 14.700933 15.931688 25.548428  
C 13.392083 15.920578 26.195700  
C 12.449768 15.112994 25.427481  
C 12.053386 13.903749 26.140163  
C 12.547634 12.712757 25.457428  
C 13.547824 12.005406 26.247549  
C 14.852225 12.050615 25.599062  
C 15.820812 12.825508 26.370905  
C 16.184254 14.045040 25.654530  
C 15.708683 15.239742 26.338285  
C 13.312442 15.928700 27.591768  
C 12.275620 15.150928 28.263708  
C 11.982301 13.920716 27.539915  
C 12.373964 12.739216 28.299736  
C 13.470152 12.031403 27.649031  
C 14.691551 12.074718 28.441786  
C 15.732887 12.845296 27.766819



C 16.026907 14.075045 28.498449  
C 15.616899 15.248086 27.740519  
C 14.535120 15.975618 28.389847  
C 12.190554 15.167980 29.664974  
C 11.808661 13.957065 30.376041  
C 12.293788 12.760248 29.699362  
C 13.305779 12.073960 30.488232  
C 14.609083 12.093397 29.844841  
C 15.583072 12.862594 30.616777  
C 15.941402 14.087610 29.899668  
C 15.436249 15.269080 30.573519  
C 14.447995 15.988294 29.789671  
C 13.134768 15.976234 30.432806  
C 11.699902 13.975186 31.783770  
C 12.094601 12.778078 32.593506  
C 13.215273 12.069373 31.901423  
C 14.448235 12.102712 32.737503  
C 15.522013 12.861672 32.020203  
C 15.797474 14.114682 32.794823  
C 15.368029 15.296477 31.991005  
C 14.279839 16.048409 32.680744  
C 13.041175 16.016712 31.835070  
C 11.999577 15.218541 32.552376  
Ru 14.215956 16.242178 34.726494  
Ru 11.735687 15.335078 34.596340  
Ru 13.694533 14.059076 33.163143  
Ru 12.701952 16.233746 36.834316

Ru 15.846003 14.157815 34.852425  
Ru 15.246437 15.501502 36.993767  
Ru 13.530667 14.091769 35.863434  
Ru 11.829903 12.690014 34.625809  
Ru 11.209530 14.014381 36.772213  
Ru 14.371184 11.964124 34.794216  
Ru 13.389980 14.118657 38.237022  
Ru 15.347072 12.841367 37.029362  
Ru 12.839542 11.930799 36.895336

05H60C13Rh

H 12.854787 12.662213 20.124712  
H 15.162747 11.990287 20.266256  
H 16.494465 13.985279 20.322691  
H 15.017271 15.879336 20.215843  
H 12.757839 15.064621 20.096209  
C 16.378965 13.996318 21.407948  
C 15.957318 15.190270 22.073921  
C 14.940882 15.839356 21.303736  
C 13.655541 15.853416 21.935257  
C 12.743638 15.042539 21.187281  
C 12.319538 13.863208 21.878042  
C 12.834134 12.704121 21.215084  
C 13.795904 11.972625 21.981354  
C 15.079647 12.053570 21.352623  
C 16.045795 12.792986 22.106640  
C 15.856185 15.191748 23.496019

C 14.794779 15.936210 24.152514  
C 13.580475 15.845121 23.358599  
C 12.524857 15.107609 24.032457  
C 12.262003 13.878133 23.302729  
C 12.614707 12.689093 24.059063  
C 13.719596 12.009227 23.404160  
C 14.934963 12.022081 24.203299  
C 15.941389 12.823217 23.527914  
C 16.281612 14.031670 24.259184  
C 14.711229 15.940611 25.551685  
C 13.402439 15.916469 26.200823  
C 12.456676 15.112931 25.431656  
C 12.052903 13.903431 26.144148  
C 12.540152 12.709090 25.458786  
C 13.540292 11.996078 26.250395  
C 14.847807 12.052282 25.601471  
C 15.809606 12.833587 26.374220  
C 16.187338 14.048558 25.657125  
C 15.727550 15.252684 26.344219  
C 13.323276 15.923385 27.594376  
C 12.284207 15.144855 28.267262  
C 11.979273 13.916591 27.538990  
C 12.364519 12.729101 28.298716  
C 13.460198 12.015224 27.644690  
C 14.683290 12.073299 28.443121  
C 15.720510 12.852375 27.768517  
C 16.028843 14.078940 28.500595

C 15.640129 15.264349 27.738617  
C 14.546373 15.981644 28.392765  
C 12.191784 15.163764 29.661062  
C 11.797391 13.946052 30.370396  
C 12.274965 12.739809 29.693176  
C 13.286646 12.034781 30.483562  
C 14.601803 12.081456 29.839359  
C 15.561844 12.875190 30.607685  
C 15.953100 14.093992 29.896521  
C 15.477378 15.300938 30.574675  
C 14.462996 16.003887 29.787176  
C 13.146797 15.966228 30.427929  
C 11.686966 13.962779 31.770962  
C 12.133271 12.799249 32.573780  
C 13.196032 12.027184 31.885424  
C 14.416885 12.149388 32.717289  
C 15.498857 12.876382 32.011684  
C 15.742908 14.124635 32.773365  
C 15.411529 15.330976 31.977552  
C 14.278093 15.998370 32.662090  
C 13.052660 16.005991 31.828093  
C 12.047436 15.178674 32.537827  
Rh 14.245927 16.324806 34.678455  
Rh 11.665249 15.381733 34.533844  
Rh 13.684608 14.058359 33.306255  
Rh 12.691624 16.235184 36.832859  
Rh 15.935971 14.159326 34.807156

Rh 15.250313 15.500638 36.998596  
Rh 13.529188 14.091194 35.867840  
Rh 11.760796 12.634306 34.575100  
Rh 11.202263 14.024193 36.770519  
Rh 14.401731 11.879115 34.743126  
Rh 13.373400 14.122645 38.409863  
Rh 15.342899 12.836275 37.036331  
Rh 12.841045 11.922763 36.894753

05H60C13Pd

H 12.858496 12.660198 20.115929  
H 15.164750 11.994270 20.257694  
H 16.494987 13.984108 20.314777  
H 15.018206 15.874056 20.205778  
H 12.762813 15.057146 20.086491  
C 16.380535 13.995444 21.400068  
C 15.958784 15.189196 22.065084  
C 14.941723 15.836402 21.293703  
C 13.656824 15.849445 21.925228  
C 12.745956 15.037258 21.177530  
C 12.321440 13.859548 21.869764  
C 12.836140 12.701095 21.206261  
C 13.798604 11.971814 21.972858  
C 15.081844 12.054978 21.344131  
C 16.047699 12.792686 22.099392  
C 15.856680 15.191325 23.487608  
C 14.795085 15.935110 24.143822

C 13.582258 15.842418 23.349651  
C 12.527480 15.104874 24.023125  
C 12.264390 13.875830 23.294598  
C 12.616634 12.687608 24.051613  
C 13.721800 12.008588 23.396389  
C 14.935965 12.022550 24.195915  
C 15.942432 12.823621 23.521299  
C 16.281303 14.032487 24.251905  
C 14.709935 15.940060 25.543121  
C 13.401358 15.914270 26.192141  
C 12.457600 15.111047 25.422600  
C 12.054684 13.902597 26.135950  
C 12.542123 12.708482 25.451303  
C 13.541575 11.996099 26.243019  
C 14.848372 12.052106 25.594482  
C 15.809211 12.834503 26.366407  
C 16.185877 14.049330 25.650286  
C 15.724955 15.252706 26.336155  
C 13.320865 15.922458 27.586100  
C 12.284914 15.142271 28.259266  
C 11.978556 13.915433 27.530619  
C 12.365433 12.729158 28.290308  
C 13.460372 12.014546 27.637430  
C 14.682626 12.076773 28.435356  
C 15.720477 12.853035 27.760933  
C 16.024771 14.079694 28.491711  
C 15.638211 15.265127 27.730661

C 14.542885 15.979092 28.383696  
C 12.191463 15.162625 29.654531  
C 11.807982 13.945423 30.365633  
C 12.276255 12.739748 29.685915  
C 13.291212 12.046203 30.477514  
C 14.602751 12.083839 29.833031  
C 15.554646 12.882700 30.602873  
C 15.951955 14.095459 29.888939  
C 15.468508 15.296372 30.566629  
C 14.461143 16.004236 29.779356  
C 13.149370 15.956285 30.423111  
C 11.692648 13.962681 31.770559  
C 12.133191 12.798283 32.561821  
C 13.198973 12.035342 31.883770  
C 14.418508 12.149590 32.704067  
C 15.496208 12.881507 32.011864  
C 15.745755 14.128232 32.759926  
C 15.406732 15.329891 31.973003  
C 14.279362 16.002890 32.648746  
C 13.053401 16.001987 31.828363  
C 12.046690 15.179084 32.525780  
Pd 14.326546 16.417118 34.621922  
Pd 11.566406 15.403126 34.471710  
Pd 13.681669 14.063994 33.413460  
Pd 12.598394 16.332506 36.938728  
Pd 16.044737 14.225923 34.752926  
Pd 15.329295 15.560219 37.100098

Pd 13.545771 14.106330 35.873985  
Pd 11.687390 12.569983 34.513161  
Pd 11.131773 14.056447 36.889023  
Pd 14.392001 11.772894 34.686554  
Pd 13.320979 14.099509 38.540245  
Pd 15.412169 12.727507 37.141514  
Pd 12.848482 11.861230 37.019081

05H60C13Ag

H 12.852612 12.636492 20.088570  
H 15.169460 11.995041 20.222828  
H 16.498426 14.006277 20.271137  
H 14.999601 15.890559 20.166452  
H 12.750988 15.038631 20.052816  
C 16.378544 14.016679 21.355896  
C 15.951800 15.210420 22.021519  
C 14.924481 15.846109 21.254391  
C 13.639666 15.845473 21.887310  
C 12.736753 15.021549 21.144041  
C 12.317926 13.843097 21.839931  
C 12.836939 12.684888 21.178818  
C 13.809426 11.966433 21.944729  
C 15.088844 12.063277 21.309090  
C 16.053314 12.811935 22.056623  
C 15.850199 15.213125 23.444241  
C 14.781661 15.946184 24.102095  
C 13.568144 15.839113 23.313026

C 12.522267 15.093293 23.990698  
C 12.267297 13.862019 23.265755  
C 12.631299 12.678839 24.025719  
C 13.739393 12.007351 23.368063  
C 14.957962 12.034996 24.158010  
C 15.953698 12.844819 23.478544  
C 16.285492 14.057007 24.207531  
C 14.699894 15.946886 25.504820  
C 13.397352 15.908092 26.161879  
C 12.459123 15.098062 25.395504  
C 12.068972 13.889914 26.114138  
C 12.567301 12.703521 25.429136  
C 13.575353 11.999879 26.213425  
C 14.876782 12.067133 25.559418  
C 15.835307 12.855780 26.325304  
C 16.192833 14.073301 25.608603  
C 15.725823 15.272640 26.293047  
C 13.325568 15.913457 27.563297  
C 12.300309 15.129982 28.243282  
C 12.002062 13.903191 27.515091  
C 12.408126 12.723742 28.271837  
C 13.504446 12.024207 27.613255  
C 14.729755 12.090432 28.400425  
C 15.754354 12.875106 27.722870  
C 16.051493 14.103137 28.446939  
C 15.644140 15.281487 27.692017  
C 14.550407 15.983995 28.350763

C 12.224349 15.143249 29.645460  
C 11.873343 13.929163 30.368492  
C 12.333940 12.735378 29.673981  
C 13.361696 12.068693 30.459995  
C 14.659263 12.101105 29.802046  
C 15.604571 12.907027 30.565851  
C 15.987547 14.116380 29.849073  
C 15.492934 15.302975 30.536667  
C 14.478880 16.000441 29.752590  
C 13.183207 15.924882 30.410852  
C 11.808352 13.943669 31.783995  
C 12.207867 12.780317 32.555038  
C 13.290306 12.090687 31.872187  
C 14.501782 12.161653 32.661819  
C 15.526575 12.925254 31.975349  
C 15.795234 14.141272 32.713856  
C 15.417726 15.309994 31.946411  
C 14.325171 15.992454 32.614632  
C 13.113295 15.931229 31.821728  
C 12.102489 15.158085 32.523846  
Ag 14.111352 16.819145 34.618790  
Ag 11.507857 15.418205 34.625713  
Ag 13.924585 14.087538 34.155319  
Ag 12.657700 16.842733 36.925148  
Ag 16.529369 14.185607 34.861156  
Ag 15.088089 15.514628 36.891708  
Ag 12.481559 14.045172 37.038300

Ag 11.646274 12.537298 34.665928  
Ag 9.880108 13.922686 36.315353  
Ag 14.363184 11.398143 34.696472  
Ag 14.160788 14.171339 39.147007  
Ag 15.212997 12.819642 36.951103  
Ag 12.912016 11.276404 37.001244

05H60C13Cd

H 12.524390 12.604201 20.143379  
H 14.950295 12.212679 20.154865  
H 16.355742 14.163697 20.205284  
H 14.887519 15.988873 20.196266  
H 12.678264 15.049363 20.140938  
C 16.290285 14.142845 21.294861  
C 15.929510 15.334164 22.013561  
C 14.848017 15.938116 21.286133  
C 13.585496 15.862833 21.950302  
C 12.652370 15.047315 21.232315  
C 12.218959 13.885115 21.915365  
C 12.574817 12.649405 21.232635  
C 13.702197 12.040550 21.923096  
C 14.936386 12.196032 21.246382  
C 15.934227 12.932941 21.963858  
C 15.888243 15.309040 23.427050  
C 14.799296 15.983752 24.130173  
C 13.566977 15.856852 23.380163  
C 12.556712 15.094127 24.076305

C 12.224789 13.890096 23.341694  
C 12.589025 12.676094 24.066904  
C 13.699375 12.055268 23.349653  
C 14.942614 12.116045 24.088926  
C 15.915684 12.926211 23.393814  
C 16.305765 14.103592 24.140705  
C 14.765120 15.955360 25.533718  
C 13.486073 15.883489 26.232784  
C 12.527407 15.083713 25.485344  
C 12.145885 13.872198 26.188202  
C 12.586158 12.679102 25.462326  
C 13.650377 11.987850 26.194593  
C 14.920305 12.092144 25.498102  
C 15.909137 12.853784 26.248430  
C 16.263021 14.082354 25.544561  
C 15.821600 15.268517 26.275116  
C 13.459677 15.877064 27.633898  
C 12.473319 15.065131 28.332228  
C 12.130439 13.859700 27.589794  
C 12.551645 12.658248 28.305992  
C 13.629025 11.972446 27.595058  
C 14.880739 12.038946 28.342136  
C 15.884304 12.837273 27.649372  
C 16.203917 14.050324 28.395950  
C 15.788817 15.250921 27.675489  
C 14.713646 15.944977 28.383780  
C 12.447379 15.050707 29.739611

C 12.119822 13.824045 30.443420  
C 12.518448 12.633490 29.705376  
C 13.579250 11.950933 30.439117  
C 14.854813 12.015419 29.746548  
C 15.785431 12.831649 30.511818  
C 16.175026 14.037308 29.799603  
C 15.712662 15.211725 30.522171  
C 14.689301 15.943816 29.784025  
C 13.421741 15.823748 30.489923  
C 12.117148 13.807549 31.863207  
C 12.543148 12.632315 32.601021  
C 13.559206 11.921797 31.854002  
C 14.768944 12.017644 32.621666  
C 15.758459 12.817946 31.939077  
C 16.073330 14.021519 32.673447  
C 15.704695 15.205581 31.938877  
C 14.646005 15.878512 32.656689  
C 13.405807 15.804783 31.912813  
C 12.496924 14.959273 32.630238  
Cd 14.595746 16.963070 34.661198  
Cd 9.817197 15.505707 34.767033  
Cd 12.953934 14.277330 34.717754  
Cd 12.107888 17.766657 35.773338  
Cd 16.105179 14.171079 34.863102  
Cd 15.216071 15.708045 37.137516  
Cd 13.009251 14.060127 37.806458  
Cd 11.261742 11.679302 34.306633

Cd 10.435640 12.996984 36.712803  
Cd 14.701250 11.372478 34.770523  
Cd 10.802027 15.964648 37.618835  
Cd 15.527618 12.619852 37.243538  
Cd 12.741356 11.152212 36.887115

05H60C13Lu

H 13.102138 12.926847 20.027115  
H 15.451536 12.395257 20.235605  
H 16.704939 14.438697 20.504566  
H 15.086514 16.223219 20.462864  
H 12.862257 15.322697 20.168447  
C 16.528126 14.359157 21.578442  
C 15.996426 15.474823 22.308851  
C 14.965065 16.101770 21.540894  
C 13.655069 15.997819 22.102695  
C 12.806901 15.212943 21.252773  
C 12.408171 13.962237 21.834957  
C 13.033852 12.890850 21.115767  
C 14.014352 12.172567 21.875404  
C 15.316919 12.372156 21.318474  
C 16.218679 13.088700 22.168386  
C 15.830260 15.359397 23.718473  
C 14.686523 15.975977 24.370419  
C 13.518663 15.875252 23.517893  
C 12.464070 15.051043 24.081833  
C 12.284710 13.867169 23.246532

C 12.695408 12.649690 23.935608  
C 13.873802 12.101304 23.294241  
C 15.050059 12.117269 24.146063  
C 16.051369 13.006994 23.578840  
C 16.295286 14.172548 24.415695  
C 14.540567 15.865605 25.764011  
C 13.220098 15.699418 26.347351  
C 12.333824 14.943585 25.473106  
C 11.944220 13.661630 26.073812  
C 12.561984 12.563181 25.330254  
C 13.574868 11.878242 26.116932  
C 14.901399 12.036408 25.539871  
C 15.790272 12.798740 26.417082  
C 16.135822 14.079700 25.806282  
C 15.573493 15.203800 26.549011  
C 13.085036 15.587264 27.746161  
C 12.040420 14.739852 28.299742  
C 11.804453 13.562109 27.456888  
C 12.272233 12.368603 28.160883  
C 13.430593 11.793839 27.516163  
C 14.607767 11.832864 28.370226  
C 15.637260 12.711485 27.807024  
C 15.839720 13.898293 28.631260  
C 15.427838 15.106682 27.938395  
C 14.258423 15.673964 28.598902  
C 11.881963 14.643207 29.686510  
C 11.438429 13.365575 30.279039

C 12.126513 12.282612 29.570015  
C 13.145626 11.661065 30.369310  
C 14.459242 11.748372 29.758148  
C 15.362577 12.520330 30.607607  
C 15.709750 13.815924 30.034121  
C 15.188673 14.956156 30.795301  
C 14.123141 15.591141 30.002487  
C 12.794367 15.370852 30.546791  
C 11.289066 13.259598 31.658360  
C 11.810124 12.109605 32.443142  
C 13.006040 11.560058 31.823452  
C 14.241354 11.459996 32.639381  
C 15.248159 12.395680 31.991264  
C 15.672292 13.557324 32.813057  
C 15.171641 14.940742 32.233162  
C 13.804817 15.637132 32.818092  
C 12.629066 15.272682 31.949577  
C 11.492360 14.499048 32.504055  
Lu 15.095968 17.263458 33.534241  
Lu 11.740668 16.278730 33.950413  
Lu 13.411262 13.426594 33.524105  
Lu 13.161023 17.814999 36.990288  
Lu 17.030642 14.693419 34.128685  
Lu 16.316298 16.731476 37.015598  
Lu 14.097591 15.322180 35.821060  
Lu 10.433195 13.174313 34.030655  
Lu 11.269096 14.974710 36.887955



Lu 15.837715 11.656965 34.217518  
Lu 13.922631 15.094526 38.903038  
Lu 16.113291 13.435831 37.091125  
Lu 13.094029 12.364056 36.638252

05H60C13Hf

H 12.872283 12.645097 20.058823  
H 15.181490 11.982138 20.209555  
H 16.517557 13.991241 20.268911  
H 15.039726 15.890190 20.158911  
H 12.786839 15.055279 20.025373  
C 16.394379 14.001170 21.353357  
C 15.971581 15.196625 22.017767  
C 14.956334 15.847552 21.246416  
C 13.665796 15.854441 21.868504  
C 12.762935 15.036750 21.116411  
C 12.334744 13.857525 21.805710  
C 12.847736 12.692837 21.148911  
C 13.808511 11.964157 21.921642  
C 15.094279 12.050278 21.295364  
C 16.056450 12.797349 22.048561  
C 15.862128 15.196813 23.439882  
C 14.796900 15.939979 24.090424  
C 13.586643 15.844696 23.292934  
C 12.531791 15.103195 23.961111  
C 12.271796 13.874609 23.232044  
C 12.619480 12.687560 23.992056

C 13.727964 12.006033 23.344673  
C 14.941367 12.025875 24.142977  
C 15.947231 12.828658 23.471184  
C 16.282946 14.036371 24.203655  
C 14.706083 15.937266 25.493835  
C 13.399237 15.909947 26.141392  
C 12.462111 15.106759 25.367193  
C 12.055131 13.903297 26.080151  
C 12.546437 12.713376 25.396849  
C 13.540509 12.000014 26.188532  
C 14.846755 12.059858 25.545115  
C 15.804255 12.839532 26.320263  
C 16.178871 14.052754 25.606791  
C 15.721228 15.255955 26.288803  
C 13.318520 15.913324 27.543213  
C 12.280668 15.140708 28.214554  
C 11.979593 13.917195 27.482494  
C 12.360850 12.732434 28.241934  
C 13.455768 12.024516 27.588743  
C 14.673146 12.080282 28.388308  
C 15.706762 12.860260 27.719776  
C 16.016790 14.082412 28.448490  
C 15.628079 15.264206 27.688459  
C 14.537321 15.979125 28.340992  
C 12.196477 15.152646 29.614506  
C 11.793524 13.942414 30.325815  
C 12.277922 12.746984 29.642212

C 13.279205 12.035950 30.431732  
C 14.588255 12.094401 29.786961  
C 15.548126 12.878214 30.557186  
C 15.933087 14.095186 29.848347  
C 15.471714 15.300852 30.532255  
C 14.452868 15.988876 29.740807  
C 13.143159 15.953313 30.384161  
C 11.666286 13.956268 31.733660  
C 12.009220 12.699860 32.500984  
C 13.184867 12.012483 31.842056  
C 14.461097 12.000553 32.650917  
C 15.499487 12.865417 31.968788  
C 15.889795 14.123250 32.714478  
C 15.418162 15.337189 31.942631  
C 14.314420 16.139301 32.601059  
C 13.043253 16.008526 31.791975  
C 11.917306 15.254978 32.467438  
Hf 14.341218 16.611469 34.755482  
Hf 11.422913 15.556420 34.601143  
Hf 13.686947 14.050448 33.139416  
Hf 12.607188 16.458847 37.379288  
Hf 16.233713 14.158738 34.895599  
Hf 15.413524 15.643067 37.545086  
Hf 13.524717 14.092552 36.036865  
Hf 11.516609 12.462015 34.646099  
Hf 10.964891 14.033956 37.319241  
Hf 14.495414 11.595995 34.825470

Hf 13.367058 14.135482 38.935680  
Hf 15.504663 12.714238 37.590294  
Hf 12.755905 11.720472 37.451332

05H60C13Ta

H 12.852427 12.647812 20.084635  
H 15.171762 11.980219 20.231831  
H 16.519588 13.982754 20.288841  
H 15.032841 15.887411 20.175156  
H 12.762872 15.059180 20.049042  
C 16.392441 13.994877 21.372814  
C 15.967905 15.192470 22.034262  
C 14.950672 15.841221 21.262581  
C 13.660367 15.852931 21.887638  
C 12.748652 15.038381 21.140156  
C 12.318853 13.860372 21.832937  
C 12.833816 12.696424 21.174868  
C 13.798472 11.968193 21.943539  
C 15.084710 12.050600 21.317574  
C 16.052254 12.791320 22.070667  
C 15.859847 15.194041 23.455669  
C 14.795412 15.937472 24.107340  
C 13.583435 15.844573 23.312517  
C 12.526344 15.107572 23.984129  
C 12.261965 13.878049 23.257753  
C 12.612582 12.689800 24.016621  
C 13.720292 12.009577 23.366283

C 14.933832 12.025280 24.163486  
C 15.943417 12.824143 23.491570  
C 16.281700 14.033806 24.221069  
C 14.707189 15.935851 25.512020  
C 13.402550 15.911548 26.160660  
C 12.461541 15.110188 25.390234  
C 12.055874 13.906622 26.104109  
C 12.543457 12.716155 25.421719  
C 13.537644 12.002275 26.211580  
C 14.841385 12.061428 25.566633  
C 15.801774 12.839388 26.337893  
C 16.178619 14.051436 25.623676  
C 15.722405 15.254864 26.306236  
C 13.323774 15.914097 27.564743  
C 12.284810 15.145069 28.237503  
C 11.986314 13.920932 27.508574  
C 12.363296 12.736510 28.267004  
C 13.456751 12.029808 27.614056  
C 14.674354 12.080688 28.410145  
C 15.703874 12.860907 27.739239  
C 16.019951 14.080983 28.466787  
C 15.628516 15.262009 27.708214  
C 14.541458 15.979305 28.360788  
C 12.202452 15.157934 29.639935  
C 11.799740 13.947864 30.350712  
C 12.283409 12.751604 29.670124  
C 13.282991 12.037161 30.457964

C 14.590960 12.095952 29.812624  
C 15.553416 12.877838 30.579857  
C 15.935806 14.093762 29.868019  
C 15.475533 15.299470 30.550146  
C 14.457199 15.989618 29.763586  
C 13.148378 15.959867 30.406935  
C 11.689773 13.962239 31.754953  
C 12.034060 12.719797 32.539753  
C 13.194301 12.028516 31.864719  
C 14.458922 12.027534 32.686905  
C 15.493018 12.875462 31.987755  
C 15.865780 14.123278 32.748596  
C 15.411920 15.325704 31.957205  
C 14.314967 16.109684 32.633553  
C 13.055326 15.998464 31.812506  
C 11.946013 15.246247 32.505814  
Ta 14.268078 16.419592 34.784527  
Ta 11.581105 15.436260 34.636322  
Ta 13.690503 14.051627 33.174728  
Ta 12.642842 16.346954 37.133736  
Ta 16.032833 14.158398 34.914505  
Ta 15.337048 15.573152 37.301247  
Ta 13.534927 14.090681 35.913216  
Ta 11.682627 12.571618 34.676155  
Ta 11.090049 14.023658 37.076950  
Ta 14.428245 11.782963 34.847069  
Ta 13.385944 14.132361 38.651260

Ta 15.429649 12.777174 37.342857  
Ta 12.800191 11.819025 37.200996

05H60C13W

H 12.854225 12.590452 20.127869  
H 15.172270 11.935273 20.274139  
H 16.499298 13.945556 20.304399  
H 15.019046 15.860804 20.175327  
H 12.763215 15.001596 20.067900  
C 16.378075 13.969889 21.388802  
C 15.959835 15.174953 22.038387  
C 14.940491 15.819788 21.262978  
C 13.651884 15.828185 21.895170  
C 12.752223 14.993351 21.159252  
C 12.328332 13.821554 21.865208  
C 12.839773 12.651882 21.217451  
C 13.805247 11.929629 21.991140  
C 15.087353 12.017105 21.359114  
C 16.049879 12.773107 22.102413  
C 15.858682 15.193085 23.458603  
C 14.794596 15.941922 24.106703  
C 13.579082 15.833662 23.318218  
C 12.531387 15.091151 24.001720  
C 12.275573 13.852981 23.290174  
C 12.628038 12.673418 24.058725  
C 13.732642 11.985777 23.412321  
C 14.949188 12.018903 24.209087

C 15.945221 12.822252 23.523935  
C 16.282944 14.040370 24.236246  
C 14.712929 15.958599 25.508251  
C 13.408833 15.927740 26.159765  
C 12.470253 15.108401 25.405272  
C 12.079279 13.908420 26.134224  
C 12.559867 12.710278 25.462872  
C 13.554590 11.998477 26.259672  
C 14.860563 12.069721 25.610323  
C 15.806767 12.873532 26.368452  
C 16.185192 14.074577 25.637709  
C 15.736390 15.289997 26.307356  
C 13.336591 15.945571 27.561165  
C 12.311125 15.170862 28.248123  
C 12.014816 13.935587 27.539692  
C 12.388895 12.757292 28.306969  
C 13.475551 12.033554 27.657629  
C 14.695196 12.120951 28.453703  
C 15.708861 12.913315 27.773872  
C 16.029034 14.140736 28.484108  
C 15.650277 15.315839 27.705574  
C 14.556546 16.032297 28.347395  
C 12.238834 15.202217 29.649860  
C 11.857223 13.997526 30.369164  
C 12.309729 12.788061 29.711901  
C 13.302185 12.074782 30.521099  
C 14.608845 12.155186 29.855993

C 15.527078 12.987871 30.602566  
C 15.938705 14.179931 29.886255  
C 15.495584 15.407928 30.553854  
C 14.477210 16.067940 29.752029  
C 13.185690 16.017738 30.403400  
C 11.755877 14.030725 31.777889  
C 12.055739 12.803879 32.596790  
C 13.214433 12.088099 31.924850  
C 14.486332 12.131492 32.759201  
C 15.458718 13.011577 32.018620  
C 15.851379 14.268105 32.738949  
C 15.418982 15.455150 31.956160  
C 14.320819 16.189898 32.680885  
C 13.104677 16.063936 31.813131  
C 12.006336 15.331272 32.492226  
W 14.199233 16.278854 34.857189  
W 11.504487 15.327026 34.518627  
W 13.697373 14.124742 33.230354  
W 12.138560 16.253853 36.645851  
W 16.020662 14.026267 34.801949  
W 15.737011 15.242760 36.852703  
W 13.523916 14.149946 35.989838  
W 11.725254 12.709230 34.711342  
W 11.127888 13.890335 36.984604  
W 14.455967 11.941704 34.895947  
W 13.088248 13.416376 38.476986  
W 15.226978 12.745134 37.296585

W 12.719994 11.588068 36.895802

05H60C13Re

H 12.853661 12.582101 20.145248  
H 15.159318 11.888020 20.297874  
H 16.505905 13.886410 20.332689  
H 15.037809 15.797483 20.193949  
H 12.765849 14.989459 20.077406  
C 16.378845 13.911922 21.416384  
C 15.963690 15.118699 22.063383  
C 14.953811 15.765950 21.281553  
C 13.666035 15.804478 21.907402  
C 12.754354 14.982001 21.168413  
C 12.323214 13.814870 21.878372  
C 12.835451 12.645391 21.234650  
C 13.787391 11.914098 22.011953  
C 15.072642 11.974436 21.382164  
C 16.044157 12.716431 22.128670  
C 15.855243 15.136938 23.485683  
C 14.803035 15.902824 24.124975  
C 13.587969 15.817842 23.328304  
C 12.529322 15.088974 24.009712  
C 12.265167 13.850748 23.302380  
C 12.607926 12.670252 24.076668  
C 13.710376 11.974751 23.434557  
C 14.922289 11.987887 24.233070  
C 15.937854 12.767409 23.548166

C 16.279404 13.987373 24.263836  
C 14.711191 15.922122 25.524635  
C 13.396443 15.944456 26.166876  
C 12.458679 15.116682 25.410656  
C 12.064259 13.922396 26.142368  
C 12.538012 12.715147 25.478752  
C 13.529088 12.007323 26.282969  
C 14.832436 12.037718 25.635984  
C 15.806787 12.811047 26.398424  
C 16.176510 14.019969 25.663660  
C 15.700886 15.223602 26.327398  
C 13.310799 15.979816 27.557985  
C 12.278917 15.205224 28.244381  
C 11.993989 13.962991 27.546854  
C 12.361357 12.788339 28.324518  
C 13.448422 12.055840 27.685398  
C 14.664096 12.109336 28.479330  
C 15.715221 12.851030 27.795055  
C 16.012794 14.092581 28.508064  
C 15.599085 15.250218 27.731987  
C 14.533085 16.009262 28.360044  
C 12.193420 15.253619 29.648188  
C 11.843431 14.055799 30.372147  
C 12.284124 12.834270 29.722765  
C 13.282077 12.140559 30.532974  
C 14.581122 12.148098 29.890020  
C 15.565264 12.912005 30.650415

C 15.921579 14.127299 29.905670  
C 15.392673 15.310608 30.548813  
C 14.439918 16.049719 29.760118  
C 13.118155 16.110912 30.404907  
C 11.747316 14.096261 31.786114  
C 12.022403 12.861468 32.607147  
C 13.190826 12.159508 31.946894  
C 14.449492 12.131704 32.782768  
C 15.501111 12.937615 32.048477  
C 15.835599 14.213803 32.787895  
C 15.309242 15.360170 31.968464  
C 14.268463 16.194084 32.646843  
C 13.022733 16.179642 31.790369  
C 11.966740 15.385533 32.518150  
Re 14.345680 16.332069 34.734985  
Re 11.618411 15.363856 34.565964  
Re 13.679169 14.149092 33.154816  
Re 12.657207 16.333618 36.665688  
Re 15.930052 14.583470 34.807930  
Re 14.655676 15.274101 37.669907  
Re 13.613832 13.985678 35.729126  
Re 11.552411 12.985765 34.632538  
Re 11.630667 14.205009 37.340084  
Re 14.540647 11.764175 34.854263  
Re 13.666775 13.057832 38.062901  
Re 15.805592 12.927270 36.584221  
Re 12.635426 11.573539 36.285633

05H60C13Os

H 12.848909 12.651480 20.121864  
H 15.175115 11.987199 20.265022  
H 16.509331 13.995340 20.323185  
H 15.016086 15.896714 20.212130  
H 12.747762 15.064056 20.092649  
C 16.379938 14.006092 21.406773  
C 15.957129 15.201525 22.070894  
C 14.936516 15.846438 21.299278  
C 13.649624 15.855377 21.930956  
C 12.742198 15.037379 21.183634  
C 12.318445 13.858244 21.875393  
C 12.837269 12.700405 21.212055  
C 13.801871 11.970439 21.977772  
C 15.086717 12.060140 21.350237  
C 16.050583 12.801538 22.105797  
C 15.851997 15.202341 23.491982  
C 14.787164 15.940486 24.146873  
C 13.574505 15.845208 23.354013  
C 12.520471 15.104933 24.027784  
C 12.264898 13.873909 23.300045  
C 12.618345 12.686004 24.054483  
C 13.725220 12.008373 23.399290  
C 14.939846 12.028392 24.197754  
C 15.942907 12.834095 23.525866  
C 16.282509 14.043697 24.255056

C 14.700926 15.941612 25.550116  
C 13.394744 15.920295 26.197886  
C 12.455962 15.108763 25.430271  
C 12.068884 13.899305 26.142788  
C 12.548134 12.707785 25.457870  
C 13.543277 11.986276 26.246401  
C 14.849793 12.059825 25.598967  
C 15.801499 12.846983 26.367828  
C 16.181377 14.059639 25.654799  
C 15.718106 15.261357 26.340031  
C 13.317575 15.925051 27.596401  
C 12.285395 15.142159 28.271360  
C 12.002225 13.912112 27.548910  
C 12.375588 12.724786 28.299774  
C 13.464067 12.005143 27.643345  
C 14.683882 12.080050 28.439966  
C 15.705580 12.867940 27.771156  
C 16.024773 14.087385 28.501459  
C 15.628115 15.268507 27.740627  
C 14.536644 15.976213 28.391169  
C 12.207465 15.156274 29.670967  
C 11.857064 13.939624 30.379681  
C 12.299897 12.738547 29.702868  
C 13.289398 12.001594 30.493891  
C 14.598315 12.094773 29.845779  
C 15.529613 12.899659 30.609270  
C 15.937715 14.102538 29.900574

|                                  |                                 |
|----------------------------------|---------------------------------|
| C 15.464797 15.304155 30.583055  | 05H60C13Ir                      |
| C 14.453055 15.991529 29.798527  | H 12.795568 12.647449 20.114365 |
| C 13.144436 15.978678 30.439499  | H 15.125866 12.070654 20.254633 |
| C 11.752815 13.954086 31.796190  | H 16.513851 14.044719 20.313892 |
| C 12.076921 12.721877 32.592506  | H 15.015876 15.904221 20.214863 |
| C 13.197551 11.983910 31.892063  | H 12.758000 15.039963 20.100891 |
| C 14.446699 12.053832 32.739407  | C 16.387312 14.051604 21.397619 |
| C 15.464237 12.898479 32.026966  | C 15.981045 15.248224 22.074734 |
| C 15.836039 14.136582 32.805325  | C 14.940266 15.859070 21.302511 |
| C 15.399900 15.336235 31.992004  | C 13.655315 15.826642 21.934021 |
| C 14.297326 16.087936 32.685444  | C 12.737542 15.022716 21.192223 |
| C 13.052000 16.023554 31.840139  | C 12.278393 13.856524 21.878529 |
| C 11.976131 15.234876 32.557625  | C 12.786823 12.695575 21.204252 |
| Os 14.218924 16.262693 34.774422 | C 13.772931 11.990232 21.971733 |
| Os 11.666691 15.367226 34.600216 | C 15.049081 12.119550 21.342567 |
| Os 13.699303 14.052178 33.142887 | C 16.018320 12.851970 22.090305 |
| Os 12.662703 16.232382 36.786324 | C 15.885412 15.244418 23.488688 |
| Os 15.907694 14.150343 34.876289 | C 14.793168 15.949333 24.151464 |
| Os 15.280053 15.480778 36.964039 | C 13.584213 15.816690 23.364021 |
| Os 13.524966 14.081382 35.795624 | C 12.529377 15.084733 24.033125 |
| Os 11.797187 12.646269 34.659199 | C 12.224018 13.865637 23.298870 |
| Os 11.188503 14.011705 36.722206 | C 12.574345 12.669809 24.055269 |
| Os 14.404469 11.909590 34.823315 | C 13.699247 12.024285 23.393444 |
| Os 13.339521 14.150138 38.258804 | C 14.916553 12.076313 24.186687 |
| Os 15.322758 12.855705 37.037773 | C 15.920554 12.876726 23.515512 |
| Os 12.853951 11.879882 36.835220 | C 16.298765 14.068697 24.249979 |
|                                  | C 14.718401 15.946593 25.550512 |



C 13.422153 15.854183 26.201921  
C 12.463080 15.082071 25.436218  
C 12.012615 13.881972 26.142704  
C 12.504286 12.685526 25.449375  
C 13.527750 11.997804 26.239632  
C 14.830958 12.099608 25.589527  
C 15.785694 12.880758 26.356699  
C 16.208277 14.081187 25.645319  
C 15.772293 15.298362 26.341654  
C 13.352095 15.847938 27.609085  
C 12.301372 15.093719 28.268782  
C 11.934359 13.885738 27.529842  
C 12.322780 12.689095 28.290342  
C 13.444342 12.013043 27.631292  
C 14.663795 12.123507 28.426569  
C 15.695090 12.901558 27.759262  
C 16.062357 14.107182 28.490204  
C 15.700267 15.311114 27.726528  
C 14.569419 15.970366 28.392429  
C 12.215533 15.098265 29.665531  
C 11.737795 13.895926 30.370409  
C 12.229821 12.688880 29.680326  
C 13.270848 12.018209 30.471079  
C 14.582479 12.131276 29.825470  
C 15.518154 12.939563 30.582378  
C 15.991600 14.122034 29.886190  
C 15.576539 15.358842 30.586882

C 14.496280 15.980873 29.788813  
C 13.205740 15.828527 30.420835  
C 11.615010 13.909920 31.753223  
C 12.098164 12.747416 32.569164  
C 13.183786 11.994228 31.865742  
C 14.426029 12.124460 32.707954  
C 15.458347 12.939162 31.998644  
C 15.822672 14.161758 32.780579  
C 15.536998 15.406451 31.968086  
C 14.345076 16.026985 32.673683  
C 13.113938 15.865228 31.840427  
C 12.011778 15.141257 32.537735  
Ir 14.255363 16.289206 34.723305  
Ir 11.681023 15.317139 34.563232  
Ir 13.718888 14.062782 33.227814  
Ir 12.703037 16.192141 36.863914  
Ir 15.950520 14.155636 34.849358  
Ir 15.209902 15.465980 37.053814  
Ir 13.538073 14.070924 35.823853  
Ir 11.757902 12.603416 34.605453  
Ir 11.259300 13.998683 36.836426  
Ir 14.397262 11.914728 34.766136  
Ir 13.375023 14.085552 38.482906  
Ir 15.332875 12.859267 37.082672  
Ir 12.851021 11.948209 36.945869

05H60C13Pt

|                                 |                                 |
|---------------------------------|---------------------------------|
| H 12.876451 12.647567 20.119219 | C 12.445651 15.099042 25.426828 |
| H 15.190684 12.026386 20.261341 | C 12.056030 13.885663 26.138632 |
| H 16.501093 14.037104 20.325373 | C 12.558897 12.698037 25.453302 |
| H 15.006910 15.902203 20.214258 | C 13.565368 11.994994 26.243193 |
| H 12.767743 15.042738 20.089588 | C 14.872546 12.069646 25.596554 |
| C 16.385420 14.044640 21.410378 | C 15.821886 12.862618 26.370163 |
| C 15.952988 15.233520 22.076895 | C 16.181755 14.084639 25.657164 |
| C 14.927199 15.863009 21.301905 | C 15.707548 15.283115 26.344189 |
| C 13.641119 15.850899 21.930079 | C 13.295459 15.919800 27.593447 |
| C 12.745262 15.024847 21.180536 | C 12.267325 15.126613 28.264553 |
| C 12.329931 13.844530 21.871954 | C 11.980187 13.895943 27.533291 |
| C 12.854925 12.690259 21.209515 | C 12.379822 12.711614 28.290733 |
| C 13.826983 11.974294 21.976957 | C 13.482969 12.010230 27.636698 |
| C 15.107512 12.083582 21.347893 | C 14.704152 12.078603 28.435963 |
| C 16.060413 12.836945 22.104006 | C 15.730861 12.874613 27.763790 |
| C 15.845959 15.231216 23.498346 | C 16.019491 14.104467 28.496447 |
| C 14.772912 15.960617 24.152460 | C 15.618766 15.288677 27.738087 |
| C 13.564457 15.844579 23.354803 | C 14.517105 15.991931 28.393738 |
| C 12.519009 15.092982 24.026552 | C 12.171906 15.142509 29.657856 |
| C 12.270741 13.861811 23.297482 | C 11.793919 13.915145 30.363708 |
| C 12.633917 12.677250 24.053896 | C 12.289347 12.714838 29.684483 |
| C 13.748085 12.010986 23.399549 | C 13.309530 12.017886 30.473244 |
| C 14.961354 12.044560 24.198811 | C 14.625246 12.079566 29.830170 |
| C 15.955935 12.861971 23.525990 | C 15.574981 12.886944 30.599403 |
| C 16.279537 14.072860 24.259026 | C 15.947498 14.114711 29.891804 |
| C 14.684812 15.961342 25.551445 | C 15.459332 15.316342 30.571404 |
| C 13.376610 15.915866 26.199144 | C 14.434808 16.010918 29.787252 |

C 13.116963 15.955494 30.427174  
C 11.663148 13.924211 31.756599  
C 12.120188 12.746502 32.554394  
C 13.213717 11.991711 31.870321  
C 14.449044 12.114779 32.701187  
C 15.524544 12.876387 31.998104  
C 15.771125 14.137311 32.758739  
C 15.405879 15.351790 31.969021  
C 14.258940 16.019844 32.652775  
C 13.018259 16.002161 31.822458  
C 12.000525 15.160708 32.524414  
Pt 14.247423 16.424959 34.658768  
Pt 11.539769 15.397445 34.499554  
Pt 13.677207 14.043300 33.337872  
Pt 12.620064 16.275181 36.904606  
Pt 16.057253 14.173821 34.779358  
Pt 15.298190 15.549172 37.088085  
Pt 13.529537 14.070350 35.834652  
Pt 11.681030 12.521773 34.537334  
Pt 11.107522 13.969639 36.869682  
Pt 14.473403 11.763772 34.717564  
Pt 13.364518 14.096845 38.473774  
Pt 15.427464 12.796082 37.128357  
Pt 12.833940 11.819104 36.961720

05H60C13Au

H 12.811958 12.731995 20.032652

H 15.121983 12.098975 20.145561  
H 16.442343 14.107528 20.218494  
H 14.946920 15.985135 20.157227  
H 12.704918 15.136626 20.038342  
C 16.336140 14.098935 21.304537  
C 15.909574 15.277529 21.995182  
C 14.878470 15.926126 21.244751  
C 13.598711 15.912214 21.884380  
C 12.694680 15.100836 21.128941  
C 12.284685 13.909195 21.806091  
C 12.800060 12.762280 21.123466  
C 13.776204 12.033851 21.874207  
C 15.050141 12.144951 21.233545  
C 16.016882 12.881958 21.986616  
C 15.819710 15.254519 23.419140  
C 14.755561 15.975167 24.095011  
C 13.538324 15.879921 23.309711  
C 12.497120 15.122290 23.978926  
C 12.238271 13.903367 23.232967  
C 12.606400 12.708571 23.973145  
C 13.713509 12.053030 23.299814  
C 14.934611 12.070765 24.085491  
C 15.925925 12.890028 23.412045  
C 16.262287 14.087541 24.162003  
C 14.681205 15.953860 25.497164  
C 13.380642 15.908475 26.156693  
C 12.439186 15.108315 25.381992

C 12.052075 13.889035 26.082300  
C 12.547904 12.711376 25.376482  
C 13.560541 11.997187 26.148674  
C 14.858965 12.078640 25.488415  
C 15.820159 12.852671 26.265825  
C 16.176786 14.080532 25.564461  
C 15.710572 15.268727 26.271454  
C 13.313692 15.896471 27.556602  
C 12.291161 15.102373 28.226685  
C 11.990591 13.883679 27.481894  
C 12.393631 12.689205 28.217817  
C 13.492505 11.999586 27.547592  
C 14.719440 12.058205 28.333073  
C 15.742822 12.852509 27.664902  
C 16.046795 14.070395 28.409992  
C 15.633680 15.259018 27.671028  
C 14.541093 15.955872 28.342726  
C 12.225082 15.090410 29.629583  
C 11.870152 13.869323 30.324158  
C 12.323807 12.685438 29.617239  
C 13.352551 12.022061 30.397530  
C 14.642386 12.062609 29.736504  
C 15.566208 12.863058 30.515779  
C 15.974133 14.065113 29.810169  
C 15.474276 15.231546 30.514750  
C 14.469296 15.940763 29.746088  
C 13.186059 15.840840 30.417345

C 11.785870 13.858751 31.735399  
C 12.155154 12.661342 32.467659  
C 13.280756 12.015846 31.812687  
C 14.484562 12.071543 32.613091  
C 15.491785 12.855490 31.931826  
C 15.853615 14.056785 32.664532  
C 15.413581 15.228070 31.927908  
C 14.341482 15.914662 32.616482  
C 13.116464 15.824080 31.837563  
C 12.067335 15.058369 32.492443  
Au 14.322483 16.192146 34.617500  
Au 11.691206 15.215433 34.470238  
Au 14.367240 15.557862 37.314495  
Au 12.372652 17.137938 36.347164  
Au 16.232765 14.150924 34.632095  
Au 16.967707 15.018140 37.065472  
Au 11.826828 14.606971 37.181545  
Au 11.621192 12.418427 34.385040  
Au 10.248539 12.509466 36.693195  
Au 14.440302 11.892279 34.634697  
Au 13.534174 13.644711 39.102417  
Au 15.349830 12.838262 37.029491  
Au 12.891693 11.931873 36.889904

05H60C13Hg

H 12.905404 12.678836 20.002411  
H 15.192301 11.938904 20.133942

H 16.440495 14.042154 20.172146  
H 15.014322 15.968809 20.087496  
H 12.811283 15.082505 19.974230  
C 16.364761 14.048259 21.260857  
C 15.948384 15.242505 21.931915  
C 14.943609 15.923319 21.175673  
C 13.655028 15.921875 21.812113  
C 12.782447 15.069932 21.065378  
C 12.377076 13.885052 21.752676  
C 12.876781 12.714338 21.093065  
C 13.817723 11.960897 21.855799  
C 15.113327 12.018169 21.219248  
C 16.033760 12.846880 21.950161  
C 15.854138 15.245767 23.355267  
C 14.802392 15.994262 24.021978  
C 13.581657 15.911466 23.232168  
C 12.549082 15.136538 23.905085  
C 12.311199 13.904571 23.180632  
C 12.661043 12.719001 23.930698  
C 13.744225 12.002437 23.271673  
C 14.972253 12.033473 24.062874  
C 15.941188 12.871923 23.377502  
C 16.270771 14.078115 24.108021  
C 14.728523 15.988697 25.421926  
C 13.425493 15.944217 26.082462  
C 12.490990 15.136982 25.309082  
C 12.105574 13.927756 26.020596

C 12.588781 12.734173 25.334442  
C 13.587315 12.010588 26.117685  
C 14.892069 12.067881 25.459480  
C 15.831316 12.876920 26.226646  
C 16.199032 14.088495 25.510996  
C 15.755273 15.296862 26.199846  
C 13.367124 15.933346 27.483727  
C 12.375056 15.134306 28.177591  
C 12.032143 13.934732 27.421213  
C 12.404274 12.731596 28.154417  
C 13.511962 12.030651 27.514084  
C 14.724640 12.138288 28.322073  
C 15.746046 12.901440 27.629166  
C 16.076084 14.118717 28.346836  
C 15.696889 15.318524 27.592459  
C 14.596795 16.037605 28.257275  
C 12.327415 15.110061 29.596939  
C 11.839622 13.905539 30.245934  
C 12.278839 12.701485 29.544161  
C 13.301289 12.020862 30.333378  
C 14.620529 12.175666 29.735388  
C 15.492232 13.036261 30.528217  
C 16.033165 14.164294 29.748133  
C 15.687012 15.450756 30.338303  
C 14.564058 16.077179 29.650570  
C 13.309687 15.833112 30.397593  
C 11.729851 13.876209 31.653469

C 12.040054 12.654137 32.380215  
C 13.172442 12.006390 31.740416  
C 14.253656 12.353217 32.591347  
C 15.233585 13.156381 31.951328  
C 15.519500 14.446579 32.550606  
C 15.727954 15.550601 31.715092  
C 14.579877 15.713550 32.543434  
C 13.286245 15.661546 31.834740  
C 12.258922 14.918864 32.460659  
Hg 14.406843 16.883635 34.666027  
Hg 10.658686 16.401157 34.756599  
Hg 12.885307 13.436205 34.289444

Hg 12.387223 17.261909 37.729160  
Hg 16.550167 14.080131 34.780960  
Hg 15.974994 16.092016 37.951653  
Hg 13.545868 14.288557 36.785988  
Hg 9.999905 11.223493 35.035820  
Hg 10.220371 14.047559 37.519451  
Hg 15.072624 10.297168 34.964077  
Hg 13.210542 14.127270 39.818203  
Hg 16.150810 12.396288 37.879932  
Hg 12.580695 11.060167 37.767761
